# Supplementary material for: BRS1 mediates plant redox regulation and cold responses
Source: Research Square preprint supplement (doi:10.21203/rs.3.rs-59649/v2), 2021-01-05
Supplement: Supplementary file 1 [file 7ebc95b5e64ff6b69e90a57e.xlsx]

## Sheet: brs1-1D
Table S1 Identification of DEGs in BRS1 mutants
Gene	log2FoldChange	pvalue	padj	WS2_FPKM	WS2_Count	OE_FPKM	OE_Count	Gene_name	Description	Type
AT4G15620	7.61722	4.75e-13	6.56e-11	0.0440737	0.666667	11.0594	128	NA	CASP-like protein 1E2 [Source:UniProtKB/Swiss-Prot%3BAcc:O23413]	UP
AT2G07240	7.25387	3.47e-37	8.21e-34	0.0594589	2.33333	12.8073	348.667	NA	Cysteine-type peptidase [Source:UniProtKB/TrEMBL%3BAcc:F4IK98]	UP
AT4G30610	4.40045	0	0	32.9641	961	701.042	19644	SCPL24	Serine carboxypeptidase 24 [Source:UniProtKB/Swiss-Prot%3BAcc:Q9M099]	UP
AT2G42530	3.41557	8.67e-07	3.11e-05	6.30269	60	64.7074	650.667	COR15B	Protein COLD-REGULATED 15B%2C chloroplastic [Source:UniProtKB/Swiss-Prot%3BAcc:Q9SIN5]	UP
AT4G30180	3.23391	0.00322023	0.0269359	6.78e-05	1	1.05169	9.33333	BHLH146	Transcription factor bHLH146 [Source:UniProtKB/Swiss-Prot%3BAcc:Q9SUM5]	UP
AT4G11880	3.16063	1.67e-11	1.79e-09	0.395364	7	4.0011	59.6667	AGL14	Agamous-like MADS-box protein AGL14 [Source:UniProtKB/Swiss-Prot%3BAcc:Q38838]	UP
AT4G25480	3.09171	2.95e-06	8.99e-05	0.194241	3	1.71247	25	DREB1A	Dehydration-responsive element-binding protein 1A [Source:UniProtKB/Swiss-Prot%3BAcc:Q9M0L0]	UP
AT4G25490	2.68863	0.000166681	0.00256382	0.208575	3.66667	1.42863	22.3333	DREB1B	DRE/CRT-binding factor 1 [Source:UniProtKB/TrEMBL%3BAcc:B6DTR3]	UP
AT4G37770	2.51848	4.26e-08	2.2e-06	0.317624	8.66667	1.90923	47.3333	ACS8	1-aminocyclopropane-1-carboxylate synthase-like protein [Source:UniProtKB/TrEMBL%3BAcc:Q56Y32]	UP
AT3G47340	2.46126	1.1e-25	7.18e-23	1.28374	49	7.32172	258.667	ASN1	DIN6 [Source:UniProtKB/TrEMBL%3BAcc:A0A178VBT4]	UP
AT5G50790	2.4507	7.4e-06	0.000198078	0.415297	6	2.19566	33.3333	SWEET10	Bidirectional sugar transporter SWEET10 [Source:UniProtKB/Swiss-Prot%3BAcc:Q9LUE3]	UP
AT4G19430	2.44088	4.05e-05	0.000834671	0.647666	5.66667	3.78175	29	NA	At4g19430 [Source:UniProtKB/TrEMBL%3BAcc:Q67Y03]	UP
AT4G25470	2.327	0.00365963	0.0296408	1.20665	18	6.04129	94	DREB1C	C-repeat binding factor 2 [Source:UniProtKB/TrEMBL%3BAcc:B2BIW9]	UP
AT5G52310	2.30208	1.02e-20	4.47e-18	9.6643	553.333	48.4864	2638	RD29A	Low-temperature-induced 78 kDa protein [Source:UniProtKB/Swiss-Prot%3BAcc:Q06738]	UP
AT2G01008	2.2277	0.000632317	0.00738771	0.780137	20.3333	3.69221	102.333	NA	FUNCTIONS IN: molecular_function unknown%3B INVOLVED IN: biological_process unknown%3B LOCATED IN: cellular_component unknown%3B BEST Arabidopsis thaliana protein match is: maternal effect embryo arrest 38 (TAIR:AT3G43160.1). [Source:TAIR%3BAcc:AT2G01008]	UP
AT1G13470	2.1442	0.00651857	0.0451763	0.774193	20.3333	3.61526	80.6667	NA	Protein of unknown function (DUF1262) [Source:TAIR%3BAcc:AT1G13470]	UP
AT2G22810	2.1063	0.000170935	0.0026186	0.290504	6	1.24477	25.6667	ACS4	1-aminocyclopropane-1-carboxylate synthase 4 [Source:UniProtKB/Swiss-Prot%3BAcc:Q43309]	UP
AT1G12010	2.09111	2.87e-06	8.8e-05	0.589226	14.3333	2.72807	58.3333	NA	1-aminocyclopropane-1-carboxylate oxidase 3 [Source:UniProtKB/Swiss-Prot%3BAcc:O65378]	UP
AT5G15970	2.077	1.12e-09	8.33e-08	57.7621	385.667	246.751	1562.33	KIN2	KIN2 [Source:UniProtKB/TrEMBL%3BAcc:A0A384KRF8]	UP
AT1G29395	2.04373	1.21e-63	1.14e-59	23.2583	288.333	96.1362	1174.67	COR413IM1	Cold-regulated 413 inner membrane protein 1%2C chloroplastic [Source:UniProtKB/Swiss-Prot%3BAcc:Q94AL8]	UP
AT2G30750	1.98385	0.000711745	0.00815939	1.02193	34	4.22833	124.667	CYP71A12	Cytochrome P450 71A12 [Source:UniProtKB/Swiss-Prot%3BAcc:O49340]	UP
AT1G09350	1.9558	0.00359813	0.0292933	0.237992	5.33333	0.951288	20	GOLS3	Hexosyltransferase (Fragment) [Source:UniProtKB/TrEMBL%3BAcc:W8PVD7]	UP
AT1G77640	1.90029	0.000404803	0.00520571	0.614191	6.33333	2.35697	23	ERF013	Ethylene-responsive transcription factor ERF013 [Source:UniProtKB/Swiss-Prot%3BAcc:Q9CAP4]	UP
AT1G26390	1.89096	0.00615019	0.0433171	0.756121	26.6667	2.91829	88.3333	FOX2	Berberine bridge enzyme-like 4 [Source:UniProtKB/Swiss-Prot%3BAcc:Q9FZC5]	UP
AT5G44440	1.84167	5.39e-10	4.43e-08	1.02988	35.6667	3.80446	121.667	NA	FAD-binding Berberine family protein [Source:TAIR%3BAcc:AT5G44440]	UP
AT5G56840	1.81078	0.00336708	0.0278927	0.449059	5	1.49035	18	NA	At5g56840 [Source:UniProtKB/TrEMBL%3BAcc:Q9FJS9]	UP
AT3G19550	1.80658	0.000155419	0.00243049	1.21626	12	4.37472	40.6667	NA	Glutamate racemase [Source:UniProtKB/TrEMBL%3BAcc:Q8LEN7]	UP
AT1G49570	1.78905	0.00328832	0.0273723	0.432846	7.66667	1.47605	26.3333	PER10	Peroxidase [Source:UniProtKB/TrEMBL%3BAcc:A0A178WK78]	UP
AT2G26560	1.78851	0.000160502	0.00248698	2.88589	69.6667	10.1846	225	PLP2	Patatin-like protein 2 [Source:UniProtKB/Swiss-Prot%3BAcc:O48723]	UP
AT5G23240	1.77	4.56e-45	1.72e-41	11.4991	325	40.0604	1077	DJC76	Chaperone protein dnaJ C76%2C chloroplastic [Source:UniProtKB/Swiss-Prot%3BAcc:Q9FMX6]	UP
AT2G40750	1.74596	0.000116123	0.00192224	0.496577	10	1.71987	32.6667	WRKY54	Probable WRKY transcription factor 54 [Source:UniProtKB/Swiss-Prot%3BAcc:Q93WU8]	UP
AT2G04032	1.66837	0.00416071	0.0326822	0.354795	6.33333	1.11226	20	ZIP7	Zinc transporter 7 [Source:UniProtKB/Swiss-Prot%3BAcc:Q8W246]	UP
AT3G57260	1.66696	0.00608998	0.0430735	0.538348	11.6667	1.71761	38.6667	BGL2	Beta-1%2C3-glucanase 2 [Source:UniProtKB/TrEMBL%3BAcc:A0A1I9LMG6]	UP
AT1G08630	1.65928	2.06e-08	1.16e-06	1.14447	31	3.59114	97.6667	THA1	Probable low-specificity L-threonine aldolase 1 [Source:UniProtKB/Swiss-Prot%3BAcc:Q8RXU4]	UP
AT2G46880	1.64328	0.000232671	0.003355	0.50202	13	1.62283	38.6667	PAP14	Probable inactive purple acid phosphatase 14 [Source:UniProtKB/Swiss-Prot%3BAcc:Q84LR6]	UP
AT3G22570	1.62867	0.00250338	0.0223015	1.11763	9.66667	3.56086	29	NA	Bifunctional inhibitor/lipid-transfer protein/seed storage 2S albumin superfamily protein [Source:UniProtKB/TrEMBL%3BAcc:F4J1K4]	UP
AT3G61280	1.62606	0.000513344	0.00628921	0.333344	15	1.23437	43.3333	NA	Glycosyltransferase [Source:UniProtKB/TrEMBL%3BAcc:Q5Q0C1]	UP
AT1G35210	1.62128	0.00436237	0.0338531	0.826153	8	2.69824	23.6667	NA	Uncharacterized protein T32G9.25 [Source:UniProtKB/TrEMBL%3BAcc:Q9C6F2]	UP
AT1G76955	1.59779	0.00278333	0.0242063	1.5582	7.66667	4.87124	22.3333	NA	At1g76955 [Source:UniProtKB/TrEMBL%3BAcc:Q0V819]	UP
AT1G67265	1.57104	0.00737824	0.0492673	1.2211	9.33333	3.83421	26.3333	DVL3	DVL3 [Source:UniProtKB/TrEMBL%3BAcc:Q6X5U0]	UP
AT1G66700	1.55259	7.51e-13	1e-10	3.76559	80.6667	11.2748	232	PXMT1	Paraxanthine methyltransferase 1 [Source:UniProtKB/Swiss-Prot%3BAcc:Q9C9M3]	UP
AT4G18510	1.54629	5.45e-06	0.000153577	4.49052	20.6667	13.2118	58.3333	CLE2	CLE2 [Source:UniProtKB/TrEMBL%3BAcc:A0A178UVM8]	UP
AT5G18050	1.54576	0.000394552	0.00510514	2.91582	14	8.67222	40	SAUR22	Auxin-responsive protein SAUR22 [Source:UniProtKB/Swiss-Prot%3BAcc:Q9FJF7]	UP
AT1G10070	1.52076	6.11e-08	3.01e-06	1.55046	44.3333	4.65524	121.667	BCAT2	Branched-chain-amino-acid aminotransferase 2%2C chloroplastic [Source:UniProtKB/Swiss-Prot%3BAcc:Q9M439]	UP
AT5G20230	1.48708	5.43e-10	4.45e-08	6.19503	88.3333	17.4809	236.333	BCB	SAG14 [Source:UniProtKB/TrEMBL%3BAcc:A0A178UM84]	UP
AT3G05690	1.46929	4.76e-33	6.43e-30	10.2976	227	28.6673	625.667	UNE8	Nuclear factor Y%2C subunit A2 [Source:UniProtKB/TrEMBL%3BAcc:A0A1I9LSX7]	UP
AT1G80840	1.4586	5.53e-05	0.00107026	1.54964	31.3333	4.43215	81.6667	WRKY40	Probable WRKY transcription factor 40 [Source:UniProtKB/Swiss-Prot%3BAcc:Q9SAH7]	UP
AT3G61400	1.42393	0.00139564	0.014056	0.662312	11.6667	1.74903	31.6667	NA	1-aminocyclopropane-1-carboxylate oxidase homolog 8 [Source:UniProtKB/Swiss-Prot%3BAcc:Q9M2C4]	UP
AT3G10780	1.40065	0.00426104	0.0332716	0.802537	10	2.02532	26	NA	Transmembrane emp24 domain-containing protein p24delta6 [Source:UniProtKB/Swiss-Prot%3BAcc:F4J4Y0]	UP
AT5G10210	1.39119	0.000719615	0.00822622	1.1652	17.3333	3.13129	44	NA	At5g10210 [Source:UniProtKB/TrEMBL%3BAcc:Q9LX09]	UP
AT1G15040	1.38989	0.000601662	0.00708649	4.3473	102	11.6606	253.333	GAT1_2.1	Putative glutamine amidotransferase GAT1_2.1 [Source:UniProtKB/Swiss-Prot%3BAcc:Q8H0Z4]	UP
AT5G06510	1.37846	5.45e-07	2.09e-05	2.04355	42	5.48823	107.667	NFYA10	NF-YA10 [Source:UniProtKB/TrEMBL%3BAcc:A0A178URE3]	UP
AT1G18350	1.37271	0.00126685	0.0130155	0.908586	14.6667	2.3062	38.3333	MKK7	MKK7 [Source:UniProtKB/TrEMBL%3BAcc:A0A178W604]	UP
AT3G15450	1.35767	1.26e-33	1.98e-30	146.363	1753.33	377.588	4286.67	NA	AT3g15450/MJK13_11 [Source:UniProtKB/TrEMBL%3BAcc:Q9LE80]	UP
AT1G02340	1.34403	8.28e-08	3.92e-06	2.23552	39.6667	5.75385	99	HFR1	Transcription factor HFR1 [Source:UniProtKB/Swiss-Prot%3BAcc:Q9FE22]	UP
AT3G26830	1.3243	6.87e-07	2.57e-05	2.23295	67	5.8202	164.333	CYP71B15	Bifunctional dihydrocamalexate synthase/camalexin synthase [Source:UniProtKB/Swiss-Prot%3BAcc:Q9LW27]	UP
AT2G22860	1.31789	3.39e-06	0.000100927	6.54047	36	16.2967	87.6667	PSK2	Phytosulfokines 2 [Source:UniProtKB/Swiss-Prot%3BAcc:O81003]	UP
AT1G76650	1.3096	0.000287509	0.0039499	2.14237	24.3333	5.67116	58.6667	CML38	CML38 [Source:UniProtKB/TrEMBL%3BAcc:A0A178WMC5]	UP
AT5G59320	1.30868	0.00202008	0.0188768	3.31396	25.3333	8.21264	62.6667	LTP3	Non-specific lipid-transfer protein 3 [Source:UniProtKB/Swiss-Prot%3BAcc:Q9LLR7]	UP
AT2G46790	1.30242	1.77e-05	0.000411526	1.26401	39	3.23905	94	APRR9	Two-component response regulator-like APRR9 [Source:UniProtKB/Swiss-Prot%3BAcc:Q8L500]	UP
AT2G30790	1.29953	0.00293324	0.0251705	1.02092	12	2.45147	29.6667	PSBP2	Putative oxygen-evolving enhancer protein 2-2 [Source:UniProtKB/Swiss-Prot%3BAcc:O49344]	UP
AT3G14280	1.29596	3.6e-10	3.05e-08	11.5465	108	29.3479	252.333	NA	At3g14280 [Source:UniProtKB/TrEMBL%3BAcc:Q9LUL9]	UP
AT4G36110	1.29557	0.00138143	0.0139352	1.65456	16.6667	4.12357	39.6667	NA	SAUR9 [Source:UniProtKB/TrEMBL%3BAcc:A0A178V0P2]	UP
AT2G18150	1.2937	0.00310377	0.0261586	0.687937	13.3333	1.71942	32	PER15	Peroxidase 15 [Source:UniProtKB/Swiss-Prot%3BAcc:Q9SI16]	UP
AT1G04660	1.28768	6.13e-07	2.32e-05	1.92944	52	4.84371	122.333	NA	Glycine-rich protein [Source:UniProtKB/TrEMBL%3BAcc:O23018]	UP
AT5G18840	1.28241	9.45e-17	2.45e-14	4.63824	140.333	11.5418	332.667	NA	Sugar transporter ERD6-like 16 [Source:UniProtKB/Swiss-Prot%3BAcc:Q8LBI9]	UP
AT3G60140	1.23911	0.00231094	0.0209537	0.679752	22.3333	1.6102	54.3333	BGLU30	Beta-glucosidase 30 [Source:UniProtKB/Swiss-Prot%3BAcc:Q9M1C9]	UP
AT1G11210	1.23339	5.67e-14	9.74e-12	4.95077	110.333	11.7793	256	NA	At1g11210/T28P6_5 [Source:UniProtKB/TrEMBL%3BAcc:Q9SXA7]	UP
AT1G48605	1.22613	0.00351815	0.0288159	2.22788	16.3333	5.35136	36.6667	HAL3B	Probable phosphopantothenoylcysteine decarboxylase [Source:UniProtKB/Swiss-Prot%3BAcc:P94063]	UP
AT2G22122	1.21904	9.3e-15	1.76e-12	21.876	150	52.7685	336	NA	At2g22122 [Source:UniProtKB/TrEMBL%3BAcc:Q8LF43]	UP
AT5G52750	1.21129	0.000609153	0.00715689	3.89897	27	9.06889	61.6667	HIPP13	Heavy metal-associated isoprenylated plant protein 13 [Source:UniProtKB/Swiss-Prot%3BAcc:Q9LTE2]	UP
AT5G45830	1.17678	0.00020184	0.0029786	1.31542	26	2.92606	58	DOG1	delay of germination 1 [Source:TAIR%3BAcc:AT5G45830]	UP
AT3G62460	1.16729	0.00628182	0.0439495	1.24544	15	2.79841	33.3333	NA	AT3g62460/T12C14_160 [Source:UniProtKB/TrEMBL%3BAcc:Q9LZP4]	UP
AT3G45970	1.16556	1.32e-09	9.57e-08	5.64205	70.3333	12.7915	156	EXLA1	Expansin-like A1 [Source:UniProtKB/Swiss-Prot%3BAcc:Q9LZT4]	UP
AT5G02810	1.15632	1.5e-34	2.83e-31	13.4178	702	30.368	1524.67	APRR7	Two-component response regulator-like APRR7 [Source:UniProtKB/Swiss-Prot%3BAcc:Q93WK5]	UP
AT1G20160	1.15599	7.31e-19	2.34e-16	4.96495	203.333	11.1241	447	CRSP	CO(2)-response secreted protease [Source:UniProtKB/Swiss-Prot%3BAcc:Q9LNU1]	UP
AT4G16270	1.15494	0.00462662	0.0351711	1.00438	18	2.21427	40.3333	PER40	Peroxidase 40 [Source:UniProtKB/Swiss-Prot%3BAcc:O23474]	UP
AT5G61160	1.15488	0.00569311	0.041046	4.36837	115.667	9.86819	241.667	ACT	Agmatine coumaroyltransferase [Source:UniProtKB/Swiss-Prot%3BAcc:Q9FNP9]	UP
AT4G15910	1.15051	5.37e-06	0.000152279	5.28514	51.6667	11.9908	109.667	ATDI21	DI21 [Source:UniProtKB/TrEMBL%3BAcc:A0A178UX68]	UP
AT5G62360	1.14104	1.79e-10	1.64e-08	17.2474	179.667	38.6577	381.667	NA	Plant invertase/pectin methylesterase inhibitor superfamily protein [Source:UniProtKB/TrEMBL%3BAcc:Q9LVA3]	UP
AT1G10550	1.14075	3.71e-06	0.000109081	2.79238	44	6.15137	96	XTH33	Probable xyloglucan endotransglucosylase/hydrolase protein 33 [Source:UniProtKB/Swiss-Prot%3BAcc:Q8LC45]	UP
AT5G17040	1.13957	0.000943627	0.0102472	0.740956	20.3333	1.60925	44.3333	UGT78D4	UDP-glycosyltransferase 78D4 [Source:UniProtKB/Swiss-Prot%3BAcc:Q9LFJ9]	UP
AT5G07010	1.12218	6.19e-05	0.00117416	1.84198	41	4.10211	86.6667	SOT15	Sulfotransferase [Source:UniProtKB/TrEMBL%3BAcc:A0A178UG65]	UP
AT2G15960	1.10686	1.86e-27	1.53e-24	192.833	759.333	430.833	1587.33	NA	Expressed protein [Source:UniProtKB/TrEMBL%3BAcc:Q9XIM6]	UP
AT5G57220	1.10437	1.93e-07	8.34e-06	3.1347	91.3333	6.95441	189.333	CYP81F2	Cytochrome P450 81F2 [Source:UniProtKB/Swiss-Prot%3BAcc:Q9LVD6]	UP
AT5G12270	1.10142	0.0015561	0.0153291	1.30513	22.6667	2.84777	47.6667	NA	1-AMINOCYCLOPROPANE-1-CARBOXYLATE OXIDASE-like protein [Source:UniProtKB/TrEMBL%3BAcc:Q94CL5]	UP
AT3G04070	1.09404	6.19e-09	3.98e-07	6.14382	117.333	13.6731	240.667	NAC047	NAC transcription factor 47 [Source:UniProtKB/Swiss-Prot%3BAcc:Q84TD6]	UP
AT1G43800	1.09254	8.08e-05	0.00146162	1.37441	37	3.01842	75	S-ACP-DES6	Stearoyl-[acyl-carrier-protein] 9-desaturase 6%2C chloroplastic [Source:UniProtKB/Swiss-Prot%3BAcc:Q84VY3]	UP
AT1G73260	1.09128	2.67e-07	1.11e-05	57.0215	720.333	121.02	1464.67	KTI1	Kunitz trypsin inhibitor 1 [Source:UniProtKB/Swiss-Prot%3BAcc:Q8RXD5]	UP
AT4G27280	1.09063	0.00505305	0.0375926	18.943	160.667	40.8287	347.667	KRP1	Calcium-binding protein KRP1 [Source:UniProtKB/Swiss-Prot%3BAcc:O81831]	UP
AT1G18000	1.08748	0.0032768	0.0273124	0.634336	19.6667	1.37962	40	NA	UNC93-like protein 1 [Source:UniProtKB/Swiss-Prot%3BAcc:Q56WD3]	UP
AT2G05510	1.08701	0.000370909	0.00487599	45.5165	686.667	97.7405	1452.67	NA	At2g05510 [Source:UniProtKB/TrEMBL%3BAcc:Q9SL16]	UP
AT5G39670	1.08413	0.00309851	0.0261586	1.78189	18.3333	3.93423	38	CML46	Probable calcium-binding protein CML46 [Source:UniProtKB/Swiss-Prot%3BAcc:Q93Z27]	UP
AT3G50800	1.07902	0.00145595	0.0145076	1.98023	21.3333	4.25615	44.3333	NA	Uncharacterized protein At3g50800 [Source:UniProtKB/TrEMBL%3BAcc:Q9SVL8]	UP
AT3G44300	1.07864	1.68e-27	1.45e-24	28.6307	687.667	60.9514	1426	NIT2	NIT2 [Source:UniProtKB/TrEMBL%3BAcc:A0A384LD03]	UP
AT3G21330	1.07323	0.000319322	0.00431175	1.01427	29.6667	2.19589	61	BHLH87	Transcription factor bHLH87 [Source:UniProtKB/Swiss-Prot%3BAcc:Q8S3D2]	UP
AT1G65970	1.06994	2.41e-13	3.64e-11	45.0453	423.667	95.1764	862	PRXIIC	TPX2 [Source:UniProtKB/TrEMBL%3BAcc:A0A178WKG0]	UP
AT5G43780	1.06352	3.41e-14	6.09e-12	17.3751	516.333	36.5752	1046	APS4	ATP sulfurylase 4%2C chloroplastic [Source:UniProtKB/Swiss-Prot%3BAcc:Q9S7D8]	UP
AT4G23220	1.0626	0.000804896	0.00902476	0.796169	31.3333	1.70531	65	CRK14	Cysteine-rich receptor-like protein kinase 14 [Source:UniProtKB/Swiss-Prot%3BAcc:Q8H199]	UP
AT1G10760	1.0606	1.49e-31	1.76e-28	44.3433	3723	92.8198	7663	GWD1	Alpha-glucan water dikinase 1%2C chloroplastic [Source:UniProtKB/Swiss-Prot%3BAcc:Q9SAC6]	UP
AT4G37220	1.05551	8.21e-05	0.00147895	3.52916	41.6667	7.55	83	NA	Cold-regulated 413 plasma membrane protein 4 [Source:UniProtKB/Swiss-Prot%3BAcc:O23164]	UP
AT1G36622	1.04823	0.000338734	0.0045222	7.80881	43	16.5669	85.3333	NA	Transmembrane protein [Source:UniProtKB/TrEMBL%3BAcc:Q1G3E7]	UP
AT1G15380	1.04822	8.56e-14	1.41e-11	15.1821	213.333	31.9021	435	NA	GLYI4 [Source:UniProtKB/TrEMBL%3BAcc:A0A178W6B2]	UP
AT1G02920	1.04606	0.00123152	0.0127565	56.2487	637.667	117.841	1233.67	GSTF7	Glutathione S-transferase F7 [Source:UniProtKB/Swiss-Prot%3BAcc:Q9SRY5]	UP
AT4G24110	1.04221	0.00407406	0.0322507	1.16573	23.6667	2.4606	48.6667	NA	NADP-specific glutamate dehydrogenase [Source:UniProtKB/TrEMBL%3BAcc:O22980]	UP
AT4G14630	1.0421	0.000557548	0.00673417	6.23539	63.6667	13.0468	124.333	GLP9	At4g14630 [Source:UniProtKB/TrEMBL%3BAcc:Q56XY5]	UP
AT4G25020	1.03972	0.00751713	0.0499311	0.593004	16	1.25874	32	NA	At4g25020 [Source:UniProtKB/TrEMBL%3BAcc:Q9SW24]	UP
AT3G16360	1.0385	2.09e-05	0.00047219	6.72086	50.3333	14.1875	101.333	AHP4	AHP4 [Source:UniProtKB/TrEMBL%3BAcc:A0A384KT90]	UP
AT2G19970	1.03295	0.00507359	0.0377306	1.90474	20	3.90927	40.3333	NA	At2g19970 [Source:UniProtKB/TrEMBL%3BAcc:Q9SL83]	UP
AT5G60760	1.02849	0.000438446	0.00556267	0.753594	40	1.62485	78.3333	NA	P-loop NTPase domain-containing protein LPA1 homolog 1 [Source:UniProtKB/Swiss-Prot%3BAcc:Q9FJH9]	UP
AT2G15880	1.02011	9.24e-26	6.24e-23	58.9033	1228	121.387	2409.67	PEX3	Pollen-specific leucine-rich repeat extensin-like protein 3 [Source:UniProtKB/Swiss-Prot%3BAcc:Q9XIL9]	UP
AT2G19190	1.01904	0.000224222	0.00324805	1.47564	73	3.13379	142.667	SIRK	Senescence-induced receptor-like serine/threonine-protein kinase [Source:UniProtKB/Swiss-Prot%3BAcc:O64483]	UP
AT1G72830	1.01217	7.68e-09	4.82e-07	4.65381	113.667	9.47006	226	HAP2C	Nuclear factor Y%2C subunit A3 [Source:UniProtKB/TrEMBL%3BAcc:F4IEZ6]	UP
AT3G04720	1.00107	0.000203045	0.00299171	129.501	2067.33	260.403	3907	HEL	Hevein-like preproprotein [Source:UniProtKB/Swiss-Prot%3BAcc:P43082]	UP
AT5G14760	-1.01368	1.87e-30	2.08e-27	39.9345	1699	19.8995	839.667	AO	L-aspartate oxidase%2C chloroplastic [Source:UniProtKB/Swiss-Prot%3BAcc:Q94AY1]	DOWN
AT5G10250	-1.018	0.000294041	0.00403086	1.68281	58.3333	0.817598	28.3333	DOT3	Phototropic-responsive NPH3 family protein [Source:TAIR%3BAcc:AT5G10250]	DOWN
AT1G32900	-1.02129	1.82e-17	5.07e-15	42.33	1615.33	21.0609	798	GBSS1	Granule-bound starch synthase 1%2C chloroplastic/amyloplastic [Source:UniProtKB/Swiss-Prot%3BAcc:Q9MAQ0]	DOWN
AT1G01190	-1.0246	1.65e-17	4.66e-15	17.3658	488.667	8.56848	237	CYP78A8	CYP78A8 [Source:UniProtKB/TrEMBL%3BAcc:A0A178WIC4]	DOWN
AT4G35090	-1.03876	1.22e-23	7.22e-21	545.966	15516.3	267.536	7543	CAT2	catalase 2 [Source:TAIR%3BAcc:AT4G35090]	DOWN
AT1G13650	-1.03921	4.8e-06	0.000137666	8.18486	151	4.00334	75.3333	NA	At1g13650 [Source:UniProtKB/TrEMBL%3BAcc:A2RVL9]	DOWN
AT3G46490	-1.04196	4.62e-18	1.41e-15	23.2996	409.667	11.8532	195.333	NA	2-oxoglutarate (2OG) and Fe(II)-dependent oxygenase superfamily protein [Source:UniProtKB/TrEMBL%3BAcc:F4J938]	DOWN
AT1G03055	-1.05083	6.66e-06	0.000181698	6.91463	92.6667	3.32021	44.3333	D27	Beta-carotene isomerase D27%2C chloroplastic [Source:UniProtKB/Swiss-Prot%3BAcc:Q7XA78]	DOWN
AT5G52570	-1.05373	3.19e-15	6.55e-13	22.6728	367.333	11.0209	174.667	BETA-OHASE 2	Beta-carotene 3-hydroxylase 2%2C chloroplastic [Source:UniProtKB/Swiss-Prot%3BAcc:Q9LTG0]	DOWN
AT5G55340	-1.07026	0.00405151	0.0321662	3.04928	44	1.43762	21	AT5	Probable long-chain-alcohol O-fatty-acyltransferase 5 [Source:UniProtKB/Swiss-Prot%3BAcc:Q9FJ76]	DOWN
AT3G21670	-1.07181	1.37e-16	3.42e-14	40.9576	1336.67	19.6705	637	NPF6.4	Protein NRT1/ PTR FAMILY 6.4 [Source:UniProtKB/Swiss-Prot%3BAcc:Q9LVE0]	DOWN
AT5G24420	-1.07237	0.000468553	0.00583987	4.41272	70	2.06726	34	PGL5	Probable 6-phosphogluconolactonase 3 [Source:UniProtKB/Swiss-Prot%3BAcc:Q8LEV7]	DOWN
AT3G24460	-1.08419	1.87e-05	0.000429908	3.56824	95.6667	1.80696	45.3333	NA	AT3g24470/MXP5_4 [Source:UniProtKB/TrEMBL%3BAcc:Q8VZI4]	DOWN
AT4G35640	-1.09133	8.42e-05	0.00151315	3.28623	88	1.56051	40.6667	SAT4	SERAT3 [Source:UniProtKB/TrEMBL%3BAcc:A0A178USX0]	DOWN
AT1G06830	-1.09908	4.75e-08	2.42e-06	26.1897	122.333	12.32	56.3333	GRXS11	Monothiol glutaredoxin-S11 [Source:UniProtKB/Swiss-Prot%3BAcc:Q9M9Y9]	DOWN
AT3G44970	-1.10237	8.3e-06	0.000216037	5.92696	146.667	2.83133	68	NA	Cytochrome P450 superfamily protein [Source:UniProtKB/TrEMBL%3BAcc:F4J4C0]	DOWN
AT2G28100	-1.10688	4.69e-22	2.46e-19	14.6025	475	6.52865	218	FUC1	Alpha-L-fucosidase 1 [Source:UniProtKB/Swiss-Prot%3BAcc:Q8GW72]	DOWN
AT1G16730	-1.10923	2.07e-06	6.57e-05	9.94999	140.333	4.70817	64	UP6	F17F16.6 protein [Source:UniProtKB/TrEMBL%3BAcc:Q9FWQ7]	DOWN
AT1G76620	-1.12186	8.94e-05	0.00159007	3.03031	78	1.38233	35.6667	NA	At1g76620/F14G6_22 [Source:UniProtKB/TrEMBL%3BAcc:Q8W4R7]	DOWN
AT3G18485	-1.13474	0.000516663	0.00632578	3.34915	47.6667	1.49944	21.3333	ILR2	IAA-leucine resistant 2 [Source:UniProtKB/Swiss-Prot%3BAcc:F4J8R4]	DOWN
AT1G67860	-1.14643	5.61e-05	0.00108165	11.2383	64.6667	5.09972	28.6667	NA	At1g67860/T23K23_29 [Source:UniProtKB/TrEMBL%3BAcc:Q9C9V2]	DOWN
AT3G09450	-1.14907	8.39e-08	3.96e-06	3.99863	149.667	1.81614	66	NA	F3L24.34 protein [Source:UniProtKB/TrEMBL%3BAcc:Q9S710]	DOWN
AT1G04880	-1.1513	0.00362772	0.0294328	1.28	33	0.574615	15	HMGB15	High mobility group B protein 15 [Source:UniProtKB/Swiss-Prot%3BAcc:Q9MAT6]	DOWN
AT2G36590	-1.1542	3.86e-13	5.49e-11	10.2643	232.333	4.60129	103.667	PROT3	Proline transporter 3 [Source:UniProtKB/Swiss-Prot%3BAcc:Q9SJP9]	DOWN
AT1G73870	-1.1788	1.29e-17	3.8e-15	25.9503	728.667	11.7686	326.333	COL7	Zinc finger protein CONSTANS-LIKE 7 [Source:UniProtKB/Swiss-Prot%3BAcc:Q9C9A9]	DOWN
AT1G33960	-1.18992	1.71e-10	1.58e-08	5.89983	161	2.60701	69.6667	AIG1	P-loop containing nucleoside triphosphate hydrolases superfamily protein [Source:TAIR%3BAcc:AT1G33960]	DOWN
AT5G49330	-1.19506	0.000621451	0.00726525	2.30842	58.3333	1.06508	24.3333	MYB111	Transcription factor MYB111 [Source:UniProtKB/Swiss-Prot%3BAcc:Q9FJ07]	DOWN
AT5G42760	-1.20589	4.29e-20	1.65e-17	22.4026	414.333	9.70191	179	NA	Leucine carboxyl methyltransferase [Source:UniProtKB/TrEMBL%3BAcc:F4K328]	DOWN
AT1G12030	-1.26541	0.00223269	0.0203996	1.6594	35.3333	0.704431	14.3333	NA	At1g12030 [Source:UniProtKB/TrEMBL%3BAcc:O65376]	DOWN
AT5G55570	-1.28447	2.3e-16	5.48e-14	20.8738	248	8.66066	101	NA	unknown protein%3B LOCATED IN: chloroplast%3B Ha. [Source:TAIR%3BAcc:AT5G55570]	DOWN
AT5G35940	-1.2862	0.0012421	0.0128309	1.61768	45	0.641088	18.3333	JAL41	Jacalin-related lectin 41 [Source:UniProtKB/Swiss-Prot%3BAcc:Q9FGC5]	DOWN
AT5G58770	-1.29499	1.3e-14	2.43e-12	24.838	488	10.346	200.667	NA	Dehydrodolichyl diphosphate synthase 2 [Source:UniProtKB/Swiss-Prot%3BAcc:Q56Y11]	DOWN
AT5G50915	-1.29541	9.81e-07	3.47e-05	3.98863	87.6667	1.68258	35	BHLH137	Transcription factor bHLH137 [Source:UniProtKB/Swiss-Prot%3BAcc:Q93W88]	DOWN
AT3G28270	-1.29828	0.00429237	0.0334064	1.16484	29.6667	0.49321	12.3333	NA	UPF0496 protein At3g28270 [Source:UniProtKB/Swiss-Prot%3BAcc:Q9LHD9]	DOWN
AT5G08000	-1.30824	5.52e-12	6.32e-10	19.9342	217.333	8.09096	86.6667	E13L3	glucan endo-1%2C3-beta-glucosidase-like protein 3 [Source:TAIR%3BAcc:AT5G08000]	DOWN
AT1G06100	-1.32581	0.00220257	0.0201967	2.59412	30.6667	1.02877	12.3333	NA	Delta-9 desaturase-like 2 protein [Source:UniProtKB/Swiss-Prot%3BAcc:Q9LND8]	DOWN
AT1G31690	-1.34155	9.32e-09	5.7e-07	4.22498	167.333	1.691	62.3333	NA	Amine oxidase [Source:UniProtKB/TrEMBL%3BAcc:F4IAX0]	DOWN
AT4G26950	-1.34652	5.94e-05	0.0011356	4.79132	44.3333	1.93616	17	NA	At4g26950 [Source:UniProtKB/TrEMBL%3BAcc:Q9SZ34]	DOWN
AT1G64590	-1.35047	6.42e-12	7.31e-10	11.0293	237	4.34609	90	NA	At1g64590/F1N19_15 [Source:UniProtKB/TrEMBL%3BAcc:Q9SGV6]	DOWN
AT2G29370	-1.35524	0.0034529	0.0284293	1.62469	29	0.641828	11.3333	NA	Tropinone reductase homolog At2g29370 [Source:UniProtKB/Swiss-Prot%3BAcc:Q9ZW20]	DOWN
AT5G53200	-1.36036	0.00266835	0.0234289	4.6055	30.6667	1.75164	12	TRY	TRY [Source:UniProtKB/TrEMBL%3BAcc:A0A178UFU9]	DOWN
AT1G47395	-1.40848	0.0045242	0.0346537	13.0362	27	4.925	10.3333	NA	At1g47390 [Source:UniProtKB/TrEMBL%3BAcc:Q8GUL3]	DOWN
AT1G52770	-1.47608	3.5e-07	1.38e-05	2.34458	63	0.849139	22.3333	NA	At1g52770 [Source:UniProtKB/TrEMBL%3BAcc:Q9C941]	DOWN
AT1G55960	-1.50863	9.22e-35	1.94e-31	51.1947	1393.67	17.9558	496.667	NA	Polyketide cyclase/dehydrase and lipid transport superfamily protein [Source:UniProtKB/TrEMBL%3BAcc:Q93YV2]	DOWN
AT5G38990	-1.51866	0.000170875	0.0026186	14.3627	683.333	5.05418	236.333	NA	Probable receptor-like protein kinase At5g38990 [Source:UniProtKB/Swiss-Prot%3BAcc:Q9FID9]	DOWN
AT2G21590	-1.53146	1.44e-16	3.5e-14	5.29475	188.667	1.85685	64.3333	APL4	Probable glucose-1-phosphate adenylyltransferase large subunit%2C chloroplastic [Source:UniProtKB/Swiss-Prot%3BAcc:Q9SIK1]	DOWN
AT4G30620	-1.57064	3.11e-33	4.53e-30	42.5834	463	14.5634	152	NA	Nucleoid-associated protein At4g30620%2C chloroplastic [Source:UniProtKB/Swiss-Prot%3BAcc:Q9M098]	DOWN
AT3G46700	-1.57919	0.000530686	0.00645565	1.47951	42	0.505177	14	UGT76E3	Glycosyltransferase (Fragment) [Source:UniProtKB/TrEMBL%3BAcc:W8Q6Q0]	DOWN
AT4G11470	-1.62104	0.000248742	0.00354459	0.909587	32	0.30145	10	CRK31	cysteine-rich RLK (RECEPTOR-like protein kinase) 31 [Source:TAIR%3BAcc:AT4G11470]	DOWN
AT2G03020	-1.65673	1.76e-09	1.26e-07	5.23738	78.3333	1.57573	24.6667	NA	Heat shock protein HSP20/alpha crystallin family [Source:UniProtKB/TrEMBL%3BAcc:Q84X24]	DOWN
AT2G27420	-1.73788	1.44e-17	4.17e-15	11.182	279.667	3.36419	84.6667	NA	Cysteine proteinases superfamily protein [Source:UniProtKB/TrEMBL%3BAcc:Q9ZQH7]	DOWN
AT2G15020	-1.74798	8.09e-43	2.55e-39	23.8009	811.667	7.15397	243.667	NA	At2g15020 [Source:UniProtKB/TrEMBL%3BAcc:Q9ZUK9]	DOWN
AT3G56980	-1.76837	1.19e-05	0.000294485	3.61198	38.3333	1.05518	11.3333	ORG3	Transcription factor ORG3 [Source:UniProtKB/Swiss-Prot%3BAcc:Q9M1K0]	DOWN
AT2G44460	-1.77758	7.18e-09	4.54e-07	2.06231	69.6667	0.612784	20	BGLU28	Beta-glucosidase 28 [Source:UniProtKB/Swiss-Prot%3BAcc:Q4V3B3]	DOWN
AT1G14210	-1.85157	8.25e-63	5.2e-59	70.4649	929	19.5538	248.667	NA	Ribonuclease T2 family protein [Source:UniProtKB/TrEMBL%3BAcc:F4HUG9]	DOWN
AT3G42725	-1.89748	0.00285746	0.0247219	2.00064	17	0.553417	4.33333	NA	Putative membrane lipoprotein [Source:UniProtKB/TrEMBL%3BAcc:Q949S3]	DOWN
AT1G07180	-1.90284	3.57e-58	1.69e-54	48.6423	1555.67	13.1771	417.333	NDA1	Internal alternative NAD(P)H-ubiquinone oxidoreductase A1%2C mitochondrial [Source:UniProtKB/Swiss-Prot%3BAcc:Q8GWA1]	DOWN
AT1G26790	-2.00599	0.00153302	0.0151491	1.1005	15.6667	0.272952	4	NA	Dof-type zinc finger DNA-binding family protein [Source:TAIR%3BAcc:AT1G26790]	DOWN
AT5G10140	-2.04332	0.000281614	0.00389936	1.50653	21	0.316797	5	FLC	At5g10140 [Source:UniProtKB/TrEMBL%3BAcc:Q5Q9J1]	DOWN
AT2G14247	-2.12927	1.13e-05	0.000281364	12.6305	35.6667	2.83309	8	NA	Expressed protein [Source:UniProtKB/TrEMBL%3BAcc:Q8GWC0]	DOWN
AT1G47400	-2.15023	0.000781098	0.00878399	4.67692	16.6667	1.06809	3.66667	NA	unknown protein%3B BEST Arabidopsis thaliana protein match is: unknown protein (TAIR:AT1G47395.1)%3B Ha. [Source:TAIR%3BAcc:AT1G47400]	DOWN
AT2G30766	-2.1785	1e-23	6.11e-21	40.8916	212.667	9.2612	47.3333	NA	Putative uncharacterized protein [Source:UniProtKB/TrEMBL%3BAcc:Q56Y35]	DOWN
AT3G21460	-2.43332	0.000333325	0.00447066	2.29436	16	0.422908	3	GRXS10	Monothiol glutaredoxin-S10 [Source:UniProtKB/Swiss-Prot%3BAcc:Q9LIF1]	DOWN
AT5G14730	-5.20746	5.74e-06	0.000160857	1.6255	36.3333	0.00306386	1	NA	At5g14730 [Source:UniProtKB/TrEMBL%3BAcc:Q9LER3]	DOWN
AT3G22980	-5.40083	0.00177995	0.0170803	0.758685	35.6667	0.000391907	1	NA	Ribosomal protein S5/Elongation factor G/III/V family protein [Source:UniProtKB/TrEMBL%3BAcc:F4J2T9]	DOWN
AT4G19690	-5.58006	2.18e-05	0.000489548	1.19811	19	0.0193938	0.333333	IRT1	Fe(2+) transport protein 1 [Source:UniProtKB/Swiss-Prot%3BAcc:Q38856]	DOWN
AT1G01010	0.052971	0.74847	0.89676	5.95162	177.333	6.26588	179.667	NAC001	NAC domain-containing protein 1 [Source:UniProtKB/Swiss-Prot%3BAcc:Q0WV96]	None
AT1G01040	-0.00374968	0.969919	0.990864	9.2593	1169.33	9.33266	1159.33	DCL1	Dicer-like 1 [Source:UniProtKB/TrEMBL%3BAcc:F4HQG6]	None
AT1G01110	0.150764	0.522566	0.768771	2.07678	70.3333	2.48081	76.6667	IQD18	IQ-domain 18 [Source:UniProtKB/TrEMBL%3BAcc:Q9MAM4]	None
AT1G01160	-0.00699881	0.945476	0.981832	22.2132	418.667	22.3539	409.333	GIF2	GRF1-interacting factor 2 [Source:UniProtKB/TrEMBL%3BAcc:F4HQJ3]	None
AT1G01180	0.144497	0.211664	0.481214	18.8109	398.333	20.7997	429.333	NA	S-adenosyl-L-methionine-dependent methyltransferases superfamily protein [Source:UniProtKB/TrEMBL%3BAcc:F4HS78]	None
AT1G01210	-0.274045	0.0432785	0.179062	25.6892	267.667	21.5845	218	NA	DNA-directed RNA polymerase subunit [Source:UniProtKB/TrEMBL%3BAcc:Q9LNK0]	None
AT1G01220	0.0697406	0.499633	0.751277	8.66769	520	9.16029	539.667	FKGP	Bifunctional fucokinase/fucose pyrophosphorylase [Source:UniProtKB/Swiss-Prot%3BAcc:Q9LNJ9]	None
AT1G01225	0.100001	0.364257	0.644689	42.9452	475.333	46.844	496	NA	At1g01225 [Source:UniProtKB/TrEMBL%3BAcc:Q29PY0]	None
AT1G01240	0.30207	0.0133499	0.077891	11.5843	267	14.6763	322	NA	At1g01240/F6F3_11 [Source:UniProtKB/TrEMBL%3BAcc:Q9LNJ7]	None
AT1G01260	0.0227258	0.869887	0.953571	5.42045	243.333	5.54858	245.333	BHLH13	Transcription factor bHLH13 [Source:UniProtKB/Swiss-Prot%3BAcc:Q9LNJ5]	None
AT1G01290	-0.252891	0.0750762	0.259269	13.9752	225	11.793	186	CNX3	Cyclic pyranopterin monophosphate synthase%2C mitochondrial [Source:UniProtKB/Swiss-Prot%3BAcc:Q39056]	None
AT1G01300	-0.409677	2.83405e-07	1.16721e-05	75.9736	2158	56.962	1602	APF2	Aspartyl protease family protein 2 [Source:UniProtKB/Swiss-Prot%3BAcc:Q9LNJ3]	None
AT1G01310	-1.01308	0.681482	NA	0.0422083	0.666667	0.0177327	0.333333	NA	At1g01310 [Source:UniProtKB/TrEMBL%3BAcc:Q6ID87]	None
AT1G01350	-0.0675409	0.58012	0.804888	12.1929	306.667	11.9307	286.333	NA	Zinc finger CCCH domain-containing protein 1 [Source:UniProtKB/Swiss-Prot%3BAcc:Q8GX84]	None
AT1G01355	0.956163	0.317732	NA	0.361661	3.33333	0.725101	6	NA	Putative endonuclease or glycosyl hydrolase [Source:UniProtKB/TrEMBL%3BAcc:F4HSA3]	None
AT1G01360	-0.0899979	0.533846	0.774661	14.9308	223	14.3298	204.667	PYL9	RCAR1 [Source:UniProtKB/TrEMBL%3BAcc:A0A178W4H4]	None
AT1G01370	0.0367937	0.882413	0.958686	4.60153	59.6667	4.61425	60.6667	HTR12	Histone H3-like centromeric protein HTR12 [Source:UniProtKB/Swiss-Prot%3BAcc:Q8RVQ9]	None
AT1G01380	0.503339	0.293273	0.575166	1.93476	13	2.80589	18	ETC1	MYB-like transcription factor ETC1 [Source:UniProtKB/Swiss-Prot%3BAcc:Q9LNI5]	None
AT1G01480	0.452807	0.211947	0.481697	0.814815	26.6667	1.14557	35.3333	ACS2	1-aminocyclopropane-1-carboxylate synthase 2 [Source:UniProtKB/Swiss-Prot%3BAcc:Q06402]	None
AT1G01500	0.421383	0.000680981	0.00787849	9.59412	225.333	12.9755	297.667	NA	Uncharacterized protein At1g01500 [Source:UniProtKB/Swiss-Prot%3BAcc:Q8GUH2]	None
AT1G01510	0.221432	0.0130367	0.0767505	21.9786	846	25.858	972.667	AN	C-terminal binding protein AN [Source:UniProtKB/Swiss-Prot%3BAcc:O23702]	None
AT1G01520	-1.31319	0.0128857	0.0760509	1.6305	18.3333	0.659169	7.33333	NA	ASG4 [Source:UniProtKB/TrEMBL%3BAcc:A0A384LJW3]	None
AT1G01540	-0.278376	0.000233773	0.00336571	41.9811	1618	35.0156	1325	NA	Probable serine/threonine-protein kinase At1g01540 [Source:UniProtKB/Swiss-Prot%3BAcc:Q3EDL4]	None
AT1G01550	0.0298583	0.667906	0.855868	116.939	2220.67	119.872	2230	BPS1	Protein BPS1%2C chloroplastic [Source:UniProtKB/Swiss-Prot%3BAcc:Q9LMM6]	None
AT1G01560	-0.30742	0.630128	0.834971	0.546952	12.3333	0.460484	9.33333	MPK11	Mitogen-activated protein kinase 11 [Source:UniProtKB/Swiss-Prot%3BAcc:Q9LMM5]	None
AT1G01570	0.55759	0.114224	0.335086	1.16416	26.6667	1.73458	38.3333	NA	F22L4.11 protein [Source:UniProtKB/TrEMBL%3BAcc:Q9LMM4]	None
AT1G01580	0.760926	0.0291014	0.135902	0.576339	21	0.974061	35.3333	FRO2	ferric reduction oxidase 2 [Source:TAIR%3BAcc:AT1G01580]	None
AT1G01590	0.264158	0.778538	NA	0.173697	5	0.203642	6.33333	FRO1	Probable ferric reduction oxidase 1 [Source:UniProtKB/Swiss-Prot%3BAcc:Q9LMM2]	None
AT1G01600	-0.0247154	0.857683	0.94851	7.62203	304	7.59098	289	CYP86A4	Cytochrome P450 86A4 [Source:UniProtKB/Swiss-Prot%3BAcc:Q9LMM1]	None
AT1G01630	-0.0655228	0.408907	0.680981	53.9363	1113.33	52.3227	1036	NA	Polyphosphoinositide binding protein%2C putative [Source:UniProtKB/TrEMBL%3BAcc:Q9LQ96]	None
AT1G01690	-0.0808706	0.666324	0.8547	3.90348	117.333	3.78847	107.333	ATPRD3	Putative recombination initiation defects 3 [Source:UniProtKB/TrEMBL%3BAcc:F4HU48]	None
AT1G01695	0.379584	0.762339	NA	0.126091	2.66667	0.178583	3.33333	NA	TRM33 [Source:UniProtKB/TrEMBL%3BAcc:A0A178WAP9]	None
AT1G01710	0.112119	0.221414	0.49388	13.423	586.333	14.6022	626.667	NA	Acyl-CoA thioesterase II [Source:UniProtKB/TrEMBL%3BAcc:F4HU51]	None
AT1G01720	0.0104033	0.893195	0.96289	46.5254	1074	46.9736	1061.33	NAC002	NAC domain-containing protein 2 [Source:UniProtKB/Swiss-Prot%3BAcc:Q39013]	None
AT1G01730	0.166874	0.180538	0.43952	22.5868	289	25.8651	318.667	NA	T1N6.14 protein [Source:UniProtKB/TrEMBL%3BAcc:Q9LQ83]	None
AT1G01750	0.348949	0.135887	0.371591	11.7473	117	15.2534	142.667	ADF11	actin depolymerizing factor 11 [Source:TAIR%3BAcc:AT1G01750]	None
AT1G01770	0.279076	0.00167859	0.0163147	21.3629	747	27.011	897	NA	Propionyl-CoA carboxylase [Source:UniProtKB/TrEMBL%3BAcc:Q8GZ85]	None
AT1G01790	-0.475219	2.82404e-07	1.16563e-05	74.0944	3707.33	52.4659	2656.33	KEA1	K(+) efflux antiporter 1%2C chloroplastic [Source:UniProtKB/Swiss-Prot%3BAcc:Q9ZTZ7]	None
AT1G01800	0.10815	0.116972	0.340294	83.4723	1428.67	91.2668	1509.33	NA	AT1G01800 protein [Source:UniProtKB/TrEMBL%3BAcc:Q94K30]	None
AT1G01810	-0.195133	0.730587	0.887497	1.2574	12	1.12165	10.3333	NA	T1N6.23 [Source:UniProtKB/TrEMBL%3BAcc:Q9LQ74]	None
AT1G01840	-0.310974	0.533088	0.774531	1.39072	18.6667	1.13195	15.3333	NA	AP2-like ethylene-responsive transcription factor SNZ [Source:UniProtKB/TrEMBL%3BAcc:Q9LQ71]	None
AT1G01900	-0.267656	0.0423346	0.176509	5.85361	274.667	4.88276	224.667	SBTI1.1	SBTI1.1 [Source:UniProtKB/TrEMBL%3BAcc:A0A178W900]	None
AT1G01920	0.248228	0.0522148	0.203733	8.15802	262.667	9.82807	306	NA	SET domain-containing protein [Source:UniProtKB/TrEMBL%3BAcc:F4HU79]	None
AT1G01940	-0.346196	0.0259067	0.125189	23.3445	247	18.5991	189.333	CYP18-1	Peptidyl-prolyl cis-trans isomerase CYP18-1 [Source:UniProtKB/Swiss-Prot%3BAcc:Q9LPC7]	None
AT1G01950	-0.0420072	0.681739	0.863097	8.8271	515.333	8.68374	495.333	ARK2	Kinesin-like protein [Source:UniProtKB/TrEMBL%3BAcc:F4HU83]	None
AT1G01970	-0.29632	0.000913385	0.00998071	25.5222	733.667	21.0426	588.667	NA	Pentatricopeptide repeat-containing protein At1g01970 [Source:UniProtKB/Swiss-Prot%3BAcc:Q9LPC4]	None
AT1G02000	-0.0342402	0.781764	0.915132	10.6843	336	10.4983	321.333	GAE2	UDP-glucuronate 4-epimerase 2 [Source:UniProtKB/Swiss-Prot%3BAcc:Q9LPC1]	None
AT1G02010	0.394577	0.00393067	0.0313657	4.79842	217.333	6.36507	283	SEC1A	secretory 1A [Source:TAIR%3BAcc:AT1G02010]	None
AT1G02065	0.171882	0.504938	0.755489	2.07713	54	2.3272	60	SPL8	Squamosa promoter-binding-like protein 8 [Source:UniProtKB/Swiss-Prot%3BAcc:Q8GXL3]	None
AT1G02080	0.0403247	0.651547	0.848151	19.4753	2404.67	20.0857	2440	NA	Transcription regulator [Source:UniProtKB/TrEMBL%3BAcc:F4HVV6]	None
AT1G02100	0.187368	0.0333452	0.150659	36.1749	1695.33	42.3895	1915.67	LCMT1	Leucine carboxyl methyltransferase 1 homolog [Source:UniProtKB/Swiss-Prot%3BAcc:Q8VY08]	None
AT1G02120	0.106777	0.1082	0.324687	38.9042	1671.67	42.7792	1777.67	VAD1	Protein VASCULAR ASSOCIATED DEATH 1%2C chloroplastic [Source:UniProtKB/Swiss-Prot%3BAcc:F4HVW5]	None
AT1G02145	-0.26177	2.05489e-05	0.000465774	94.3962	3489.67	76.7205	2861.67	ALG12	Dol-P-Man:Man(7)GlcNAc(2)-PP-Dol alpha-1%2C6-mannosyltransferase [Source:UniProtKB/Swiss-Prot%3BAcc:A8MR93]	None
AT1G02160	-0.00602334	0.964421	0.988635	47.7495	325.333	48.0827	317.333	NA	Cox19 family protein (CHCH motif) [Source:UniProtKB/TrEMBL%3BAcc:A8MQS6]	None
AT1G02170	0.0972685	0.271323	0.552308	35.3339	734	37.6704	766.333	AMC1	MCP1b [Source:UniProtKB/TrEMBL%3BAcc:A0A178W8H4]	None
AT1G02190	1.07025	0.228166	NA	0.0783539	3	0.169275	6.33333	NA	Protein CER1-like 1 [Source:UniProtKB/Swiss-Prot%3BAcc:F4HVX7]	None
AT1G02205	-0.382248	0.0108764	0.0670824	10.8409	414	8.33181	310.333	CER1	Fatty acid hydroxylase superfamily [Source:TAIR%3BAcc:AT1G02205]	None
AT1G02300	0.329564	9.01363e-06	0.000232778	100.131	2268.33	125.856	2776.33	CATHB1	Cathepsin B-like protease 1 [Source:UniProtKB/Swiss-Prot%3BAcc:F4HVZ1]	None
AT1G02350	0.139744	0.347152	0.629007	10.9528	250	12.4143	266	NA	Protoporphyrinogen oxidase-like protein [Source:UniProtKB/TrEMBL%3BAcc:F4HVZ8]	None
AT1G02370	-0.399433	0.0243261	0.119595	4.49304	142.667	3.4813	105.667	NA	Pentatricopeptide repeat-containing protein At1g02370%2C mitochondrial [Source:UniProtKB/Swiss-Prot%3BAcc:Q9FZ24]	None
AT1G02380	-0.165938	0.677493	0.860997	1.47583	24.6667	1.31976	22	NA	T6A9.7 protein [Source:UniProtKB/TrEMBL%3BAcc:Q9FZ23]	None
AT1G02390	0.945654	0.105923	0.320995	0.419407	11.6667	0.845944	20.6667	GPAT2	Probable glycerol-3-phosphate acyltransferase 2 [Source:UniProtKB/Swiss-Prot%3BAcc:Q9FZ22]	None
AT1G02400	0.557181	0.00421784	0.0330161	5.1117	100	7.51134	146.667	GA2OX6	Gibberellin 2-beta-dioxygenase 6 [Source:UniProtKB/Swiss-Prot%3BAcc:Q9FZ21]	None
AT1G02410	-0.051268	0.660321	0.851887	19.5464	342	18.9687	323.667	COX11	Cytochrome c oxidase assembly protein COX11%2C mitochondrial [Source:UniProtKB/Swiss-Prot%3BAcc:Q8GWR0]	None
AT1G02420	0.0362036	0.934593	0.977349	1.16852	28	1.18003	30.3333	NA	Putative pentatricopeptide repeat-containing protein At1g02420 [Source:UniProtKB/Swiss-Prot%3BAcc:Q9FZ19]	None
AT1G02500	0.0682916	0.280842	0.563331	437.712	11225.3	461.167	11548	SAM1	S-adenosylmethionine synthase [Source:UniProtKB/TrEMBL%3BAcc:A0A178WES1]	None
AT1G02520	0.108043	0.506185	0.756795	2.89658	225	3.19224	235.667	ABCB11	ABC transporter B family member 11 [Source:UniProtKB/Swiss-Prot%3BAcc:Q9FWX7]	None
AT1G02530	0.0381511	0.960872	NA	0.0821818	6.66667	0.0866643	6.66667	ABCB12	PGP12 [Source:UniProtKB/TrEMBL%3BAcc:A0A178WBY9]	None
AT1G02560	-0.126461	0.038097	0.164539	267.326	5278.33	247.265	4742	CLPP5	ATP-dependent Clp protease proteolytic subunit [Source:UniProtKB/TrEMBL%3BAcc:A0A178WMF0]	None
AT1G02570	0.358972	0.556138	0.788938	0.890396	10.6667	1.15462	13.3333	NA	Transmembrane protein [Source:UniProtKB/TrEMBL%3BAcc:Q1PFZ3]	None
AT1G02575	0.0492876	0.970555	NA	0.139646	1.66667	0.150363	1.66667	NA	unknown protein%3B BEST Arabidopsis thaliana protein match is: unknown protein (TAIR:AT1G02570.1). [Source:TAIR%3BAcc:AT1G02575]	None
AT1G02580	0.876555	0.408313	NA	0.0489584	2.33333	0.100026	4	MEA	Histone-lysine N-methyltransferase MEDEA [Source:UniProtKB/Swiss-Prot%3BAcc:O65312]	None
AT1G02620	2.8824	0.00147078	NA	0.187671	1.66667	1.54899	11.6667	NA	Ras-related small GTP-binding family protein [Source:UniProtKB/TrEMBL%3BAcc:Q3E6Q3]	None
AT1G02640	0.340204	0.000990451	0.0106504	14.3314	738.667	18.2169	914	BXL2	Probable beta-D-xylosidase 2 [Source:UniProtKB/Swiss-Prot%3BAcc:Q94KD8]	None
AT1G02650	0.0477436	0.8714	0.954063	1.6907	41	1.75574	41.3333	NA	T14P4.7 protein [Source:UniProtKB/TrEMBL%3BAcc:Q9FWY3]	None
AT1G02670	-0.0694288	0.851303	0.945721	0.700982	31	0.682618	29	NA	P-loop containing nucleoside triphosphate hydrolases superfamily protein [Source:TAIR%3BAcc:AT1G02670]	None
AT1G02680	-0.0827915	0.617782	0.828032	11.4403	149	10.9955	138	TAF13	Transcription initiation factor TFIID subunit 13 [Source:UniProtKB/Swiss-Prot%3BAcc:Q6NQH4]	None
AT1G02690	-0.1281	0.289908	0.571825	9.28381	312.333	8.56644	282	IMPA-6	Importin subunit alpha [Source:UniProtKB/TrEMBL%3BAcc:F4HXL3]	None
AT1G02700	-0.518758	0.0207928	0.107016	3.09157	92	2.15435	64	NA	GATA transcription factor-like protein [Source:UniProtKB/TrEMBL%3BAcc:Q9FWY8]	None
AT1G02720	-0.0535503	0.736782	0.891272	9.33936	219	8.951	212	GATL5	Probable galacturonosyltransferase-like 5 [Source:UniProtKB/Swiss-Prot%3BAcc:Q9FWY9]	None
AT1G02750	-0.14065	0.446945	0.712099	11.1389	149	10.2016	133.667	DI19-2	Protein DEHYDRATION-INDUCED 19 homolog 2 [Source:UniProtKB/Swiss-Prot%3BAcc:Q8GWK1]	None
AT1G02810	0.405113	0.0131817	0.0771952	8.3337	280.333	11.0801	364	PME7	Probable pectinesterase/pectinesterase inhibitor 7 [Source:UniProtKB/Swiss-Prot%3BAcc:Q9SRX4]	None
AT1G02813	-2.36952	0.287755	NA	0.300257	2	0.0580987	0.333333	NA	Protein of unknown function%2C DUF538 [Source:TAIR%3BAcc:AT1G02813]	None
AT1G02816	-0.0487941	0.709248	0.87666	26.4294	321.667	26.0382	299.667	NA	F22D16.19 protein [Source:UniProtKB/TrEMBL%3BAcc:Q9SRX5]	None
AT1G02840	0.0571738	0.459033	0.720548	108.91	2571	114.415	2645.33	SR34	Serine/arginine-rich-splicing factor SR34 [Source:UniProtKB/Swiss-Prot%3BAcc:O22315]	None
AT1G02850	0.260637	0.011893	0.0719673	20.2404	617.333	24.5587	726.667	BGLU11	Beta-glucosidase 11 [Source:UniProtKB/Swiss-Prot%3BAcc:B3H5Q1]	None
AT1G02860	-0.0198097	0.892834	0.962887	10.8001	246.667	10.8127	237.667	BAH1	E3 ubiquitin-protein ligase BAH1 [Source:UniProtKB/Swiss-Prot%3BAcc:Q9SRX9]	None
AT1G02970	0.123162	0.637427	0.839615	1.71567	56.6667	1.89516	60	WEE1	Wee1-like protein kinase [Source:UniProtKB/Swiss-Prot%3BAcc:Q8L4H0]	None
AT1G02980	1.8489	0.351389	NA	0.00631873	0.333333	0.0318522	1.33333	CUL2	Cullin-2 [Source:UniProtKB/Swiss-Prot%3BAcc:Q9SRZ0]	None
AT1G03010	0.788411	0.0484131	0.193489	0.682705	20	1.17766	34.3333	NA	BTB/POZ domain-containing protein At1g03010 [Source:UniProtKB/Swiss-Prot%3BAcc:Q9SA69]	None
AT1G03030	0.0248912	0.842094	0.941557	13.5748	296.667	13.8965	295.667	NA	At1g03030 [Source:UniProtKB/TrEMBL%3BAcc:Q500U9]	None
AT1G03050	-0.964899	0.77275	NA	0.00676397	0.333333	0	0	NA	Putative clathrin assembly protein At1g03050 [Source:UniProtKB/Swiss-Prot%3BAcc:Q9SA65]	None
AT1G03070	0.384221	0.285068	0.56715	1.80612	22.3333	2.4047	28.6667	LFG4	Protein LIFEGUARD 4 [Source:UniProtKB/Swiss-Prot%3BAcc:Q9SA63]	None
AT1G03090	0.714586	3.14874e-15	6.54107e-13	13.1287	696	21.7804	1117	MCCA	Methylcrotonoyl-CoA carboxylase subunit alpha%2C mitochondrial [Source:UniProtKB/Swiss-Prot%3BAcc:Q42523]	None
AT1G03110	-0.349353	0.0164604	0.0906928	9.8115	255	7.69395	198	TRM82	tRNA (guanine-N(7)-)-methyltransferase non-catalytic subunit [Source:UniProtKB/TrEMBL%3BAcc:A0A178VZV6]	None
AT1G03120	0.0324917	0.966314	NA	0.820977	6	0.852551	6	ATRAB28	Late embryogenesis abundant protein 3 [Source:UniProtKB/Swiss-Prot%3BAcc:Q9SA57]	None
AT1G03150	-0.0542026	0.687751	0.864921	21.9496	234.667	21.4175	222.333	NAA20	N-terminal acetyltransferase B complex catalytic subunit NAA20 [Source:UniProtKB/Swiss-Prot%3BAcc:Q8LGI8]	None
AT1G03160	0.0297748	0.725907	0.885084	22.5267	1113	23.0247	1121.67	FZL	Probable transmembrane GTPase FZO-like%2C chloroplastic [Source:UniProtKB/Swiss-Prot%3BAcc:Q1KPV0]	None
AT1G03170	1.15967	0.226557	NA	0.183851	3	0.42991	6.33333	FAF2	Protein FANTASTIC FOUR 2 [Source:UniProtKB/Swiss-Prot%3BAcc:Q8GXU9]	None
AT1G03180	0.0952319	0.728294	0.886121	3.0954	50.6667	3.37329	52	NA	Non-structural protein [Source:UniProtKB/TrEMBL%3BAcc:Q5Q0J3]	None
AT1G03190	0.0522293	0.700916	0.872381	4.94489	240	5.1542	245.667	XPD	UVH6 [Source:UniProtKB/TrEMBL%3BAcc:A0A178W4P7]	None
AT1G03200	0.411919	0.00129101	0.013192	19.3247	256.333	25.7207	332	NA	At1g03200 [Source:UniProtKB/TrEMBL%3BAcc:B6IDH7]	None
AT1G03220	0.22455	0.0206164	0.106455	131.097	3122.67	153.458	3514.33	NA	Eukaryotic aspartyl protease family protein [Source:UniProtKB/TrEMBL%3BAcc:Q9ZVS4]	None
AT1G03230	-0.238729	0.013333	0.0778162	55.2985	1236.33	46.7977	1015.33	NA	Eukaryotic aspartyl protease family protein [Source:UniProtKB/TrEMBL%3BAcc:Q9ZVS5]	None
AT1G03270	0.192596	0.446535	0.711885	2.24496	62.6667	2.6008	69.3333	CBSDUF4	Putative DUF21 domain-containing protein At1g03270 [Source:UniProtKB/Swiss-Prot%3BAcc:Q9ZVS8]	None
AT1G03280	-0.0170931	0.836414	0.939822	19.1062	767.333	19.2468	744.667	NA	TFIIE-alpha 1 [Source:UniProtKB/TrEMBL%3BAcc:Q93ZW3]	None
AT1G03290	0.0875724	0.480509	0.737227	10.8744	364.667	11.9051	382	NA	ELKS/Rab6-interacting/CAST family protein [Source:UniProtKB/TrEMBL%3BAcc:Q9ZVT0]	None
AT1G03310	0.0588251	0.5022	0.753561	19.1708	955	20.2127	982	ISA2	ISA2 [Source:UniProtKB/TrEMBL%3BAcc:A0A178WGA8]	None
AT1G03320	-1.03136	0.224433	NA	0.576408	7.33333	0.299448	3.33333	NA	F15K9.8 [Source:UniProtKB/TrEMBL%3BAcc:Q9ZVT3]	None
AT1G03340	-0.589068	0.124984	0.353591	1.61545	28.3333	1.08397	18.6667	NA	F15K9.6 [Source:UniProtKB/TrEMBL%3BAcc:Q9ZVT5]	None
AT1G03360	-0.176868	0.296971	0.578811	7.67158	162.333	6.81447	143.667	RRP4	RRP4 [Source:UniProtKB/TrEMBL%3BAcc:A0A178W3N1]	None
AT1G03365	0.0853185	0.433557	0.701708	6.45577	335	6.96269	350.333	RF4	Putative E3 ubiquitin-protein ligase RF4 [Source:UniProtKB/Swiss-Prot%3BAcc:Q9ZVT8]	None
AT1G03370	0.105841	0.290046	0.571825	9.00727	612	9.84339	643.333	NA	C2 and GRAM domain-containing protein At1g03370 [Source:UniProtKB/Swiss-Prot%3BAcc:Q9ZVT9]	None
AT1G03380	0.149883	0.109658	0.327535	16.4747	1115	18.3996	1219.33	ATG18G	Autophagy-related protein 18g [Source:UniProtKB/Swiss-Prot%3BAcc:Q8GUL1]	None
AT1G03430	0.137543	0.426883	0.695795	13.8706	174.333	15.3953	189	AHP5	histidine-containing phosphotransfer factor 5 [Source:TAIR%3BAcc:AT1G03430]	None
AT1G03440	-0.385443	0.00011807	0.00194934	28.1782	590	21.4293	445	NA	Leucine-rich repeat (LRR) family protein [Source:UniProtKB/TrEMBL%3BAcc:F4I0W7]	None
AT1G03495	0.00996163	0.948044	0.982718	7.47747	227.333	7.3283	230.333	NA	HXXXD-type acyl-transferase family protein [Source:TAIR%3BAcc:AT1G03495]	None
AT1G03540	0.114525	0.929041	0.975596	0.327713	12.6667	0.343527	13	PCMP-E4	Pentatricopeptide repeat-containing protein At1g03540 [Source:UniProtKB/Swiss-Prot%3BAcc:Q9LR69]	None
AT1G03600	-0.22954	2.2203e-05	0.000497895	707.039	7179	605.709	6017	PSB27-1	Photosystem II repair protein PSB27-H1%2C chloroplastic [Source:UniProtKB/Swiss-Prot%3BAcc:Q9LR64]	None
AT1G03610	0.0479672	0.666809	0.854892	16.0945	390.667	16.8914	396.333	NA	Plant/protein (DUF789) [Source:UniProtKB/TrEMBL%3BAcc:Q8LF98]	None
AT1G03630	-0.325536	1.89909e-06	6.09513e-05	115.7	2652.67	93.2745	2097.67	PORC	Protochlorophyllide reductase C%2C chloroplastic [Source:UniProtKB/Swiss-Prot%3BAcc:O48741]	None
AT1G03687	-0.222434	0.105961	0.321007	10.115	253	8.74847	214.667	NA	DTW domain-containing protein [Source:UniProtKB/TrEMBL%3BAcc:F4I2G3]	None
AT1G03700	0.588823	0.0957429	0.302309	3.27778	26.6667	5.04983	38.6667	NA	CASP-like protein 1C2 [Source:UniProtKB/Swiss-Prot%3BAcc:Q9LR57]	None
AT1G03710	1.52876	0.148129	NA	0.0981059	1.66667	0.310851	4.66667	NA	Cystatin/monellin superfamily protein [Source:UniProtKB/TrEMBL%3BAcc:Q58G57]	None
AT1G03740	0.287382	0.00373927	0.0301695	11.5756	632.667	14.3897	759.667	NA	F21B7.34 [Source:UniProtKB/TrEMBL%3BAcc:Q9LR53]	None
AT1G03750	0.1811	0.32081	0.602602	2.19847	110.667	2.52821	123.667	SWI2	Switch 2 [Source:UniProtKB/Swiss-Prot%3BAcc:F4I2H2]	None
AT1G03770	0.617013	0.00176346	0.0169651	2.51672	87.3333	3.87685	133.667	RING1B	RING 1B [Source:UniProtKB/TrEMBL%3BAcc:F4I2H4]	None
AT1G03790	0.272434	0.702932	0.873651	0.374836	7.66667	0.44817	9.33333	SOM	Zinc finger CCCH domain-containing protein 2 [Source:UniProtKB/Swiss-Prot%3BAcc:Q9ZWA1]	None
AT1G03810	0.958681	0.814255	NA	0	0	0.07685	0.333333	NA	F11M21.26 protein [Source:UniProtKB/TrEMBL%3BAcc:Q9ZWA3]	None
AT1G03880	0.960558	0.617802	NA	0.0283341	1	0.0602417	1.66667	CRB	CRU2 [Source:UniProtKB/TrEMBL%3BAcc:A0A178W5K4]	None
AT1G03900	0.159204	0.0225626	0.113952	77.3861	1701.33	87.963	1858.67	ATNAP4	NAP4 [Source:UniProtKB/TrEMBL%3BAcc:A0A178WMR3]	None
AT1G03905	0.351533	0.136811	0.373305	3.64531	79.6667	4.80473	98.6667	ABCI19	ABC transporter I family member 19 [Source:UniProtKB/Swiss-Prot%3BAcc:Q3EDJ0]	None
AT1G03910	0.12025	0.141319	0.380609	20.6531	1017.67	23.0966	1081.33	CTN	Cactin [Source:UniProtKB/Swiss-Prot%3BAcc:F4I2J8]	None
AT1G03920	0.149038	0.540818	0.779084	1.76759	61.6667	1.9726	68	NA	Non-specific serine/threonine protein kinase [Source:UniProtKB/TrEMBL%3BAcc:F4I2K0]	None
AT1G03930	-0.164354	0.0866688	0.283998	15.4947	610	13.9304	536	CKL9	Casein kinase 1-like protein 9 [Source:UniProtKB/Swiss-Prot%3BAcc:Q9ZWB3]	None
AT1G03960	0.281962	0.0651986	0.235798	4.6446	167.667	5.61302	203.333	B''EPSILON	Probable serine/threonine protein phosphatase 2A regulatory subunit B''epsilon [Source:UniProtKB/Swiss-Prot%3BAcc:Q84JI6]	None
AT1G03970	0.163501	0.402251	0.675804	5.44139	108.667	6.24052	119.667	GBF4	At1g03970 [Source:UniProtKB/TrEMBL%3BAcc:Q2HIT6]	None
AT1G03990	-0.00337355	0.995116	0.998497	0.466831	23.3333	0.476116	22.6667	FAO1	Long-chain-alcohol oxidase FAO1 [Source:UniProtKB/Swiss-Prot%3BAcc:Q9ZWB9]	None
AT1G04020	-0.234086	0.127301	0.357553	4.94936	205.667	4.28265	170	ATBARD1	ROW1 [Source:UniProtKB/TrEMBL%3BAcc:A0A384KH31]	None
AT1G04030	-0.00947721	0.96012	0.986741	3.47329	109.667	3.46973	108.333	NA	unknown protein%3B BEST Arabidopsis thaliana protein match is: unknown protein (TAIR:AT5G44040.1)%3B Ha. [Source:TAIR%3BAcc:AT1G04030]	None
AT1G04080	-0.0721762	0.299734	0.581584	37.3771	2026	35.0777	1903.67	PRP39	Tetratricopeptide repeat (TPR)-like superfamily protein [Source:UniProtKB/TrEMBL%3BAcc:F4I448]	None
AT1G04090	0.067585	0.695733	0.869178	4.29935	126.333	4.42049	130.333	NA	At1g04090 [Source:UniProtKB/TrEMBL%3BAcc:Q501D1]	None
AT1G04130	-0.125442	0.512958	0.761714	6.61076	151	6.15876	134.667	TPR2	Tetratricopeptide repeat (TPR)-like superfamily protein [Source:UniProtKB/TrEMBL%3BAcc:F4I456]	None
AT1G04160	0.0634858	0.638449	0.840183	3.75747	234	4.02777	241.333	XI-B	Myosin-8 [Source:UniProtKB/Swiss-Prot%3BAcc:F4I460]	None
AT1G04170	-0.302882	5.41444e-06	0.000152996	72.4712	2173.67	59.2092	1733.33	EIF2 GAMMA	Eukaryotic translation initiation factor 2 gamma subunit [Source:UniProtKB/TrEMBL%3BAcc:O64490]	None
AT1G04180	0.502057	0.14101	0.379978	1.23351	28.6667	1.75882	40	YUC9	Flavin-containing monooxygenase [Source:UniProtKB/TrEMBL%3BAcc:A0A178WB22]	None
AT1G04200	0.16986	0.132814	0.367332	11.1074	457.667	12.5972	506.667	NA	Dyggve-melchior-clausen syndrome protein [Source:UniProtKB/TrEMBL%3BAcc:Q8RWV1]	None
AT1G04210	-0.153728	0.0553692	0.211284	15.1247	1012	13.6828	902.333	NA	At1g04210 [Source:UniProtKB/TrEMBL%3BAcc:O64486]	None
AT1G04230	0.219672	0.134042	0.368732	7.4886	178.667	8.72088	205	NA	At1g04230 [Source:UniProtKB/TrEMBL%3BAcc:Q94K10]	None
AT1G04250	0.0532666	0.485209	0.740245	75.204	1378	79.5119	1403.33	IAA17	Auxin-responsive protein IAA17 [Source:UniProtKB/Swiss-Prot%3BAcc:P93830]	None
AT1G04350	-0.527602	1.33194e-08	7.86845e-07	58.6084	1027.33	40.7819	708.333	NA	1-aminocyclopropane-1-carboxylate oxidase homolog 6 [Source:UniProtKB/Swiss-Prot%3BAcc:P93824]	None
AT1G04370	0.585566	0.758161	NA	0.197117	1	0.280897	1.66667	ERF14	Uncharacterized protein At1g04370 (Fragment) [Source:UniProtKB/TrEMBL%3BAcc:C0SUS6]	None
AT1G04420	-0.276328	0.00013094	0.00212653	81.275	2109	67.819	1717.33	NA	NAD(P)-linked oxidoreductase superfamily protein [Source:UniProtKB/TrEMBL%3BAcc:Q8VZ23]	None
AT1G04430	0.213126	0.00359515	0.0292817	50.5069	2013.67	59.2256	2295	NA	Probable methyltransferase PMT8 [Source:UniProtKB/Swiss-Prot%3BAcc:Q940J9]	None
AT1G04440	0.107536	0.183027	0.442452	32.9437	1008	36.0156	1067.33	CKL13	Casein kinase 1-like protein 13 [Source:UniProtKB/Swiss-Prot%3BAcc:Q5XF24]	None
AT1G04445	-1.76778	0.18606	NA	0.662506	3.33333	0.184839	1	NA	C2H2-like zinc finger protein [Source:TAIR%3BAcc:AT1G04445]	None
AT1G04480	-0.248635	0.00451845	0.0346378	581.704	3819	498.562	3140.67	RPL23A	60S ribosomal protein L23 [Source:UniProtKB/Swiss-Prot%3BAcc:P49690]	None
AT1G04510	-0.244905	0.00188241	0.0178832	34.4076	1157	29.0962	957	PRP19A	Pre-mRNA-processing factor 19 homolog 1 [Source:UniProtKB/Swiss-Prot%3BAcc:Q94BR4]	None
AT1G04520	-0.543181	2.02462e-05	0.000460018	15.0407	338.333	10.4542	229.667	CRRSP3	Cysteine-rich repeat secretory protein 3 [Source:UniProtKB/Swiss-Prot%3BAcc:Q6NM73]	None
AT1G04540	0.542356	0.0608862	0.225023	1.43542	41	2.11036	59	NA	Calcium-dependent lipid-binding (CaLB domain) family protein [Source:UniProtKB/TrEMBL%3BAcc:F4I5P7]	None
AT1G04550	-0.381521	7.77434e-05	0.00141859	29.4435	585.333	22.9729	445	IAA12	Auxin-responsive protein IAA12 [Source:UniProtKB/Swiss-Prot%3BAcc:Q38830]	None
AT1G04555	0.144175	0.520643	0.767425	5.84937	76.3333	6.59984	82.3333	NA	Transmembrane protein [Source:UniProtKB/TrEMBL%3BAcc:Q1G3F4]	None
AT1G04600	0.38149	0.45857	0.72036	0.120817	12.3333	0.157367	16.3333	XI-A	Myosin-7 [Source:UniProtKB/Swiss-Prot%3BAcc:F4I5Q6]	None
AT1G04610	0.0788564	0.791684	0.919441	1.4126	45	1.52008	46.3333	YUC3	Probable indole-3-pyruvate monooxygenase YUCCA3 [Source:UniProtKB/Swiss-Prot%3BAcc:O23024]	None
AT1G04635	-0.382502	0.216375	0.487412	5.04342	42.6667	3.90172	32.6667	EMB1687	Probable ribonuclease P/MRP protein subunit POP5 [Source:UniProtKB/Swiss-Prot%3BAcc:Q6AWV1]	None
AT1G04640	-0.179567	0.0595502	0.221054	46.6567	621	41.7553	534	LIP2	LIP2 [Source:UniProtKB/TrEMBL%3BAcc:A0A178WI01]	None
AT1G04670	1.89869	0.596843	NA	0	0	0.0733097	0.666667	NA	Putative uncharacterized protein [Source:UniProtKB/TrEMBL%3BAcc:Q5Q0I9]	None
AT1G04690	0.123938	0.079304	0.269276	54.753	1308	60.558	1398.67	KAB1	Probable voltage-gated potassium channel subunit beta [Source:UniProtKB/Swiss-Prot%3BAcc:O23016]	None
AT1G04700	0.0133691	0.955298	0.984837	0.967676	67	0.983036	67.3333	NA	PB1 domain-containing protein tyrosine kinase [Source:UniProtKB/TrEMBL%3BAcc:F4I5S1]	None
AT1G04710	-0.158663	0.125263	0.35401	15.5517	507	14.0853	447	KAT1	PKT4 [Source:UniProtKB/TrEMBL%3BAcc:A0A178W7T5]	None
AT1G04760	-0.242263	0.597586	0.81462	2.20578	19	1.88631	15.6667	VAMP726	Putative vesicle-associated membrane protein 726 [Source:UniProtKB/Swiss-Prot%3BAcc:Q9MAS5]	None
AT1G04778	0.0415504	0.966526	NA	1.55332	3.33333	1.62495	3.33333	NA	unknown protein%3B FUNCTIONS IN: molecular_function unknown%3B INVOLVED IN: biological_process unknown%3B LOCATED IN: cellular_component unknown%3B Ha. [Source:TAIR%3BAcc:AT1G04778]	None
AT1G04790	0.0676867	0.529216	0.773113	9.76266	400.333	10.3378	413	NA	At1g04790 [Source:UniProtKB/TrEMBL%3BAcc:Q93XZ6]	None
AT1G04810	0.0391433	0.604692	0.819311	21.0584	1328.67	21.8076	1340	RPN2B	26S proteasome non-ATPase regulatory subunit 1 homolog [Source:UniProtKB/TrEMBL%3BAcc:A0A178WEG0]	None
AT1G04900	-0.114908	0.449779	0.713727	6.85378	200	6.43551	182	NA	Protein arginine methyltransferase NDUFAF7 [Source:UniProtKB/TrEMBL%3BAcc:A0A178WEZ0]	None
AT1G04940	-0.303121	0.000346527	0.0046132	88.2116	1448.67	71.6731	1149.67	TIC20-I	Protein TIC 20-I%2C chloroplastic [Source:UniProtKB/Swiss-Prot%3BAcc:Q8GZ79]	None
AT1G04970	0.213772	0.0187411	0.0996575	22.5164	586.333	26.0057	667	NA	Putative BPI/LBP family protein At1g04970 [Source:UniProtKB/Swiss-Prot%3BAcc:Q9MAU5]	None
AT1G05000	-0.0755875	0.478382	0.735494	37.1962	567.333	35.6427	529.333	NA	Phosphotyrosine protein phosphatases superfamily protein [Source:UniProtKB/TrEMBL%3BAcc:F4I780]	None
AT1G05080	-0.859405	0.812536	NA	0.0381387	0.666667	0.0186945	0.333333	NA	Putative FBD-associated F-box protein At1g05080 [Source:UniProtKB/Swiss-Prot%3BAcc:Q9ZVP2]	None
AT1G05090	0.0474588	0.89274	0.962887	0.848399	29.6667	0.881153	30.6667	NA	dentin sialophosphoprotein-related [Source:TAIR%3BAcc:AT1G05090]	None
AT1G05100	-0.121643	0.797232	0.921654	0.653079	17.3333	0.617459	15.6667	MAPKKK18	Mitogen-activated protein kinase kinase kinase 18 [Source:UniProtKB/Swiss-Prot%3BAcc:Q9ZVP5]	None
AT1G05140	-0.171512	0.0376766	0.163401	53.4658	1033	47.778	908	ARASP2	Probable membrane metalloprotease ARASP2%2C chloroplastic [Source:UniProtKB/Swiss-Prot%3BAcc:O23053]	None
AT1G05200	-0.217849	0.0864641	0.283524	8.13125	432.333	7.0056	371	GLR3.4	Glutamate receptor [Source:UniProtKB/TrEMBL%3BAcc:Q53YX3]	None
AT1G05210	-0.242923	0.235025	0.510153	10.4376	99.3333	8.9522	81.3333	NA	At1g05210 [Source:UniProtKB/TrEMBL%3BAcc:O23047]	None
AT1G05220	-0.523245	0.375648	0.655278	2.08236	14	1.4747	10	NA	Transmembrane protein 97%2C Putative [Source:UniProtKB/TrEMBL%3BAcc:O23046]	None
AT1G05260	0.1079	0.385624	0.662412	53.6264	917.667	58.2401	955.667	PER3	Peroxidase [Source:UniProtKB/TrEMBL%3BAcc:Q0WSR2]	None
AT1G05320	-0.0549569	0.55037	0.78623	12.8868	636	12.8567	597.333	NA	FUNCTIONS IN: molecular_function unknown%3B INVOLVED IN: biological_process unknown%3B LOCATED IN: cellular_component unknown%3B EXPRESSED IN: fruit%2C egg cell%3B CONTAINS InterPro DOMAIN/s: Prefoldin (InterPro:IPR009053)%3B BEST Arabidopsis thaliana protein m /.../s: unknown protein (TAIR:AT2G32240.1)%3B Ha. [Source:TAIR%3BAcc:AT1G05320]	None
AT1G05330	-0.68854	0.826186	NA	0.192007	0.666667	0.125908	0.333333	NA	YUP8H12.5 [Source:UniProtKB/TrEMBL%3BAcc:O23036]	None
AT1G05360	-0.0417218	0.806751	0.926482	5.49346	125.333	5.30675	120.667	KMS2	Vacuole membrane protein KMS2 [Source:UniProtKB/Swiss-Prot%3BAcc:F4I8Q7]	None
AT1G05380	0.0592238	0.495463	0.748268	10.6655	930	11.2609	956	NA	Acyl-CoA N-acyltransferase with RING/FYVE/PHD-type zinc finger protein [Source:UniProtKB/TrEMBL%3BAcc:Q9ZW00]	None
AT1G05400	0.655681	0.192636	0.455348	1.07745	14	1.68879	21.3333	NA	Putative uncharacterized protein [Source:UniProtKB/TrEMBL%3BAcc:Q5XVL8]	None
AT1G05420	-0.306267	0.461722	0.72273	4.37624	23	3.52071	18	ATOFP12	ovate family protein 12 [Source:TAIR%3BAcc:AT1G05420]	None
AT1G05450	0.64068	0.366393	0.647196	0.805703	6	1.44364	9.33333	NA	Bifunctional inhibitor/lipid-transfer protein/seed storage 2S albumin superfamily protein [Source:UniProtKB/TrEMBL%3BAcc:Q1G2Y5]	None
AT1G05500	0.0640791	0.418505	0.689209	27.3832	998.667	29.0047	1021.33	SYT5	Synaptotagmin-5 [Source:UniProtKB/Swiss-Prot%3BAcc:Q8L706]	None
AT1G05510	-1.63177	0.687318	NA	0.033297	0.666667	0	0	OBAP1A	Oil body-associated protein 1A [Source:UniProtKB/Swiss-Prot%3BAcc:Q9ZVY7]	None
AT1G05540	-0.134127	0.609668	0.822696	3.71493	63	3.34537	57.3333	NA	T25N20.19 [Source:UniProtKB/TrEMBL%3BAcc:Q9ZVY4]	None
AT1G05590	0.0281912	0.773057	0.910704	10.6272	512	12.1841	516	HEXO2	Beta-hexosaminidase 2 [Source:UniProtKB/Swiss-Prot%3BAcc:Q9SYK0]	None
AT1G05620	-0.0896616	0.491582	0.745149	17.7092	362.333	16.9992	328.333	URH2	Probable uridine nucleosidase 2 [Source:UniProtKB/Swiss-Prot%3BAcc:Q8LAC4]	None
AT1G05630	0.553455	9.71617e-06	0.000247207	3.6557	280	5.36945	409.667	AT5PTASE13	Endonuclease/exonuclease/phosphatase family protein [Source:TAIR%3BAcc:AT1G05630]	None
AT1G05690	-0.527322	0.00521377	0.0384254	7.46341	179.667	5.19244	127	BT3	BTB/POZ and TAZ domain-containing protein 3 [Source:UniProtKB/Swiss-Prot%3BAcc:Q9SYL0]	None
AT1G05700	0.32892	0.21985	0.491813	1.75774	72.6667	2.2545	89.3333	NA	Leucine-rich repeat transmembrane protein kinase protein [Source:TAIR%3BAcc:AT1G05700]	None
AT1G05710	0.0658489	0.793573	0.920212	5.15724	61.6667	5.66444	63.6667	NA	AT1G05710	None
AT1G05730	-0.574968	0.252814	0.531513	0.913433	16.6667	0.63177	10.6667	NA	FAM136A-like protein (DUF842) [Source:UniProtKB/TrEMBL%3BAcc:Q5BQ23]	None
AT1G05740	0.873	0.795067	NA	0.064284	0.333333	0.16421	0.666667	NA	F3F20.19 protein [Source:UniProtKB/TrEMBL%3BAcc:Q9SYL5]	None
AT1G05750	-0.405198	0.216674	0.487562	1.19121	66.3333	0.904409	48.6667	PDE247	Pentatricopeptide repeat-containing protein At1g05750%2C chloroplastic [Source:UniProtKB/Swiss-Prot%3BAcc:Q9MA50]	None
AT1G05780	0.184168	0.385404	0.662333	11.2536	85.6667	12.7668	95	NA	Vacuolar ATPase assembly integral membrane protein VMA21 homolog [Source:UniProtKB/TrEMBL%3BAcc:Q58G56]	None
AT1G05785	0.027421	0.792084	0.919525	20.4254	560.667	18.9544	560.667	NA	Got1/Sft2-like vescicle transport protein family [Source:TAIR%3BAcc:AT1G05785]	None
AT1G05805	0.318855	0.000107058	0.00181022	47.5892	1049.67	62.531	1276.67	BHLH128	Transcription factor bHLH128 [Source:UniProtKB/Swiss-Prot%3BAcc:Q8H102]	None
AT1G05830	-0.00101723	0.991892	0.99758	11.1046	861	11.1012	861	ATX2	Histone-lysine N-methyltransferase ATX2 [Source:UniProtKB/Swiss-Prot%3BAcc:P0CB22]	None
AT1G05835	0.0148214	0.938215	0.978958	16.2506	101.667	16.6386	101.333	NA	Uncharacterized protein At1g05835 [Source:UniProtKB/Swiss-Prot%3BAcc:A8MS78]	None
AT1G05860	-0.0366754	0.79569	0.921118	12.607	199.333	12.1852	190.667	NA	INO80 complex subunit D-like protein [Source:UniProtKB/TrEMBL%3BAcc:Q9MA40]	None
AT1G05880	-1.6421	0.634414	NA	0.00912659	0.666667	0	0	ARI12	Probable E3 ubiquitin-protein ligase ARI12 [Source:UniProtKB/Swiss-Prot%3BAcc:Q84RQ9]	None
AT1G05890	0.0957232	0.217483	0.488699	30.5148	1348	32.8922	1422.67	ARI5	RBR-type E3 ubiquitin transferase [Source:UniProtKB/TrEMBL%3BAcc:F4IAE4]	None
AT1G05894	0.189319	0.791678	NA	0.314104	7.33333	0.372309	8	NA	T20M3.17 protein [Source:UniProtKB/TrEMBL%3BAcc:Q9MA36]	None
AT1G05900	-0.0970156	0.41824	0.68893	25.7506	532.667	24.1658	497.333	NTH2	Endonuclease III homolog [Source:UniProtKB/TrEMBL%3BAcc:A0A178W393]	None
AT1G05910	-0.0849362	0.392503	0.667418	8.67111	701.333	8.2727	652	NA	ATPase family AAA domain-containing protein At1g05910 [Source:UniProtKB/Swiss-Prot%3BAcc:F4IAE9]	None
AT1G05990	0.504318	0.631834	NA	0.304	3	0.450876	4	CML7	Calmodulin-like protein 7 [Source:UniProtKB/Swiss-Prot%3BAcc:Q9LNE7]	None
AT1G06010	-0.201972	0.38118	0.660479	13.1001	105	11.6282	86.6667	NA	Basic leucine zipper/W2 domain protein [Source:UniProtKB/TrEMBL%3BAcc:Q84R19]	None
AT1G06020	-0.964898	0.79041	NA	0.0195706	0.333333	0	0	NA	Probable fructokinase-3 [Source:UniProtKB/Swiss-Prot%3BAcc:Q9LNE4]	None
AT1G06030	0.877562	0.709508	NA	0.0210412	0.333333	0.0437847	0.666667	NA	Probable fructokinase-2 [Source:UniProtKB/Swiss-Prot%3BAcc:Q9LNE3]	None
AT1G06060	0.333089	0.00835718	0.0545149	16.3558	256.333	20.6564	319.333	NA	At1g06060 [Source:UniProtKB/TrEMBL%3BAcc:Q9LNE1]	None
AT1G06080	0.762224	0.00105522	0.0112382	3.44285	72.6667	5.97222	119.667	ADS1	Delta-9 acyl-lipid desaturase 1 [Source:UniProtKB/Swiss-Prot%3BAcc:O65797]	None
AT1G06090	0.273132	0.393668	0.668153	13.7208	258.667	16.6791	293	NA	Delta-9 desaturase-like 1 protein [Source:UniProtKB/Swiss-Prot%3BAcc:Q9LND9]	None
AT1G06120	-0.41397	0.117349	0.34112	3.72328	67	2.82676	48.6667	NA	Delta-9 desaturase-like 3 protein [Source:UniProtKB/Swiss-Prot%3BAcc:Q9FPD5]	None
AT1G06135	2.44165	0.403273	NA	0	0	0.176836	1	NA	Transmembrane protein [Source:UniProtKB/TrEMBL%3BAcc:Q8LCX3]	None
AT1G06140	-0.423241	0.25458	0.533605	1.12262	32.3333	0.857366	23.3333	PCMP-E61	Pentatricopeptide repeat-containing protein At1g06140%2C mitochondrial [Source:UniProtKB/Swiss-Prot%3BAcc:Q9LND4]	None
AT1G06160	0.295113	0.124565	0.352881	8.33438	121.667	10.5767	143.333	ERF094	Ethylene-responsive transcription factor ERF094 [Source:UniProtKB/Swiss-Prot%3BAcc:Q9LND1]	None
AT1G06180	-0.275836	0.161713	0.411554	7.99825	111.333	6.78078	89	ATMYB13	Transcription factor MYB13 [Source:UniProtKB/Swiss-Prot%3BAcc:Q9LNC9]	None
AT1G06210	-0.0898841	0.408135	0.680973	14.2877	385.667	13.6351	357	TOL2	TOM1-like protein 2 [Source:UniProtKB/Swiss-Prot%3BAcc:Q9LNC6]	None
AT1G06220	-0.21078	0.00513215	0.0380407	25.3053	1710.67	21.9411	1459	CLO	110 kDa U5 small nuclear ribonucleoprotein component CLO [Source:UniProtKB/Swiss-Prot%3BAcc:Q9LNC5]	None
AT1G06230	0.0189476	0.825196	0.93414	16.0105	1035.67	16.4398	1034	GTE4	Transcription factor GTE4 [Source:UniProtKB/Swiss-Prot%3BAcc:Q9LNC4]	None
AT1G06240	-0.119434	0.377961	0.6574	13.4404	274	12.3955	247	NA	Uncharacterized protein At1g06240 [Source:UniProtKB/TrEMBL%3BAcc:Q8H109]	None
AT1G06260	0.0913074	0.854538	0.947182	0.780325	14.3333	0.83294	15	NA	Cysteine proteinases superfamily protein [Source:UniProtKB/TrEMBL%3BAcc:Q9LNC1]	None
AT1G06290	0.0979377	0.270278	0.551566	34.1135	1512.67	36.7964	1571.67	ACX3	Acyl-coenzyme A oxidase 3%2C peroxisomal [Source:UniProtKB/Swiss-Prot%3BAcc:P0CZ23]	None
AT1G06310	0.689581	0.326251	NA	0.159916	6	0.266933	9.33333	ACX3.2	Putative acyl-coenzyme A oxidase 3.2%2C peroxisomal [Source:UniProtKB/Swiss-Prot%3BAcc:Q9LMI7]	None
AT1G06320	0.668079	0.706765	NA	0.129686	1	0.204511	1.66667	NA	Putative uncharacterized protein [Source:UniProtKB/TrEMBL%3BAcc:Q3EDH7]	None
AT1G06380	-0.229382	0.26347	0.543857	8.85599	133.333	7.73187	110	NA	Ribosomal protein L1p/L10e family [Source:UniProtKB/TrEMBL%3BAcc:Q9LMI1]	None
AT1G06390	-0.0313402	0.699248	0.871248	38.9367	1038	38.3691	999.667	ASK9	SK22 [Source:UniProtKB/TrEMBL%3BAcc:A0A178WCN5]	None
AT1G06410	-0.0602479	0.388221	0.664157	60.4694	3989.33	58.9635	3766	TPS7	TPS7 [Source:UniProtKB/TrEMBL%3BAcc:A0A178WH64]	None
AT1G06420	-0.513491	0.158216	0.406705	1.53779	30.3333	1.04272	21.3333	NA	DNA ligase-like protein [Source:UniProtKB/TrEMBL%3BAcc:Q9LMH9]	None
AT1G06450	0.163159	0.431418	0.699745	5.36527	112.667	6.00391	124.667	CAF1-1	Probable CCR4-associated factor 1 homolog 1 [Source:UniProtKB/Swiss-Prot%3BAcc:Q9SHJ0]	None
AT1G06470	0.167385	0.17877	0.436681	12.2024	382	13.7737	425.333	NA	Probable sugar phosphate/phosphate translocator At1g06470 [Source:UniProtKB/Swiss-Prot%3BAcc:Q8H184]	None
AT1G06490	-0.368114	0.0741888	0.257475	1.29388	142.333	1.00254	111.333	CALS7	Callose synthase 7 [Source:UniProtKB/Swiss-Prot%3BAcc:Q9SHJ3]	None
AT1G06500	-0.0338499	0.842297	0.941557	11.9374	167.667	11.8822	160	NA	AT1G06500 protein [Source:UniProtKB/TrEMBL%3BAcc:Q8VY54]	None
AT1G06510	-0.120254	0.326082	0.607904	17.8961	316.333	16.5382	288.667	NA	Forkhead-associated domain protein [Source:UniProtKB/TrEMBL%3BAcc:Q84K72]	None
AT1G06530	0.0660451	0.975966	0.993143	1.52155	39.3333	1.65996	38.3333	PMD2	Peroxisomal and mitochondrial division factor 2 [Source:UniProtKB/Swiss-Prot%3BAcc:Q9SHJ6]	None
AT1G06560	-0.104353	0.420965	0.690972	7.03691	263.667	6.55461	243.333	NA	At1g06560 [Source:UniProtKB/TrEMBL%3BAcc:Q84MA1]	None
AT1G06620	-0.0904947	0.63812	0.840102	6.45736	146.667	6.17987	132.667	NA	1-aminocyclopropane-1-carboxylate oxidase homolog 1 [Source:UniProtKB/Swiss-Prot%3BAcc:Q84MB3]	None
AT1G06630	-0.0028784	0.985034	0.995381	8.20079	168	8.20834	166.333	NA	F-box/RNI-like superfamily protein [Source:UniProtKB/TrEMBL%3BAcc:F4IDP6]	None
AT1G06640	0.234894	0.0282456	0.133189	41.8777	916.333	49.9305	1065.67	NA	1-aminocyclopropane-1-carboxylate oxidase homolog 2 [Source:UniProtKB/Swiss-Prot%3BAcc:Q9C5K7]	None
AT1G06645	-0.123475	0.0991153	0.308711	43.9958	1198	42.9621	1074	NA	2-oxoglutarate (2OG) and Fe(II)-dependent oxygenase superfamily protein [Source:TAIR%3BAcc:AT1G06645]	None
AT1G06670	-0.132736	0.108048	0.324523	12.631	1352.33	11.6446	1225	NIH	DExH-box ATP-dependent RNA helicase DExH2 [Source:UniProtKB/Swiss-Prot%3BAcc:F4IDQ6]	None
AT1G06680	-0.168096	0.00185369	0.0176713	3434.6	62204.3	3101.13	54513.7	PSBP1	Oxygen-evolving enhancer protein 2-1%2C chloroplastic [Source:UniProtKB/Swiss-Prot%3BAcc:Q42029]	None
AT1G06730	-0.422266	0.000538307	0.00653575	9.45751	345.333	7.16974	253.667	NA	At1g06730/F4H5_22 [Source:UniProtKB/TrEMBL%3BAcc:Q9ASV2]	None
AT1G06750	-0.203517	0.740111	0.892913	0.264079	11.3333	0.223943	10.3333	NA	p-loop containing nucleoside triphosphate hydrolases superfamily protein [Source:UniProtKB/TrEMBL%3BAcc:F4IDR5]	None
AT1G06780	0.137603	0.289731	0.57166	7.51837	295.667	8.34817	318.333	GAUT6	Hexosyltransferase [Source:UniProtKB/TrEMBL%3BAcc:F4IDS0]	None
AT1G06790	-0.0660489	0.724131	0.88375	11.1071	146	10.9707	136.333	NA	F4H5.12 protein [Source:UniProtKB/TrEMBL%3BAcc:Q9M9Y6]	None
AT1G06850	0.00705801	0.961922	0.987787	9.9221	178	10.0597	176.333	AtbZIP52	AtbZIP transcription factor [Source:UniProtKB/TrEMBL%3BAcc:Q8VWG0]	None
AT1G06870	-0.102867	0.363505	0.643869	15.7993	395.333	14.7537	362.667	TPP2	Probable thylakoidal processing peptidase 2%2C chloroplastic [Source:UniProtKB/Swiss-Prot%3BAcc:Q9M9Z2]	None
AT1G06910	0.183384	0.452647	0.715899	2.7733	76	3.11489	87.3333	TRFL7	TRFL7 [Source:UniProtKB/TrEMBL%3BAcc:A0A178W486]	None
AT1G06923	-0.0997967	0.893499	0.962974	0.427059	8	0.400904	7.66667	NA	Transcription repressor OFP17-like protein [Source:UniProtKB/TrEMBL%3BAcc:Q1G3W7]	None
AT1G06930	-0.600051	0.320396	0.602244	1.16067	11.6667	0.752785	7.66667	NA	Expressed protein [Source:UniProtKB/TrEMBL%3BAcc:Q5BQ22]	None
AT1G06960	0.0375738	0.783458	0.91581	15.9802	213	16.6401	214	NA	U2 small nuclear ribonucleoprotein B'' 2 [Source:UniProtKB/Swiss-Prot%3BAcc:Q8H1S6]	None
AT1G06970	-1.26996	0.319251	NA	0.10559	4.33333	0.0442551	1.66667	CHX14	CHX14 [Source:UniProtKB/TrEMBL%3BAcc:A0A178WC73]	None
AT1G06990	-0.00310747	0.999392	NA	0.0177261	0.333333	0.0193412	0.333333	NA	GDSL esterase/lipase At1g06990 [Source:UniProtKB/Swiss-Prot%3BAcc:Q9LMJ3]	None
AT1G07010	-0.36825	1.50395e-06	4.9791e-05	50.0311	1359	38.754	1036.33	NA	Calcineurin-like metallo-phosphoesterase superfamily protein [Source:UniProtKB/TrEMBL%3BAcc:F4HNW0]	None
AT1G07070	-0.383669	0.00274971	0.0239984	42.81	292.667	33.4254	220	RPL35AA	60S ribosomal protein L35a-1 [Source:UniProtKB/Swiss-Prot%3BAcc:Q9LMK0]	None
AT1G07080	0.175752	0.0306216	0.141085	98.0686	1709	111.155	1874.67	NA	At1g07080/F10K1_15 [Source:UniProtKB/TrEMBL%3BAcc:Q93VQ6]	None
AT1G07130	0.0828109	0.654105	0.848881	9.831	135	10.4165	140	STN1	CST complex subunit STN1 [Source:UniProtKB/Swiss-Prot%3BAcc:Q9LMK5]	None
AT1G07170	0.237286	0.1714	0.425311	22.2591	196	26.8934	223	NA	PHD finger-like domain-containing protein 5A [Source:UniProtKB/Swiss-Prot%3BAcc:P0DI19]	None
AT1G07175	1.86416	0.0618317	NA	1.11657	2.33333	4.88149	7.66667	NA	unknown protein%3B FUNCTIONS IN: molecular_function unknown%3B INVOLVED IN: biological_process unknown%3B LOCATED IN: endomembrane system%3B BEST Arabidopsis thaliana protein match is: unknown protein (TAIR:AT2G29995.1)%3B Ha. [Source:TAIR%3BAcc:AT1G07175]	None
AT1G07210	-0.083332	0.434688	0.702655	28.3475	552	27.1281	510.333	NA	F10K1.8 protein [Source:UniProtKB/TrEMBL%3BAcc:Q9LML3]	None
AT1G07240	0.149515	0.0854132	0.281738	23.8211	682.667	26.5952	745.333	UGT71C5	UDP-glycosyltransferase 71C5 [Source:UniProtKB/Swiss-Prot%3BAcc:Q9FE68]	None
AT1G07250	0.0856823	0.355943	0.637426	25.5307	726.333	27.2774	760	UGT71C4	Flavonol 3-O-glucosyltransferase UGT71C4 [Source:UniProtKB/Swiss-Prot%3BAcc:Q9LML6]	None
AT1G07280	0.139056	0.104431	0.318413	34.3818	1163	38.4863	1264.33	NA	At1g07280/F22G5_32 [Source:UniProtKB/TrEMBL%3BAcc:Q8VZC8]	None
AT1G07320	-0.263886	0.000447709	0.00565741	460.073	10810.7	391.033	8813.33	RPL4	RPL4 [Source:UniProtKB/TrEMBL%3BAcc:A0A384KN11]	None
AT1G07330	-0.8248	0.457179	NA	0.114689	4	0.0639261	2.33333	NA	Dentin sialophosphoprotein [Source:UniProtKB/TrEMBL%3BAcc:Q9LNV2]	None
AT1G07370	-0.278141	0.0357191	0.157397	20.2918	328.667	16.9462	264	PCNA	Proliferating cellular nuclear antigen 1 [Source:UniProtKB/Swiss-Prot%3BAcc:Q9M7Q7]	None
AT1G07390	-0.1768	0.252899	0.531513	4.18864	175.667	3.07984	151.667	AtRLP1	Receptor like protein 1 [Source:UniProtKB/TrEMBL%3BAcc:F4HQM4]	None
AT1G07410	0.171304	0.112302	0.332022	26.8592	439	30.1834	482.667	RABA2B	RABA2b [Source:UniProtKB/TrEMBL%3BAcc:A0A178WHD5]	None
AT1G07460	1.897	0.564092	NA	0	0	0.090801	0.666667	NA	Concanavalin A-like lectin family protein [Source:UniProtKB/TrEMBL%3BAcc:Q9LNW6]	None
AT1G07470	0.0145162	0.897854	0.964525	11.7805	320.333	11.9427	319.333	NA	At1g07470/F22G5_13 [Source:UniProtKB/TrEMBL%3BAcc:Q93VP4]	None
AT1G07510	0.00557507	0.946516	0.982207	24.4264	997.333	26.1938	988.667	FTSH10	ATP-dependent zinc metalloprotease FTSH 10%2C mitochondrial [Source:UniProtKB/Swiss-Prot%3BAcc:Q8VZI8]	None
AT1G07560	0.49961	0.0362991	0.159063	1.60087	70.3333	2.2914	98.3333	NA	Probable LRR receptor-like serine/threonine-protein kinase At1g07560 [Source:UniProtKB/Swiss-Prot%3BAcc:C0LGD9]	None
AT1G07610	0.290683	0.0106356	0.0658764	462.166	2554.33	582.179	3014.67	MT1C	Metallothionein-like protein 1C [Source:UniProtKB/Swiss-Prot%3BAcc:Q38804]	None
AT1G07630	0.211502	0.0538842	0.20801	11.9672	458.667	14.1202	517	PLL5	PLL5 [Source:UniProtKB/TrEMBL%3BAcc:A0A178WGF5]	None
AT1G07660	-0.275795	0.00911538	0.0585714	96.9219	1003	81.6177	813	NA	Histone H4 [Source:UniProtKB/Swiss-Prot%3BAcc:P59259]	None
AT1G07700	-0.350298	3.3381e-05	0.00070428	57.2342	837.667	45.0038	648	NA	Thioredoxin superfamily protein [Source:TAIR%3BAcc:AT1G07700]	None
AT1G07705	0.0986164	0.31809	0.600116	12.4781	480	13.4081	505	NA	NOT2 / NOT3 / NOT5 family [Source:UniProtKB/TrEMBL%3BAcc:A8MR45]	None
AT1G07790	-0.417902	4.57143e-05	0.000923142	137.763	1622.67	105.085	1185.67	HTB1	Histone H2B.1 [Source:UniProtKB/Swiss-Prot%3BAcc:Q9LQQ4]	None
AT1G07795	0.302706	0.455522	0.718017	2.58915	19.6667	3.18734	23.6667	NA	At1g07795 [Source:UniProtKB/TrEMBL%3BAcc:Q29PW8]	None
AT1G07810	0.131018	0.0997839	0.309994	17.0725	1161.33	18.8941	1254	ECA1	Calcium-transporting ATPase 1%2C endoplasmic reticulum-type [Source:UniProtKB/Swiss-Prot%3BAcc:P92939]	None
AT1G07830	0.0335112	0.778845	0.913642	31.6598	359	32.8028	357.333	NA	At1g07830/F24B9_7 [Source:UniProtKB/TrEMBL%3BAcc:Q94JQ7]	None
AT1G07840	-0.250765	0.0151355	0.0854605	17.7947	430.333	15.2152	355	NA	AT1G07840 protein [Source:UniProtKB/TrEMBL%3BAcc:Q93ZQ9]	None
AT1G07890	-0.0425974	0.513133	0.761847	827.212	14331.3	803.648	13577	APX1	MEE6 [Source:UniProtKB/TrEMBL%3BAcc:A0A178W5I1]	None
AT1G07900	0.317886	0.00319619	0.0267822	5.41369	423	6.78973	524	LBD1	LBD1 [Source:UniProtKB/TrEMBL%3BAcc:A0A178WM56]	None
AT1G07920	-0.223534	0.00025338	0.00358526	223.925	6689	192.637	5665.67	A1	Elongation factor 1-alpha 4 [Source:UniProtKB/Swiss-Prot%3BAcc:Q8GTY0]	None
AT1G07930	-0.310227	9.55432e-07	3.38865e-05	406.581	12394.7	329.844	9752	A1	Elongation factor 1-alpha 4 [Source:UniProtKB/Swiss-Prot%3BAcc:Q8GTY0]	None
AT1G07960	-0.026677	0.82194	0.932314	22.8354	304	22.9506	294.667	PDIL5-1	PDIL5-1 [Source:UniProtKB/TrEMBL%3BAcc:A0A178WDX4]	None
AT1G07985	-0.0506656	0.900071	0.965168	2.20615	25.6667	2.21876	23.6667	NA	Expressed protein [Source:UniProtKB/TrEMBL%3BAcc:Q3EDG6]	None
AT1G07990	0.0621334	0.436164	0.704361	17.213	921.667	18.2064	946.667	NA	At1g07990/T6D22_5 [Source:UniProtKB/TrEMBL%3BAcc:Q8L7T5]	None
AT1G08035	1.17571	0.591362	NA	0.152157	0.666667	0.326109	1.66667	SMR16	Cyclin-dependent protein kinase inhibitor SMR16 [Source:UniProtKB/Swiss-Prot%3BAcc:Q9LN05]	None
AT1G08090	-0.728051	0.326457	0.608434	0.198526	7.66667	0.124249	4.33333	NRT2.1	High-affinity nitrate transporter 2.1 [Source:UniProtKB/Swiss-Prot%3BAcc:O82811]	None
AT1G08110	0.059634	0.383843	0.661642	100.019	1580	106.042	1623.33	NA	Lactoylglutathione lyase [Source:UniProtKB/TrEMBL%3BAcc:B9DH52]	None
AT1G08120	-3.0553	0.189041	NA	0.0853476	1.66667	0	0	NA	TP53-regulating kinase-like protein [Source:UniProtKB/TrEMBL%3BAcc:Q5Q0I2]	None
AT1G08190	-0.0165199	0.818853	0.93118	32.0727	2338.67	32.1697	2270.33	VPS41	Vacuolar protein sorting-associated protein 41 homolog [Source:UniProtKB/Swiss-Prot%3BAcc:P93043]	None
AT1G08260	0.0398851	0.736818	0.891272	3.42211	439.667	3.52757	447.667	POL2A	DNA polymerase epsilon catalytic subunit A [Source:UniProtKB/Swiss-Prot%3BAcc:F4HW04]	None
AT1G08280	-0.0898118	0.570286	0.798866	8.55313	177.667	8.10483	166	GALT29A	Beta-1%2C6-galactosyltransferase GALT29A [Source:UniProtKB/Swiss-Prot%3BAcc:Q9SGD2]	None
AT1G08300	0.21504	0.159365	0.408659	5.63349	189.333	5.70918	217.667	NVL	No vein-like protein [Source:UniProtKB/TrEMBL%3BAcc:F4HW09]	None
AT1G08340	0.00621438	0.973754	0.992345	4.07442	116.667	4.2411	113	ROPGAP5	Rho GTPase-activating protein 5 [Source:UniProtKB/Swiss-Prot%3BAcc:Q6NKT5]	None
AT1G08360	-0.122939	0.112924	0.332978	308.592	4325.67	286.516	3876.67	RPL10AA	60S ribosomal protein L10a-1 [Source:UniProtKB/Swiss-Prot%3BAcc:Q8VZB9]	None
AT1G08370	0.0836331	0.386762	0.66292	27.4026	538.667	28.8184	563.333	DCP1	mRNA-decapping enzyme-like protein [Source:UniProtKB/Swiss-Prot%3BAcc:Q9SJF3]	None
AT1G08390	-0.0884109	0.687721	0.864921	11.7861	87.3333	11.2012	80.3333	NA	RecQ-mediated instability-like protein [Source:UniProtKB/TrEMBL%3BAcc:Q8RX36]	None
AT1G08410	-0.312836	0.0120176	0.0725352	8.4652	333	6.864	266.333	LSG1-2	GTPase LSG1-2 [Source:UniProtKB/Swiss-Prot%3BAcc:Q9SJF1]	None
AT1G08420	0.0680124	0.454655	0.717517	18.5921	1483.67	19.5513	1534.67	BSL2	Serine/threonine-protein phosphatase BSL2 [Source:UniProtKB/Swiss-Prot%3BAcc:Q9SJF0]	None
AT1G08430	0.366838	0.00971513	0.0614066	12.3931	342	16.1716	432.333	ALMT1	Aluminum-activated malate transporter 1 [Source:UniProtKB/Swiss-Prot%3BAcc:Q9SJE9]	None
AT1G08440	0.397884	0.77899	NA	0.0638222	1.33333	0.075437	2	ALMT2	Aluminum-activated malate transporter 2 [Source:UniProtKB/Swiss-Prot%3BAcc:Q9SJE8]	None
AT1G08460	0.576281	5.82837e-08	2.89946e-06	13.2049	331	19.7036	485	HDA8	Histone deacetylase 8 [Source:UniProtKB/Swiss-Prot%3BAcc:Q94EJ2]	None
AT1G08465	0.12117	0.436856	0.704755	11.6599	175.667	12.6529	188.667	YAB2	Putative axial regulator YABBY 2 [Source:UniProtKB/Swiss-Prot%3BAcc:Q9XFB0]	None
AT1G08480	-0.095823	0.281047	0.563454	115.3	1231	108.656	1123.33	SDH6	Succinate dehydrogenase subunit 6%2C mitochondrial [Source:UniProtKB/Swiss-Prot%3BAcc:Q941A6]	None
AT1G08500	0.324112	0.0541054	0.208311	11.0076	133	13.9387	162	ENODL18	Early nodulin-like protein 18 [Source:UniProtKB/TrEMBL%3BAcc:O82083]	None
AT1G08520	-0.0632884	0.37758	0.656951	101.65	5143	98.4517	4851.67	CHLD	Mg-protoporphyrin IX chelatase [Source:UniProtKB/TrEMBL%3BAcc:A0A178W355]	None
AT1G08530	0.0611105	0.708067	0.876047	13.6619	157.667	14.194	162.333	NA	Chitinase-like protein [Source:UniProtKB/TrEMBL%3BAcc:Q0WNC2]	None
AT1G08540	-0.243262	0.000699781	0.00805643	37.0024	1338.67	31.7187	1113.67	SIGB	RNA polymerase sigma factor sigB [Source:UniProtKB/Swiss-Prot%3BAcc:O22056]	None
AT1G08550	0.198018	0.0139453	0.0803576	39.5988	1297	46.2117	1460	VDE1	NPQ1 [Source:UniProtKB/TrEMBL%3BAcc:A0A384K8V4]	None
AT1G08570	-0.0704984	0.328986	0.610859	82.7083	1674.33	79.5154	1579.33	ACHT4	Thioredoxin-like 1-1%2C chloroplastic [Source:UniProtKB/Swiss-Prot%3BAcc:O64654]	None
AT1G08590	0.173092	0.164117	0.415356	5.77251	323	6.52823	361.333	PXL1	Leucine-rich repeat receptor-like protein kinase PXL1 [Source:UniProtKB/Swiss-Prot%3BAcc:Q9FRS6]	None
AT1G08600	-0.0709622	0.515052	0.763272	7.28306	771.333	7.03002	729	ATRX	CHR20 [Source:UniProtKB/TrEMBL%3BAcc:A0A178VZQ9]	None
AT1G08620	0.0119047	0.899141	0.964936	7.87104	686.333	8.05381	680.667	PKDM7D	Transcription factor jumonji (jmj) family protein / zinc finger (C5HC2 type) family protein [Source:TAIR%3BAcc:AT1G08620]	None
AT1G08650	0.475329	1.62953e-05	0.000386024	15.1299	311.333	20.523	424.333	PPCK1	Phosphoenolpyruvate carboxylase kinase 1 [Source:UniProtKB/Swiss-Prot%3BAcc:Q9SPK4]	None
AT1G08680	-0.147974	0.0963852	0.303287	18.2257	836.333	16.5957	742.667	ZIGA4	ARF GAP-like zinc finger-containing protein ZIGA4 [Source:UniProtKB/TrEMBL%3BAcc:F4HXP0]	None
AT1G08710	-0.053596	0.741111	0.893322	7.78001	149.667	7.34916	143.333	SKIP24	F-box protein SKIP24 [Source:UniProtKB/Swiss-Prot%3BAcc:Q9CAZ0]	None
AT1G08720	0.201704	0.0450161	0.183838	7.07838	413.667	8.21078	466.667	EDR1	Serine/threonine-protein kinase EDR1 [Source:UniProtKB/Swiss-Prot%3BAcc:Q9FPR3]	None
AT1G08730	-1.3619	0.00320382	0.0268343	0.338818	28.3333	0.130024	11.3333	XI-C	Myosin-9 [Source:UniProtKB/Swiss-Prot%3BAcc:F4HXP9]	None
AT1G08750	0.196163	0.15474	0.401571	10.5459	209	12.1118	235.333	NA	Peptidase C13 family [Source:UniProtKB/TrEMBL%3BAcc:Q8GYI6]	None
AT1G08760	0.0612131	0.582868	0.806578	7.96113	379.333	8.41329	387.667	NA	At1g08760 [Source:UniProtKB/TrEMBL%3BAcc:Q9FRR2]	None
AT1G08770	-0.0238356	0.83943	0.940806	33.8113	384	33.5279	367.333	PRA1E	PRA1 family protein [Source:UniProtKB/TrEMBL%3BAcc:A0A178W4Z3]	None
AT1G08830	0.195848	0.569294	0.797969	78.6037	1002	89.7904	1198.67	CSD1	Superoxide dismutase [Cu-Zn] 1 [Source:UniProtKB/Swiss-Prot%3BAcc:P24704]	None
AT1G08845	-0.148846	0.507669	0.757846	9.1441	95	8.3947	82.3333	NA	Ribosomal L18p/L5e family protein [Source:UniProtKB/TrEMBL%3BAcc:F4HXR7]	None
AT1G08860	-0.617593	0.659919	NA	0.0819129	2.66667	0.055702	1.66667	BON3	Protein BONZAI 3 [Source:UniProtKB/Swiss-Prot%3BAcc:Q5XQC7]	None
AT1G08890	0.518956	1.8986e-07	8.25084e-06	25.2794	623.667	35.8591	874.333	SUGTL4	Sugar transporter ERD6-like 1 [Source:UniProtKB/Swiss-Prot%3BAcc:Q9SCW7]	None
AT1G08910	0.160093	0.176717	0.433346	7.46909	384.667	8.40996	428.667	NA	zinc ion binding%3Bzinc ion binding [Source:TAIR%3BAcc:AT1G08910]	None
AT1G08920	0.0454903	0.73608	0.890849	11.2352	343.333	11.7358	347.333	ESL1	ERD (early response to dehydration) six-like 1 [Source:TAIR%3BAcc:AT1G08920]	None
AT1G08930	0.0916113	0.235242	0.5105	99.9842	3281	108.038	3417.33	ERD6	ERD6 [Source:UniProtKB/TrEMBL%3BAcc:A0A178W9Q9]	None
AT1G08940	0.261196	0.0850007	0.28087	10.8723	212.667	13.4226	251.333	NA	Phosphoglycerate mutase-like protein AT74H [Source:UniProtKB/Swiss-Prot%3BAcc:O04035]	None
AT1G08960	-0.0139586	0.917533	0.971791	9.00222	251.333	8.87416	245	CCX5	CCX5 [Source:UniProtKB/TrEMBL%3BAcc:A0A178W3U3]	None
AT1G08970	-0.00853024	0.932728	0.976921	30.5798	630.333	30.9645	616.333	NFYC9	Nuclear transcription factor Y subunit C-9 [Source:UniProtKB/Swiss-Prot%3BAcc:Q8L4B2]	None
AT1G08980	0.194189	0.0251871	0.122653	45.4272	1057.67	52.0233	1195.33	AMI1	Amidase 1 [Source:UniProtKB/Swiss-Prot%3BAcc:Q9FR37]	None
AT1G08990	0.196729	0.3023	0.583846	4.05328	143.333	4.77031	160	GUX5	Putative UDP-glucuronate:xylan alpha-glucuronosyltransferase 5 [Source:UniProtKB/Swiss-Prot%3BAcc:F4HZC3]	None
AT1G09000	0.0339908	0.865579	0.951663	2.55976	99.3333	2.6231	101.333	ANP1	Mitogen-activated protein kinase kinase kinase ANP1 [Source:UniProtKB/Swiss-Prot%3BAcc:O22040]	None
AT1G09040	-0.0709126	0.682104	0.86319	2.99136	159.333	2.84132	151	NA	unknown protein%3B FUNCTIONS IN: molecular_function unknown%3B INVOLVED IN: biological_process unknown%3B LOCATED IN: membrane%3B EXPRESSED IN: leaf%3B BEST Arabidopsis thaliana protein match is: unknown protein (TAIR:AT1G09050.1)%3B Ha. [Source:TAIR%3BAcc:AT1G09040]	None
AT1G09070	0.0838201	0.400169	0.673864	88.4177	2102.67	93.856	2201.33	SRC2	Protein SRC2 homolog [Source:UniProtKB/Swiss-Prot%3BAcc:O04023]	None
AT1G09090	0.448067	0.0198861	0.103991	3.16303	151.333	4.35762	203.333	RBOHB	Respiratory burst oxidase homolog protein B [Source:UniProtKB/Swiss-Prot%3BAcc:Q9SBI0]	None
AT1G09150	-0.0404492	0.685674	0.86404	32.6435	525.667	31.7648	502	NA	Pseudouridine synthase and archaeosine transglycosylase (PUA) domain-containing protein [Source:UniProtKB/TrEMBL%3BAcc:Q8L7N2]	None
AT1G09176	-0.993933	0.383955	NA	0.75211	3.66667	0.379188	2	NA	T12M4.13 protein [Source:UniProtKB/TrEMBL%3BAcc:O80490]	None
AT1G09180	-0.789897	0.31465	NA	0.72333	6.33333	0.414463	3.66667	ATSAR1	Putative GTP-binding protein%2C SAR1B [Source:UniProtKB/TrEMBL%3BAcc:O80489]	None
AT1G09240	-0.31066	0.108888	0.325802	14.2151	216	11.6536	168.667	NAS3	Nicotianamine synthase 3 [Source:UniProtKB/Swiss-Prot%3BAcc:O80483]	None
AT1G09250	-0.0399315	0.700887	0.872381	25.4594	471.667	25.388	447.667	BHLH149	Transcription factor bHLH149 [Source:UniProtKB/Swiss-Prot%3BAcc:O80482]	None
AT1G09270	-0.128326	0.0890696	0.288578	37.0509	1510.67	34.3764	1356.67	IMPA4	Importin subunit alpha-4 [Source:UniProtKB/Swiss-Prot%3BAcc:O80480]	None
AT1G09300	-0.000381737	0.998024	0.999187	6.36517	193.333	6.43211	188.667	ICP55	Intermediate cleaving peptidase 55%2C mitochondrial [Source:UniProtKB/Swiss-Prot%3BAcc:F4HZG9]	None
AT1G09310	0.0133847	0.839929	0.940913	1676.74	25080.3	1725.18	24608	NA	T31J12.3 protein [Source:UniProtKB/TrEMBL%3BAcc:Q9ZPZ4]	None
AT1G09340	-0.606245	3.3695e-19	1.11749e-16	812.349	19966	541.669	13024	CRB	chloroplast RNA binding [Source:TAIR%3BAcc:AT1G09340]	None
AT1G09370	-0.9649	0.746775	NA	0.0801247	0.333333	0	0	NA	Plant invertase/pectin methylesterase inhibitor superfamily protein [Source:TAIR%3BAcc:AT1G09370]	None
AT1G09390	-0.218374	0.160644	0.410268	10.7375	221	9.30147	184.333	NA	GDSL esterase/lipase At1g09390 [Source:UniProtKB/Swiss-Prot%3BAcc:O80522]	None
AT1G09410	-0.195577	0.800906	NA	0.15428	6.33333	0.130571	5.66667	PCMP-H18	Pentatricopeptide repeat-containing protein At1g09410%2C mitochondrial [Source:UniProtKB/Swiss-Prot%3BAcc:Q56XI1]	None
AT1G09430	0.495326	1.88049e-10	1.70908e-08	39.3312	1305.67	56.3614	1788	ACLA-3	ATP-citrate synthase alpha chain protein 3 [Source:UniProtKB/Swiss-Prot%3BAcc:O80526]	None
AT1G09450	-0.121264	0.660716	0.852095	1.42671	52.3333	1.30094	48.3333	HASPIN	Serine/threonine-protein kinase haspin homolog [Source:UniProtKB/Swiss-Prot%3BAcc:O80528]	None
AT1G09460	0.441627	0.00286898	0.0247941	11.8881	207	16.3838	274.667	NA	Carbohydrate-binding X8 domain superfamily protein [Source:UniProtKB/TrEMBL%3BAcc:F4I0Z2]	None
AT1G09480	-0.528441	0.223363	0.496818	1.24702	24.6667	0.90957	17	NA	NAD(P)-binding Rossmann-fold superfamily protein [Source:UniProtKB/TrEMBL%3BAcc:F4I0Z5]	None
AT1G09490	0.103897	0.376874	0.656519	19.1988	318.333	20.826	337	NA	At1g09490/F14J9_15 [Source:UniProtKB/TrEMBL%3BAcc:O80532]	None
AT1G09500	-1.1581	0.322088	NA	0.212739	4.33333	0.121781	2	NA	At1g09500/F14J9_16 [Source:UniProtKB/TrEMBL%3BAcc:O80533]	None
AT1G09530	0.0630898	0.471056	0.729607	23.6001	747	24.844	770.667	PIF3	Transcription factor PIF3 [Source:UniProtKB/Swiss-Prot%3BAcc:O80536]	None
AT1G09540	0.0236748	0.940684	0.979894	1.87617	41	1.95145	40.3333	MYB61	MYB61 [Source:UniProtKB/TrEMBL%3BAcc:A0A178WLE4]	None
AT1G09560	0.00923314	0.965709	0.989099	135.938	1181.33	135.403	1133	GLP4	Germin-like protein subfamily 2 member 1 [Source:UniProtKB/Swiss-Prot%3BAcc:P94014]	None
AT1G09580	-0.0110772	0.929791	0.975821	17.3708	280	17.4683	270.333	NA	Transmembrane emp24 domain-containing protein p24delta3 [Source:UniProtKB/Swiss-Prot%3BAcc:Q6IDL4]	None
AT1G09590	-0.268834	0.00322939	0.0270006	341.816	4002.33	287.404	3236.67	RPL21A	60S ribosomal protein L21-1 [Source:UniProtKB/Swiss-Prot%3BAcc:Q43291]	None
AT1G09600	-0.274704	0.423894	0.693192	0.943182	36.3333	0.78529	29.6667	NA	Probable serine/threonine-protein kinase At1g09600 [Source:UniProtKB/Swiss-Prot%3BAcc:F4I114]	None
AT1G09610	0.0493441	0.923547	0.973337	0.688228	13	0.70642	13.3333	GXM1	GXM3 [Source:UniProtKB/TrEMBL%3BAcc:A0A178W7U8]	None
AT1G09640	0.0717578	0.219001	0.490877	157.522	4495.33	166.876	4640.33	NA	Probable elongation factor 1-gamma 1 [Source:UniProtKB/Swiss-Prot%3BAcc:O04487]	None
AT1G09645	0.224333	0.114609	0.335799	27.9839	257.667	33.3448	291.333	NA	At1g09645 [Source:UniProtKB/TrEMBL%3BAcc:Q6GKX8]	None
AT1G09650	-0.108334	0.872342	0.954482	0.349194	7.33333	0.32623	6.66667	NA	F-box/LRR-repeat/kelch-repeat protein At1g09650 [Source:UniProtKB/Swiss-Prot%3BAcc:O04488]	None
AT1G09665	1.9005	0.637546	NA	0	0	0.130955	0.666667	NA	Toll-Interleukin-Resistance (TIR) domain family protein [Source:UniProtKB/TrEMBL%3BAcc:Q3EDF9]	None
AT1G09710	0.12976	0.439205	0.706917	3.53676	128.333	3.90487	138.333	NA	Homeodomain-like superfamily protein [Source:UniProtKB/TrEMBL%3BAcc:F4I129]	None
AT1G09740	0.371435	0.00229415	0.0208403	60.8904	798	79.5208	995.667	NA	Adenine nucleotide alpha hydrolases-like superfamily protein [Source:UniProtKB/TrEMBL%3BAcc:Q84TF6]	None
AT1G09750	-0.144076	0.127154	0.357376	285.21	5897	256.737	5253.67	AED3	Aspartyl protease AED3 [Source:UniProtKB/Swiss-Prot%3BAcc:O04496]	None
AT1G09770	0.180539	0.00823005	0.0538342	32.1854	2056	37.1947	2302	CDC5	Cell division cycle 5-like protein [Source:UniProtKB/Swiss-Prot%3BAcc:P92948]	None
AT1G09794	-0.0813123	0.746512	0.895967	11.0602	58.6667	10.7598	54.3333	NA	Cox19 family protein (CHCH motif) [Source:UniProtKB/TrEMBL%3BAcc:F4I2K8]	None
AT1G09795	-0.123046	0.142954	0.383536	50.8103	1320.67	47.0013	1198.33	HISN1B	ATP phosphoribosyltransferase 2%2C chloroplastic [Source:UniProtKB/Swiss-Prot%3BAcc:Q8GSJ1]	None
AT1G09812	-0.0192918	0.97399	0.992428	3.23249	10.6667	3.16922	10.6667	NA	Multidrug resistance protein [Source:UniProtKB/TrEMBL%3BAcc:Q5Q0I0]	None
AT1G09815	-0.242776	0.133795	0.368588	17.6805	184	15.2811	152	POLD4	POLD4 [Source:UniProtKB/TrEMBL%3BAcc:A0A178WHS7]	None
AT1G09850	0.106652	0.283877	0.566119	17.8962	474	19.3987	504	XBCP3	At1g09850 [Source:UniProtKB/TrEMBL%3BAcc:Q0WVJ5]	None
AT1G09870	0.191972	0.0433212	0.1792	17.402	521	20.2338	582	NA	At1g09870/F21M12_26 [Source:UniProtKB/TrEMBL%3BAcc:Q941B2]	None
AT1G09900	-0.350091	0.0183489	0.0983466	6.95973	228	5.54537	174.667	NA	Pentatricopeptide repeat-containing protein At1g09900 [Source:UniProtKB/Swiss-Prot%3BAcc:Q3EDF8]	None
AT1G09960	0.206969	0.196399	0.459945	4.54993	152.667	5.2308	175.333	SUC4	Sucrose transport protein SUC4 [Source:UniProtKB/Swiss-Prot%3BAcc:Q9FE59]	None
AT1G09970	0.0744352	0.366878	0.647568	69.4988	4078	74.4348	4207	LRR XI-23	Receptor-like protein kinase 7 [Source:UniProtKB/Swiss-Prot%3BAcc:F4I2N7]	None
AT1G10010	-0.783815	0.779531	NA	0.0255176	0.666667	0.0150383	0.333333	AAP8	amino acid permease 8 [Source:TAIR%3BAcc:AT1G10010]	None
AT1G10030	0.0206093	0.878415	0.956546	25.8157	228.667	26.6737	227.333	ERG28	Ergosterol biosynthetic protein 28 [Source:UniProtKB/Swiss-Prot%3BAcc:O80594]	None
AT1G10050	0.097538	0.461803	0.72273	5.15814	330	5.65791	348.667	NA	glycosyl hydrolase family 10 protein / carbohydrate-binding domain-containing protein [Source:TAIR%3BAcc:AT1G10050]	None
AT1G10060	0.15301	0.16394	0.415098	14.8134	410.333	16.7356	446.667	ATBCAT-1	branched-chain amino acid transaminase 1 [Source:TAIR%3BAcc:AT1G10060]	None
AT1G10110	0.732206	0.498044	NA	0.119937	2.66667	0.205104	4.33333	NA	F-box protein At1g10110 [Source:UniProtKB/Swiss-Prot%3BAcc:O80603]	None
AT1G10130	0.112307	0.262201	0.542421	13.9229	902.333	15.158	958.333	ECA3	Calcium-transporting ATPase 3%2C endoplasmic reticulum-type [Source:UniProtKB/Swiss-Prot%3BAcc:Q9SY55]	None
AT1G10150	-0.427669	0.00220037	0.0201921	10.6542	272.333	8.05917	199.333	PP2A10	Protein PHLOEM PROTEIN 2-LIKE A10 [Source:UniProtKB/Swiss-Prot%3BAcc:Q9SY57]	None
AT1G10210	0.0736952	0.690447	0.86645	5.60031	118.667	5.77827	123.333	MPK1	MPK1 [Source:UniProtKB/TrEMBL%3BAcc:A0A178W6I4]	None
AT1G10220	-0.333701	0.866283	NA	0.136758	1.33333	0.0849709	1	NA	BEST Arabidopsis thaliana protein match is: ZCF37 (TAIR:AT1G59590.1)%3B Ha. [Source:TAIR%3BAcc:AT1G10220]	None
AT1G10230	-0.12164	0.479219	0.736145	17.1137	195	15.959	178	ASK18	SKP1-like protein 18 [Source:UniProtKB/Swiss-Prot%3BAcc:Q9SY65]	None
AT1G10270	-0.214658	0.0430337	0.178554	7.90169	449.667	6.82901	381.333	GRP23	Pentatricopeptide repeat-containing protein At1g10270 [Source:UniProtKB/Swiss-Prot%3BAcc:Q9SY69]	None
AT1G10290	-0.025616	0.740741	0.893218	27.3652	1813.67	27.1431	1748	DRP2A	DRP2A [Source:UniProtKB/TrEMBL%3BAcc:A0A178WBB3]	None
AT1G10300	0.417079	0.46272	0.723332	0.262482	9.66667	0.363042	12.6667	NA	Nucleolar GTP-binding protein 1 [Source:UniProtKB/TrEMBL%3BAcc:F4I4A6]	None
AT1G10330	-0.212812	0.554057	0.788139	1.66103	32	1.46489	27	PCMP-E71	Putative pentatricopeptide repeat-containing protein At1g10330 [Source:UniProtKB/Swiss-Prot%3BAcc:Q9SY75]	None
AT1G10380	-0.0744348	0.538044	0.777359	19.7178	296.667	18.6354	275.667	NA	At1g10380/F14N23_32 [Source:UniProtKB/TrEMBL%3BAcc:Q93ZB0]	None
AT1G10385	-0.0804302	0.950923	NA	0.0610528	2	0.0554162	2	EXO84A	Exocyst complex component EXO84A [Source:UniProtKB/Swiss-Prot%3BAcc:F4I4B6]	None
AT1G10450	0.0369971	0.75023	0.897692	6.67345	502.667	6.89835	516	SNL6	Paired amphipathic helix protein Sin3-like 6 [Source:UniProtKB/Swiss-Prot%3BAcc:Q9XIK6]	None
AT1G10480	0.0418814	0.870573	0.953921	2.40449	55.6667	2.51128	56.3333	ZFP5	Zinc finger protein 5 [Source:UniProtKB/Swiss-Prot%3BAcc:Q39264]	None
AT1G10490	-0.444974	0.000100929	0.00173495	7.43692	461	5.5246	336	NA	RNA cytidine acetyltransferase 1 [Source:UniProtKB/Swiss-Prot%3BAcc:Q9XIK4]	None
AT1G10510	-0.272112	0.00156612	0.0154037	28.0232	1033	23.4596	843.667	emb2004	RNI-like superfamily protein [Source:UniProtKB/TrEMBL%3BAcc:Q93ZV8]	None
AT1G10520	0.0848558	0.843107	0.941689	0.64215	19.6667	0.70665	19.6667	POLL	DNA polymerase lambda [Source:UniProtKB/Swiss-Prot%3BAcc:Q9FNY4]	None
AT1G10522	-0.676996	4.78552e-05	0.000957307	41.4127	496	25.4285	304	PRIN2	Protein PLASTID REDOX INSENSITIVE 2%2C chloroplastic [Source:UniProtKB/Swiss-Prot%3BAcc:Q9XIK0]	None
AT1G10560	1.03758	0.0127607	0.0755962	0.362217	16.6667	0.769733	33	PUB18	U-box domain-containing protein 18 [Source:UniProtKB/Swiss-Prot%3BAcc:Q9XIJ5]	None
AT1G10570	0.203156	0.0916315	0.293373	7.77088	280.333	9.07466	318	ULP1C	Ubiquitin-like-specific protease 1C [Source:UniProtKB/Swiss-Prot%3BAcc:Q8RWN0]	None
AT1G10588	1.7615	0.663335	NA	0	0	0.0960911	0.666667	NA	Gibberellin-regulated family protein [Source:UniProtKB/TrEMBL%3BAcc:Q1G2Y4]	None
AT1G10600	0.317466	0.00483001	0.0363048	17.9745	383.667	22.7363	471	AMSH2	AMSH2 [Source:UniProtKB/TrEMBL%3BAcc:A0A178W3T5]	None
AT1G10657	-0.778023	6.05135e-05	0.0011497	11.5507	121.667	6.77401	70	NA	Transmembrane protein [Source:UniProtKB/TrEMBL%3BAcc:Q0WR17]	None
AT1G10660	0.143882	0.134687	0.369861	27.3073	639	30.2449	693.667	NA	AT1G10660 protein [Source:UniProtKB/TrEMBL%3BAcc:Q8H101]	None
AT1G10670	-0.0700504	0.191123	0.452811	166.561	5172.33	161.731	4853	ACLA-1	ATP-citrate lyase A-1 [Source:UniProtKB/TrEMBL%3BAcc:F4I5V8]	None
AT1G10700	0.147559	0.155862	0.40306	17.3736	398.333	19.3963	432	PRS3	Ribose-phosphate pyrophosphokinase 3%2C chloroplastic [Source:UniProtKB/Swiss-Prot%3BAcc:Q93Z66]	None
AT1G10710	0.480121	0.649717	NA	0.158004	3.66667	0.209924	4.66667	PHS1	Protein POOR HOMOLOGOUS SYNAPSIS 1 [Source:UniProtKB/Swiss-Prot%3BAcc:Q45GQ7]	None
AT1G10720	0.139302	0.201912	0.468023	14.9397	383	16.888	414	NA	BSD domain-containing protein [Source:UniProtKB/TrEMBL%3BAcc:Q9SAD0]	None
AT1G10730	0.106352	0.559957	0.791596	5.24449	116.333	5.67809	124	AP1M1	AP-1 complex subunit mu-1 [Source:UniProtKB/Swiss-Prot%3BAcc:Q9SAC9]	None
AT1G10790	0.521948	0.346513	0.628464	0.88283	10.6667	1.3117	14.6667	NA	F20B24.21 [Source:UniProtKB/TrEMBL%3BAcc:Q9S701]	None
AT1G10810	0.0130984	0.976892	0.993143	0.755835	17.3333	0.765221	17.3333	NA	Probable aldo-keto reductase 1 [Source:UniProtKB/Swiss-Prot%3BAcc:Q9C5B9]	None
AT1G10850	-0.172369	0.0913753	0.292971	15.3042	710	13.6954	628	NA	Leucine-rich repeat protein kinase family protein [Source:UniProtKB/TrEMBL%3BAcc:Q940B9]	None
AT1G10890	0.0614671	0.462503	0.723112	27.779	949	30.3459	979.667	NA	unknown protein%3B FUNCTIONS IN: molecular_function unknown%3B INVOLVED IN: biological_process unknown%3B LOCATED IN: chloroplast%3B EXPRESSED IN: petal%2C flower%2C leaf%3B EXPRESSED DURING: LP.04 four leaves visible%2C 4 anthesis%2C petal differentiation and expans /.../age%3B BEST Arabidopsis thaliana protein match is: unknown protein (TAIR:AT5G13340.1)%3B Ha. [Source:TAIR%3BAcc:AT1G10890]	None
AT1G10910	-0.0155298	0.86401	0.951117	16.1844	610.333	16.2532	595.667	NA	Pentatricopeptide repeat-containing protein At1g10910%2C chloroplastic [Source:UniProtKB/Swiss-Prot%3BAcc:Q0WVV0]	None
AT1G10950	0.0739945	0.244254	0.521873	79.6683	2691	84.2201	2789.67	TMN1	Transmembrane 9 superfamily member 1 [Source:UniProtKB/Swiss-Prot%3BAcc:Q940G0]	None
AT1G10960	-0.477866	8.52376e-20	3.22266e-17	1145.74	8161.33	813.577	5756	FD1	Ferredoxin-1%2C chloroplastic [Source:UniProtKB/Swiss-Prot%3BAcc:O04090]	None
AT1G11020	0.0079866	0.949806	0.983154	12.8885	261	13.168	257.333	NA	RING/FYVE/PHD zinc finger superfamily protein [Source:UniProtKB/TrEMBL%3BAcc:Q8GYT4]	None
AT1G11050	-0.134058	0.471211	0.729727	3.55185	136.667	3.2408	124	NA	Probable receptor-like protein kinase At1g11050 [Source:UniProtKB/Swiss-Prot%3BAcc:O04086]	None
AT1G11060	0.02584	0.821227	0.932006	6.70361	354	6.92035	353	NA	WAPL (Wings apart-like protein regulation of heterochromatin) protein [Source:UniProtKB/TrEMBL%3BAcc:F4I7C7]	None
AT1G11090	-0.152796	0.456247	0.718561	7.12698	119.667	6.4709	106.667	NA	Alpha/beta-Hydrolases superfamily protein [Source:UniProtKB/TrEMBL%3BAcc:O04083]	None
AT1G11110	-1.82171	0.603855	NA	0.0262914	0.666667	0	0	NA	LisH and RanBPM domains containing protein [Source:TAIR%3BAcc:AT1G11110]	None
AT1G11120	0.137579	0.672938	0.85844	7.39005	33.3333	8.14895	36	NA	unknown protein%3B BEST Arabidopsis thaliana protein match is: unknown protein (TAIR:AT1G09812.1)%3B Ha. [Source:TAIR%3BAcc:AT1G11120]	None
AT1G11125	0.709818	0.112573	0.332513	0.920715	14.6667	1.54271	23.3333	NA	unknown protein%3B BEST Arabidopsis thaliana protein match is: unknown protein (TAIR:AT1G61170.1). [Source:TAIR%3BAcc:AT1G11125]	None
AT1G11130	-0.222717	0.0750707	0.259269	7.96351	358.667	6.79626	306	SUB	Leucine-rich repeat receptor-like protein kinase (Fragment) [Source:UniProtKB/TrEMBL%3BAcc:C0LGE3]	None
AT1G11160	0.0285666	0.888333	0.961327	1.19578	87.6667	1.24113	88.3333	NA	Katanin p80 WD40 repeat-containing subunit B1 homolog [Source:UniProtKB/TrEMBL%3BAcc:F4I7E1]	None
AT1G11170	0.339394	0.25784	0.537398	1.23515	37.6667	1.61619	46.3333	NA	At1g11170/T28P6_16 [Source:UniProtKB/TrEMBL%3BAcc:Q8S9J5]	None
AT1G11180	0.292444	0.0228372	0.114848	13.8443	286.333	15.6235	344.333	NA	Secretory carrier membrane protein (SCAMP) family protein [Source:TAIR%3BAcc:AT1G11180]	None
AT1G11200	-0.0122895	0.938704	0.979136	12.2905	178.667	12.2637	172.667	NA	Protein of unknown function (DUF300) [Source:TAIR%3BAcc:AT1G11200]	None
AT1G11250	0.916394	0.623124	NA	0.0477628	0.666667	0.0891137	1.33333	SYP125	Syntaxin-125 [Source:UniProtKB/Swiss-Prot%3BAcc:Q9SXB0]	None
AT1G11260	0.511953	2.68947e-09	1.86233e-07	89.6327	2895.33	127.573	4024.33	STP1	STP1 [Source:UniProtKB/TrEMBL%3BAcc:A0A178WJ63]	None
AT1G11300	-0.311945	0.0199699	0.104268	2.39759	247	1.96388	195	NA	G-type lectin S-receptor-like serine/threonine-protein kinase At1g11300 [Source:UniProtKB/Swiss-Prot%3BAcc:Q9SXB4]	None
AT1G11320	-0.0168393	0.942566	0.980795	2.72608	70.3333	2.74355	67.3333	NA	GDSL esterase/lipase [Source:UniProtKB/TrEMBL%3BAcc:Q9SXB7]	None
AT1G11330	-0.220921	0.0815006	0.273268	6.33896	316	5.53019	267.667	NA	G-type lectin S-receptor-like serine/threonine-protein kinase At1g11330 [Source:UniProtKB/Swiss-Prot%3BAcc:Q9SXB8]	None
AT1G11380	0.181419	0.168186	0.421054	12.1807	241.667	14.0257	267.333	NA	At1g11380 [Source:UniProtKB/TrEMBL%3BAcc:Q8LFV5]	None
AT1G11400	0.184803	0.136578	0.372834	15.8777	313	18.3659	349.667	PYM	PYM [Source:UniProtKB/TrEMBL%3BAcc:A0A178W3L1]	None
AT1G11410	-0.348496	0.00953313	0.0605966	7.62063	393	6.00467	311	NA	S-locus lectin protein kinase family protein [Source:TAIR%3BAcc:AT1G11410]	None
AT1G11430	-0.282371	0.00149577	0.0148198	158.299	2059	131.432	1662.33	MORF9	Multiple organellar RNA editing factor 9%2C chloroplastic [Source:UniProtKB/Swiss-Prot%3BAcc:Q9LPZ1]	None
AT1G11440	-0.275857	0.163907	0.415098	6.62232	124	5.66799	100.333	NA	At1g11440 [Source:UniProtKB/TrEMBL%3BAcc:Q9LPZ0]	None
AT1G11450	-0.209386	0.194998	0.458032	11.5405	193.333	9.82703	167.667	NA	WAT1-related protein [Source:UniProtKB/TrEMBL%3BAcc:A0A178WNM5]	None
AT1G11460	-1.03264	0.0625277	0.229341	1.28896	17.3333	0.636483	8.33333	NA	WAT1-related protein At1g11460 [Source:UniProtKB/Swiss-Prot%3BAcc:F4I8W6]	None
AT1G11475	-0.233322	0.0613531	0.226174	70.7034	419.333	61.7379	347.333	NRPB10	NRPE10 [Source:UniProtKB/TrEMBL%3BAcc:A0A178WP73]	None
AT1G11500	-0.0945867	0.928985	NA	0.546528	3.33333	0.52497	3	NA	Protein of unknown function (DUF1218) [Source:TAIR%3BAcc:AT1G11500]	None
AT1G11530	0.228078	0.0672872	0.241	44.0876	301.333	52.999	342.667	CXXS1	Thioredoxin-like protein CXXS1 [Source:UniProtKB/Swiss-Prot%3BAcc:Q8LDI5]	None
AT1G11560	0.176133	0.750636	0.897871	2.28755	12	1.97553	13.3333	OST3A	Probable dolichyl-diphosphooligosaccharide--protein glycosyltransferase subunit 3A [Source:UniProtKB/Swiss-Prot%3BAcc:F4I8X8]	None
AT1G11572	2.44007	0.396067	NA	0	0	0.171039	1	NA	Plant thionin family protein [Source:UniProtKB/TrEMBL%3BAcc:A7RED7]	None
AT1G11580	0.149458	0.0745141	0.258133	48.8913	1562.67	54.8	1700	ATPMEPCRA	methylesterase PCR A [Source:TAIR%3BAcc:AT1G11580]	None
AT1G11600	-0.537978	0.0316368	0.144704	17.9344	604	12.4432	408.333	CYP77B1	Cytochrome P450 like protein [Source:UniProtKB/TrEMBL%3BAcc:Q9SAB7]	None
AT1G11620	0	1	NA	0	0	0	0	NA	Putative F-box/LRR-repeat/kelch-repeat protein At1g11620 [Source:UniProtKB/Swiss-Prot%3BAcc:Q9SAB5]	None
AT1G11650	0.0457943	0.447563	0.712782	186.575	5006.67	193.184	5052.33	RBP45B	RBP45B [Source:UniProtKB/TrEMBL%3BAcc:A0A178WLD6]	None
AT1G11655	0.337416	0.607827	0.821679	1.51418	8.66667	1.96306	10.3333	NA	At1g11655 [Source:UniProtKB/TrEMBL%3BAcc:Q84VW6]	None
AT1G11660	0.00139043	0.987085	0.995892	15.9056	763.667	16.1607	748.333	HSP70-16	Heat shock 70 kDa protein 16 [Source:UniProtKB/Swiss-Prot%3BAcc:Q9SAB1]	None
AT1G11680	0.118529	0.0816083	0.273436	71.7609	2029.33	78.5877	2166.33	CYP51G1	Sterol 14-demethylase [Source:UniProtKB/Swiss-Prot%3BAcc:Q9SAA9]	None
AT1G11700	-0.199463	0.0919616	0.293954	23.8695	488.667	21.3395	416	NA	At1g11700 [Source:UniProtKB/TrEMBL%3BAcc:Q9SAA7]	None
AT1G11710	-0.141834	0.135123	0.370627	17.96	1315.33	15.9684	1185	NA	Pentatricopeptide repeat-containing protein At1g11710%2C mitochondrial [Source:UniProtKB/Swiss-Prot%3BAcc:Q9SAA6]	None
AT1G11750	-0.177077	0.0266574	0.127666	95.3632	1989.67	84.629	1720.33	CLPP6	ATP-dependent Clp protease proteolytic subunit [Source:UniProtKB/TrEMBL%3BAcc:F4IAG5]	None
AT1G11770	1.76444	0.632946	NA	0	0	0.0205782	0.666667	NA	Berberine bridge enzyme-like 2 [Source:UniProtKB/Swiss-Prot%3BAcc:Q9SA99]	None
AT1G11790	-0.117664	0.321682	0.603178	17.6551	366	16.2795	334	ADT1	Arogenate dehydratase [Source:UniProtKB/TrEMBL%3BAcc:A0A178W336]	None
AT1G11810	2.4866	0.470115	NA	0	0	0.0539935	1	NA	F-box protein At1g11810 [Source:UniProtKB/Swiss-Prot%3BAcc:Q9SA94]	None
AT1G11840	0.317939	2.55469e-05	0.000559604	133.854	2824	168.121	3472.67	ATGLX1	AT1G11840	None
AT1G11850	-0.29072	0.00804055	0.0528139	66.8543	815.667	54.6632	647.667	NA	F12F1.31 protein [Source:UniProtKB/TrEMBL%3BAcc:O65397]	None
AT1G11860	-0.451914	1.21895e-13	1.92026e-11	751.829	22674.7	557.589	16382	NA	Glycine cleavage T-protein family [Source:TAIR%3BAcc:AT1G11860]	None
AT1G11870	-0.170939	0.0793414	0.269276	21.3223	623	19.0676	544	OVA7	Serine--tRNA ligase%2C chloroplastic/mitochondrial [Source:UniProtKB/Swiss-Prot%3BAcc:Q8RWT8]	None
AT1G11890	0.0398484	0.679743	0.862492	34.6402	563.333	36.1195	565.333	SEC22	SEC22 [Source:UniProtKB/TrEMBL%3BAcc:A0A178WBU4]	None
AT1G11905	0.246865	0.0687547	0.244496	16.236	269.333	19.6266	313.667	NA	B-cell receptor-associated protein 31-like protein [Source:UniProtKB/TrEMBL%3BAcc:Q8L702]	None
AT1G11915	0.396809	0.444277	0.710558	0.674544	11.3333	0.899711	14.6667	NA	F12F1.23 protein [Source:UniProtKB/TrEMBL%3BAcc:O65389]	None
AT1G11930	0.250461	0.00164717	0.016092	46.8138	1077.33	56.7269	1252	NA	Pyridoxal phosphate homeostasis protein [Source:UniProtKB/TrEMBL%3BAcc:Q944L8]	None
AT1G12040	0.54923	0.219063	0.490951	7.88114	246.333	11.266	338.333	LRX1	Leucine-rich repeat extensin-like protein 1 [Source:UniProtKB/Swiss-Prot%3BAcc:O65375]	None
AT1G12050	-0.0497307	0.548768	0.784772	31.6361	872.333	30.6518	832	FAH	Fumarylacetoacetase [Source:UniProtKB/Swiss-Prot%3BAcc:Q8RW90]	None
AT1G12060	0.000452827	0.998472	0.999487	7.95805	65	8.08017	63.3333	BAG5	BAG5 [Source:UniProtKB/TrEMBL%3BAcc:A0A178WFD4]	None
AT1G12080	-0.571558	0.00211711	0.0196397	310.36	3850	213.705	2520.67	NA	At1g12080 [Source:UniProtKB/TrEMBL%3BAcc:O65370]	None
AT1G12100	0.314595	0.686795	0.86471	3.15818	6.66667	3.87965	8.33333	NA	Bifunctional inhibitor/lipid-transfer protein/seed storage 2S albumin superfamily protein [Source:UniProtKB/TrEMBL%3BAcc:F4IC43]	None
AT1G12110	-0.0580057	0.397113	0.671308	138.541	5135.67	133.612	4793.33	NPF6.3	NRT1.1 [Source:UniProtKB/TrEMBL%3BAcc:A0A178W8F7]	None
AT1G12130	0.836912	0.0445172	0.18251	1.24432	22	2.23344	40	NA	Flavin-containing monooxygenase FMO GS-OX-like 6 [Source:UniProtKB/Swiss-Prot%3BAcc:Q9FWW3]	None
AT1G12140	-0.0410299	0.648976	0.845996	30.1274	886.333	29.2476	841	FMOGS-OX5	Flavin-containing monooxygenase FMO GS-OX5 [Source:UniProtKB/Swiss-Prot%3BAcc:A8MRX0]	None
AT1G12200	0.583694	2.13047e-09	1.50278e-07	24.7912	790.333	37.45	1160	NA	Flavin-containing monooxygenase [Source:UniProtKB/TrEMBL%3BAcc:A0A178W1K3]	None
AT1G12210	0.646785	0.225583	0.498949	0.357306	20.3333	0.567015	31	RFL1	Disease resistance protein RFL1 [Source:UniProtKB/Swiss-Prot%3BAcc:Q8L3R3]	None
AT1G12220	0.0611123	0.714858	0.879181	2.77035	161.333	2.99627	165.333	RPS5	Disease resistance protein [Source:UniProtKB/TrEMBL%3BAcc:Q56YM8]	None
AT1G12230	0.0949584	0.135818	0.371509	106.762	2353.67	114.258	2458	NA	Aldolase superfamily protein [Source:UniProtKB/TrEMBL%3BAcc:F4IC59]	None
AT1G12240	-0.0878801	0.273809	0.555076	56.8728	2506.33	54.7066	2314.67	BFRUCT4	Acid beta-fructofuranosidase 4%2C vacuolar [Source:UniProtKB/Swiss-Prot%3BAcc:Q39041]	None
AT1G12250	-0.104775	0.155699	0.403053	90.3861	1451	84.3397	1326.33	TL20.3	Thylakoid lumenal protein TL20.3%2C chloroplastic [Source:UniProtKB/Swiss-Prot%3BAcc:Q8H1Q1]	None
AT1G12270	-0.0808534	0.359589	0.640806	23.5768	914.667	22.6758	851.333	HOP1	Hop1 [Source:UniProtKB/TrEMBL%3BAcc:A0A178WM19]	None
AT1G12320	-0.445316	0.0877743	0.286331	4.72467	73	3.54472	53.6667	NA	Ankyrin repeat/KH domain protein (DUF1442) [Source:UniProtKB/TrEMBL%3BAcc:Q9LNB3]	None
AT1G12330	-0.350141	0.00387335	0.0310262	18.0926	454	14.3139	354	NA	Cyclin-dependent kinase-like protein [Source:UniProtKB/TrEMBL%3BAcc:Q9LNB2]	None
AT1G12340	0.148669	0.454579	0.717517	13.5483	99	15.3351	106.333	NA	Probable protein cornichon homolog 2 [Source:UniProtKB/Swiss-Prot%3BAcc:Q3EDD7]	None
AT1G12350	0.185435	0.0115479	0.0702841	29.1424	1265.67	32.8906	1412.33	PPCS1	Phosphopantothenate--cysteine ligase 1 [Source:UniProtKB/Swiss-Prot%3BAcc:Q8GXR5]	None
AT1G12390	0.150879	0.639082	0.840607	2.37014	31.6667	2.67065	34.6667	NA	Protein cornichon homolog 4 [Source:UniProtKB/Swiss-Prot%3BAcc:Q84W04]	None
AT1G12400	-1.63177	0.687318	NA	0.129934	0.666667	0	0	NA	Nucleotide excision repair%2C TFIIH%2C subunit TTDA [Source:TAIR%3BAcc:AT1G12400]	None
AT1G12410	-0.119772	0.0854254	0.281738	112.802	1977	104.783	1784	CLPR2	ATP-dependent Clp protease proteolytic subunit-related protein 2%2C chloroplastic [Source:UniProtKB/Swiss-Prot%3BAcc:Q9XJ36]	None
AT1G12450	0.320394	0.148964	0.393025	4.97701	84.6667	6.20855	105.333	NA	At1g12450 [Source:UniProtKB/TrEMBL%3BAcc:Q6NQK3]	None
AT1G12460	-0.126717	0.274356	0.555737	6.40596	316	5.89891	285.667	NA	Probable LRR receptor-like serine/threonine-protein kinase At1g12460 [Source:UniProtKB/Swiss-Prot%3BAcc:C0LGE4]	None
AT1G12470	0.0852898	0.383568	0.661642	13.9565	903.667	15.0406	936	VPS18	Vacuolar sorting protein 18 [Source:UniProtKB/Swiss-Prot%3BAcc:F4IDS7]	None
AT1G12550	0.387492	0.11956	0.345019	3.07365	55.6667	4.06909	71	HPR3	Glyoxylate/hydroxypyruvate reductase HPR3 [Source:UniProtKB/Swiss-Prot%3BAcc:Q9LE33]	None
AT1G12560	0.224604	0.392426	0.667379	7.06028	115.333	8.21922	130.333	EXPA7	Expansin [Source:UniProtKB/TrEMBL%3BAcc:A0A178W749]	None
AT1G12580	0.105963	0.199709	0.464652	21.1281	846.333	23.0231	897.667	PEPKR1	PEPKR1 [Source:UniProtKB/TrEMBL%3BAcc:A0A178WE53]	None
AT1G12630	-0.712323	0.395485	NA	0.566411	6.33333	0.352296	3.66667	ERF027	Ethylene-responsive transcription factor ERF027 [Source:UniProtKB/Swiss-Prot%3BAcc:Q38Q39]	None
AT1G12650	-0.204126	0.148951	0.393025	14.3638	252.667	12.8156	216	NA	At1g12650/T12C24_1 [Source:UniProtKB/TrEMBL%3BAcc:Q8W1E4]	None
AT1G12730	0.251991	0.101708	0.313652	6.63366	162	7.84191	191.667	NA	GPI transamidase subunit PIG-U [Source:UniProtKB/TrEMBL%3BAcc:Q94K70]	None
AT1G12740	0.345582	0.17678	0.433391	2.91582	97.6667	3.77292	118.333	CYP87A2	Cytochrome P450%2C family 87%2C subfamily A%2C polypeptide 2 [Source:UniProtKB/TrEMBL%3BAcc:Q9LN73]	None
AT1G12760	0.120084	0.159209	0.40848	29.5176	844.667	32.437	903.333	NA	E3 ubiquitin-protein ligase At1g12760 [Source:UniProtKB/Swiss-Prot%3BAcc:Q9LN71]	None
AT1G12770	-0.215022	0.0137093	0.0794239	29.2698	1177	25.632	991.667	RH47	DEAD-box ATP-dependent RNA helicase 47%2C mitochondrial [Source:UniProtKB/Swiss-Prot%3BAcc:Q8W4E1]	None
AT1G12775	-0.138525	0.637528	0.839615	1.19534	41.3333	1.1051	36.6667	NA	Pentatricopeptide repeat-containing protein At1g12775%2C mitochondrial [Source:UniProtKB/Swiss-Prot%3BAcc:Q9LPX2]	None
AT1G12810	0.171589	0.106982	0.322895	59.6246	444.667	65.6855	489.333	NA	Proline-rich family protein [Source:UniProtKB/TrEMBL%3BAcc:F4IDX2]	None
AT1G12840	-0.0552351	0.439394	0.707101	121.418	2685	118.753	2515	VHA-C	V-type proton ATPase subunit C [Source:UniProtKB/Swiss-Prot%3BAcc:Q9SDS7]	None
AT1G12855	-2.39569	0.304547	NA	0.0432807	1	0	0	NA	Putative F-box protein At1g12855 [Source:UniProtKB/Swiss-Prot%3BAcc:Q9LPW4]	None
AT1G12860	-0.323757	0.0128102	0.0757354	14.4845	379.667	11.6562	301.333	SCRM2	Transcription factor SCREAM2 [Source:UniProtKB/Swiss-Prot%3BAcc:Q9LPW3]	None
AT1G12880	-0.417779	0.0992694	0.308853	6.21525	81	4.62045	58.6667	NUDT12	NUDT12 [Source:UniProtKB/TrEMBL%3BAcc:A0A178WEE5]	None
AT1G12890	0.774159	0.647947	NA	0.151563	1.33333	0.289773	2	ERF088	Ethylene-responsive transcription factor ERF088 [Source:UniProtKB/Swiss-Prot%3BAcc:Q3E703]	None
AT1G12940	0.976142	0.0127053	0.0754783	0.650101	20.6667	1.28504	40.3333	NRT2.5	High affinity nitrate transporter 2.5 [Source:UniProtKB/Swiss-Prot%3BAcc:Q9LPV5]	None
AT1G12950	0.610662	0.0109744	0.0674889	2.29266	81	3.58675	118	DTX31	Protein DETOXIFICATION [Source:UniProtKB/TrEMBL%3BAcc:A0A178WCP4]	None
AT1G12970	0.189485	0.242851	0.520033	5.12536	136.333	5.9278	153	PIRL3	Plant intracellular Ras-group-related LRR protein 3 [Source:UniProtKB/Swiss-Prot%3BAcc:Q8W4Q3]	None
AT1G12980	0.65976	0.6579	NA	0.0806691	1.66667	0.137191	2.33333	ESR1	Ethylene-responsive transcription factor ESR1 [Source:UniProtKB/Swiss-Prot%3BAcc:Q9SAD4]	None
AT1G12990	0.0477254	0.679643	0.862492	10.9037	329	11.339	334.667	NA	Beta-1%2C4-N-acetylglucosaminyltransferase family protein [Source:UniProtKB/TrEMBL%3BAcc:F4HP06]	None
AT1G13040	0.0791673	0.639615	0.840607	4.19804	142	3.64099	149	NA	Pentatricopeptide repeat-containing protein At1g13040%2C mitochondrial [Source:UniProtKB/Swiss-Prot%3BAcc:Q9SAD9]	None
AT1G13060	0.0568836	0.426464	0.695396	101.281	1888.67	106.75	1920.33	PBE1	20S proteasome beta subunit E1 [Source:UniProtKB/TrEMBL%3BAcc:F4HP14]	None
AT1G13080	-0.31588	0.000582517	0.00695093	47.5577	1276.33	39.0574	997	CYP71B2	Cytochrome P450 71B2 [Source:UniProtKB/Swiss-Prot%3BAcc:O65788]	None
AT1G13090	-0.0418316	0.654405	0.849182	18.6628	528.333	18.4558	503	CYP71B28	Cytochrome P450 71B28 [Source:UniProtKB/Swiss-Prot%3BAcc:Q9SAE3]	None
AT1G13100	-0.020463	0.870811	0.953974	12.7482	324	12.7639	313	CYP71B29	Cytochrome P450 71B29 [Source:UniProtKB/Swiss-Prot%3BAcc:Q9SAE4]	None
AT1G13110	-0.0163791	0.827186	0.935515	80.3518	2331	80.8113	2247.33	CYP71B7	CYP71B7 [Source:UniProtKB/TrEMBL%3BAcc:A0A178WGC6]	None
AT1G13130	0.299208	0.648287	0.845767	0.339048	10.3333	0.430733	12	NA	At1g13130 [Source:UniProtKB/TrEMBL%3BAcc:Q66GP7]	None
AT1G13160	-0.104798	0.283047	0.565501	11.3725	520	10.7688	476.333	NA	ARM repeat superfamily protein [Source:UniProtKB/TrEMBL%3BAcc:Q0WVH7]	None
AT1G13180	0.278659	0.0551002	0.210682	4.88794	169.333	6.03744	200.333	ARP3	Actin-related protein 3 [Source:UniProtKB/Swiss-Prot%3BAcc:Q9SAF1]	None
AT1G13190	-0.212453	0.0115417	0.0702685	14.5393	718.333	12.7534	610.333	NA	F3F19.21 protein [Source:UniProtKB/TrEMBL%3BAcc:Q9SAF2]	None
AT1G13220	-0.159768	0.154721	0.401571	6.92855	554	6.51055	493	LINC2	nuclear matrix constituent protein-related [Source:TAIR%3BAcc:AT1G13220]	None
AT1G13230	-1.43253	0.176874	NA	0.238658	4.33333	0.0848829	1.66667	PII-2	Piriformospora indica-insensitive protein 2 [Source:UniProtKB/Swiss-Prot%3BAcc:Q5PP26]	None
AT1G13260	0.66441	1.00467e-09	7.59688e-08	22.4529	623	36.2715	970.333	RAV1	AP2/ERF and B3 domain-containing transcription factor RAV1 [Source:UniProtKB/Swiss-Prot%3BAcc:Q9ZWM9]	None
AT1G13270	-0.135269	0.133635	0.368364	43.2865	900.333	39.8688	802	MAP1B	Methionine aminopeptidase 1B%2C chloroplastic [Source:UniProtKB/Swiss-Prot%3BAcc:Q9FV52]	None
AT1G13280	0.142809	0.233987	0.509111	18.4869	284.667	20.505	308.333	AOC4	Allene oxide cyclase 4%2C chloroplastic [Source:UniProtKB/Swiss-Prot%3BAcc:Q93ZC5]	None
AT1G13300	0.858784	2.12706e-10	1.91476e-08	12.88	326	23.8538	577.667	HRS1	Transcription factor HRS1 [Source:UniProtKB/Swiss-Prot%3BAcc:Q9FX67]	None
AT1G13330	-0.310376	0.428685	0.697138	1.62799	28.6667	1.34218	23	HOP2	Homologous-pairing protein 2 homolog [Source:UniProtKB/Swiss-Prot%3BAcc:Q9FX64]	None
AT1G13400	-1.17474	0.353155	NA	0.406011	3	0.177998	1.33333	JGL	Zinc finger protein JAGGED-like [Source:UniProtKB/Swiss-Prot%3BAcc:Q6S592]	None
AT1G13410	-0.493972	0.0893664	0.288953	1.62295	54.3333	1.15317	38.3333	NA	Tetratricopeptide repeat (TPR)-like superfamily protein [Source:UniProtKB/TrEMBL%3BAcc:Q0WVP2]	None
AT1G13420	0.367885	0.418954	0.68945	6.8755	134.333	9.28922	163	SOT8	Cytosolic sulfotransferase 8 [Source:UniProtKB/Swiss-Prot%3BAcc:Q9FX56]	None
AT1G13430	-0.587095	0.00853987	0.0554769	6.43971	120	4.35686	78.3333	STO9	Cytosolic sulfotransferase 9 [Source:UniProtKB/Swiss-Prot%3BAcc:Q9FX55]	None
AT1G13460	-0.137679	0.222983	0.496148	12.4029	351.667	11.3798	315.333	B'THETA	Serine/threonine protein phosphatase 2A 57 kDa regulatory subunit B' theta isoform [Source:UniProtKB/Swiss-Prot%3BAcc:Q8LF36]	None
AT1G13590	0.110649	0.743137	0.894632	9.74745	52	10.8633	53.3333	PSK1	Phytosulfokines 1 [Source:UniProtKB/Swiss-Prot%3BAcc:Q9LMY9]	None
AT1G13607	0	1	NA	0	0	0	0	NA	Defensin-like protein 286 [Source:UniProtKB/Swiss-Prot%3BAcc:Q2L6T6]	None
AT1G13609	-2.53245	0.37035	NA	0.409543	1	0	0	NA	Defensin-like protein 287 [Source:UniProtKB/Swiss-Prot%3BAcc:Q2V4N4]	None
AT1G13620	-0.426465	0.76733	NA	0.281431	2.33333	0.221816	1.66667	RGF2	Root meristem growth factor 2 [Source:UniProtKB/Swiss-Prot%3BAcc:Q6DSU1]	None
AT1G13635	0.0554241	0.891041	0.962418	1.37698	25.3333	1.49118	25	NA	DNA glycosylase superfamily protein [Source:UniProtKB/TrEMBL%3BAcc:F4HSJ2]	None
AT1G13670	0.16079	0.167648	0.420322	26.3101	359	29.7608	392.667	NA	At1g13670 [Source:UniProtKB/TrEMBL%3BAcc:Q9LMY0]	None
AT1G13680	-0.383076	0.743583	NA	0.169031	3.33333	0.137871	2.33333	NA	F21F23.12 protein [Source:UniProtKB/TrEMBL%3BAcc:Q9LMX9]	None
AT1G13690	-0.181331	0.120097	0.345823	24.4777	361.333	22.0089	311.667	ATE1	ATE1 [Source:UniProtKB/TrEMBL%3BAcc:A0A178WKP3]	None
AT1G13730	-0.111077	0.27851	0.560878	18.8578	537.667	17.6333	493	NA	At1g13730 [Source:UniProtKB/TrEMBL%3BAcc:Q9LMX6]	None
AT1G13740	0.0384988	0.799816	0.922891	5.53434	176	5.86884	175.667	AFP2	AFP2 [Source:UniProtKB/TrEMBL%3BAcc:A0A178WBB1]	None
AT1G13770	0.21322	0.162495	0.412989	7.69122	171.333	8.90712	196.333	RUS3	RUS3 [Source:UniProtKB/TrEMBL%3BAcc:A0A178WJD5]	None
AT1G13780	0.373083	0.0914832	0.293165	2.78203	65.6667	3.60828	83.6667	NA	F-box/FBD/LRR-repeat protein At1g13780 [Source:UniProtKB/Swiss-Prot%3BAcc:Q56XS8]	None
AT1G13790	-0.465626	0.0201957	0.105231	1.93106	107.667	1.45685	76.6667	FDM4	Factor of DNA methylation 4 [Source:UniProtKB/Swiss-Prot%3BAcc:Q9LMH6]	None
AT1G13810	-0.286439	0.0850008	0.28087	7.72744	163.333	6.46667	130.333	NA	Restriction endonuclease%2C type II-like superfamily protein [Source:UniProtKB/TrEMBL%3BAcc:Q5XVK9]	None
AT1G13820	-0.179993	0.0305341	0.140855	42.292	907	37.471	793	NA	Alpha/beta-Hydrolases superfamily protein [Source:UniProtKB/TrEMBL%3BAcc:Q6NL07]	None
AT1G13880	-0.1794	0.120913	0.347092	13.7307	406	12.3703	350	NA	ELM2 domain-containing protein [Source:TAIR%3BAcc:AT1G13880]	None
AT1G13910	0.103833	0.590078	0.81014	5.4571	106.333	5.8444	114.333	NA	Leucine-rich repeat (LRR) family protein [Source:UniProtKB/TrEMBL%3BAcc:Q8GYK0]	None
AT1G13920	-0.0948645	0.724578	0.884104	2.62978	55	2.51214	50.6667	NA	Remorin family protein [Source:TAIR%3BAcc:AT1G13920]	None
AT1G13930	0.473786	6.04828e-14	1.03006e-11	703.519	6675	981.473	9036	NA	At1g13930/F16A14.27 [Source:UniProtKB/TrEMBL%3BAcc:Q9XI93]	None
AT1G13950	0.625674	0.00318629	0.0267349	10.8733	95.6667	17.0466	143.667	ELF5A-1	Eukaryotic translation initiation factor 5A [Source:UniProtKB/TrEMBL%3BAcc:A0A178WBN7]	None
AT1G13960	0.344787	0.00751704	0.0499311	9.01391	319	11.6355	393.667	WRKY4	Probable WRKY transcription factor 4 [Source:UniProtKB/Swiss-Prot%3BAcc:Q9XI90]	None
AT1G13980	0.328114	1.03366e-05	0.000260884	28.1129	1547	38.0173	1907.33	GN	ARF guanine-nucleotide exchange factor GNOM [Source:UniProtKB/Swiss-Prot%3BAcc:Q42510]	None
AT1G14000	-0.0698319	0.431103	0.699353	39.5502	1225.33	38.2432	1141.67	VIK	At1g14000 [Source:UniProtKB/TrEMBL%3BAcc:Q9XI87]	None
AT1G14020	0.0227508	0.849807	0.944761	10.7049	368.667	10.9738	368.667	OFUT3	O-fucosyltransferase 3 [Source:UniProtKB/Swiss-Prot%3BAcc:Q6NQ51]	None
AT1G14040	0.312321	0.0348153	0.154858	5.23354	187.333	6.47523	230.333	PHO1%3BH3	Phosphate transporter PHO1 homolog 3 [Source:UniProtKB/Swiss-Prot%3BAcc:Q6R8G7]	None
AT1G14070	0.484076	0.00146298	0.0145406	8.23584	164	11.6442	225.333	NA	NA	None
AT1G14080	0.334226	0.145081	0.386543	2.41857	63.3333	3.0892	78.3333	FUT6	Fucosyltransferase 6 [Source:UniProtKB/Swiss-Prot%3BAcc:Q9XI80]	None
AT1G14100	-0.00310749	0.998995	NA	0.0140046	0.333333	0.0183773	0.333333	FUT8	Glycosyltransferase (Fragment) [Source:UniProtKB/TrEMBL%3BAcc:W8PVC8]	None
AT1G14150	-0.324491	6.68617e-05	0.00124527	132.466	1638	106.096	1288.33	PNSL2	Photosynthetic NDH subunit of lumenal location 2%2C chloroplastic [Source:UniProtKB/Swiss-Prot%3BAcc:Q9XI73]	None
AT1G14180	-0.182782	0.381118	0.660463	3.77132	98.3333	3.33569	86	NA	Putative mandelonitrile lyase [Source:UniProtKB/TrEMBL%3BAcc:Q8GXX6]	None
AT1G14185	-0.350821	0.224242	0.497603	1.74367	53.6667	1.39032	41	NA	At1g14180/F7A19_27 [Source:UniProtKB/TrEMBL%3BAcc:Q9XI69]	None
AT1G14190	0.848508	0.475968	NA	0.0765728	3.33333	0.167914	5.66667	NA	Glucose-methanol-choline (GMC) oxidoreductase family protein [Source:TAIR%3BAcc:AT1G14190]	None
AT1G14205	-0.0371794	0.904795	0.966734	6.22651	39.3333	6.14911	37.6667	NA	Ribosomal L18p/L5e family protein [Source:TAIR%3BAcc:AT1G14205]	None
AT1G14230	0.463376	7.32031e-05	0.00134353	9.24285	275.333	12.9015	372	APY4	Probable apyrase 4 [Source:UniProtKB/Swiss-Prot%3BAcc:Q8H1D8]	None
AT1G14240	0.403305	0.0900822	0.290257	2.32994	64	2.78233	81.6667	APY3	Probable apyrase 3 [Source:UniProtKB/Swiss-Prot%3BAcc:Q9XI62]	None
AT1G14250	0.490136	0.164621	0.415985	0.78712	26.3333	1.15764	36.3333	APY5	Probable apyrase 5 [Source:UniProtKB/Swiss-Prot%3BAcc:Q6NQA8]	None
AT1G14260	-0.224912	0.577082	0.803266	1.12774	23.6667	0.962524	20	NA	At1g14260 [Source:UniProtKB/TrEMBL%3BAcc:Q4PS45]	None
AT1G14280	-0.0888442	0.357726	0.638783	27.4757	624.333	26.3374	580.667	PKS2	Protein PHYTOCHROME KINASE SUBSTRATE 2 [Source:UniProtKB/Swiss-Prot%3BAcc:Q9M9T4]	None
AT1G14310	-0.144252	0.39064	0.666004	10.8684	139	9.96531	123.667	NA	F14L17.7 protein [Source:UniProtKB/TrEMBL%3BAcc:Q9M9T1]	None
AT1G14320	-0.266194	0.000341932	0.00455846	739.686	11281.3	620.447	9178.33	RPL10A	60S ribosomal protein L10-1 [Source:UniProtKB/Swiss-Prot%3BAcc:Q93VT9]	None
AT1G14340	-0.0837423	0.515439	0.763565	18.2779	257.333	17.347	239	NA	RNA-binding (RRM/RBD/RNP motifs) family protein [Source:UniProtKB/TrEMBL%3BAcc:Q949S4]	None
AT1G14345	-0.334134	7.47215e-07	2.75348e-05	224.284	2059.67	178.231	1599.67	NA	NAD(P)-linked oxidoreductase superfamily protein [Source:UniProtKB/TrEMBL%3BAcc:Q949S6]	None
AT1G14350	-0.167126	0.147886	0.391328	12.4979	436.667	11.2718	387.333	MYB124	MYB124 [Source:UniProtKB/TrEMBL%3BAcc:A0A178W3Z3]	None
AT1G14370	0.471057	0.0075212	0.0499406	6.04155	165.667	8.44945	226	PBL2	PBL2 [Source:UniProtKB/TrEMBL%3BAcc:A0A178WI52]	None
AT1G14390	0.433327	0.0875536	0.285906	1.69343	58	2.36169	76	NA	Probable LRR receptor-like serine/threonine-protein kinase At1g14390 [Source:UniProtKB/Swiss-Prot%3BAcc:Q9M9S4]	None
AT1G14430	0.108584	0.50983	0.759539	6.86789	215.333	7.38676	233.333	NA	F14L17.20 protein [Source:UniProtKB/TrEMBL%3BAcc:Q9M9S1]	None
AT1G14470	0.18813	0.372115	0.651943	2.08282	84.3333	2.17455	95.6667	PCMP-A4	Pentatricopeptide repeat-containing protein At1g14470 [Source:UniProtKB/Swiss-Prot%3BAcc:Q9M9R6]	None
AT1G14500	0.55277	0.784359	NA	0.0564117	1.33333	0.0891404	1.66667	NA	Ankyrin repeat family protein [Source:UniProtKB/TrEMBL%3BAcc:Q9M9R3]	None
AT1G14550	-1.13711	0.0288866	0.135362	1.42127	21.3333	0.648869	9.66667	PER5	Peroxidase 5 [Source:UniProtKB/Swiss-Prot%3BAcc:Q9M9Q9]	None
AT1G14560	0.0224915	0.857179	0.94833	9.2614	275.333	9.42184	278	COAC1	Mitochondrial carrier protein CoAc1 [Source:UniProtKB/Swiss-Prot%3BAcc:F4HW79]	None
AT1G14570	0.00649582	0.927397	0.975122	44.6684	1353.33	45.0023	1336.67	PUX7	Plant UBX domain-containing protein 7 [Source:UniProtKB/Swiss-Prot%3BAcc:Q94JZ8]	None
AT1G14580	-0.0918608	0.325189	0.606849	25.5518	593.667	23.2022	552	NA	C2H2-like zinc finger protein [Source:TAIR%3BAcc:AT1G14580]	None
AT1G14630	-0.31972	0.338371	0.62031	3.23902	35.3333	2.60198	28	NA	unknown protein%3B BEST Arabidopsis thaliana protein match is: unknown protein (TAIR:AT2G01990.1)%3B Ha. [Source:TAIR%3BAcc:AT1G14630]	None
AT1G14640	-0.34836	0.0707822	0.249407	2.65521	139.667	2.05232	110.333	NA	SWAP (Suppressor-of-White-APricot)/surp domain-containing protein [Source:UniProtKB/TrEMBL%3BAcc:F4HW92]	None
AT1G14650	-0.00524779	0.948762	0.98297	26.7685	1460	26.9844	1426	NA	Probable splicing factor 3A subunit 1 [Source:UniProtKB/Swiss-Prot%3BAcc:Q8RXF1]	None
AT1G14670	0.0381594	0.59372	0.812545	76.4586	2328	78.8873	2334	TMN2	Transmembrane 9 superfamily member 2 [Source:UniProtKB/Swiss-Prot%3BAcc:Q940S0]	None
AT1G14680	0.359607	0.455952	0.718333	1.02182	13.6667	1.3624	17.3333	NA	Early endosome antigen [Source:UniProtKB/TrEMBL%3BAcc:Q9LE70]	None
AT1G14685	0.0396326	0.67289	0.858437	29.5486	628.667	30.5033	640	BPC2	BPC2 [Source:UniProtKB/TrEMBL%3BAcc:A0A178W364]	None
AT1G14687	0.0303204	0.914873	0.971344	3.89789	44	3.94358	45.3333	ZHD14	ZHD14 [Source:UniProtKB/TrEMBL%3BAcc:A0A178W745]	None
AT1G14700	-0.10259	0.318444	0.600513	29.1234	551	27.2979	506	PAP3	Purple acid phosphatase 3 [Source:UniProtKB/Swiss-Prot%3BAcc:Q8H129]	None
AT1G14730	0.16588	0.26579	0.546141	17.2997	215.333	19.3813	236.333	CYB561C	Probable transmembrane ascorbate ferrireductase 3 [Source:UniProtKB/Swiss-Prot%3BAcc:Q67ZF6]	None
AT1G14780	0.242471	0.248721	0.527192	2.23488	85	2.6744	98	NA	MACPF domain-containing protein At1g14780 [Source:UniProtKB/Swiss-Prot%3BAcc:Q8L612]	None
AT1G14860	0.272126	0.148381	0.392151	9.89491	144.333	12.3978	166.333	NUDT18	Nudix hydrolase 18%2C mitochondrial [Source:UniProtKB/Swiss-Prot%3BAcc:Q9LQU5]	None
AT1G14890	-0.0293209	0.801488	0.923665	39.6785	627	39.1077	604	NA	Plant invertase/pectin methylesterase inhibitor superfamily protein [Source:UniProtKB/TrEMBL%3BAcc:F4HXW0]	None
AT1G14920	0.0171571	0.864878	0.951357	28.5356	920.333	29.0674	915.333	GAI	DELLA protein GAI [Source:UniProtKB/Swiss-Prot%3BAcc:Q9LQT8]	None
AT1G15000	-0.0202863	0.844808	0.942587	19.8063	538	19.7168	527	SCPL50	Serine carboxypeptidase-like 50 [Source:UniProtKB/Swiss-Prot%3BAcc:Q9M9Q6]	None
AT1G15010	0.626733	0.248339	0.526779	2.06817	14.6667	3.40784	20.6667	NA	Mediator of RNA polymerase II transcription subunit [Source:UniProtKB/TrEMBL%3BAcc:Q8LCU9]	None
AT1G15015	-0.00310747	0.999392	NA	0.0302217	0.333333	0.035331	0.333333	NA	F-box protein At1g15015 [Source:UniProtKB/Swiss-Prot%3BAcc:Q9M9Q4]	None
AT1G15030	-0.168307	0.0889979	0.28853	23.7464	537.667	21.2923	473.333	NA	T15D22.8 [Source:UniProtKB/TrEMBL%3BAcc:Q9M9Q2]	None
AT1G15080	-0.0915999	0.690259	0.86633	4.59659	83	4.31804	76.6667	LPP2	Lipid phosphate phosphatase 2 [Source:UniProtKB/Swiss-Prot%3BAcc:Q9XI60]	None
AT1G15110	0.0978532	0.453218	0.716417	9.24535	297	9.93328	314.667	NA	Phosphatidyl serine synthase family protein [Source:UniProtKB/TrEMBL%3BAcc:F4HXY6]	None
AT1G15120	-0.104969	0.221922	0.494544	221.608	1368.33	209.584	1234	NA	Ubiquinol-cytochrome C reductase hinge protein [Source:UniProtKB/TrEMBL%3BAcc:F4HXY8]	None
AT1G15125	0.160083	0.486417	0.741132	43.7383	707.333	48.5013	758.333	NA	F9L1.6 [Source:UniProtKB/TrEMBL%3BAcc:Q9XI57]	None
AT1G15150	0.0383763	0.947248	0.982593	0.387625	9.33333	0.400534	9.33333	DTX10	Protein DETOXIFICATION 10 [Source:UniProtKB/Swiss-Prot%3BAcc:Q8VYL8]	None
AT1G15160	-0.171921	0.648536	0.845831	0.926578	29.6667	0.81651	26.3333	DTX11	Protein DETOXIFICATION 11 [Source:UniProtKB/Swiss-Prot%3BAcc:F4HZH9]	None
AT1G15170	0.0276503	0.833347	0.937937	10.8119	283	11.3145	284.667	DTX12	Protein DETOXIFICATION [Source:UniProtKB/TrEMBL%3BAcc:A0A178WNL0]	None
AT1G15180	-0.109676	0.24527	0.522915	32.6076	749.333	30.3553	686.667	DTX13	Protein DETOXIFICATION 13 [Source:UniProtKB/Swiss-Prot%3BAcc:Q94AL1]	None
AT1G15190	1.0694	0.0274753	0.130468	0.982344	10.6667	2.04699	22	FLA19	Fasciclin-like arabinogalactan protein 19 [Source:UniProtKB/Swiss-Prot%3BAcc:Q5Q0H2]	None
AT1G15215	0.16807	0.395613	0.669757	5.88162	96.6667	6.63909	106.333	NA	SHH1 [Source:UniProtKB/TrEMBL%3BAcc:A0A384LAK3]	None
AT1G15240	0.0903482	0.376142	0.655776	11.6812	794.333	12.6195	840.667	NA	Phox (PX) domain-containing protein [Source:UniProtKB/TrEMBL%3BAcc:F4HZJ6]	None
AT1G15260	-0.339725	0.000945756	0.0102632	51.7437	541.333	41.6124	419.333	NA	LOW protein: ATP-dependent RNA helicase-like protein [Source:UniProtKB/TrEMBL%3BAcc:Q8VY60]	None
AT1G15280	-0.0513015	0.506299	0.756847	24.9561	1341.67	24.299	1277.67	NA	CASC3/Barentsz eIF4AIII binding protein [Source:UniProtKB/TrEMBL%3BAcc:Q8H1F3]	None
AT1G15330	2.32282	0.0638209	NA	0.0487034	1	0.271458	4.66667	PV42A	SNF1-related protein kinase regulatory subunit gamma-like PV42a [Source:UniProtKB/Swiss-Prot%3BAcc:Q9XI37]	None
AT1G15360	-0.216386	0.893077	NA	0.156332	2	0.131229	1.66667	WIN1	Ethylene-responsive transcription factor WIN1 [Source:UniProtKB/Swiss-Prot%3BAcc:Q9XI33]	None
AT1G15370	-0.100778	0.312349	0.593969	48.5956	520	46.3647	475.667	NA	F9L1.32 protein [Source:UniProtKB/TrEMBL%3BAcc:Q9XI32]	None
AT1G15390	-0.114993	0.290309	0.572262	31.3162	468.667	29.1788	425	PDF1A	Peptide deformylase [Source:UniProtKB/TrEMBL%3BAcc:A0A178WDP8]	None
AT1G15410	-0.13115	0.166173	0.418176	12.9632	571.333	11.5652	513	NA	Aspartate-glutamate racemase family [Source:UniProtKB/TrEMBL%3BAcc:Q9XI28]	None
AT1G15430	0.0343477	0.814714	0.929768	9.22797	203	9.68939	202	NA	Uncharacterized protein At1g15430 [Source:UniProtKB/TrEMBL%3BAcc:Q9C5E6]	None
AT1G15470	-0.266787	0.0252656	0.122845	11.5914	307.667	9.67868	251.667	NA	F9L1.42 protein [Source:UniProtKB/TrEMBL%3BAcc:Q9XI22]	None
AT1G15480	-0.173309	0.195249	0.458229	6.44843	270.667	5.80803	235	NA	Pentatricopeptide repeat-containing protein At1g15480%2C mitochondrial [Source:UniProtKB/Swiss-Prot%3BAcc:Q9XI21]	None
AT1G15500	0.21178	0.000931893	0.0101478	170.63	6271	198.621	7149	AATP2	ADP%2CATP carrier protein [Source:UniProtKB/TrEMBL%3BAcc:A0A178WDN7]	None
AT1G15510	-0.364665	0.0103904	0.0647185	5.34323	269	4.17363	207	PCMP-H73	Pentatricopeptide repeat-containing protein At1g15510%2C chloroplastic [Source:UniProtKB/Swiss-Prot%3BAcc:Q9M9E2]	None
AT1G15540	2.49737	0.171577	NA	0.0300707	0.333333	0.138637	2	NA	2-oxoglutarate (2OG) and Fe(II)-dependent oxygenase superfamily protein [Source:TAIR%3BAcc:AT1G15540]	None
AT1G15570	0.0299444	0.838839	0.940431	7.37528	210.667	7.5257	212.667	CYCA2-3	CYCA2 [Source:UniProtKB/TrEMBL%3BAcc:A0A178WNJ4]	None
AT1G15630	0.219811	0.605234	0.819649	1.42569	20.3333	1.68884	23	NA	Transmembrane protein [Source:UniProtKB/TrEMBL%3BAcc:Q5BQ07]	None
AT1G15640	-0.0803913	0.809498	0.927757	2.3589	34	2.25263	31.3333	NA	T16N11.15 protein [Source:UniProtKB/TrEMBL%3BAcc:Q9M9D1]	None
AT1G15660	-0.154616	0.214535	0.485581	6.93731	322	6.28538	285	CENP-C	Centromere protein C [Source:UniProtKB/Swiss-Prot%3BAcc:Q66LG9]	None
AT1G15670	0.589722	5.33995e-06	0.000151571	25.4818	654	38.8231	942.667	NA	F-box/kelch-repeat protein At1g15670 [Source:UniProtKB/Swiss-Prot%3BAcc:Q9LMR5]	None
AT1G15690	-0.0671408	0.249684	0.528289	397.7	17300.3	380.862	16222.7	AVP1	VHP1 [Source:UniProtKB/TrEMBL%3BAcc:A0A178WA14]	None
AT1G15710	-0.283684	0.0134067	0.0781039	22.2475	363.333	18.3436	292	TYRAAT2	Arogenate dehydrogenase 2%2C chloroplastic [Source:UniProtKB/Swiss-Prot%3BAcc:Q9LMR3]	None
AT1G15720	0.221406	0.625613	0.832155	0.614647	16.3333	0.713992	19.3333	TRFL5	At1g15720 [Source:UniProtKB/TrEMBL%3BAcc:Q9LMR2]	None
AT1G15740	0.325572	0.000224193	0.00324805	32.0735	1141	40.6483	1396	NA	Leucine-rich repeat family protein [Source:UniProtKB/TrEMBL%3BAcc:Q8H1Q4]	None
AT1G15760	0.283602	0.564099	0.793936	1.99217	14	2.46553	16.6667	NA	At1g15760 [Source:UniProtKB/TrEMBL%3BAcc:Q9LMQ8]	None
AT1G15810	-0.0105203	0.912635	0.970482	19.7148	601.667	19.9217	582	NA	At1g15810/F7H2_23 [Source:UniProtKB/TrEMBL%3BAcc:Q9LMQ3]	None
AT1G15830	0.0042009	0.985085	0.995381	2.1605	109.667	2.18894	107.667	NA	unknown protein%3B Ha. [Source:TAIR%3BAcc:AT1G15830]	None
AT1G15840	-1.11287	0.168417	NA	0.33425	9	0.158955	4	NA	unknown protein%3B Ha. [Source:TAIR%3BAcc:AT1G15840]	None
AT1G15860	-0.0210496	0.832444	0.937743	33.5813	526.667	33.5652	507.333	NA	Defective in cullin neddylation protein [Source:UniProtKB/TrEMBL%3BAcc:F4I181]	None
AT1G15870	0.0169095	0.940532	0.979874	5.22478	75	5.40133	74	NA	At1g15870/F7H2_19 [Source:UniProtKB/TrEMBL%3BAcc:Q9LMP8]	None
AT1G15900	-0.0627197	0.906273	0.967373	6.43489	12	6.14227	11.3333	NA	unknown protein%3B Ha. [Source:TAIR%3BAcc:AT1G15900]	None
AT1G15910	0.0692047	0.499011	0.75053	9.91682	499.333	10.5823	519.667	FDM1	IDP1 [Source:UniProtKB/TrEMBL%3BAcc:A0A178W3T4]	None
AT1G15920	0.276315	0.0228226	0.114836	13.2272	290.333	15.8114	346.667	CAF1-2	Probable CCR4-associated factor 1 homolog 2 [Source:UniProtKB/Swiss-Prot%3BAcc:Q9S9P2]	None
AT1G15930	-0.119252	0.171792	0.426024	401.96	3935	369.043	3529.67	RPS12A	40S ribosomal protein S12-1 [Source:UniProtKB/Swiss-Prot%3BAcc:Q9S9P1]	None
AT1G15940	0.169793	0.118382	0.34292	8.95848	603.333	10.2105	677.333	NA	T24D18.4 [Source:UniProtKB/TrEMBL%3BAcc:Q9S9P0]	None
AT1G15950	-0.0164102	0.79521	0.920892	85.6048	1995.67	86.0214	1946.33	CCR1	Cinnamoyl-CoA reductase 1 [Source:UniProtKB/Swiss-Prot%3BAcc:Q9S9N9]	None
AT1G15980	-0.398455	1.69861e-08	9.84983e-07	143.417	3784.67	110.035	2853	PNSB1	Photosynthetic NDH subunit of subcomplex B 1%2C chloroplastic [Source:UniProtKB/Swiss-Prot%3BAcc:Q9S9N6]	None
AT1G16000	-0.0751051	0.602099	0.818031	42.5512	315	41.1413	286.667	NA	GAG1At protein [Source:UniProtKB/TrEMBL%3BAcc:P93048]	None
AT1G16020	-0.225385	0.041498	0.174367	12.6879	435	10.9187	368.333	CCZ1A	Vacuolar fusion protein CCZ1 homolog A [Source:UniProtKB/Swiss-Prot%3BAcc:F4I2S4]	None
AT1G16025	-0.00310748	0.999203	NA	0.239241	0.333333	0.247078	0.333333	NA	Putative uncharacterized protein [Source:UniProtKB/TrEMBL%3BAcc:Q5XVK8]	None
AT1G16040	-0.048641	0.760693	0.90384	15.6167	188.667	15.2021	180	NA	At1g16040 [Source:UniProtKB/TrEMBL%3BAcc:Q8GWH6]	None
AT1G16060	0.270255	0.175851	0.432175	4.6626	92.6667	6.0413	109	ADAP	AP2-like ethylene-responsive transcription factor At1g16060 [Source:UniProtKB/Swiss-Prot%3BAcc:Q94AN4]	None
AT1G16080	-0.3656	1.51834e-07	6.70623e-06	94.6286	2035.33	74.2264	1562.33	NA	Nuclear protein [Source:UniProtKB/TrEMBL%3BAcc:Q9S9M7]	None
AT1G16090	-0.768101	0.00547775	0.0398428	2.74416	61.6667	1.6211	36	WAKL7	Wall associated kinase-like 7 [Source:UniProtKB/TrEMBL%3BAcc:F4I2T5]	None
AT1G16110	0.758423	1.71373e-06	5.5831e-05	2.97191	128.667	5.18032	212.667	WAKL6	Wall-associated receptor kinase-like 6 [Source:UniProtKB/Swiss-Prot%3BAcc:Q8GXQ3]	None
AT1G16120	0.10729	0.63214	0.836178	1.42593	85	1.75407	88.6667	WAKL1	Wall-associated receptor kinase-like 1 [Source:UniProtKB/Swiss-Prot%3BAcc:Q9S9M5]	None
AT1G16150	0.059702	0.847568	0.943772	0.803247	38.3333	0.838687	39	WAKL4	Wall-associated receptor kinase-like 4 [Source:UniProtKB/Swiss-Prot%3BAcc:Q9S9M2]	None
AT1G16160	-0.929939	0.288126	NA	0.174278	7.33333	0.0952342	3.66667	WAKL5	WAKL5 [Source:UniProtKB/TrEMBL%3BAcc:A0A178W9G0]	None
AT1G16180	0.197224	0.0096543	0.0611611	101.732	2191	117.352	2436.67	NA	Serinc-domain containing serine and sphingolipid biosynthesis protein [Source:UniProtKB/TrEMBL%3BAcc:Q9S9L9]	None
AT1G16190	-0.187177	0.155808	0.40306	17.5542	411	15.5309	354	RAD23A	RAD23A [Source:UniProtKB/TrEMBL%3BAcc:A0A178W4Q3]	None
AT1G16220	0.00475244	0.983293	0.994925	2.52072	68.6667	2.54439	68.3333	NA	Probable protein phosphatase 2C 6 [Source:UniProtKB/Swiss-Prot%3BAcc:Q9SA22]	None
AT1G16250	0.134101	0.369722	0.649798	5.3765	165.667	5.9308	180	NA	F-box/kelch-repeat protein At1g16250 [Source:UniProtKB/Swiss-Prot%3BAcc:Q0WW40]	None
AT1G16270	-0.192221	0.0251595	0.122558	11.3971	888.333	10.024	763	NA	F3O9.7 protein [Source:UniProtKB/TrEMBL%3BAcc:Q9SA26]	None
AT1G16300	0.0103658	0.93184	0.976689	11.3722	298.667	11.605	293.333	GAPCP2	Glyceraldehyde-3-phosphate dehydrogenase GAPCP2%2C chloroplastic [Source:UniProtKB/Swiss-Prot%3BAcc:Q5E924]	None
AT1G16310	0.195718	0.398659	0.67252	4.05139	77	4.60312	89.3333	MTP10	Metal tolerance protein 10 [Source:UniProtKB/Swiss-Prot%3BAcc:Q0WU02]	None
AT1G16320	-0.232384	0.00713176	0.0481668	57.2029	836.667	49.0897	699	NA	At1g16320/F3O9_12 [Source:UniProtKB/TrEMBL%3BAcc:Q9SA31]	None
AT1G16350	-0.13389	0.0988756	0.308338	46.4543	1455.67	42.9477	1301.67	NA	Inosine-5'-monophosphate dehydrogenase 2 [Source:UniProtKB/Swiss-Prot%3BAcc:Q9SA34]	None
AT1G16370	0.104977	0.65584	0.849876	2.92879	67.3333	3.1779	71	44110	Organic cation/carnitine transporter 6 [Source:UniProtKB/Swiss-Prot%3BAcc:Q9SA36]	None
AT1G16390	-0.116043	0.454745	0.717517	6.46533	176.333	5.9181	160.667	44107	Organic cation/carnitine transporter 3 [Source:UniProtKB/Swiss-Prot%3BAcc:Q9SA38]	None
AT1G16400	0.513306	8.89122e-07	3.17731e-05	14.1556	484.667	20.4728	681.667	CYP79F2	Hexahomomethionine N-hydroxylase [Source:UniProtKB/Swiss-Prot%3BAcc:Q9FUY7]	None
AT1G16410	0.312669	0.00389167	0.031121	32.275	1049.67	40.5493	1278.67	CYP79F1	Dihomomethionine N-hydroxylase [Source:UniProtKB/Swiss-Prot%3BAcc:Q949U1]	None
AT1G16430	-0.23694	0.241779	0.51862	17.3153	136.667	15.038	112.667	MED22A	Mediator of RNA polymerase II transcription subunit 22a [Source:UniProtKB/Swiss-Prot%3BAcc:Q9SA42]	None
AT1G16440	0.496906	0.367057	0.647599	0.601453	18	0.896787	23.3333	RHS3	Serine/threonine-protein kinase RHS3 [Source:UniProtKB/Swiss-Prot%3BAcc:F4I4F2]	None
AT1G16445	-0.0862395	0.718738	0.880805	8.30532	111.667	7.83529	101.667	NA	S-adenosyl-L-methionine-dependent methyltransferases superfamily protein [Source:UniProtKB/TrEMBL%3BAcc:Q8GUP2]	None
AT1G16470	0.0399068	0.624778	0.831806	72.4846	1053	75.2229	1059.33	PAB1	Proteasome subunit alpha type [Source:UniProtKB/TrEMBL%3BAcc:A0A178WA13]	None
AT1G16500	-0.051562	0.792995	0.920075	6.22571	98	6.093	92.3333	NA	>F3O9.30 [Source:UniProtKB/TrEMBL%3BAcc:Q9SA48]	None
AT1G16520	-0.153041	0.186846	0.446487	16.4192	344.667	14.8459	306.333	NA	At1g16520 [Source:UniProtKB/TrEMBL%3BAcc:Q9SA50]	None
AT1G16540	0.119457	0.454204	0.717256	3.92063	198.333	4.31415	211.333	SIR3	molybdenum cofactor sulfurase (LOS5) (ABA3) [Source:TAIR%3BAcc:AT1G16540]	None
AT1G16560	0.0146237	0.86102	0.949559	30.7549	714.333	31.2289	708	NA	AT1G16560 protein [Source:UniProtKB/TrEMBL%3BAcc:Q9FX73]	None
AT1G16590	0.101824	0.6386	0.840324	5.59637	84.6667	6.07248	89	REV7	DNA polymerase zeta processivity subunit [Source:UniProtKB/Swiss-Prot%3BAcc:Q94FL5]	None
AT1G16640	0.0808654	0.848578	0.944316	2.29747	20	2.45311	21	NA	Uncharacterized protein At1g16640 (Fragment) [Source:UniProtKB/TrEMBL%3BAcc:C0SUV7]	None
AT1G16650	0.312416	0.0491966	0.195792	4.88568	141.333	6.15493	172	NA	S-adenosyl-L-methionine-dependent methyltransferases superfamily protein [Source:TAIR%3BAcc:AT1G16650]	None
AT1G16670	-0.173902	0.243856	0.521422	7.29113	226	6.50336	198.333	CRPK1	Cold-responsive protein kinase 1 [Source:UniProtKB/Swiss-Prot%3BAcc:Q93YN1]	None
AT1G16680	0.154087	0.113501	0.333948	10.0589	605.667	11.5944	664.667	NA	Chaperone DnaJ-domain superfamily protein [Source:UniProtKB/TrEMBL%3BAcc:F4I4I3]	None
AT1G16700	0.0184592	0.813235	0.929187	58.57	998.667	60.0461	987.667	NA	NADH dehydrogenase [ubiquinone] iron-sulfur protein 8-B%2C mitochondrial [Source:UniProtKB/Swiss-Prot%3BAcc:Q9FX83]	None
AT1G16705	-0.811748	0.540606	NA	0.265316	3	0.150006	1.66667	NA	p300/CBP acetyltransferase-related protein-like protein [Source:UniProtKB/TrEMBL%3BAcc:F4I4I6]	None
AT1G16710	0.00508435	0.958025	0.986143	6.11087	771.333	6.15809	764.667	HAC12	Histone acetyltransferase HAC12 [Source:UniProtKB/Swiss-Prot%3BAcc:Q9FWQ5]	None
AT1G16720	-0.537773	2.64594e-11	2.79435e-09	169.871	6478.67	118.621	4437.67	HCF173	high chlorophyll fluorescence phenotype 173 [Source:TAIR%3BAcc:AT1G16720]	None
AT1G16740	-0.0208302	0.854274	0.947041	55.4897	513.667	56.8564	493.333	NA	50S ribosomal protein L20 [Source:UniProtKB/TrEMBL%3BAcc:A0A178WF80]	None
AT1G16770	-0.829169	0.554145	NA	0.106151	2.33333	0.0294926	1.33333	NA	F17F16.3 protein [Source:UniProtKB/TrEMBL%3BAcc:Q9FWR1]	None
AT1G16790	-0.181321	0.269903	0.551297	25.4277	242.667	22.66	211.667	NA	At1g16790 [Source:UniProtKB/TrEMBL%3BAcc:Q6NQG3]	None
AT1G16810	0.119036	0.194237	0.457211	59.7466	728.667	67.5719	773	NA	7-dehydrocholesterol reductase-like protein [Source:UniProtKB/TrEMBL%3BAcc:Q9FZ43]	None
AT1G16825	-0.231279	0.316594	0.598848	8.75198	79.3333	7.38844	66.3333	RTNLB23	Reticulon-like protein B23 [Source:UniProtKB/Swiss-Prot%3BAcc:P0C941]	None
AT1G16830	-0.187887	0.590506	0.810376	1.07789	31.3333	0.939635	27.3333	NA	Putative pentatricopeptide repeat-containing protein At1g16830 [Source:UniProtKB/Swiss-Prot%3BAcc:Q3EDA9]	None
AT1G16860	0.111539	0.17246	0.426948	22.107	843	24.1031	895.667	NA	Uncharacterized membrane protein At1g16860 [Source:UniProtKB/Swiss-Prot%3BAcc:Q9FZ45]	None
AT1G16880	-0.252559	9.6123e-06	0.000245224	420.428	7096.67	354.257	5875.67	ACR11	ACR11 [Source:UniProtKB/TrEMBL%3BAcc:A0A178WLF3]	None
AT1G16910	1.47987	0.613166	NA	0.0219168	0.333333	0.0696574	1	LSH8	Protein LIGHT-DEPENDENT SHORT HYPOCOTYLS 8 [Source:UniProtKB/Swiss-Prot%3BAcc:Q9FZ51]	None
AT1G16930	0.0321834	0.849474	0.944579	5.70314	127.333	5.91263	128.333	NA	F-box/FBD/LRR-repeat protein At1g16930 [Source:UniProtKB/Swiss-Prot%3BAcc:Q9FZ52]	None
AT1G16960	-0.130843	0.551289	0.786826	10.1655	94.6667	9.45753	85.3333	NA	At1g16960 [Source:UniProtKB/TrEMBL%3BAcc:Q9FZ55]	None
AT1G17020	0.450015	0.0238846	0.118166	4.03806	92	5.6415	122.333	SRG1	Protein SRG1 [Source:UniProtKB/Swiss-Prot%3BAcc:Q39224]	None
AT1G17030	0.413124	0.443042	0.709708	0.321975	12.6667	0.456928	15.6667	NA	Uncharacterized protein At1g17030/F20D23_27 [Source:UniProtKB/TrEMBL%3BAcc:Q8GWU4]	None
AT1G17040	-0.330306	0.0903708	0.290735	2.6512	103.667	2.15114	80.3333	SHA	AT1G17040	None
AT1G17050	-0.551261	9.72028e-11	9.42319e-09	43.617	1096.67	30.0419	739.667	SPS2	SPS2 [Source:UniProtKB/TrEMBL%3BAcc:A0A178W8X1]	None
AT1G17070	-0.0986457	0.422847	0.691898	6.20052	390.333	5.9398	356.667	STIPL1	Septin and tuftelin-interacting protein 1 homolog 1 [Source:UniProtKB/Swiss-Prot%3BAcc:Q9SHG6]	None
AT1G17100	-0.0783447	0.279893	0.562465	140.859	1724.33	133.675	1603.33	NA	HBP1 [Source:UniProtKB/TrEMBL%3BAcc:A0A178W6J0]	None
AT1G17120	0.146701	0.131233	0.364356	16.5165	465.667	18.2764	507.667	CAT8	Cationic amino acid transporter 8%2C vacuolar [Source:UniProtKB/Swiss-Prot%3BAcc:Q9SHH0]	None
AT1G17130	-0.137248	0.119252	0.344513	23.5775	610	21.9003	545.333	NA	Family of unknown function (DUF572) [Source:TAIR%3BAcc:AT1G17130]	None
AT1G17160	0.0789185	0.549878	0.785706	9.37566	244.667	9.9981	254	NA	Ribokinase [Source:UniProtKB/TrEMBL%3BAcc:A1A6H3]	None
AT1G17170	-0.00520524	0.957349	0.985908	41.8563	581.333	42.6138	567	GSTU24	Glutathione S-transferase U24 [Source:UniProtKB/Swiss-Prot%3BAcc:Q9SHH6]	None
AT1G17180	-0.153648	0.245745	0.523593	53.671	798.333	49.5171	689	GSTU25	Glutathione S-transferase U25 [Source:UniProtKB/Swiss-Prot%3BAcc:Q9SHH7]	None
AT1G17190	0.00905255	0.960237	0.986808	20.7779	306.667	21.6094	297.667	GSTU26	Glutathione S-transferase U26 [Source:UniProtKB/Swiss-Prot%3BAcc:Q9SHH8]	None
AT1G17200	-0.388685	7.78909e-06	0.000206157	94.6048	1081.67	72.1286	813	NA	CASP-like protein [Source:UniProtKB/TrEMBL%3BAcc:A0A178W560]	None
AT1G17220	-0.257126	0.000648137	0.00755387	103.618	7915.67	88.1552	6564.67	FUG1	Translation initiation factor IF-2%2C chloroplastic [Source:UniProtKB/Swiss-Prot%3BAcc:Q9SHI1]	None
AT1G17230	-0.0614086	0.658141	0.850595	5.57988	312.333	5.38059	298.333	NA	Non-specific serine/threonine protein kinase [Source:UniProtKB/TrEMBL%3BAcc:A0A178W313]	None
AT1G17235	1.73062	0.205883	NA	0.375443	1	1.44569	3	RTFL11	RTFL11 [Source:UniProtKB/TrEMBL%3BAcc:A0A178WGQ1]	None
AT1G17260	0.573539	0.209826	0.478985	0.293525	14	0.426134	21	AHA10	Plasma membrane ATPase [Source:UniProtKB/TrEMBL%3BAcc:A0A178W776]	None
AT1G17285	-0.353201	0.618747	0.828503	2.16883	11.6667	1.67423	9.33333	NA	unknown protein%3B FUNCTIONS IN: molecular_function unknown%3B INVOLVED IN: biological_process unknown%3B LOCATED IN: endomembrane system%3B BEST Arabidopsis thaliana protein match is: unknown protein (TAIR:AT1G17300.1)%3B Ha. [Source:TAIR%3BAcc:AT1G17285]	None
AT1G17290	0.172295	0.0200488	0.104603	66.0642	2214.67	75.2292	2427.67	ALAAT1	Alanine aminotransferase 1%2C mitochondrial [Source:UniProtKB/Swiss-Prot%3BAcc:F4I7I0]	None
AT1G17300	-0.402037	0.311391	0.592744	3.60826	29	2.74315	22	NA	unknown protein%3B BEST Arabidopsis thaliana protein match is: unknown protein (TAIR:AT1G17285.1)%3B Ha. [Source:TAIR%3BAcc:AT1G17300]	None
AT1G17330	0.0103213	0.951828	0.983702	7.07372	138	7.02127	137	NA	At1g17330 [Source:UniProtKB/TrEMBL%3BAcc:Q8GUM8]	None
AT1G17340	-0.0241765	0.81007	0.927757	9.8738	555.667	9.82569	537.333	SAC5	Phosphoinositide phosphatase SAC5 [Source:UniProtKB/Swiss-Prot%3BAcc:Q8RW97]	None
AT1G17345	0.0834657	0.883406	0.959186	1.59152	12.3333	1.64614	13.3333	SAUR77	Auxin-responsive protein SAUR77 [Source:UniProtKB/Swiss-Prot%3BAcc:Q9LQI6]	None
AT1G17350	-0.17623	0.266708	0.5474	10.8334	168.333	9.75454	146	NA	NADH:ubiquinone oxidoreductase intermediate-associated protein 30 [Source:UniProtKB/TrEMBL%3BAcc:F4I7I6]	None
AT1G17360	-0.464298	3.0867e-06	9.30638e-05	18.1008	1120.33	13.3603	811.333	NA	F28G4.18 protein [Source:UniProtKB/TrEMBL%3BAcc:Q9LQI8]	None
AT1G17420	0.00109047	0.994773	0.998395	3.33693	178.333	3.35217	176.333	LOX3	Lipoxygenase 3%2C chloroplastic [Source:UniProtKB/Swiss-Prot%3BAcc:Q9LNR3]	None
AT1G17430	0.135153	0.456976	0.719155	6.54092	122.667	7.28945	131.333	NA	Alpha/beta-Hydrolases superfamily protein [Source:UniProtKB/TrEMBL%3BAcc:Q9LNR2]	None
AT1G17455	-0.0597427	0.780842	0.914689	8.66272	82.3333	8.47231	77.3333	EFL4	ELF4-L4 [Source:UniProtKB/TrEMBL%3BAcc:A0A178WKX5]	None
AT1G17460	0.105434	0.631676	0.835945	1.87813	72	2.0326	76	TRFL3	TRF-like 3 [Source:UniProtKB/TrEMBL%3BAcc:F4I7K3]	None
AT1G17470	0.0336119	0.669051	0.856409	55.8186	1585.67	57.4778	1600.67	DRG1	Developmentally-regulated G-protein 1 [Source:UniProtKB/Swiss-Prot%3BAcc:Q9LQK0]	None
AT1G17490	0.137862	0.33942	0.621402	25.6392	188.667	29.1868	202.667	NA	At1g17490/F1L3_4 [Source:UniProtKB/TrEMBL%3BAcc:Q9LNQ6]	None
AT1G17500	0.339836	0.000334874	0.00448333	7.0697	567	8.86318	708	ALA4	Phospholipid-transporting ATPase [Source:UniProtKB/TrEMBL%3BAcc:A0A178W5K3]	None
AT1G17530	0.334934	0.00431031	0.0335179	28.424	419.333	36.1751	519.667	TIM23-1	Mitochondrial import inner membrane translocase subunit TIM23-1 [Source:UniProtKB/Swiss-Prot%3BAcc:Q9LNQ1]	None
AT1G17550	0.00657373	0.95009	0.983154	10.2328	445	10.3736	443.667	HAB2	Protein phosphatase 2C 7 [Source:UniProtKB/Swiss-Prot%3BAcc:Q9LNP9]	None
AT1G17580	-0.0561331	0.574838	0.80154	10.2548	976.333	9.96122	928.667	XI-1	Myosin-5 [Source:UniProtKB/Swiss-Prot%3BAcc:Q39160]	None
AT1G17610	-0.323526	0.429571	0.698007	1.43455	32.6667	1.16601	26.3333	CHS1	Disease resistance protein CHS1 [Source:UniProtKB/Swiss-Prot%3BAcc:F4I902]	None
AT1G17615	0	1	NA	0	0	0	0	NA	Disease resistance protein (TIR-NBS class) [Source:UniProtKB/TrEMBL%3BAcc:Q4PT31]	None
AT1G17620	0.275804	0.00696227	0.0472924	30.2397	445	37.1414	527	NA	At1g17620/F11A6_23 [Source:UniProtKB/TrEMBL%3BAcc:Q9LNP3]	None
AT1G17630	-0.970581	0.51269	0.761522	0.602405	21.3333	0.283955	11	PCMP-E72	Putative pentatricopeptide repeat-containing protein At1g17630 [Source:UniProtKB/Swiss-Prot%3BAcc:Q9LNP2]	None
AT1G17680	0.131199	0.231369	0.505495	7.63778	462	8.48867	499.333	NA	Tetratricopeptide repeat (TPR)-containing protein [Source:UniProtKB/TrEMBL%3BAcc:Q8GUP0]	None
AT1G17700	0.299016	0.292539	0.574204	8.35626	68	10.2557	80.6667	PRA1F1	PRA1 family protein F1 [Source:UniProtKB/Swiss-Prot%3BAcc:Q9FZ63]	None
AT1G17730	0.102193	0.350606	0.633025	28.714	334	32.4548	352	CHMP1A	ESCRT-related protein CHMP1A [Source:UniProtKB/Swiss-Prot%3BAcc:Q8LE58]	None
AT1G17745	-0.00525188	0.953024	0.983883	32.8017	1524.33	33.3798	1480.33	PGDH	D-3-phosphoglycerate dehydrogenase [Source:TAIR%3BAcc:AT1G17745]	None
AT1G17750	-0.171856	0.498342	0.750109	1.16302	65	1.04118	56.6667	PEPR2	Leucine-rich repeat receptor-like protein kinase PEPR2 [Source:UniProtKB/Swiss-Prot%3BAcc:Q9FZ59]	None
AT1G17780	0.276062	0.0635107	0.231643	10.3919	169.333	12.8513	201.667	NA	unknown protein%3B BEST Arabidopsis thaliana protein match is: unknown protein (TAIR:AT2G16575.1)%3B Ha. [Source:TAIR%3BAcc:AT1G17780]	None
AT1G17810	-1.07624	0.641224	NA	0.07729	1.66667	0.0381384	0.666667	TIP3-2	BETA-TIP [Source:UniProtKB/TrEMBL%3BAcc:A0A178WI57]	None
AT1G17840	-0.231841	0.00228047	0.0207414	57.7771	2742	49.769	2300	ABCG11	ABC transporter G family member 11 [Source:UniProtKB/Swiss-Prot%3BAcc:Q8RXN0]	None
AT1G17860	0.255305	0.0341943	0.153036	179.056	1491.33	214.803	1713.67	KTI2	Kunitz trypsin inhibitor 2 [Source:UniProtKB/Swiss-Prot%3BAcc:Q9LMU2]	None
AT1G17950	-0.340928	0.34358	0.625004	2.31922	36.6667	1.87074	28	MYB52	Transcription factor MYB52 [Source:UniProtKB/Swiss-Prot%3BAcc:Q6R0C4]	None
AT1G17970	0.2911	0.0158144	0.0879709	13.775	252.667	16.9364	304	NA	At1g17970/F2H15_16 [Source:UniProtKB/TrEMBL%3BAcc:Q944L9]	None
AT1G18020	-0.673805	0.859072	NA	0.0271383	0.666667	0.0165444	0.333333	NA	Putative 12-oxophytodienoate reductase-like protein 2B [Source:UniProtKB/Swiss-Prot%3BAcc:P0DI09]	None
AT1G18030	0.371574	0.0120085	0.0725269	6.81653	186.667	8.97347	236.667	NA	Probable protein phosphatase 2C 8 [Source:UniProtKB/Swiss-Prot%3BAcc:Q9LMT1]	None
AT1G18080	-0.213012	0.00452365	0.0346537	424.831	8833.67	368.813	7426.33	RACK1A	RACK1A_AT [Source:UniProtKB/TrEMBL%3BAcc:A0A178WHX3]	None
AT1G18090	0.277215	0.13144	0.364707	3.49759	111.667	4.31717	132.667	NA	5'-3' exonuclease family protein [Source:UniProtKB/TrEMBL%3BAcc:Q94A33]	None
AT1G18160	0.152295	0.0581963	0.217912	15.0918	1016	16.8849	1113.67	NA	Protein kinase superfamily protein [Source:UniProtKB/TrEMBL%3BAcc:F4IAN2]	None
AT1G18170	-0.166319	0.0689069	0.244852	49.4283	829.333	44.6112	731	FKBP17-2	Peptidyl-prolyl cis-trans isomerase FKBP17-2%2C chloroplastic [Source:UniProtKB/Swiss-Prot%3BAcc:Q9LDY5]	None
AT1G18180	-0.008847	0.968452	0.989994	4.47008	82.3333	4.52879	80.6667	NA	Protein of unknown function (DUF1295) [Source:TAIR%3BAcc:AT1G18180]	None
AT1G18280	-0.653531	0.591143	NA	0.246512	3	0.168404	1.66667	NA	At1g18280 [Source:UniProtKB/TrEMBL%3BAcc:Q9LE56]	None
AT1G18290	0.233213	0.510717	0.760208	2.64757	33	3.20597	36.6667	NA	DUF4228 domain protein [Source:UniProtKB/TrEMBL%3BAcc:Q9LE02]	None
AT1G18300	0.486031	0.0382001	0.164946	6.47758	102	9.22449	142.667	NUDT4	Nudix hydrolase 4 [Source:UniProtKB/Swiss-Prot%3BAcc:Q9LE73]	None
AT1G18320	-0.124547	0.916787	NA	0.236152	2.66667	0.221746	2.33333	NA	Mitochondrial import inner membrane translocase subunit Tim17/Tim22/Tim23 family protein [Source:TAIR%3BAcc:AT1G18320]	None
AT1G18390	0.378052	0.0100143	0.0628103	7.65213	289	10.0537	370.333	NA	Protein kinase superfamily protein [Source:TAIR%3BAcc:AT1G18390]	None
AT1G18400	0.156161	0.222708	0.495711	21.9965	324	25.098	350.667	BEE1	Transcription factor BEE 1 [Source:UniProtKB/Swiss-Prot%3BAcc:Q8GZ13]	None
AT1G18420	-0.0130466	0.915604	0.971367	10.3501	310.667	8.78337	299.333	ALMT3	Putative aluminum-activated malate transporter 3 [Source:UniProtKB/Swiss-Prot%3BAcc:Q9LPQ8]	None
AT1G18450	0.0427841	0.623824	0.831472	27.7306	791.333	28.7965	806.667	ARP4	Actin-related protein 4 [Source:UniProtKB/Swiss-Prot%3BAcc:Q84M92]	None
AT1G18460	-0.154926	0.0689824	0.244983	32.9796	1219	29.8146	1082.67	NA	Alpha/beta-Hydrolases superfamily protein [Source:UniProtKB/TrEMBL%3BAcc:Q8LPF5]	None
AT1G18480	-0.0451594	0.7235	0.883387	12.6803	320.333	12.407	308	SLP2	Shewanella-like protein phosphatase 2 [Source:UniProtKB/Swiss-Prot%3BAcc:Q944L7]	None
AT1G18485	0.292051	0.0134071	0.0781039	5.20661	301.333	6.45143	363.333	PCMP-H8	Pentatricopeptide repeat-containing protein At1g18485 [Source:UniProtKB/Swiss-Prot%3BAcc:Q0WN60]	None
AT1G18486	0.18602	0.208216	0.477278	8.28813	206	9.42531	232.333	NA	unknown protein%3B FUNCTIONS IN: molecular_function unknown%3B INVOLVED IN: biological_process unknown%3B LOCATED IN: endomembrane system%3B BEST Arabidopsis thaliana protein match is: unknown protein (TAIR:AT4G02655.1)%3B Ha. [Source:TAIR%3BAcc:AT1G18486]	None
AT1G18500	-0.0797061	0.231102	0.505291	53.2518	1961.67	51.2205	1816.67	IPMS1	2-isopropylmalate synthase 1%2C chloroplastic [Source:UniProtKB/Swiss-Prot%3BAcc:Q9LPR4]	None
AT1G18530	-0.674835	0.856565	NA	0.137209	0.666667	0.0896477	0.333333	CML15	Probable calcium-binding protein CML15 [Source:UniProtKB/Swiss-Prot%3BAcc:Q9FZ75]	None
AT1G18560	-0.111231	0.610068	0.822944	2.05721	85	1.88008	77.3333	NA	BED zinc finger and hAT dimerization domain-containing protein [Source:UniProtKB/TrEMBL%3BAcc:F4ICA1]	None
AT1G18570	0.559395	0.00187602	0.0178481	5.64846	143	8.52006	204.667	MYB51	Transcription factor MYB51 [Source:UniProtKB/Swiss-Prot%3BAcc:O49782]	None
AT1G18580	-0.0995366	0.413091	0.684214	9.98805	330.333	9.39438	305.333	GAUT11	Hexosyltransferase [Source:UniProtKB/TrEMBL%3BAcc:A0A178WM53]	None
AT1G18590	0.160904	0.181134	0.440345	19.4451	387.667	22.1294	425.667	SOT17	SOT17 [Source:UniProtKB/TrEMBL%3BAcc:A0A384KIF3]	None
AT1G18600	-0.10854	0.35903	0.640256	15.7113	336.667	14.6175	306	RBL12	RBL12 [Source:UniProtKB/TrEMBL%3BAcc:A0A178WDJ5]	None
AT1G18610	-0.080665	0.606145	0.820345	5.82765	221	5.50701	209.667	NA	F25I16.5 protein [Source:UniProtKB/TrEMBL%3BAcc:Q9FZ82]	None
AT1G18620	-0.304026	0.00193714	0.0182642	23.8507	1427	19.6345	1157	NA	unknown protein%3B BEST Arabidopsis thaliana protein match is: unknown protein (TAIR:AT1G74160.1)%3B Ha. [Source:TAIR%3BAcc:AT1G18620]	None
AT1G18630	-0.0682921	0.635697	0.838605	18.0384	235.667	17.3925	218.667	RBG6	GR-RBP6 [Source:UniProtKB/TrEMBL%3BAcc:A0A178WQQ6]	None
AT1G18660	-0.172892	0.0405564	0.171786	30.4814	1014.67	27.2358	890.333	NA	Zinc finger (C3HC4-type RING finger) family protein [Source:UniProtKB/TrEMBL%3BAcc:F4ICB5]	None
AT1G18690	0.178666	0.283958	0.566119	2.76771	138.333	3.14168	155	XXT4	Xyloglucan 6-xylosyltransferase 4 [Source:UniProtKB/Swiss-Prot%3BAcc:Q9M9U0]	None
AT1G18700	0.156905	0.119813	0.345363	12.4997	529.667	14.0849	580.667	NA	DNAJ heat shock N-terminal domain-containing protein [Source:TAIR%3BAcc:AT1G18700]	None
AT1G18710	1.19327	0.0424548	0.176854	0.559651	11.3333	1.30539	25.3333	AtMYB47	MYB transcription factor [Source:UniProtKB/TrEMBL%3BAcc:Q9M9U2]	None
AT1G18730	-0.280616	8.50426e-05	0.00152239	185.66	1695.33	154.626	1371.33	PNSB4	Photosynthetic NDH subunit of subcomplex B 4%2C chloroplastic [Source:UniProtKB/Swiss-Prot%3BAcc:Q8RXS1]	None
AT1G18740	0.257537	0.0339788	0.152722	17.8113	424.333	23.1794	501	NA	At1g18740/F6A14_15 [Source:UniProtKB/TrEMBL%3BAcc:Q9M9U5]	None
AT1G18750	-0.0401487	0.885377	0.960031	2.25368	56.6667	2.20402	55.3333	AGL65	AGAMOUS-like 65 [Source:TAIR%3BAcc:AT1G18750]	None
AT1G18773	0.307696	0.146236	0.38832	7.57942	83.3333	9.72593	99.3333	NA	FUNCTIONS IN: molecular_function unknown%3B INVOLVED IN: biological_process unknown%3B LOCATED IN: endomembrane system%3B BEST Arabidopsis thaliana protein match is: carboxylesterases (TAIR:AT4G22300.1)%3B Ha. [Source:TAIR%3BAcc:AT1G18773]	None
AT1G18830	0.69823	0.371655	NA	0.0935495	6	0.166161	9	SEC31A	Protein transport protein SEC31 homolog A [Source:UniProtKB/Swiss-Prot%3BAcc:F4ICD9]	None
AT1G18860	0.180017	0.45435	0.717427	2.91837	76.3333	3.27985	83.3333	WRKY61	WRKY DNA-binding protein 61 [Source:TAIR%3BAcc:AT1G18860]	None
AT1G18870	-0.481166	0.0130678	0.0768399	6.17062	190	4.41283	132.667	ICS2	Isochorismate synthase 2%2C chloroplastic [Source:UniProtKB/Swiss-Prot%3BAcc:Q9M9V6]	None
AT1G18880	0.332039	0.000300129	0.00410241	15.9184	557	20.2171	688.333	NPF2.9	Protein NRT1/ PTR FAMILY 2.9 [Source:UniProtKB/Swiss-Prot%3BAcc:Q9M9V7]	None
AT1G18900	-0.200446	0.0716759	0.251303	7.62274	465	6.69862	400.333	NA	Pentatricopeptide repeat (PPR) superfamily protein [Source:UniProtKB/TrEMBL%3BAcc:F4IDY2]	None
AT1G18940	0.510261	0.199301	0.46428	1.01791	28	1.50382	37.6667	NA	F14D16.8 [Source:UniProtKB/TrEMBL%3BAcc:Q9LMD4]	None
AT1G18950	-0.0360002	0.681133	0.862836	11.4396	679	11.4498	651.333	NA	DDT domain superfamily [Source:TAIR%3BAcc:AT1G18950]	None
AT1G18960	1.14313	0.463231	NA	0.0579227	1	0.148275	2	NA	F14D16.11 [Source:UniProtKB/TrEMBL%3BAcc:Q9LMD1]	None
AT1G19010	-0.362689	0.0899309	0.290024	5.01539	108.667	3.92584	84	NA	Uncharacterized protein At1g19010 [Source:UniProtKB/TrEMBL%3BAcc:Q9C5J5]	None
AT1G19020	0.246678	0.14639	0.388511	24.4546	185.333	29.8487	213.333	NA	CDP-diacylglycerol-glycerol-3-phosphate 3-phosphatidyltransferase [Source:UniProtKB/TrEMBL%3BAcc:Q8VYY6]	None
AT1G19025	-0.0158207	0.956372	0.985514	1.69998	46.6667	1.71583	44.6667	NA	DNA repair metallo-beta-lactamase family protein [Source:UniProtKB/TrEMBL%3BAcc:F4IDZ7]	None
AT1G19070	-0.151222	0.746869	0.896009	1.41214	21.6667	1.33032	18.6667	NA	F-box protein At1g19070 [Source:UniProtKB/Swiss-Prot%3BAcc:Q3E7S2]	None
AT1G19100	-0.013962	0.913549	0.970974	6.86461	292.667	6.81852	285.333	MORC6	Protein MICRORCHIDIA 6 [Source:UniProtKB/Swiss-Prot%3BAcc:Q56Y74]	None
AT1G19110	-0.0530693	0.489555	0.743472	23.7872	1184.33	23.2253	1129.33	NA	Inter-alpha-trypsin inhibitor heavy chain-like protein [Source:UniProtKB/TrEMBL%3BAcc:Q8L798]	None
AT1G19115	-1.44858	0.53161	NA	0.065949	1	0.0258918	0.333333	NA	unknown protein%3B FUNCTIONS IN: molecular_function unknown%3B INVOLVED IN: biological_process unknown%3B LOCATED IN: cellular_component unknown%3B BEST Arabidopsis thaliana protein match is: unknown protein (TAIR:AT1G72490.1)%3B Ha. [Source:TAIR%3BAcc:AT1G19115]	None
AT1G19120	-0.0433555	0.746625	0.895969	22.3849	246.667	22.4589	233.667	LSM1A	LSM1A [Source:UniProtKB/TrEMBL%3BAcc:A0A178W3J1]	None
AT1G19150	-0.445246	4.53796e-09	2.99949e-07	130.529	2023.67	95.6814	1478.67	LHCA6	Photosystem I chlorophyll a/b-binding protein 6%2C chloroplastic [Source:UniProtKB/Swiss-Prot%3BAcc:Q8LCQ4]	None
AT1G19170	-0.227188	0.0549149	0.210441	10.2945	324.333	8.8575	272.333	NA	Pectin lyase-like superfamily protein [Source:UniProtKB/TrEMBL%3BAcc:F4IE17]	None
AT1G19180	0.294002	0.0587827	0.219098	15.3461	277.667	19.0939	333.667	TIFY10A	TIFY10A [Source:UniProtKB/TrEMBL%3BAcc:A0A178W7G1]	None
AT1G19190	0.0240237	0.946601	0.982207	1.51166	32.3333	1.57412	32	CXE1	Probable carboxylesterase 1 [Source:UniProtKB/Swiss-Prot%3BAcc:Q9LMA7]	None
AT1G19230	0.375452	0.044836	0.1833	2.50384	155.667	3.41124	193.667	RBOHE	Respiratory burst oxidase homolog protein E [Source:UniProtKB/Swiss-Prot%3BAcc:O81211]	None
AT1G19270	0.176469	0.192922	0.455656	4.89139	210	5.55687	235	DA1	DA1 [Source:UniProtKB/TrEMBL%3BAcc:A0A178WC71]	None
AT1G19290	-0.00461044	0.997862	NA	0.00012084	1	1.84567e-05	1	NA	Putative pentatricopeptide repeat-containing protein At1g19290 [Source:UniProtKB/Swiss-Prot%3BAcc:Q9LN69]	None
AT1G19320	-0.328991	0.553927	0.788068	0.995054	13.6667	0.781632	10.6667	NA	At1g19320 [Source:UniProtKB/TrEMBL%3BAcc:Q9LN66]	None
AT1G19340	0.0106209	0.965477	0.989072	2.93123	71.3333	2.88822	73.3333	NA	Methyltransferase-like protein 2 [Source:UniProtKB/Swiss-Prot%3BAcc:Q8LFA9]	None
AT1G19350	-0.197828	0.00206642	0.0192352	134.332	2872	118.372	2469	BES1	Brassinosteroid signaling positive regulator (BZR1) family protein [Source:UniProtKB/TrEMBL%3BAcc:F4HP45]	None
AT1G19380	0.592976	0.00299337	0.0255702	16.0053	127.333	24.5801	185.333	NA	At1g19380 [Source:UniProtKB/TrEMBL%3BAcc:Q9LN60]	None
AT1G19394	0.180269	0.652702	0.848595	3.87066	23.3333	4.50108	25.3333	NA	unknown protein%3B Ha. [Source:TAIR%3BAcc:AT1G19394]	None
AT1G19440	0.0110938	0.922105	0.972995	15.4715	477.333	15.8497	470.667	KCS4	3-ketoacyl-CoA synthase 4 [Source:UniProtKB/Swiss-Prot%3BAcc:Q9LN49]	None
AT1G19470	-0.964897	0.801385	NA	0.0137087	0.333333	0	0	NA	Kelch repeat-containing protein At1g19470 [Source:UniProtKB/Swiss-Prot%3BAcc:P0C2F7]	None
AT1G19480	0.054243	0.80139	0.923665	4.08754	101.333	4.31338	101	NA	At1g19480 [Source:UniProtKB/TrEMBL%3BAcc:Q0V7V4]	None
AT1G19485	0.149136	0.34825	0.63006	3.51775	177.333	3.86295	197.333	NA	Transducin/WD40 repeat-like superfamily protein [Source:UniProtKB/TrEMBL%3BAcc:F4HP69]	None
AT1G19520	-0.2721	0.00313492	0.0263976	16.7324	821	14.1912	661	NFD5	pentatricopeptide (PPR) repeat-containing protein [Source:TAIR%3BAcc:AT1G19520]	None
AT1G19530	0.850746	0.00411787	0.03253	5.7115	67.3333	10.7423	113.667	NA	DNA polymerase epsilon catalytic subunit A [Source:UniProtKB/TrEMBL%3BAcc:Q93WK6]	None
AT1G19540	0.720571	0.234064	0.509111	0.570247	7.66667	0.924545	12.6667	NA	At1g19540 [Source:UniProtKB/TrEMBL%3BAcc:Q29PX7]	None
AT1G19580	0.115728	0.268465	0.54966	17.6502	421	19.328	446	GAMMACA1	GAMMA CA1 [Source:UniProtKB/TrEMBL%3BAcc:A0A178WHZ1]	None
AT1G19600	-0.0473275	0.55976	0.791586	52.905	1309.67	51.5085	1251.67	NA	At1g19600 [Source:UniProtKB/TrEMBL%3BAcc:Q9LN35]	None
AT1G19620	-0.374915	0.267912	0.549068	2.08785	35.6667	1.63127	27.3333	NA	unknown protein%3B Ha. [Source:TAIR%3BAcc:AT1G19620]	None
AT1G19680	0.158931	0.100514	0.31129	17.8624	521	19.8901	576.333	NA	At1g19680 [Source:UniProtKB/TrEMBL%3BAcc:Q9FXG6]	None
AT1G19710	0.0632032	0.650859	0.847431	8.02564	242.667	8.58146	248.667	NA	At1g19710 [Source:UniProtKB/TrEMBL%3BAcc:Q67Z55]	None
AT1G19740	-0.0221157	0.748702	0.896981	103.547	1474.67	103.569	1430.33	NA	ATP-dependent protease La (LON) domain protein [Source:UniProtKB/TrEMBL%3BAcc:Q9FXH3]	None
AT1G19750	-0.7884	0.162329	0.412788	0.53524	14.3333	0.32548	8.33333	NA	Transducin/WD40 repeat-like superfamily protein [Source:UniProtKB/TrEMBL%3BAcc:F4HQX6]	None
AT1G19770	0.0754889	0.343867	0.625405	88.2335	1324	93.357	1370.33	PUP14	PUP14 [Source:UniProtKB/TrEMBL%3BAcc:A0A178WHV5]	None
AT1G19800	-0.130023	0.160272	0.409653	33.7985	613.667	31.0631	552	TGD1	Protein TRIGALACTOSYLDIACYLGLYCEROL 1%2C chloroplastic [Source:UniProtKB/Swiss-Prot%3BAcc:Q8L4R0]	None
AT1G19830	0.70052	0.445314	NA	0.317085	2.66667	0.511215	4.33333	NA	At1g19830 [Source:UniProtKB/TrEMBL%3BAcc:Q9FXI0]	None
AT1G19850	0.0308201	0.805553	0.926007	5.13985	308.667	5.2214	309.667	ARF5	Auxin response factor [Source:UniProtKB/TrEMBL%3BAcc:A0A178W993]	None
AT1G19890	-0.00310747	0.999392	NA	0.029641	0.333333	0.038958	0.333333	MGH3	MGH3 [Source:UniProtKB/TrEMBL%3BAcc:A0A178WKL2]	None
AT1G19910	0.121409	0.108638	0.32526	344.729	3653.67	376.123	3862	VHA-C2	V-type proton ATPase proteolipid subunit [Source:UniProtKB/TrEMBL%3BAcc:Q24JM2]	None
AT1G19950	-0.0787557	0.623751	0.831472	8.43183	182.333	8.12851	166.667	HVA22H	HVA22-like protein h [Source:UniProtKB/Swiss-Prot%3BAcc:Q8LEM6]	None
AT1G19960	0.74984	0.000289929	0.00398026	18.7419	113.333	32.4593	181	NA	Putative uncharacterized protein At1g19960 [Source:UniProtKB/TrEMBL%3BAcc:Q9LNS5]	None
AT1G19980	0.0104607	0.963235	0.988408	3.59253	82.6667	3.69764	81.3333	NA	Cytomatrix protein-like protein [Source:UniProtKB/TrEMBL%3BAcc:Q84JE5]	None
AT1G19990	-0.127567	0.537113	0.776746	8.02242	113	7.529	102	NA	unknown protein%3B FUNCTIONS IN: molecular_function unknown%3B INVOLVED IN: biological_process unknown%3B LOCATED IN: cellular_component unknown%3B EXPRESSED IN: cultured cell%3B BEST Arabidopsis thaliana protein match is: unknown protein (TAIR:AT5G11600.1). [Source:TAIR%3BAcc:AT1G19990]	None
AT1G20020	0.142831	0.00940399	0.0599774	493.968	11011	553.127	11923.3	LFNR2	Ferredoxin--NADP reductase%2C leaf isozyme 2%2C chloroplastic [Source:UniProtKB/Swiss-Prot%3BAcc:Q8W493]	None
AT1G20030	0.085763	0.722835	0.882832	2.63731	64	2.79224	66.3333	NA	Pathogenesis-related thaumatin superfamily protein [Source:UniProtKB/TrEMBL%3BAcc:Q9LNT0]	None
AT1G20050	0.0620871	0.511559	0.760798	62.1587	752.667	65.769	769	HYD1	Probable 3-beta-hydroxysteroid-Delta(8)%2CDelta(7)-isomerase [Source:UniProtKB/Swiss-Prot%3BAcc:O48962]	None
AT1G20065	0.334293	0.825146	NA	0.152345	1	0.173953	1.33333	NA	DNA-directed RNA polymerase I subunit RPA12-like protein [Source:UniProtKB/TrEMBL%3BAcc:Q1G3U4]	None
AT1G20080	-0.0700122	0.945218	NA	0.117571	3.66667	0.115996	3.33333	SYT2	Synaptotagmin-2 [Source:UniProtKB/Swiss-Prot%3BAcc:B6ETT4]	None
AT1G20090	-0.0107637	0.895536	0.964014	47.6143	905.667	48.0033	884.333	ARAC4	ROP2 [Source:UniProtKB/TrEMBL%3BAcc:A0A384L636]	None
AT1G20110	0.0547033	0.436757	0.704716	51.0514	1742	53.1448	1772.67	FREE1	Protein FREE1 [Source:UniProtKB/Swiss-Prot%3BAcc:Q9ASS2]	None
AT1G20120	-0.892703	0.109469	0.327035	0.628906	15	0.349661	8	NA	GDSL esterase/lipase At1g20120 [Source:UniProtKB/Swiss-Prot%3BAcc:P0DKJ6]	None
AT1G20130	-1.26046	0.460648	NA	0.0586021	1.66667	0.0254491	0.666667	APG	Anther-specific proline-rich protein APG [Source:UniProtKB/Swiss-Prot%3BAcc:P40602]	None
AT1G20140	0.0433912	0.785613	0.916763	13.6527	154.667	14.2977	156.333	ASK4	SK4 [Source:UniProtKB/TrEMBL%3BAcc:A0A178W187]	None
AT1G20180	0.807659	0.551505	NA	0.0723813	1.66667	0.114891	3	NA	UPF0496 protein At1g20180 [Source:UniProtKB/Swiss-Prot%3BAcc:Q6DYE5]	None
AT1G20230	-0.148621	0.52656	0.771808	1.60139	72.3333	1.46256	64.6667	PCMP-H21	Pentatricopeptide repeat-containing protein At1g20230 [Source:UniProtKB/Swiss-Prot%3BAcc:Q9LNU6]	None
AT1G20260	0.0258886	0.681652	0.863097	108.247	3795.33	111.536	3785.67	VHA-B3	VAB3 [Source:UniProtKB/TrEMBL%3BAcc:A0A178WCF6]	None
AT1G20300	-0.389927	0.0225829	0.11396	7.01605	222.333	5.43872	168.333	NA	Pentatricopeptide repeat-containing protein At1g20300%2C mitochondrial [Source:UniProtKB/Swiss-Prot%3BAcc:Q9LN22]	None
AT1G20310	0.352579	0.831957	NA	0.116834	1.66667	0.157596	2	NA	Syringolide-induced protein [Source:UniProtKB/TrEMBL%3BAcc:Q8L956]	None
AT1G20350	-0.9667	0.120631	0.346703	0.887033	12.6667	0.461237	6.33333	TIM17-1	Mitochondrial import inner membrane translocase subunit TIM17-1 [Source:UniProtKB/Swiss-Prot%3BAcc:Q9LN27]	None
AT1G20380	0.469572	0.00294354	0.0252128	3.62649	140	5.03688	192.333	NA	Prolyl oligopeptidase family protein [Source:UniProtKB/TrEMBL%3BAcc:F4HSS5]	None
AT1G20460	0.344193	0.27437	0.555737	11.5439	42	14.6921	53.6667	NA	NADH-ubiquinone oxidoreductase chain [Source:UniProtKB/TrEMBL%3BAcc:Q8L6Z1]	None
AT1G20470	-0.118054	0.694013	0.868447	7.3189	56.3333	6.78415	51.6667	NA	F5M15.19 [Source:UniProtKB/TrEMBL%3BAcc:Q9LMV6]	None
AT1G20540	0.162644	0.167036	0.419513	18.2178	364	20.5569	400	NA	Transducin/WD40 repeat-like superfamily protein [Source:UniProtKB/TrEMBL%3BAcc:Q8RWD8]	None
AT1G20580	-0.132562	0.144387	0.385795	63.0411	828	58.8074	743.333	SMD3B	Small nuclear ribonucleoprotein SmD3b [Source:UniProtKB/Swiss-Prot%3BAcc:Q9LM92]	None
AT1G20600	0.958681	0.814255	NA	0	0	0.0226549	0.333333	NA	B3 domain-containing protein At1g20600 [Source:UniProtKB/Swiss-Prot%3BAcc:Q9LM90]	None
AT1G20620	0.545924	3.81272e-13	5.46028e-11	1098.74	35558	1603.12	50350	CAT3	catalase 3 [Source:TAIR%3BAcc:AT1G20620]	None
AT1G20630	0.565141	3.24599e-09	2.22327e-07	24.2888	819.333	36.1789	1172.33	CAT1	CAT1 [Source:UniProtKB/TrEMBL%3BAcc:A0A384KXY6]	None
AT1G20640	-0.0384274	0.761605	0.9043	7.18379	357.667	7.01986	348	NLP4	Protein NLP4 [Source:UniProtKB/Swiss-Prot%3BAcc:Q9LE38]	None
AT1G20690	-0.655602	0.261429	0.541477	0.443801	12	0.277753	7.66667	NA	SWI-SNF-related chromatin binding protein [Source:UniProtKB/TrEMBL%3BAcc:F4HUM5]	None
AT1G20693	0.245503	0.00193544	0.0182642	116.432	1724.33	141.107	1991.67	HMGB2	High mobility group B protein 2 [Source:UniProtKB/Swiss-Prot%3BAcc:O49596]	None
AT1G20696	-0.112561	0.16604	0.41812	149.072	2072	141.926	1867	HMGB3	high mobility group B3 [Source:TAIR%3BAcc:AT1G20696]	None
AT1G20700	0.489287	0.294929	0.577395	1.09039	15	1.54191	21	WOX14	WUSCHEL-related homeobox 14 [Source:UniProtKB/Swiss-Prot%3BAcc:Q9LM84]	None
AT1G20735	3.65034	0.11184	NA	0	0	0.140561	2.33333	NA	F-box and associated interaction domains-containing protein [Source:UniProtKB/TrEMBL%3BAcc:F4HUN6]	None
AT1G20760	0.215643	0.00983068	0.0619051	17.4267	1179	20.3423	1345.67	NA	Calcium-binding EF hand family protein [Source:UniProtKB/TrEMBL%3BAcc:Q9LM78]	None
AT1G20780	-0.0338104	0.719093	0.881165	13.0081	704.333	12.8599	676.333	PUB44	RING-type E3 ubiquitin transferase [Source:UniProtKB/TrEMBL%3BAcc:A0A178W875]	None
AT1G20810	-0.402565	0.00119349	0.0124238	28.0694	349	21.4612	257.667	FKBP18	Peptidyl-prolyl cis-trans isomerase FKBP18%2C chloroplastic [Source:UniProtKB/Swiss-Prot%3BAcc:Q9LM71]	None
AT1G20816	-0.246264	0.15979	0.409251	13.5441	142.667	11.6125	117.667	OEP21A	Outer envelope pore protein 21A%2C chloroplastic [Source:UniProtKB/Swiss-Prot%3BAcc:Q6ID99]	None
AT1G20823	0.143043	0.392005	0.667043	16.3266	168	17.9153	183.333	ATL80	RING-H2 finger protein ATL80 [Source:UniProtKB/Swiss-Prot%3BAcc:Q9LM69]	None
AT1G20830	-0.168372	0.17484	0.430586	19.299	356	17.3317	315	MCD1	Protein MULTIPLE CHLOROPLAST DIVISION SITE 1 [Source:UniProtKB/Swiss-Prot%3BAcc:Q8GWA7]	None
AT1G20850	-0.0396134	0.668291	0.855978	46.823	1101.33	46.5842	1037.67	XCP2	Cysteine protease XCP2 [Source:UniProtKB/Swiss-Prot%3BAcc:Q9LM66]	None
AT1G20900	0.276329	0.0505383	0.199368	9.02545	251	11.0778	297.333	AHL27	AT-hook motif nuclear-localized protein 27 [Source:UniProtKB/Swiss-Prot%3BAcc:Q9S7C9]	None
AT1G20920	-0.073315	0.341661	0.623072	14.193	1598	13.7352	1500.33	RH42	DEAD-box ATP-dependent RNA helicase 42 [Source:UniProtKB/Swiss-Prot%3BAcc:Q8H0U8]	None
AT1G20970	0.0842903	0.38397	0.661759	14.2226	1437.33	15.5208	1482.67	NA	FUNCTIONS IN: molecular_function unknown%3B INVOLVED IN: biological_process unknown%3B LOCATED IN: plasma membrane%2C vacuole%3B EXPRESSED IN: guard cell%2C cultured cell%3B BEST Arabidopsis thaliana protein match is: proton pump interactor 1 (TAIR:AT4G27500.1). [Source:TAIR%3BAcc:AT1G20970]	None
AT1G20980	0.000426664	0.995878	0.998601	22.1367	1630.67	22.4912	1597.33	SPL14	Squamosa promoter-binding-like protein 14 [Source:UniProtKB/Swiss-Prot%3BAcc:Q8RY95]	None
AT1G21000	-0.03093	0.769491	0.908815	31.8791	548.667	31.5441	524.667	NA	At1g21000/F9H16_1 [Source:UniProtKB/TrEMBL%3BAcc:Q93V70]	None
AT1G21010	0.206722	0.395675	0.669757	5.64571	58.6667	6.5652	66	NA	At1g21010 [Source:UniProtKB/TrEMBL%3BAcc:Q7XJ58]	None
AT1G21050	0.0752236	0.510913	0.760317	29.5151	337.333	31.2043	351.333	NA	Protein of unknown function%2C DUF617 [Source:TAIR%3BAcc:AT1G21050]	None
AT1G21060	-0.0984119	0.456692	0.718926	13.051	257.333	12.3682	239.333	NA	Protein of unknown function%2C DUF547 [Source:TAIR%3BAcc:AT1G21060]	None
AT1G21065	-0.362714	9.62896e-08	4.48339e-06	174.888	1899	136.796	1461	NA	Secondary thiamine-phosphate synthase enzyme [Source:UniProtKB/TrEMBL%3BAcc:Q9LPU1]	None
AT1G21090	-0.0242689	0.896504	0.964042	9.01037	121.667	8.75573	118.667	NA	At1g21090 [Source:UniProtKB/TrEMBL%3BAcc:Q0V805]	None
AT1G21140	0.21577	0.303257	0.584525	5.73396	89.6667	6.77516	101.333	NA	Vacuolar iron transporter homolog 1 [Source:UniProtKB/Swiss-Prot%3BAcc:Q9LPU9]	None
AT1G21170	0.189149	0.0772476	0.264396	7.95536	576	9.2411	646.667	SEC5B	Exocyst complex component SEC5 [Source:TAIR%3BAcc:AT1G21170]	None
AT1G21200	-0.108255	0.499017	0.75053	6.32473	195.667	5.93808	178.333	NA	F16F4.11 protein [Source:UniProtKB/TrEMBL%3BAcc:Q9LMN5]	None
AT1G21210	1.34135	0.166024	NA	0.0458793	2.33333	0.122578	5.66667	WAK4	Wall-associated receptor kinase 4 [Source:UniProtKB/Swiss-Prot%3BAcc:Q9LMN6]	None
AT1G21240	2.24504	0.056418	NA	0.0299343	1.33333	0.15357	6.33333	WAK3	Wall-associated receptor kinase 3 [Source:UniProtKB/Swiss-Prot%3BAcc:Q9LMN8]	None
AT1G21250	0.929448	0.0203937	0.105831	3.09815	180.667	6.08934	316	WAK1	Wall-associated receptor kinase 1 [Source:UniProtKB/Swiss-Prot%3BAcc:Q39191]	None
AT1G21270	0.33571	0.00323336	0.027016	15.8897	750.667	20.4145	917	WAK2	Wall-associated receptor kinase 2 [Source:UniProtKB/Swiss-Prot%3BAcc:Q9LMP1]	None
AT1G21340	-1.10312	0.430559	NA	0.271725	3	0.130078	1.33333	DOF1.2	Dof zinc finger protein DOF1.2 [Source:UniProtKB/Swiss-Prot%3BAcc:P68349]	None
AT1G21360	0.0285342	0.908333	0.968478	3.73339	58	3.86231	57.6667	GLTP2	Glycolipid transfer protein 2 [Source:UniProtKB/Swiss-Prot%3BAcc:Q6NLQ3]	None
AT1G21370	0.241176	0.105022	0.31941	8.12048	188	9.75231	215.667	NA	unknown protein%3B CONTAINS InterPro DOMAIN/s: Protein of unknown function DUF218 (InterPro:IPR003848)%3B Ha. [Source:TAIR%3BAcc:AT1G21370]	None
AT1G21395	0	1	NA	0	0	0	0	NA	unknown protein%3B BEST Arabidopsis thaliana protein match is: unknown protein (TAIR:AT2G26865.1)%3B Ha. [Source:TAIR%3BAcc:AT1G21395]	None
AT1G21400	0.138289	0.386077	0.66255	7.89278	266	8.88422	284.333	NA	Thiamin diphosphate-binding fold (THDP-binding) superfamily protein [Source:TAIR%3BAcc:AT1G21400]	None
AT1G21410	0.0149156	0.921196	0.972832	8.83301	210	9.03429	209	SKP2A	F-box protein SKP2A [Source:UniProtKB/Swiss-Prot%3BAcc:Q9LPL4]	None
AT1G21450	0.0332399	0.729682	0.886897	14.9548	538.667	15.5414	540.667	SCL1	Scarecrow-like protein 1 [Source:UniProtKB/Swiss-Prot%3BAcc:Q9SDQ3]	None
AT1G21560	-0.0141749	0.914372	0.971248	9.78291	273	9.85487	265.667	NA	F14J8.16 protein [Source:UniProtKB/TrEMBL%3BAcc:Q9LPK4]	None
AT1G21610	0.191011	0.0669949	0.24018	8.82789	446.667	10.2567	500	NA	Wound-responsive family protein [Source:UniProtKB/TrEMBL%3BAcc:F4HY28]	None
AT1G21630	0.148435	0.0480937	0.192835	26.6536	2167.67	29.6403	2363	NA	Calcium-binding EF hand family protein [Source:UniProtKB/TrEMBL%3BAcc:F4HY32]	None
AT1G21640	0.122315	0.212461	0.482445	19.6781	1183	21.6779	1260	NADK2	NAD kinase 2 [Source:UniProtKB/TrEMBL%3BAcc:F4HY34]	None
AT1G21660	-0.0588737	0.464761	0.725025	24.7674	834.333	24.061	789.333	NA	At1g21660 [Source:UniProtKB/TrEMBL%3BAcc:Q9XI12]	None
AT1G21670	0.100011	0.296599	0.578697	22.0914	881	23.8183	919	NA	DPP6 amino-terminal domain protein [Source:UniProtKB/TrEMBL%3BAcc:Q9XI11]	None
AT1G21680	0.661954	1.30821e-20	5.62053e-18	65.5075	2927	104.479	4539.67	NA	DPP6 N-terminal domain-like protein [Source:UniProtKB/TrEMBL%3BAcc:Q9XI10]	None
AT1G21690	-0.100094	0.403258	0.676452	19.5103	348.667	20.1161	321.333	EMB1968	ATPase family associated with various cellular activities (AAA) [Source:UniProtKB/TrEMBL%3BAcc:F4HY43]	None
AT1G21695	0.382468	0.400816	0.674481	1.38071	15	1.79116	19.3333	NA	At1g21695 [Source:UniProtKB/TrEMBL%3BAcc:Q9XI08]	None
AT1G21710	0.0826418	0.559855	0.791586	11.6376	244.333	12.367	255.667	OGG1	OGG1 [Source:UniProtKB/TrEMBL%3BAcc:A0A178WC14]	None
AT1G21720	-0.0385497	0.64397	0.842676	72.0028	825.333	71.1642	787.333	PBC1	Proteasome subunit beta type [Source:UniProtKB/TrEMBL%3BAcc:A0A178WJZ7]	None
AT1G21730	0.323759	0.0259923	0.125507	4.48739	263	5.77016	329	KIN7C	Kinesin-like protein KIN-7C%2C mitochondrial [Source:UniProtKB/Swiss-Prot%3BAcc:Q8W5R6]	None
AT1G21740	-0.168145	0.516594	0.764657	1.00098	60.6667	0.913923	52.6667	NA	DUF630 family protein%2C putative (DUF630 and DUF632) [Source:UniProtKB/TrEMBL%3BAcc:Q9XI02]	None
AT1G21750	0.141776	0.0584097	0.218346	67.609	2245.33	75.923	2411.33	PDIL1-1	Protein disulfide isomerase-like 1-1 [Source:UniProtKB/Swiss-Prot%3BAcc:Q9XI01]	None
AT1G21760	0.177489	0.0386176	0.16611	36.0623	1117.67	40.0747	1226.33	SKIP32	F-box protein 7 [Source:UniProtKB/Swiss-Prot%3BAcc:Q9XI00]	None
AT1G21790	0.487871	0.00219015	0.0201179	7.89691	148.667	11.0533	208.333	NA	F8K7.23 [Source:UniProtKB/TrEMBL%3BAcc:Q9XHZ7]	None
AT1G21840	-0.124737	0.673786	0.858943	4.14671	56.3333	3.75944	51.6667	UREF	Urease accessory protein F [Source:UniProtKB/Swiss-Prot%3BAcc:Q9XHZ3]	None
AT1G21880	-0.373909	0.00024209	0.00346178	28.966	609.333	22.4112	460.667	LYM1	LYP2 [Source:UniProtKB/TrEMBL%3BAcc:A0A178W9K9]	None
AT1G21910	-0.215503	0.227547	0.501619	23.3781	316.333	20.5121	265	ERF012	DREB26 [Source:UniProtKB/TrEMBL%3BAcc:A0A178W3Q9]	None
AT1G21930	0.21174	0.123632	0.351291	37.0021	231.667	43.9589	260	NA	At1g21930 [Source:UniProtKB/TrEMBL%3BAcc:Q84VW7]	None
AT1G21980	0.0705919	0.468765	0.728131	12.1215	680	12.9573	704	PIP5K1	Phosphatidylinositol 4-phosphate 5-kinase 1 [Source:UniProtKB/Swiss-Prot%3BAcc:Q56YP2]	None
AT1G22020	-0.067289	0.480905	0.73731	15.7475	654.667	15.1381	612	SHM6	Serine hydroxymethyltransferase 6 [Source:UniProtKB/Swiss-Prot%3BAcc:Q9LM59]	None
AT1G22040	-0.0285914	0.823567	0.932801	9.14396	284.667	9.03651	276.333	NA	F-box/kelch-repeat protein At1g22040 [Source:UniProtKB/Swiss-Prot%3BAcc:Q9LM55]	None
AT1G22050	-0.141276	0.404078	0.67749	13.9144	163.667	12.7169	145.333	MUB6	Membrane-anchored ubiquitin-fold protein 6 [Source:UniProtKB/Swiss-Prot%3BAcc:Q8GWJ6]	None
AT1G22065	0.214001	0.19057	0.452214	17.2181	129	20.179	146.333	NA	Putative uncharacterized protein [Source:UniProtKB/TrEMBL%3BAcc:Q1G3T6]	None
AT1G22070	0.110944	0.265249	0.545503	18.5303	523	20.3255	552	TGA3	At1g22070 [Source:UniProtKB/TrEMBL%3BAcc:Q147Q9]	None
AT1G22150	0.416192	0.277352	0.559558	0.796368	22.3333	1.06471	29.3333	SULTR1%3B3	Sulfate transporter 1.3 [Source:UniProtKB/Swiss-Prot%3BAcc:Q9FEP7]	None
AT1G22160	-0.201757	0.30936	0.590483	11.9002	106	10.5106	91.6667	FLZ5	FCS-Like Zinc finger 5 [Source:UniProtKB/Swiss-Prot%3BAcc:Q8VY80]	None
AT1G22170	-0.0291051	0.881361	0.958393	5.03901	103.667	5.03389	99.6667	NA	At1g22170 [Source:UniProtKB/TrEMBL%3BAcc:Q9LM13]	None
AT1G22190	0.979694	6.80168e-18	2.04094e-15	20.6818	442.333	41.1784	856.667	RAP2-13	Ethylene-responsive transcription factor RAP2-13 [Source:UniProtKB/Swiss-Prot%3BAcc:Q9LM15]	None
AT1G22210	0.938963	0.790722	NA	0.0162296	0.333333	0.0361003	0.666667	TPPC	Probable trehalose-phosphate phosphatase C [Source:UniProtKB/Swiss-Prot%3BAcc:F4I1A6]	None
AT1G22220	1.00215	0.019533	0.102684	0.675203	14	1.39424	27	NA	AUF2 [Source:UniProtKB/TrEMBL%3BAcc:A0A178W7K5]	None
AT1G22230	0.0902586	0.698419	0.870948	4.1182	103	4.50922	106	NA	Nucleolar GTP-binding protein [Source:UniProtKB/TrEMBL%3BAcc:Q5XVK1]	None
AT1G22240	0	1	NA	0	0	0	0	APUM8	Putative pumilio homolog 8%2C chloroplastic [Source:UniProtKB/Swiss-Prot%3BAcc:Q9LM20]	None
AT1G22250	0.220905	0.522671	0.768771	2.55255	27.3333	3.00699	31.3333	NA	F16L1.2 protein [Source:UniProtKB/TrEMBL%3BAcc:Q9LM21]	None
AT1G22270	-0.133927	0.336746	0.619037	37.3765	357	34.5212	317.333	TRM112A	Multifunctional methyltransferase subunit TRM112 homolog A [Source:UniProtKB/Swiss-Prot%3BAcc:Q8LFJ5]	None
AT1G22275	0.11473	0.793723	0.920212	0.340785	19.3333	0.371359	20.6667	ZYP1B	Synaptonemal complex protein 2 [Source:UniProtKB/Swiss-Prot%3BAcc:P61430]	None
AT1G22280	0.0888189	0.360162	0.641257	21.02	502.333	22.734	525	PAPP2C	Phytochrome-associated protein phosphatase type 2C [Source:UniProtKB/TrEMBL%3BAcc:F4I1B4]	None
AT1G22330	-0.0494286	0.690698	0.866486	13.9133	276	13.521	260.667	NA	RNA-binding (RRM/RBD/RNP motifs) family protein [Source:UniProtKB/TrEMBL%3BAcc:Q9LME7]	None
AT1G22410	-0.112339	0.104366	0.318318	137.94	4148.33	129.271	3746.33	NA	Phospho-2-dehydro-3-deoxyheptonate aldolase [Source:UniProtKB/TrEMBL%3BAcc:Q9SK84]	None
AT1G22430	-0.0668387	0.411623	0.682932	46.4901	1116.67	45.108	1051	NA	Alcohol dehydrogenase-like 1 [Source:UniProtKB/Swiss-Prot%3BAcc:Q9SK86]	None
AT1G22440	0.378717	0.00455945	0.0348391	14.3061	383	18.9758	485.333	NA	Alcohol dehydrogenase-like 2 [Source:UniProtKB/Swiss-Prot%3BAcc:Q9SK87]	None
AT1G22450	-0.00443078	0.950932	0.98342	78.3633	1536.33	78.7746	1501.67	COX6B-1	COX6B [Source:UniProtKB/TrEMBL%3BAcc:A0A178WPQ4]	None
AT1G22500	0.959483	7.042e-19	2.29521e-16	18.1056	413	35.4864	787.333	ATL15	E3 ubiquitin-protein ligase ATL15 [Source:UniProtKB/Swiss-Prot%3BAcc:Q9SK92]	None
AT1G22540	0.127967	0.386038	0.66255	5.98109	182	6.57098	195.333	NPF5.10	Protein NRT1/ PTR FAMILY 5.10 [Source:UniProtKB/Swiss-Prot%3BAcc:Q0WP01]	None
AT1G22590	-0.945494	3.99434e-09	2.66816e-07	29.0175	303	15.347	153	AGL87	AGAMOUS-like 87 [Source:UniProtKB/TrEMBL%3BAcc:Q7X9H1]	None
AT1G22610	-0.184227	0.0247268	0.12101	24.9632	1497	22.2564	1296.67	NA	C2 calcium/lipid-binding plant phosphoribosyltransferase family protein [Source:UniProtKB/TrEMBL%3BAcc:Q9SKA3]	None
AT1G22630	-0.0454334	0.745061	0.895286	79.8309	227	38.5056	215.667	NA	At1g22630/F12K8_2 [Source:UniProtKB/TrEMBL%3BAcc:Q9SKA5]	None
AT1G22640	0.289236	0.0213488	0.109282	16.4792	257.667	20.5336	310.667	MYB3	MYB3 [Source:UniProtKB/TrEMBL%3BAcc:A0A178WFN1]	None
AT1G22660	-0.0646992	0.593536	0.812447	8.25457	288	8.04002	269.667	NA	Polynucleotide adenylyltransferase family protein [Source:TAIR%3BAcc:AT1G22660]	None
AT1G22690	-0.390077	0.000189194	0.00283851	543.731	3290	414.235	2507.67	GASA9	Gibberellin-regulated protein 9 [Source:UniProtKB/Swiss-Prot%3BAcc:Q8GWK5]	None
AT1G22730	-0.00302143	0.975841	0.993143	13.4696	616.333	13.629	608	NA	MA3 domain-containing protein [Source:UniProtKB/TrEMBL%3BAcc:O80548]	None
AT1G22740	0.615389	3.15343e-06	9.45589e-05	13.5434	197.333	21.0661	295	RABG3B	Ras-related protein RABG3b [Source:UniProtKB/Swiss-Prot%3BAcc:O04157]	None
AT1G22750	-0.13846	0.237416	0.512769	51.1091	573.667	46.1892	511.333	NA	AT1G22750 protein [Source:UniProtKB/TrEMBL%3BAcc:O64379]	None
AT1G22760	0	1	NA	0	0	0	0	PAB3	Polyadenylate-binding protein 3 [Source:UniProtKB/Swiss-Prot%3BAcc:O64380]	None
AT1G22770	0.745946	1.15051e-19	4.02764e-17	8.97637	638.333	15.075	1055	GI	Protein GIGANTEA [Source:UniProtKB/Swiss-Prot%3BAcc:Q9SQI2]	None
AT1G22780	-0.122294	0.180607	0.43952	220.636	2501.67	204.525	2238.33	RPS18C	40S ribosomal protein S18 [Source:UniProtKB/Swiss-Prot%3BAcc:P34788]	None
AT1G22790	0.193748	0.132162	0.366117	14.194	286.333	16.3784	321.667	NA	Low affinity potassium transport system protein [Source:UniProtKB/TrEMBL%3BAcc:Q8L8X4]	None
AT1G22800	0.0182065	0.882827	0.958916	11.9095	294.667	12.2059	294	NA	Putative methyltransferase At1g22800%2C mitochondrial [Source:UniProtKB/Swiss-Prot%3BAcc:O80543]	None
AT1G22830	0.171763	0.446835	0.711983	1.98385	78.6667	2.2452	87.6667	PCMP-E24	Pentatricopeptide repeat-containing protein At1g22830 [Source:UniProtKB/Swiss-Prot%3BAcc:Q4V389]	None
AT1G22840	-0.112425	0.166859	0.419397	235.624	2254.33	220.409	2028	CYTC-1	CYTC-1 [Source:UniProtKB/TrEMBL%3BAcc:A0A178W284]	None
AT1G22860	0.235047	0.0136186	0.0789306	7.10896	638.333	8.69196	746.667	VPS3	Vacuolar sorting protein 39 [Source:TAIR%3BAcc:AT1G22860]	None
AT1G22880	-0.0884012	0.62053	0.829773	4.97625	154	4.6915	141	CEL5	Endoglucanase 3 [Source:UniProtKB/Swiss-Prot%3BAcc:Q2V4L8]	None
AT1G22882	0.0547373	0.614417	0.825863	9.0556	438	9.58171	450	SUN3	SUN domain-containing protein 3 [Source:UniProtKB/Swiss-Prot%3BAcc:F4I316]	None
AT1G22885	-0.403393	0.00333028	0.0276485	61.8951	296	46.9377	218.333	NA	unknown protein%3B FUNCTIONS IN: molecular_function unknown%3B INVOLVED IN: biological_process unknown%3B LOCATED IN: endomembrane system%3B EXPRESSED IN: 22 plant structures%3B EXPRESSED DURING: 13 growth stages%3B Ha. [Source:TAIR%3BAcc:AT1G22885]	None
AT1G22890	0.356733	0.11926	0.344513	12.5958	66.3333	16.3765	82.3333	NA	AT1G22890 protein [Source:UniProtKB/TrEMBL%3BAcc:A0JQ18]	None
AT1G22910	0.122172	0.186167	0.445819	23.8426	545	26.1011	580.333	NA	RNA-binding (RRM/RBD/RNP motifs) family protein [Source:UniProtKB/TrEMBL%3BAcc:F4I321]	None
AT1G22930	-0.0140538	0.856356	0.947917	47.8556	3510.33	48.5466	3431.67	NA	T-complex protein 11 [Source:UniProtKB/TrEMBL%3BAcc:O23129]	None
AT1G22940	0.1215	0.225844	0.499223	14.394	436.333	15.7207	467.667	TH1	Thiamine biosynthetic bifunctional enzyme TH1%2C chloroplastic [Source:UniProtKB/Swiss-Prot%3BAcc:Q5M731]	None
AT1G22990	0.612174	0.298091	0.579745	0.82429	8.66667	1.25063	13.3333	HIPP22	HIPP22 [Source:UniProtKB/TrEMBL%3BAcc:A0A178WF89]	None
AT1G23000	-0.115376	0.630135	0.834971	2.7341	73.6667	2.60908	66.3333	NA	Heavy metal transport/detoxification superfamily protein [Source:TAIR%3BAcc:AT1G23000]	None
AT1G23010	0.146323	0.59136	0.811195	1.33971	50	1.46647	55.6667	LPR1	Multicopper oxidase LPR1 [Source:UniProtKB/Swiss-Prot%3BAcc:F4I4K5]	None
AT1G23030	0.0634079	0.491566	0.745149	19.623	747.667	20.8453	766.667	PUB11	RING-type E3 ubiquitin transferase [Source:UniProtKB/TrEMBL%3BAcc:A0A178WCR1]	None
AT1G23040	0.27395	0.0554559	0.211513	23.6884	246.333	28.5696	288.667	NA	At1g23040 [Source:UniProtKB/TrEMBL%3BAcc:O23120]	None
AT1G23050	0.570581	0.026548	0.127377	5.18135	47.3333	7.71033	68	NA	At1g23050 [Source:UniProtKB/TrEMBL%3BAcc:O23119]	None
AT1G23100	-0.402794	0.152857	0.399005	14.2762	84.3333	10.8986	61	NA	GroES-like family protein [Source:UniProtKB/TrEMBL%3BAcc:Q8LDC9]	None
AT1G23120	0.739287	0.00375666	0.0302711	4.5777	46.6667	7.78528	77	NA	Polyketide cyclase/dehydrase and lipid transport superfamily protein [Source:TAIR%3BAcc:AT1G23120]	None
AT1G23130	0.150958	0.143108	0.383843	156.853	1978.67	176.99	2215	NA	At1g23130/T26J12_10 [Source:UniProtKB/TrEMBL%3BAcc:O49304]	None
AT1G23150	0.77773	0.000389737	0.00506363	7.34509	87	13.1227	141.667	NA	Uncharacterized protein At1g23150 [Source:UniProtKB/TrEMBL%3BAcc:Q84JS3]	None
AT1G23160	-1.41359	0.0151436	0.0854805	0.648781	19.3333	0.232986	7	NA	Auxin-responsive GH3 family protein [Source:UniProtKB/TrEMBL%3BAcc:O49301]	None
AT1G23170	-0.0239578	0.770329	0.909415	15.7128	909.667	15.9099	880.333	NA	Protein of unknown function DUF2359%2C transmembrane [Source:TAIR%3BAcc:AT1G23170]	None
AT1G23190	0.00820357	0.922038	0.972995	75.2978	2802.33	76.6551	2741.33	PGM3	Probable phosphoglucomutase%2C cytoplasmic 1 [Source:UniProtKB/Swiss-Prot%3BAcc:O49299]	None
AT1G23200	0.649973	0.0894452	0.289129	0.994278	31.3333	1.58115	47.3333	PME6	Probable pectinesterase/pectinesterase inhibitor 6 [Source:UniProtKB/Swiss-Prot%3BAcc:O49298]	None
AT1G23210	-0.0448193	0.956011	NA	0.22274	5.66667	0.218697	5.33333	AtGH9B6	Endoglucanase 4 [Source:UniProtKB/Swiss-Prot%3BAcc:O49296]	None
AT1G23220	0.112358	0.238219	0.513839	18.1692	936.333	17.7102	1010.33	NA	Dynein light chain [Source:UniProtKB/TrEMBL%3BAcc:A0A178WMH3]	None
AT1G23290	-0.246781	0.00442036	0.0341677	384.704	3396	329.967	2801.33	RPL27AB	60S ribosomal protein L27a-2 [Source:UniProtKB/Swiss-Prot%3BAcc:Q9LR33]	None
AT1G23410	-0.595265	0.0030809	0.0260821	12.6567	118	8.67703	76	RPS27AA	Ubiquitin-40S ribosomal protein S27a-1 [Source:UniProtKB/Swiss-Prot%3BAcc:P59271]	None
AT1G23440	0.178093	0.11977	0.345363	37.2575	555	43.0273	608.667	NA	Peptidase C15%2C pyroglutamyl peptidase I-like protein [Source:UniProtKB/TrEMBL%3BAcc:Q9C5G6]	None
AT1G23450	0.18921	0.250321	0.529088	5.86598	152	6.6288	171.333	NA	Tetratricopeptide repeat (TPR)-like superfamily protein [Source:TAIR%3BAcc:AT1G23450]	None
AT1G23480	-0.0445868	0.651933	0.848361	14.2035	467	14.0007	445.667	CSLA3	Glycosyltransferase (Fragment) [Source:UniProtKB/TrEMBL%3BAcc:W8Q7B4]	None
AT1G23490	-0.0963534	0.157656	0.405709	200.729	3251.67	189.56	2982.33	ARF2-A	ADP-ribosylation factor 2-B [Source:UniProtKB/Swiss-Prot%3BAcc:P0DH91]	None
AT1G23530	-0.303321	0.199198	0.464148	6.14021	104.333	5.07005	82.6667	NA	At1g23530 [Source:UniProtKB/TrEMBL%3BAcc:Q9ZUE1]	None
AT1G23550	-0.455515	0.190958	0.452549	1.94977	38.3333	1.47228	26.6667	SRO2	Probable inactive poly [ADP-ribose] polymerase SRO2 [Source:UniProtKB/Swiss-Prot%3BAcc:Q9ZUD9]	None
AT1G23710	0.395953	0.0338924	0.152439	7.04444	141.333	9.53201	182.667	NA	At1g23710 [Source:UniProtKB/TrEMBL%3BAcc:Q9ZUC4]	None
AT1G23720	0.228452	0.561029	0.792357	31.0619	820.667	34.5513	920.667	NA	Proline-rich extensin-like family protein [Source:TAIR%3BAcc:AT1G23720]	None
AT1G23730	-0.203741	0.687835	0.864921	11.401	177	10.119	149	BCA3	Beta carbonic anhydrase 3 [Source:UniProtKB/Swiss-Prot%3BAcc:Q9ZUC2]	None
AT1G23750	0.361057	0.0114394	0.0697359	15.3505	198.333	20.1664	247.333	NA	F5O8.30 protein [Source:UniProtKB/TrEMBL%3BAcc:Q9ZUC0]	None
AT1G23760	0.54011	2.03229e-05	0.000461206	8.01655	298.667	11.7135	427.333	PGL1	Polygalacturonase 1 beta-like protein 1 [Source:UniProtKB/Swiss-Prot%3BAcc:P92982]	None
AT1G23790	-0.377857	0.0991004	0.308711	3.3004	103.333	2.58334	77.3333	NA	At1g23790 [Source:UniProtKB/TrEMBL%3BAcc:Q9ZUB7]	None
AT1G23820	-0.228864	0.0011348	0.011918	87.7989	1890.67	75.9708	1576.67	SPDSYN1	Spermidine synthase 1 [Source:UniProtKB/Swiss-Prot%3BAcc:Q9ZUB3]	None
AT1G23870	0.250958	0.000939764	0.0102158	25.5125	1641.33	31.8756	1910.33	TPS9	Probable alpha%2Calpha-trehalose-phosphate synthase [UDP-forming] 9 [Source:UniProtKB/Swiss-Prot%3BAcc:Q9LRA7]	None
AT1G23900	-0.0939242	0.346721	0.628496	12.3961	709	11.6908	649.667	GAMMA-ADR	AP-1 complex subunit gamma-1 [Source:UniProtKB/Swiss-Prot%3BAcc:Q84K16]	None
AT1G24030	0.209711	0.443645	0.710094	1.79251	46	2.05842	53.6667	PBL28	Probable serine/threonine-protein kinase PBL28 [Source:UniProtKB/Swiss-Prot%3BAcc:Q84M95]	None
AT1G24050	0.0332102	0.703414	0.873882	59.6642	1167.33	61.9499	1168.67	NA	At1g24050/T23E23_11 [Source:UniProtKB/TrEMBL%3BAcc:Q8L466]	None
AT1G24090	-0.570127	0.0179734	0.0968831	4.66614	83	3.39777	56	NA	RNase H domain-containing protein [Source:UniProtKB/TrEMBL%3BAcc:F4I7R5]	None
AT1G24145	-1.08342	0.245398	NA	0.935632	6	0.454266	2.66667	NA	At1g24145 [Source:UniProtKB/TrEMBL%3BAcc:Q8GYP2]	None
AT1G24147	1.88501	0.0241322	0.119111	0.499666	4	1.93372	14.3333	NA	Transmembrane protein [Source:UniProtKB/TrEMBL%3BAcc:Q1G3U1]	None
AT1G24148	-0.145545	0.52049	0.767319	7.70573	98	7.1185	85.6667	NA	unknown protein%3B FUNCTIONS IN: molecular_function unknown%3B INVOLVED IN: biological_process unknown%3B LOCATED IN: cellular_component unknown%3B BEST Arabidopsis thaliana protein match is: unknown protein (TAIR:AT1G24147.1). [Source:TAIR%3BAcc:AT1G24148]	None
AT1G24150	0.110529	0.502868	0.753998	5.26693	197.333	5.82898	206	ATFH4	formin homologue 4 [Source:TAIR%3BAcc:AT1G24150]	None
AT1G24240	-0.568326	0.0632395	0.231055	3.67828	48	2.50323	31.3333	NA	At1g24240/F3I6_17 [Source:UniProtKB/TrEMBL%3BAcc:O48691]	None
AT1G24265	-0.123895	0.588936	0.809216	4.76817	95.3333	4.27884	88.3333	NA	Protein of unknown function (DUF1664) [Source:TAIR%3BAcc:AT1G24265]	None
AT1G24280	0.190117	0.0398608	0.169561	19.3174	712.667	22.2186	804	G6PD3	Glucose-6-phosphate 1-dehydrogenase [Source:UniProtKB/TrEMBL%3BAcc:A0A178WP00]	None
AT1G24310	-0.223012	0.0461374	0.187083	16.0958	384.333	13.9284	322.667	NUP54	Nuclear pore complex protein NUP54 [Source:UniProtKB/Swiss-Prot%3BAcc:Q8GYF7]	None
AT1G24330	0.0186092	0.946327	0.982123	1.00717	47.6667	1.03517	47.3333	PUB6	U-box domain-containing protein 6 [Source:UniProtKB/Swiss-Prot%3BAcc:O48700]	None
AT1G24340	0.16947	0.12349	0.351071	12.7203	526.667	14.4481	578.667	EMB260	FAD/NAD(P)-binding oxidoreductase family protein [Source:UniProtKB/TrEMBL%3BAcc:Q8GYJ7]	None
AT1G24360	-0.249954	0.000136952	0.00219587	129.031	2928.67	109.196	2418.67	NA	3-oxoacyl-[acyl-carrier-protein] reductase%2C chloroplastic [Source:UniProtKB/Swiss-Prot%3BAcc:P33207]	None
AT1G24405	-0.613933	0.519607	NA	1.19404	5.33333	0.814317	3.33333	NA	F21J9.7 [Source:UniProtKB/TrEMBL%3BAcc:Q9FYM2]	None
AT1G24420	1.02852	0.126895	0.356968	0.36427	6.66667	0.776279	13.3333	NA	F21J9.8 [Source:UniProtKB/TrEMBL%3BAcc:Q9FYM1]	None
AT1G24440	0.00854374	0.953436	0.983883	9.93252	189.333	10.0498	187.333	NA	F21J9.10 [Source:UniProtKB/TrEMBL%3BAcc:Q9FYL9]	None
AT1G24450	0.114057	0.452975	0.716212	18.1344	174.667	19.6253	188	NFD2	Protein NUCLEAR FUSION DEFECTIVE 2 [Source:UniProtKB/Swiss-Prot%3BAcc:Q9FYL8]	None
AT1G24460	-0.00988692	0.920405	0.972682	8.32884	956.333	8.44992	943.333	NA	TGN-related%2C localized SYP41 interacting protein [Source:UniProtKB/TrEMBL%3BAcc:F4I9A1]	None
AT1G24470	0.45545	0.374905	0.654426	0.805279	12.6667	1.13921	16.3333	KCR2	Very-long-chain 3-oxoacyl-CoA reductase-like protein At1g24470 [Source:UniProtKB/Swiss-Prot%3BAcc:Q9FYL6]	None
AT1G24485	-2.81267	0.421267	NA	0.0368684	1.33333	0	0	NA	FUNCTIONS IN: molecular_function unknown%3B INVOLVED IN: biological_process unknown%3B LOCATED IN: endomembrane system%3B BEST Arabidopsis thaliana protein match is: protein kinase-related (TAIR:AT3G46280.1)%3B Ha. [Source:TAIR%3BAcc:AT1G24485]	None
AT1G24490	-0.0942022	0.457146	0.719199	8.32802	257	7.86123	237.333	ALB4	ALBINO3-like protein 1%2C chloroplastic [Source:UniProtKB/Swiss-Prot%3BAcc:Q9FYL3]	None
AT1G24520	-1.44935	0.329414	NA	0.557385	3.33333	0.204543	1.33333	BCP1	BCP1 [Source:UniProtKB/TrEMBL%3BAcc:A0A178W8R9]	None
AT1G24530	0.401958	0.00785956	0.0518413	11.5981	246	15.3244	320.667	NA	F21J9.19 [Source:UniProtKB/TrEMBL%3BAcc:Q9FYL1]	None
AT1G24540	-0.295823	0.634844	0.837884	0.340511	11	0.285058	8.66667	CYP86C1	Cytochrome P450%2C family 86%2C subfamily C%2C polypeptide 1 [Source:UniProtKB/TrEMBL%3BAcc:Q9FYL0]	None
AT1G24560	0.0889182	0.270443	0.551641	16.9592	864.333	18.3699	905.667	NA	Paramyosin [Source:UniProtKB/TrEMBL%3BAcc:Q8LPK7]	None
AT1G24570	-0.00704008	0.99338	NA	0.202361	5.66667	0.230746	5.33333	NA	Protein of unknown function (DUF707) [Source:TAIR%3BAcc:AT1G24570]	None
AT1G24580	-0.600319	0.307047	0.587745	1.881	13	1.19186	9	NA	F21J9.24 [Source:UniProtKB/TrEMBL%3BAcc:Q9FYK6]	None
AT1G24600	-0.774857	0.110834	0.329607	5.97038	22	3.49531	13	NA	At1g24600 [Source:UniProtKB/TrEMBL%3BAcc:Q9FYK4]	None
AT1G24650	-0.00310748	0.999168	NA	0.0107453	0.333333	0.00816007	0.333333	TMK2	Receptor-like kinase TMK2 [Source:UniProtKB/Swiss-Prot%3BAcc:Q9FYK0]	None
AT1G24706	-0.0735751	0.429968	0.698472	10.2618	1179.67	9.89446	1112.67	THO2	THO complex subunit 2 [Source:UniProtKB/Swiss-Prot%3BAcc:F4IAT2]	None
AT1G24735	0.198759	0.682393	0.863335	1.596	19	1.4296	21	NA	S-adenosyl-L-methionine-dependent methyltransferases superfamily protein [Source:UniProtKB/TrEMBL%3BAcc:F4IAT4]	None
AT1G24793	1.51937	0.539942	NA	0.0142702	0.333333	0.0373659	1	LPXC5	Probable UDP-3-O-acyl-N-acetylglucosamine deacetylase 3%2C mitochondrial [Source:UniProtKB/Swiss-Prot%3BAcc:P0DKB8]	None
AT1G25240	1.17018	0.105165	0.319671	0.249031	4.66667	0.593958	10	NA	ENTH/VHS/GAT family protein [Source:TAIR%3BAcc:AT1G25240]	None
AT1G25250	0.313604	0.234884	0.510009	1.60724	49	2.26627	59	AtIDD16	IDD16 [Source:UniProtKB/TrEMBL%3BAcc:A0A178WG74]	None
AT1G25275	0.0107609	0.89559	0.964014	397.768	2428	404.054	2362.67	NA	AT1G25275 protein [Source:UniProtKB/TrEMBL%3BAcc:B9DG55]	None
AT1G25280	-0.0741029	0.421326	0.691007	24.0147	781	23.0453	729.667	TULP10	Tubby-like F-box protein 10 [Source:UniProtKB/Swiss-Prot%3BAcc:Q9FRH7]	None
AT1G25290	-0.0321956	0.799075	0.922619	13.9601	282	13.7642	269	RBL10	RHOMBOID-like protein 10%2C chloroplastic [Source:UniProtKB/Swiss-Prot%3BAcc:F4ICF4]	None
AT1G25320	0.128486	0.430868	0.699166	4.13235	158.333	4.57785	169	NA	At1g25320/F4F7_17 [Source:UniProtKB/TrEMBL%3BAcc:Q9FRI1]	None
AT1G25360	-0.466907	0.0971528	0.304472	1.48288	64.3333	1.05765	48	PCMP-H74	Pentatricopeptide repeat-containing protein At1g25360 [Source:UniProtKB/Swiss-Prot%3BAcc:Q9FRI5]	None
AT1G25380	-0.0563342	0.55118	0.786786	20.4263	587	19.8037	553.333	NDT2	Nicotinamide adenine dinucleotide transporter 2%2C mitochondrial [Source:UniProtKB/Swiss-Prot%3BAcc:Q8RWA5]	None
AT1G25420	0.159901	0.171221	0.425162	20.24	383.333	22.7546	423.333	NA	At1g25420/F2J7_16 [Source:UniProtKB/TrEMBL%3BAcc:Q9C6L2]	None
AT1G25422	0.373153	0.685249	NA	0.194747	3.66667	0.253109	4.66667	NA	Putative uncharacterized protein [Source:UniProtKB/TrEMBL%3BAcc:Q1G3T8]	None
AT1G25425	-0.0707891	0.890887	0.962307	3.23978	20.3333	3.34914	18	CLE43	CLAVATA3/ESR (CLE)-related protein 43 [Source:UniProtKB/Swiss-Prot%3BAcc:Q6IWB1]	None
AT1G25460	-0.0161082	0.976461	0.993143	0.667268	11.3333	0.73197	11	NA	NAD(P)-binding Rossmann-fold superfamily protein [Source:TAIR%3BAcc:AT1G25460]	None
AT1G25480	0.0668392	0.674193	0.859103	6.66427	190.333	7.10556	198	ALMT4	Aluminum-activated malate transporter 4 [Source:UniProtKB/Swiss-Prot%3BAcc:Q9C6L8]	None
AT1G25490	-0.0878286	0.220272	0.492318	54.2946	1912	51.4457	1770	PP2AA1	Serine/threonine-protein phosphatase 2A 65 kDa regulatory subunit A alpha isoform [Source:UniProtKB/Swiss-Prot%3BAcc:Q38845]	None
AT1G25520	0.0408828	0.704924	0.874638	25.2142	418.667	26.3282	421	NA	GDT1-like protein 4 [Source:UniProtKB/Swiss-Prot%3BAcc:Q9C6M1]	None
AT1G25550	0.0631724	0.390972	0.66621	59.4703	1333.67	63.0743	1365.67	HHO3	Transcription factor HHO3 [Source:UniProtKB/Swiss-Prot%3BAcc:Q9FPE8]	None
AT1G26090	0.148394	0.212439	0.482445	10.6916	290.667	11.857	318	NA	Uncharacterized protein At1g26090%2C chloroplastic [Source:UniProtKB/Swiss-Prot%3BAcc:Q6DYE4]	None
AT1G26130	0.0813571	0.606544	0.820644	2.65828	221.667	2.85619	228.667	NA	Phospholipid-transporting ATPase [Source:UniProtKB/TrEMBL%3BAcc:F4IE35]	None
AT1G26180	-0.175417	0.11547	0.337435	21.749	371.667	19.3558	324	NA	Membrane protein [Source:UniProtKB/TrEMBL%3BAcc:Q8VYA7]	None
AT1G26210	0.0863924	0.484026	0.739361	17.4495	306.333	18.8895	320	ATSOFL1	At1g26210 [Source:UniProtKB/TrEMBL%3BAcc:Q67YG7]	None
AT1G26220	-0.389154	0.000155242	0.00243049	52.102	550	40.4179	409.667	NA	Acyl-CoA N-acyltransferases (NAT) superfamily protein [Source:UniProtKB/TrEMBL%3BAcc:Q9C666]	None
AT1G26250	0.977724	4.4462e-13	6.18022e-11	29.0173	381.333	55.1344	719	NA	Proline-rich extensin-like family protein [Source:UniProtKB/TrEMBL%3BAcc:Q9C669]	None
AT1G26260	0.173437	0.338896	0.620844	5.47384	138.667	6.24497	156.333	BHLH76	Transcription factor bHLH76 [Source:UniProtKB/Swiss-Prot%3BAcc:Q9C670]	None
AT1G26290	-0.504668	0.203874	0.470896	2.54505	27.3333	1.88144	18.6667	NA	Uncharacterized protein F28B23.5 [Source:UniProtKB/TrEMBL%3BAcc:Q9C673]	None
AT1G26320	0	1	NA	0	0	0	0	NA	Allyl alcohol dehydrogenase%2C putative [Source:UniProtKB/TrEMBL%3BAcc:Q9C677]	None
AT1G26330	-0.243244	0.310999	0.592296	1.02288	73	0.85039	61.6667	NA	DNA binding protein [Source:UniProtKB/TrEMBL%3BAcc:F4IE60]	None
AT1G26340	-0.0107334	0.942979	0.980903	20.1804	194.667	20.372	187.667	CB5-A	CB5-A [Source:UniProtKB/TrEMBL%3BAcc:A0A178WMK3]	None
AT1G26460	-0.0928281	0.282875	0.565331	19.8432	769.333	18.7757	711.333	NA	Pentatricopeptide repeat-containing protein At1g26460%2C mitochondrial [Source:UniProtKB/Swiss-Prot%3BAcc:Q9FZD1]	None
AT1G26470	-0.157743	0.260718	0.540596	24.8248	225.333	22.6387	199.667	NA	Chromatin modification-like protein [Source:UniProtKB/TrEMBL%3BAcc:Q9FZD2]	None
AT1G26500	0.184871	0.697265	0.870326	0.550062	16.3333	0.652291	17.6667	NA	Putative pentatricopeptide repeat-containing protein At1g26500 [Source:UniProtKB/Swiss-Prot%3BAcc:Q9FZD4]	None
AT1G26530	-0.020283	0.929105	0.975604	3.56872	77.3333	3.40665	74.6667	NA	PIN domain-like family protein [Source:UniProtKB/TrEMBL%3BAcc:F4HP91]	None
AT1G26550	-0.0329174	0.69499	0.868806	133.777	1777.67	134.499	1689.33	NA	Peptidyl-prolyl cis-trans isomerase [Source:UniProtKB/TrEMBL%3BAcc:Q9FE18]	None
AT1G26560	-0.22899	0.138707	0.3762	8.48665	255	7.29794	218.333	BGLU40	Beta-glucosidase 40 [Source:UniProtKB/Swiss-Prot%3BAcc:Q9FZE0]	None
AT1G26570	-0.226733	0.144176	0.385584	7.03664	206.333	6.04313	174.667	UGD1	UDP-glucose 6-dehydrogenase [Source:UniProtKB/TrEMBL%3BAcc:A0A178WCI2]	None
AT1G26580	0.185611	0.0519301	0.203163	29.7256	1439.67	34.2043	1624.33	NA	At1g26580 [Source:UniProtKB/TrEMBL%3BAcc:Q9FZE2]	None
AT1G26590	0.634343	0.465501	NA	0.223571	4	0.360668	6	NA	C2H2-like zinc finger protein [Source:TAIR%3BAcc:AT1G26590]	None
AT1G26600	0.0299779	0.928494	0.975445	5.58993	36.6667	5.69275	37.3333	CLE9	CLAVATA3/ESR-RELATED 9 [Source:TAIR%3BAcc:AT1G26600]	None
AT1G26610	-0.294814	0.689873	NA	0.259719	7.66667	0.223323	6	NA	C2H2-like zinc finger protein [Source:UniProtKB/TrEMBL%3BAcc:Q9FZE5]	None
AT1G26630	-0.186865	0.00514529	0.0380691	1072.59	11366.7	947.307	9730.67	ELF5A-2	Eukaryotic translation initiation factor 5A-2 [Source:UniProtKB/Swiss-Prot%3BAcc:Q93VP3]	None
AT1G26650	-0.0919159	0.485291	0.740312	15.5169	294.667	14.6459	273	NA	Son of sevenless protein [Source:UniProtKB/TrEMBL%3BAcc:Q9LQY7]	None
AT1G26660	0.0598367	0.784588	0.916264	8.23732	96.3333	8.64265	98.6667	NA	Prefoldin chaperone subunit family protein [Source:UniProtKB/TrEMBL%3BAcc:F4HPA5]	None
AT1G26665	0.340148	0.00288102	0.0248575	31.1213	324.333	39.5163	404.333	NA	Mediator complex%2C subunit Med10 [Source:TAIR%3BAcc:AT1G26665]	None
AT1G26670	0.198402	0.00929977	0.0594934	72.6343	1281.67	84.9046	1449	VTI12	VTI1B [Source:UniProtKB/TrEMBL%3BAcc:A0A178W140]	None
AT1G26680	0.319796	0.789335	NA	0.0452944	2.33333	0.054587	3	NA	transcriptional factor B3 family protein [Source:TAIR%3BAcc:AT1G26680]	None
AT1G26700	-1.22789	0.121879	NA	0.323522	8.66667	0.136459	3.66667	MLO14	MLO-like protein 14 [Source:UniProtKB/Swiss-Prot%3BAcc:Q94KB1]	None
AT1G26730	0.147488	0.634308	0.837592	0.951534	38.3333	1.09657	41.6667	PHO1-H7	Phosphate transporter PHO1 homolog 7 [Source:UniProtKB/Swiss-Prot%3BAcc:Q6R8G3]	None
AT1G26750	-0.118207	0.293612	0.575712	32.8897	419	30.7134	375.667	NA	unknown protein%3B Ha. [Source:TAIR%3BAcc:AT1G26750]	None
AT1G26770	-0.288201	0.0123935	0.0740903	36.3691	783	29.744	633	ATEXPA10	Expansin [Source:UniProtKB/TrEMBL%3BAcc:F4HPC1]	None
AT1G26780	-0.141288	0.817669	0.930831	0.666428	12	0.668695	10.6667	MYB117	MYB117 [Source:UniProtKB/TrEMBL%3BAcc:A0A178WCI3]	None
AT1G26830	0.0553205	0.485199	0.740245	24.2525	1185.33	25.6305	1211.33	CUL3A	CUL3A [Source:UniProtKB/TrEMBL%3BAcc:A0A178WM88]	None
AT1G26840	-0.271573	0.282752	0.565205	4.86448	78.3333	4.09075	63.3333	ORC6	Origin of replication complex subunit 6 [Source:UniProtKB/Swiss-Prot%3BAcc:Q9ZVH3]	None
AT1G26870	-0.78512	0.494029	NA	0.189365	3.66667	0.112884	2	FEZ	Protein FEZ [Source:UniProtKB/Swiss-Prot%3BAcc:Q9ZVH0]	None
AT1G26890	-0.708069	0.433798	NA	0.21227	5	0.148342	3	NA	FBD%2C F-box and Leucine Rich Repeat domains containing protein [Source:UniProtKB/TrEMBL%3BAcc:F4HR18]	None
AT1G26910	-0.174393	0.201247	0.46708	26.2728	304.333	23.2898	264	RPL10B	60S ribosomal protein L10-2 [Source:UniProtKB/Swiss-Prot%3BAcc:Q08770]	None
AT1G26920	-0.0279291	0.775036	0.911802	54.9358	581	54.7422	559.333	NA	T2P11.11 protein [Source:UniProtKB/TrEMBL%3BAcc:Q9ZVG6]	None
AT1G26940	-0.019923	0.897497	0.964439	17.3281	246	17.3661	236.667	CYP23	Peptidyl-prolyl cis-trans isomerase CYP23 [Source:UniProtKB/Swiss-Prot%3BAcc:Q8LDR3]	None
AT1G26945	0.3391	0.0783738	0.266759	15.4166	100.667	19.2807	126	PRE6	Transcription factor PRE6 [Source:UniProtKB/Swiss-Prot%3BAcc:Q8GW32]	None
AT1G26960	-0.00697727	0.969701	0.990799	9.36686	166	9.65965	160.667	ATHB-23	Homeobox-leucine zipper protein ATHB-23 [Source:UniProtKB/Swiss-Prot%3BAcc:Q8LFD3]	None
AT1G26970	0.363677	0.375915	0.655477	0.979187	24.6667	1.24396	31.6667	PBL4	Probable serine/threonine-protein kinase PBL4 [Source:UniProtKB/Swiss-Prot%3BAcc:Q5PP29]	None
AT1G27000	0.111132	0.151693	0.39712	46.8754	1249.33	51.5018	1316.67	NA	At1g27000/T7N9_6 [Source:UniProtKB/TrEMBL%3BAcc:Q9C5M5]	None
AT1G27020	0.229261	0.257757	0.537284	130.074	2730.33	155.316	3028.67	NA	Plant/protein [Source:UniProtKB/TrEMBL%3BAcc:O04551]	None
AT1G27030	0.152891	0.155711	0.403053	22.1656	404.333	25.0303	441.333	NA	At1g27030/T7N9_9 [Source:UniProtKB/TrEMBL%3BAcc:Q9LFY3]	None
AT1G27045	-0.746753	0.113596	0.33397	1.82532	26.3333	1.10063	16	NA	Homeobox-leucine zipper protein family [Source:TAIR%3BAcc:AT1G27045]	None
AT1G27050	-0.327338	0.0318451	0.145446	16.303	224.667	13.1156	176.667	ATHB54	Uncharacterized protein At1g27050 [Source:UniProtKB/Swiss-Prot%3BAcc:P0CJ66]	None
AT1G27060	0.18418	0.499514	0.751158	2.64371	50	3.08162	55	NA	At1g27060 [Source:UniProtKB/TrEMBL%3BAcc:A2RVN2]	None
AT1G27080	0.829811	0.722117	NA	0.00950247	0.333333	0.0222091	0.666667	NPF2.12	Protein NRT1/ PTR FAMILY 2.12 [Source:UniProtKB/Swiss-Prot%3BAcc:Q9LFX9]	None
AT1G27120	-0.1124	0.50071	0.752179	3.73379	168.333	3.46144	153.667	GALT4	Hydroxyproline O-galactosyltransferase GALT4 [Source:UniProtKB/Swiss-Prot%3BAcc:Q8GXG6]	None
AT1G27130	-0.00244715	0.984391	0.995318	19.5893	306	19.8693	295.667	GSTU13	Glutathione S-transferase U13 [Source:UniProtKB/Swiss-Prot%3BAcc:Q9FUS6]	None
AT1G27140	-0.332449	0.329669	0.611526	3.81632	36	3.06087	28.3333	GSTU14	GSTU14 [Source:UniProtKB/TrEMBL%3BAcc:A0A178WN03]	None
AT1G27150	0.340696	0.00402784	0.0320451	10.3167	304.667	13.2514	378	NA	T7N9.21 [Source:UniProtKB/TrEMBL%3BAcc:Q9LFX3]	None
AT1G27170	0.395425	0.112642	0.332664	0.745201	58.3333	0.981219	77.3333	NA	Transmembrane receptors / ATP binding protein [Source:UniProtKB/TrEMBL%3BAcc:F4HR53]	None
AT1G27180	0.489945	0.517066	NA	0.0554638	5.66667	0.0840637	7.33333	NA	Disease resistance protein (TIR-NBS-LRR class) [Source:UniProtKB/TrEMBL%3BAcc:F4HR54]	None
AT1G27280	-0.00310747	0.999392	NA	0.039482	0.333333	0.042408	0.333333	NA	Paired amphipathic helix (PAH2) superfamily protein [Source:UniProtKB/TrEMBL%3BAcc:F4HR64]	None
AT1G27290	0.127439	0.231262	0.505495	65.1531	647	71.7853	690	NA	Transmembrane protein [Source:UniProtKB/TrEMBL%3BAcc:Q94F23]	None
AT1G27300	0.131447	0.300714	0.582329	16.4293	258.667	18.3877	278.333	NA	F17L21.9 [Source:UniProtKB/TrEMBL%3BAcc:Q9FZK5]	None
AT1G27320	-0.0340791	0.674688	0.859165	31.9173	2332	31.656	2267.67	AHK3	HK3 [Source:UniProtKB/TrEMBL%3BAcc:A0A178WL02]	None
AT1G27330	-0.0533984	0.602987	0.818365	134.683	624.333	132.766	582.667	NA	At1g27330 [Source:UniProtKB/TrEMBL%3BAcc:Q84K46]	None
AT1G27340	-0.0426106	0.591886	0.811622	27.6744	894	27.0578	858.667	FBX6	F-box only protein 6 [Source:UniProtKB/Swiss-Prot%3BAcc:Q9FZK1]	None
AT1G27360	-0.0548163	0.789469	0.918769	4.38079	105.333	4.16679	101.667	SPL11	Squamosa promoter-binding-like protein 11 [Source:UniProtKB/Swiss-Prot%3BAcc:Q9FZK0]	None
AT1G27400	-0.317303	9.56961e-05	0.00166119	282.81	3171.33	227.586	2501.33	RPL17A	60S ribosomal protein L17-1 [Source:UniProtKB/Swiss-Prot%3BAcc:Q93VI3]	None
AT1G27410	0.0380979	0.796821	0.921459	4.353	175.667	4.32779	177	NA	DNA repair metallo-beta-lactamase family protein [Source:UniProtKB/TrEMBL%3BAcc:Q9FZJ4]	None
AT1G27450	-0.138595	0.0890737	0.288578	204.785	3132.67	188.674	2781.67	APT1	Adenine phosphoribosyl transferase 1 [Source:UniProtKB/TrEMBL%3BAcc:F4HSX1]	None
AT1G27460	-0.0555755	0.595349	0.813376	11.0781	513	10.7521	487	NPGR1	Protein NPGR1 [Source:UniProtKB/Swiss-Prot%3BAcc:Q9CB03]	None
AT1G27480	-0.191628	0.0206157	0.106455	38.8749	1001.67	34.1547	865.667	LCAT1	Lecithin-cholesterol acyltransferase-like 1 [Source:UniProtKB/Swiss-Prot%3BAcc:Q9FZI8]	None
AT1G27520	0.171077	0.0924824	0.295169	16.2995	646.667	18.3993	723	MNS5	Alpha-mannosidase I MNS5 [Source:UniProtKB/Swiss-Prot%3BAcc:Q9SXC9]	None
AT1G27565	0.135269	0.451067	0.71471	6.20345	130.667	6.89	142.667	NA	unknown protein%3B FUNCTIONS IN: molecular_function unknown%3B INVOLVED IN: biological_process unknown%3B LOCATED IN: cellular_component unknown%3B BEST Arabidopsis thaliana protein match is: unknown protein (TAIR:AT1G52905.1)%3B Ha. [Source:TAIR%3BAcc:AT1G27565]	None
AT1G27590	-0.0253253	0.784695	0.916291	14.6468	777	15.1795	750.667	NA	NA	None
AT1G27620	0.205225	0.378223	0.657585	3.07688	67.6667	3.55931	76.6667	NA	At1g27620 [Source:UniProtKB/TrEMBL%3BAcc:Q9S808]	None
AT1G27630	-0.0398353	0.746576	0.895967	19.3319	542.333	18.7113	524.333	CYCT1-3	Cyclin-T1-3 [Source:UniProtKB/Swiss-Prot%3BAcc:Q8LBC0]	None
AT1G27650	0.0931223	0.220847	0.493137	40.3974	1205.33	43.8056	1262	U2AF35A	Splicing factor U2af small subunit A [Source:UniProtKB/Swiss-Prot%3BAcc:Q9S709]	None
AT1G27660	0.361362	0.175996	0.432334	1.6575	49	2.16506	62	BHLH110	Transcription factor bHLH110 [Source:UniProtKB/Swiss-Prot%3BAcc:Q9SFZ3]	None
AT1G27680	-0.334769	0.0273522	0.130043	8.95159	270	7.09301	211.333	APL2	Glucose-1-phosphate adenylyltransferase large subunit 2%2C chloroplastic [Source:UniProtKB/Swiss-Prot%3BAcc:P55230]	None
AT1G27690	-0.0977956	0.451645	0.715127	9.97011	266.667	9.38827	244.667	NA	Lipase%2C putative (DUF620) [Source:UniProtKB/TrEMBL%3BAcc:Q8RWY0]	None
AT1G27695	-0.039608	0.799053	0.922619	22.2123	179.667	21.8461	170	TGD5	Protein TRIGALACTOSYLDIACYLGLYCEROL 5%2C chloroplastic [Source:UniProtKB/Swiss-Prot%3BAcc:Q8VY77]	None
AT1G27740	0.564671	0.200938	0.466644	1.4088	25.3333	2.18363	35.6667	BHLH54	Transcription factor bHLH54 [Source:UniProtKB/Swiss-Prot%3BAcc:Q8LEG1]	None
AT1G27750	0.136073	0.19988	0.464935	7.77348	464.333	8.55691	502.333	NA	Nucleic acid binding protein [Source:UniProtKB/TrEMBL%3BAcc:Q8RWY8]	None
AT1G27752	0.225944	0.0184042	0.0985704	9.92691	584	11.8161	669.333	NA	Ubiquitin system component Cue protein [Source:UniProtKB/TrEMBL%3BAcc:B3H6L4]	None
AT1G27760	0.00781192	0.929994	0.975942	35.2532	994	35.6957	988	SAT32	SAT32 [Source:UniProtKB/TrEMBL%3BAcc:A0A178WAC4]	None
AT1G27820	0	1	NA	0	0	0	0	CAF1-3	Putative CCR4-associated factor 1 homolog 3 [Source:UniProtKB/Swiss-Prot%3BAcc:Q9SFX6]	None
AT1G27850	-0.0816943	0.455184	0.717798	8.4085	657.667	8.00271	617	NA	RUN/FYVE domain protein [Source:UniProtKB/TrEMBL%3BAcc:Q9C6N3]	None
AT1G27880	-0.142424	0.484068	0.739361	2.54119	123.667	2.28633	112.333	RECQL5	ATP-dependent DNA helicase Q-like 5 [Source:UniProtKB/Swiss-Prot%3BAcc:Q0WVW7]	None
AT1G27920	0.0847728	0.705598	0.874836	1.84497	70	1.98081	73.6667	MAP65-8	65-kDa microtubule-associated protein 8 [Source:UniProtKB/Swiss-Prot%3BAcc:Q9C7G0]	None
AT1G27950	-0.172578	0.0040706	0.0322507	398.83	4125.67	356.638	3582.33	LTPG1	Non-specific lipid transfer protein GPI-anchored 1 [Source:UniProtKB/Swiss-Prot%3BAcc:Q9C7F7]	None
AT1G27970	-0.127973	0.140595	0.379221	220.325	1552	201.832	1383.67	NTF2B	Nuclear transport factor 2B [Source:UniProtKB/TrEMBL%3BAcc:A8MS55]	None
AT1G27980	0.0149301	0.874838	0.955379	23.4771	765	24.1037	753.667	DPL1	Sphingosine-1-phosphate lyase [Source:UniProtKB/Swiss-Prot%3BAcc:Q9C509]	None
AT1G28010	-0.275056	0.0117123	0.071101	9.97112	699.333	8.33851	572.333	ABCB14	ABC transporter B family member 14 [Source:UniProtKB/Swiss-Prot%3BAcc:Q9C7F2]	None
AT1G28060	0.12357	0.133545	0.368257	15.4432	917	17.2426	983	RDM16	Protein RDM16 [Source:UniProtKB/Swiss-Prot%3BAcc:Q9C7E7]	None
AT1G28070	0.351889	0.310733	0.592087	2.85269	30	3.81992	36.3333	NA	ATP-dependent RNA helicase [Source:UniProtKB/TrEMBL%3BAcc:Q9C7E6]	None
AT1G28080	-0.52267	0.38868	0.664461	0.646349	11	0.442887	7.66667	NA	RING finger protein [Source:TAIR%3BAcc:AT1G28080]	None
AT1G28090	-0.0434285	0.724627	0.884107	10.75	337	10.4435	325.333	NA	Polynucleotide adenylyltransferase family protein [Source:UniProtKB/TrEMBL%3BAcc:F4HUW0]	None
AT1G28100	0.336096	0.0323492	0.147108	6.93714	164	8.34421	206	NA	unknown protein%3B Ha. [Source:TAIR%3BAcc:AT1G28100]	None
AT1G28130	0.017392	0.889431	0.961668	12.9191	433	13.5687	427	GH3.17	GH3.17 [Source:UniProtKB/TrEMBL%3BAcc:A0A178WH43]	None
AT1G28160	0.958681	0.814255	NA	0	0	0.0330803	0.333333	ERF087	Ethylene-responsive transcription factor ERF087 [Source:UniProtKB/Swiss-Prot%3BAcc:Q9FZ90]	None
AT1G28170	1.20675	0.268669	NA	0.209152	3	0.517183	6.66667	SOT7	Cytosolic sulfotransferase 7 [Source:UniProtKB/Swiss-Prot%3BAcc:Q9FZ91]	None
AT1G28210	-0.166638	0.303984	0.585144	6.22538	192	5.66401	165.667	ATJ1	DNAJ heat shock family protein [Source:UniProtKB/TrEMBL%3BAcc:F4HWI4]	None
AT1G28250	-0.0528506	0.721222	0.882001	22.377	197.667	21.7789	186.667	NA	F3H9.10 protein [Source:UniProtKB/TrEMBL%3BAcc:Q9FZ98]	None
AT1G28340	-0.183042	0.00733101	0.0491426	25.06	1484	22.5481	1286.33	AtRLP4	Receptor-like protein 4 [Source:UniProtKB/Swiss-Prot%3BAcc:F4HWL3]	None
AT1G28360	-0.562687	0.246604	0.524714	1.81175	17.3333	1.21166	11.6667	ERF12	Ethylene-responsive transcription factor 12 [Source:UniProtKB/Swiss-Prot%3BAcc:Q94ID6]	None
AT1G28380	0.0334602	0.717737	0.880246	22.645	808.667	23.303	817	NSL1	NSL1 [Source:UniProtKB/TrEMBL%3BAcc:A0A178WFB2]	None
AT1G28420	-0.0253137	0.767207	0.907419	10.0431	1117	10.0318	1087.67	RLT1	Homeobox-DDT domain protein RLT1 [Source:UniProtKB/Swiss-Prot%3BAcc:F4HY56]	None
AT1G28440	-0.0992164	0.214524	0.485581	39.6464	2242	37.3683	2055	HSL1	Receptor-like protein kinase HSL1 [Source:UniProtKB/Swiss-Prot%3BAcc:Q9SGP2]	None
AT1G28470	-0.38017	0.183712	0.442953	2.41002	51.6667	1.85414	39.6667	NAC010	NAC domain-containing protein 10 [Source:UniProtKB/Swiss-Prot%3BAcc:F4HY61]	None
AT1G28490	0.0235317	0.830329	0.936828	22.5001	433.333	23.4301	430.667	SYP61	Syntaxin-61 [Source:UniProtKB/Swiss-Prot%3BAcc:Q946Y7]	None
AT1G28510	0.0758559	0.494718	0.747504	27.1911	373.333	29.1228	386.667	NA	At1g28510/F3M18_5 [Source:UniProtKB/TrEMBL%3BAcc:Q9SGP9]	None
AT1G28520	0.117513	0.216115	0.487016	22.3471	842.333	24.5416	903.333	VOZ1	Transcription factor VOZ1 [Source:UniProtKB/Swiss-Prot%3BAcc:Q9SGQ0]	None
AT1G28540	0.287931	0.0791603	0.269	20.1035	166.667	25.0309	196.667	NA	At1g28540 [Source:UniProtKB/TrEMBL%3BAcc:Q9SHP5]	None
AT1G28680	0.0474777	0.591123	0.810936	27.1493	781.333	28.2738	796.667	NA	Anthranilate N-hydroxycinnamoyl/benzoyltransferase%2C putative [Source:UniProtKB/TrEMBL%3BAcc:Q8LF28]	None
AT1G28815	0.126022	0.685567	0.86404	2.58333	37.3333	5.14745	40	NA	F1K23.7 [Source:UniProtKB/TrEMBL%3BAcc:Q9SHQ5]	None
AT1G28760	0.00276116	0.990592	0.997095	3.30449	72	3.33719	71.3333	NA	F1K23.6 [Source:UniProtKB/TrEMBL%3BAcc:Q9SHQ6]	None
AT1G29000	0.128001	0.805735	0.926103	1.16778	16	1.25617	18.3333	HIPP04	Heavy metal-associated isoprenylated plant protein 4 [Source:UniProtKB/Swiss-Prot%3BAcc:Q9SHQ8]	None
AT1G29040	0.0593815	0.575651	0.802042	22.3259	465.333	23.7031	474	NA	50S ribosomal protein L34 [Source:UniProtKB/TrEMBL%3BAcc:Q8LDL9]	None
AT1G29060	-0.0334024	0.853736	0.946787	11.2581	118	11.0824	113.333	NA	Bet1-like protein At1g29060 [Source:UniProtKB/Swiss-Prot%3BAcc:Q8L9S0]	None
AT1G29070	-0.325829	0.000223563	0.00324596	735.032	6828.33	594.665	5313.67	RPL34	50S ribosomal protein L34%2C chloroplastic [Source:UniProtKB/Swiss-Prot%3BAcc:Q9LP37]	None
AT1G29100	0.331001	0.876608	NA	0.263809	1	0.323352	1.33333	NA	Heavy metal transport/detoxification superfamily protein [Source:TAIR%3BAcc:AT1G29100]	None
AT1G29110	-0.264039	0.795413	NA	0.241758	4.66667	0.19145	3.66667	NA	Cysteine proteinases superfamily protein [Source:UniProtKB/TrEMBL%3BAcc:F4HZW2]	None
AT1G29120	-0.241825	0.00525417	0.0386327	39.6928	1185	33.6577	999.333	NA	AT1G29120 protein [Source:UniProtKB/TrEMBL%3BAcc:C0Z2A9]	None
AT1G29150	-0.115057	0.0864532	0.283524	71.6602	1775.33	66.9877	1608	RPN6	26S proteasome non-ATPase regulatory subunit 11 homolog [Source:UniProtKB/Swiss-Prot%3BAcc:Q9LP45]	None
AT1G29179	0.332532	0.36102	0.64175	1.20282	24	1.54569	30.3333	NA	BEST Arabidopsis thaliana protein match is: Cysteine/Histidine-rich C1 domain family protein (TAIR:AT1G44030.1)%3B Ha. [Source:TAIR%3BAcc:AT1G29179]	None
AT1G29200	0.0431686	0.919396	0.972382	0.658355	23.3333	0.706245	22.6667	OFUT8	O-fucosyltransferase 8 [Source:UniProtKB/Swiss-Prot%3BAcc:F4HZX7]	None
AT1G29230	-0.126115	0.867456	NA	0.184827	5.66667	0.176016	5	CIPK18	Non-specific serine/threonine protein kinase [Source:UniProtKB/TrEMBL%3BAcc:A0A178WD98]	None
AT1G29260	0.101792	0.372243	0.652046	16.9799	357	18.5017	373.667	PEX7	Peroxisome biogenesis protein 7 [Source:UniProtKB/Swiss-Prot%3BAcc:Q9XF57]	None
AT1G29270	0.0386797	0.942199	0.980637	1.72261	16	1.83195	16	NA	unknown protein%3B BEST Arabidopsis thaliana protein match is: unknown protein (TAIR:AT2G40435.1)%3B Ha. [Source:TAIR%3BAcc:AT1G29270]	None
AT1G29280	0.268264	0.00961373	0.0609654	33.1715	551.333	40.2443	644.667	WRKY65	At1g29280 [Source:UniProtKB/TrEMBL%3BAcc:Q0V866]	None
AT1G29290	0.576067	0.24992	0.528585	1.85104	12	2.82211	17.3333	CEP14	Precursor of CEP14 [Source:UniProtKB/Swiss-Prot%3BAcc:Q52K95]	None
AT1G29310	-0.026842	0.763171	0.904891	27.4018	658.667	26.9986	635	NA	SecY protein transport family protein [Source:UniProtKB/TrEMBL%3BAcc:Q8RWJ5]	None
AT1G29320	-0.12597	0.33804	0.62031	9.69888	273	8.9896	247.667	NA	Transducin/WD40 repeat-like superfamily protein [Source:TAIR%3BAcc:AT1G29320]	None
AT1G29340	-0.21038	0.0212382	0.108863	19.661	885	17.2935	756	PUB17	RING-type E3 ubiquitin transferase [Source:UniProtKB/TrEMBL%3BAcc:A0A178WA68]	None
AT1G29355	0.309438	0.143247	0.384057	4.41305	88.3333	5.57876	108	NA	unknown protein%3B Ha. [Source:TAIR%3BAcc:AT1G29355]	None
AT1G29380	-0.335536	0.169288	0.422249	2.59946	72	2.073	55.6667	NA	Beta-1%2C3 glucanase [Source:UniProtKB/TrEMBL%3BAcc:Q6DST9]	None
AT1G29418	-0.24393	0.443698	0.710094	17.1013	41	14.5088	33.6667	NA	unknown protein%3B FUNCTIONS IN: molecular_function unknown%3B INVOLVED IN: biological_process unknown%3B LOCATED IN: endomembrane system%3B Ha. [Source:TAIR%3BAcc:AT1G29418]	None
AT1G29465	-0.324138	0.259934	0.539769	14.5915	46.6667	11.6553	36.6667	NA	Putative uncharacterized protein [Source:UniProtKB/TrEMBL%3BAcc:Q0WQY3]	None
AT1G29490	1.8018	0.0126147	0.075132	0.748235	5.66667	2.7594	19	SAUR68	Auxin-responsive protein SAUR68 [Source:UniProtKB/Swiss-Prot%3BAcc:Q29Q96]	None
AT1G29500	0.137461	0.50953	0.759299	14.6686	103.667	16.5021	111.333	SAUR66	Auxin-responsive protein SAUR66 [Source:UniProtKB/Swiss-Prot%3BAcc:Q9C7Q1]	None
AT1G29510	0.00628893	0.977723	0.993223	15.7673	86.6667	16.0555	86.3333	SAUR67	Auxin-responsive protein SAUR67 [Source:UniProtKB/Swiss-Prot%3BAcc:F4I1I4]	None
AT1G29520	-0.105563	0.433111	0.701471	22.4141	253	20.6591	231.667	NA	AWPM-19-like family protein [Source:UniProtKB/TrEMBL%3BAcc:Q9C7P9]	None
AT1G29540	0.511146	0.66409	NA	0.424249	4	0.640733	5	NA	LOW protein: protein BOBBER-like protein [Source:UniProtKB/TrEMBL%3BAcc:Q5BPY8]	None
AT1G29550	0.0584758	0.646082	0.844059	8.74358	327.667	10.0518	337.667	EIF4E3	Eukaryotic translation initiation factor 4E-3 [Source:UniProtKB/Swiss-Prot%3BAcc:Q9C7P6]	None
AT1G29590	-0.344482	0.64664	0.844528	0.780018	11	0.653733	8	EIF4E2	Eukaryotic translation initiation factor 4E-2 [Source:UniProtKB/Swiss-Prot%3BAcc:Q9C7P2]	None
AT1G29600	1.23758	0.443918	NA	0.0371383	1	0.092383	2.33333	NA	Zinc finger C-x8-C-x5-C-x3-H type family protein [Source:TAIR%3BAcc:AT1G29600]	None
AT1G29630	-0.0325676	0.871623	0.954092	2.57309	107	2.50666	104.333	EXO1	Exonuclease 1 [Source:UniProtKB/Swiss-Prot%3BAcc:Q8L6Z7]	None
AT1G29660	-0.239721	0.0109079	0.0672111	142.102	3023	121.008	2534	NA	GDSL esterase/lipase At1g29660 [Source:UniProtKB/Swiss-Prot%3BAcc:Q9C7N5]	None
AT1G29670	0.389929	8.44589e-09	5.21768e-07	177.28	3561.33	233.651	4561.33	NA	GDSL-like Lipase/Acylhydrolase superfamily protein [Source:TAIR%3BAcc:AT1G29670]	None
AT1G29710	-0.190974	0.41596	0.687172	3.07402	75	2.7154	65	PCMP-H67	Pentatricopeptide repeat-containing protein At1g29710%2C mitochondrial [Source:UniProtKB/Swiss-Prot%3BAcc:Q9C6G2]	None
AT1G29760	0.137258	0.237021	0.512547	11.8568	337	13.0794	362	SEI2	Seipin-2 [Source:UniProtKB/Swiss-Prot%3BAcc:F4I340]	None
AT1G29780	0.657681	0.460473	NA	0.446483	3.66667	0.676762	6	NA	At1g29780 [Source:UniProtKB/TrEMBL%3BAcc:A2RVS1]	None
AT1G29790	-0.0791736	0.438084	0.705833	22.0519	488	20.9449	454	NA	At1g29790 [Source:UniProtKB/TrEMBL%3BAcc:Q8RWB7]	None
AT1G29800	-0.112033	0.419707	0.689926	7.54426	264.333	7.06456	240.333	NA	RING/FYVE/PHD-type zinc finger family protein [Source:UniProtKB/TrEMBL%3BAcc:Q84WW7]	None
AT1G29820	-0.127242	0.241206	0.517863	11.3394	375	10.4882	339.333	NA	Magnesium transporter CorA-like family protein [Source:UniProtKB/TrEMBL%3BAcc:F4I348]	None
AT1G29830	1.01039	0.279268	NA	0.0484502	2.33333	0.106907	4.66667	NA	Magnesium transporter CorA-like family protein [Source:UniProtKB/TrEMBL%3BAcc:F4I350]	None
AT1G29850	-0.104333	0.221481	0.493968	78.5787	1134.33	75.1541	1031	NA	double-stranded DNA-binding family protein [Source:TAIR%3BAcc:AT1G29850]	None
AT1G29860	0.869632	0.430631	NA	0.153009	2	0.277755	3.66667	WRKY71	WRKY transcription factor 71 [Source:UniProtKB/Swiss-Prot%3BAcc:Q93WV4]	None
AT1G29890	-0.102103	0.299272	0.580966	21.9356	606	20.6061	554.667	NA	O-acetyltransferase family protein [Source:TAIR%3BAcc:AT1G29890]	None
AT1G29900	-0.217432	0.00103316	0.0110281	53.2673	3773.33	46.2597	3200.67	CARB	Carbamoyl-phosphate synthase large chain%2C chloroplastic [Source:UniProtKB/Swiss-Prot%3BAcc:Q42601]	None
AT1G29930	0.119127	0.198214	0.462769	21017.1	389984	22678.7	416920	LHCB1.3	Chlorophyll a-b binding protein 1%2C chloroplastic [Source:UniProtKB/Swiss-Prot%3BAcc:P04778]	None
AT1G29950	0.0380259	0.687873	0.864921	25.3277	817	26.1672	834.667	BHLH144	Transcription factor bHLH144 [Source:UniProtKB/Swiss-Prot%3BAcc:Q9ASX9]	None
AT1G29960	0.053193	0.861048	0.949559	11.0855	44.6667	9.8282	45.6667	NA	Peptidase S24/S26A/S26B/S26C family protein [Source:UniProtKB/TrEMBL%3BAcc:Q67XF2]	None
AT1G29990	0.0190417	0.838001	0.940431	47.8895	520	49.8801	516.667	PFD6	At1g29990 [Source:UniProtKB/TrEMBL%3BAcc:Q2HIK4]	None
AT1G30010	0.342109	0.143425	0.384363	1.60565	74	2.07553	91.3333	NMAT1	Nuclear intron maturase 1%2C mitochondrial [Source:UniProtKB/Swiss-Prot%3BAcc:Q9C8R8]	None
AT1G30040	0.276563	0.290056	0.571825	1.99799	45	2.40883	54	GA2OX2	Gibberellin 2-beta-dioxygenase 2 [Source:UniProtKB/Swiss-Prot%3BAcc:Q9XFR9]	None
AT1G30050	0.768865	0.431329	NA	0.144513	3.33333	0.267803	5.33333	NA	Tropomyosin [Source:UniProtKB/TrEMBL%3BAcc:Q9C8R6]	None
AT1G30100	1.83695	0.284174	NA	0.0199819	0.666667	0.0740559	2.33333	NCED5	Probable 9-cis-epoxycarotenoid dioxygenase NCED5%2C chloroplastic [Source:UniProtKB/Swiss-Prot%3BAcc:Q9C6Z1]	None
AT1G30110	0.312684	0.0365859	0.159912	15.9339	267	20.4671	320	NUDT25	Nudix hydrolase 25 [Source:UniProtKB/Swiss-Prot%3BAcc:Q9C6Z2]	None
AT1G30130	0.0581652	0.533453	0.774531	34.6582	633.333	36.5951	642.667	NA	AT1G30130 protein [Source:UniProtKB/TrEMBL%3BAcc:Q9C6Z4]	None
AT1G30135	1.89704	0.528348	NA	0	0	0.154828	0.666667	TIFY5A	Protein TIFY 5A [Source:UniProtKB/Swiss-Prot%3BAcc:Q8LBM2]	None
AT1G30160	0.331321	0.515046	0.763272	0.729682	12.6667	0.911564	16.3333	NA	At1g30160 [Source:UniProtKB/TrEMBL%3BAcc:Q6DBP6]	None
AT1G30190	0.955701	0.576465	NA	0.0663008	0.666667	0.122558	1.33333	NA	Cotton fiber protein [Source:UniProtKB/TrEMBL%3BAcc:Q9C6Z9]	None
AT1G30200	0.395623	9.43846e-06	0.000241761	22.3383	570.667	29.622	740	NA	F-box protein At1g30200 [Source:UniProtKB/Swiss-Prot%3BAcc:Q9C534]	None
AT1G30230	0.179317	0.0135318	0.0786099	430.531	6485.67	496.081	7205.67	NA	Translation elongation factor EF1B/ribosomal protein S6 family protein [Source:UniProtKB/TrEMBL%3BAcc:A8MRC4]	None
AT1G30260	0.310351	0.0965059	0.303552	15.2553	112.333	19.3075	135.333	NA	At1g30260/F12P21_9 [Source:UniProtKB/TrEMBL%3BAcc:Q9C754]	None
AT1G30270	0.10549	0.14896	0.393025	36.5531	1408.67	40.3362	1493	CIPK23	CBL-interacting serine/threonine-protein kinase 23 [Source:UniProtKB/Swiss-Prot%3BAcc:Q93VD3]	None
AT1G30300	0.211869	0.230079	0.504197	6.35826	128.667	7.44234	144.333	NA	At1g30300 [Source:UniProtKB/TrEMBL%3BAcc:Q6NNG9]	None
AT1G30320	0.0335548	0.781916	0.91514	8.34533	285	8.69762	288.667	NA	Remorin family protein [Source:UniProtKB/TrEMBL%3BAcc:Q9C8G3]	None
AT1G30360	-0.0709889	0.25755	0.537279	123.758	4959.67	118.288	4658	ERD4	Hyperosmolality-gated Ca2+ permeable channel 3.1 [Source:UniProtKB/TrEMBL%3BAcc:A0A097NUQ9]	None
AT1G30380	-0.332803	4.40197e-10	3.64977e-08	3128.67	36611.7	2492.67	28634.3	PSAK	Photosystem I reaction center subunit psaK%2C chloroplastic [Source:UniProtKB/Swiss-Prot%3BAcc:Q9SUI5]	None
AT1G30400	-0.0216521	0.814221	0.929639	42.4023	4257	42.1455	4132.33	ABCC1	ABC transporter C family member 1 [Source:UniProtKB/Swiss-Prot%3BAcc:Q9C8G9]	None
AT1G30410	0.288449	0.00124308	0.0128309	9.86755	930.333	12.1961	1117.67	ATMRP13	multidrug resistance-associated protein 13 [Source:TAIR%3BAcc:AT1G30410]	None
AT1G30420	0.234656	0.0773666	0.264569	2.19947	203.333	2.56548	235.333	ABCC11	ABC transporter C family member 11 [Source:UniProtKB/Swiss-Prot%3BAcc:Q9C8H1]	None
AT1G30440	-0.0786805	0.364359	0.644748	28.8927	1361.33	27.6672	1265.67	NA	BTB/POZ domain-containing protein At1g30440 [Source:UniProtKB/Swiss-Prot%3BAcc:Q9S9Q9]	None
AT1G30450	0.0707662	0.405809	0.679181	11.7578	767	12.4304	794.333	CCC1	Cation-chloride cotransporter 1 [Source:UniProtKB/Swiss-Prot%3BAcc:Q2UVJ5]	None
AT1G30455	0.958686	0.725168	NA	0	0	0.0287981	0.333333	NA	Cyclin/Brf1-like TBP-binding domain-containing protein [Source:UniProtKB/TrEMBL%3BAcc:F4I4V4]	None
AT1G30470	-0.226164	0.00327237	0.0272956	23.1937	1198	20.1063	1005.33	NA	SIT4 phosphatase-associated family protein [Source:UniProtKB/TrEMBL%3BAcc:F4I6B2]	None
AT1G30480	0.0978785	0.432579	0.701026	8.84013	288.333	9.74911	300.667	DRT111	DNA-damage-repair/toleration protein DRT111%2C chloroplastic [Source:UniProtKB/Swiss-Prot%3BAcc:P42698]	None
AT1G30520	0.10785	0.302121	0.583678	14.4581	480.333	15.6142	516.333	AAE14	2-succinylbenzoate--CoA ligase%2C chloroplastic/peroxisomal [Source:UniProtKB/Swiss-Prot%3BAcc:Q8VYJ1]	None
AT1G30530	-0.44883	1.02747e-05	0.000259669	20.6069	602.667	15.233	435	UGT78D1	Glycosyltransferase (Fragment) [Source:UniProtKB/TrEMBL%3BAcc:W8PVA4]	None
AT1G30560	0.986685	0.431125	NA	0.0740395	2	0.158773	3.66667	NA	G3Pp3 [Source:UniProtKB/TrEMBL%3BAcc:A0A178WI18]	None
AT1G30570	-0.182759	0.0864353	0.283524	10.1121	451.333	9.04238	392.667	HERK2	Probable receptor-like protein kinase At1g30570 [Source:UniProtKB/Swiss-Prot%3BAcc:Q9SA72]	None
AT1G30610	-0.213816	0.0402338	0.170668	7.98997	526.667	7.00787	445.333	EMB2279	Pentatricopeptide repeat-containing protein At1g30610%2C chloroplastic [Source:UniProtKB/Swiss-Prot%3BAcc:Q9SA76]	None
AT1G30620	0.0194609	0.885612	0.96012	7.18282	236	7.26067	237	MUR4	UXE1 [Source:UniProtKB/TrEMBL%3BAcc:A0A384K925]	None
AT1G30640	0.396443	0.0103897	0.0647185	5.54008	224.667	7.46786	285.667	NA	Non-specific serine/threonine protein kinase [Source:UniProtKB/TrEMBL%3BAcc:F4I6E4]	None
AT1G30650	0.174223	0.228426	0.502873	9.09959	239	10.1799	260.667	WRKY14	Probable WRKY transcription factor 14 [Source:UniProtKB/Swiss-Prot%3BAcc:Q9SA80]	None
AT1G30660	0.068656	0.909925	0.969231	0.516461	10.6667	0.570663	11	NA	Primase homolog protein [Source:UniProtKB/Swiss-Prot%3BAcc:F4I6E6]	None
AT1G30680	-0.324993	0.00191756	0.0181339	13.1402	664	10.6392	523.333	NA	Twinkle homolog protein%2C chloroplastic/mitochondrial [Source:UniProtKB/Swiss-Prot%3BAcc:B5X582]	None
AT1G30690	-0.148622	0.0342442	0.153159	39.4948	1557.67	36.7607	1373.67	PATL4	Patellin-4 [Source:UniProtKB/Swiss-Prot%3BAcc:Q94C59]	None
AT1G30700	0.230272	0.441643	0.708367	13.2682	442.333	15.716	496	NA	Berberine bridge enzyme-like 8 [Source:UniProtKB/Swiss-Prot%3BAcc:Q9SA85]	None
AT1G30720	0.580541	9.07366e-05	0.00160815	8.10188	260	12.3955	373.667	NA	Berberine bridge enzyme-like 10 [Source:UniProtKB/Swiss-Prot%3BAcc:Q9SA87]	None
AT1G30730	0.822511	0.0057785	0.0415272	1.76656	58	3.21494	97.6667	NA	Berberine bridge enzyme-like 11 [Source:UniProtKB/Swiss-Prot%3BAcc:Q9SA88]	None
AT1G30740	3.21898	0.0371829	NA	0.0098851	0.333333	0.125334	3.33333	NA	FAD-binding Berberine family protein [Source:TAIR%3BAcc:AT1G30740]	None
AT1G30757	-0.00522402	0.989123	0.996501	3.35174	26.6667	3.38876	26	NA	Putative uncharacterized protein [Source:UniProtKB/TrEMBL%3BAcc:Q8LGA4]	None
AT1G30760	0.950229	3.41246e-07	1.36095e-05	2.29562	86	4.43991	165	NA	FAD-binding Berberine family protein [Source:TAIR%3BAcc:AT1G30760]	None
AT1G30800	1.76444	0.632946	NA	0	0	0.055009	0.666667	NA	At1g30800 [Source:UniProtKB/TrEMBL%3BAcc:Q9SY22]	None
AT1G30825	-0.182588	0.224189	0.497556	11.234	193.333	9.984	167	ARPC2A	Actin-related protein 2/3 complex subunit 2A [Source:UniProtKB/Swiss-Prot%3BAcc:Q8LGI3]	None
AT1G30840	0.669035	0.00552321	0.0401092	2.56184	57.3333	4.13311	89.3333	PUP4	Probable purine permease 4 [Source:UniProtKB/Swiss-Prot%3BAcc:Q9SY29]	None
AT1G30845	0.277989	0.319321	0.601311	5.55769	45	6.81928	53	NA	Cell growth defect factor-2 [Source:UniProtKB/TrEMBL%3BAcc:Q3C1C7]	None
AT1G30850	2.35443	0.0526965	NA	0.0606576	1	0.312342	5	RSH4	Root hair specific 4 [Source:UniProtKB/TrEMBL%3BAcc:Q9SY31]	None
AT1G30870	0.197767	0.611225	0.823531	20.4026	384.333	23.2105	414.333	PER7	Peroxidase 7 [Source:UniProtKB/Swiss-Prot%3BAcc:Q9SY33]	None
AT1G30890	-0.178992	0.197764	0.462081	19.1242	306	17.0431	261.667	NA	Integral membrane HRF1 family protein [Source:UniProtKB/TrEMBL%3BAcc:Q94BQ9]	None
AT1G30900	0.33402	0.0174801	0.0949463	5.28864	182.333	6.78839	225.667	VSR6	Vacuolar-sorting receptor 6 [Source:UniProtKB/Swiss-Prot%3BAcc:Q9FYH7]	None
AT1G30910	0.0627184	0.554124	0.788139	22.441	380.667	23.7314	389.333	NA	F17F8.22 [Source:UniProtKB/TrEMBL%3BAcc:Q9FYH8]	None
AT1G30950	1.87992	0.293125	NA	0.0356574	0.666667	0.142902	2.33333	UFO	Uncharacterized protein At1g30950 (Fragment) [Source:UniProtKB/TrEMBL%3BAcc:C0SUY4]	None
AT1G30990	0.423305	0.463423	0.723783	1.69168	11	2.34997	14	NA	F17F8.9 [Source:UniProtKB/TrEMBL%3BAcc:Q9FYJ0]	None
AT1G31020	0.096018	0.575004	0.80154	11.9644	134	12.9357	140	ATO2	Thioredoxin O2%2C mitochondrial [Source:UniProtKB/Swiss-Prot%3BAcc:Q93VQ9]	None
AT1G31070	-0.132387	0.1656	0.417481	17.9817	570.333	16.6611	509.333	GLCNAC1PUT1	GlcNAc1pUT1 [Source:UniProtKB/TrEMBL%3BAcc:A0A178W850]	None
AT1G31080	1.983	0.293051	NA	0.0308096	0.666667	0.141534	2.33333	NA	F-box protein At1g31080 [Source:UniProtKB/Swiss-Prot%3BAcc:Q9SA02]	None
AT1G31090	1.9005	0.637546	NA	0	0	0.0495893	0.666667	NA	Putative F-box protein At1g31090 [Source:UniProtKB/Swiss-Prot%3BAcc:Q9SA03]	None
AT1G31140	0.958684	0.764205	NA	0	0	0.0303436	0.333333	AGL63	GOA [Source:UniProtKB/TrEMBL%3BAcc:A0A178W639]	None
AT1G31150	-0.0647077	0.719828	0.881571	3.13633	125	3.04246	117.333	NA	F28K20.8 protein [Source:UniProtKB/TrEMBL%3BAcc:Q9SA08]	None
AT1G31170	-0.0342377	0.771959	0.910306	44.369	316.333	44.6981	303.667	ATSRX	Sulfiredoxin [Source:UniProtKB/TrEMBL%3BAcc:F4I7W2]	None
AT1G31175	0.122207	0.425516	0.694583	4.9746	159.333	5.43789	171	NA	At1g31175 [Source:UniProtKB/TrEMBL%3BAcc:Q9SA13]	None
AT1G31190	-0.223371	0.00874207	0.0566153	36.8406	882.333	31.6925	745.333	IMPL1	Phosphatase IMPL1%2C chloroplastic [Source:UniProtKB/Swiss-Prot%3BAcc:Q94F00]	None
AT1G31220	-0.065898	0.711762	0.877708	6.83994	134	6.59905	125	PUR3	Phosphoribosylglycinamide formyltransferase%2C chloroplastic [Source:UniProtKB/Swiss-Prot%3BAcc:P52422]	None
AT1G31280	0.443577	0.00114472	0.0119946	2.73229	195	3.78125	261.333	AGO2	Protein argonaute 2 [Source:UniProtKB/Swiss-Prot%3BAcc:Q9SHF3]	None
AT1G31290	-0.499026	0.478414	0.735494	0.141724	10.6667	0.100094	7.66667	AGO3	Protein argonaute 3 [Source:UniProtKB/Swiss-Prot%3BAcc:Q9SHF2]	None
AT1G31300	-0.0222576	0.836187	0.939748	26.3146	443.667	26.0477	430.333	NA	At1g31300/T19E23_12 [Source:UniProtKB/TrEMBL%3BAcc:Q93Z82]	None
AT1G31320	-0.548982	0.0298722	0.13851	3.83129	65	2.6239	44	LBD4	LOB domain-containing protein 4 [Source:UniProtKB/Swiss-Prot%3BAcc:Q9SHE9]	None
AT1G31360	-0.0138335	0.934078	0.977123	3.49909	146	3.4615	143.667	RECQL2	RECQ helicase L2 [Source:TAIR%3BAcc:AT1G31360]	None
AT1G31420	-0.13422	0.102755	0.315388	57.688	2319.67	52.9104	2101.33	FEI1	Leucine-rich repeat protein kinase family protein [Source:UniProtKB/TrEMBL%3BAcc:F4I9D5]	None
AT1G31480	0.210203	0.125985	0.355414	4.33878	237.333	5.05719	271.333	SGR2	Phospholipase SGR2 [Source:UniProtKB/Swiss-Prot%3BAcc:Q8W5R2]	None
AT1G31670	-2.12972	0.403132	NA	0.0222917	0.666667	0	0	NA	AT1G31670	None
AT1G31710	0.160097	0.114527	0.335611	24.5378	1014.33	27.6288	1123.33	NA	Amine oxidase [Source:UniProtKB/TrEMBL%3BAcc:F4IAX1]	None
AT1G31720	-1.03103	0.076113	0.261798	1.31327	15.6667	0.657251	7.33333	NA	At1g31720 [Source:UniProtKB/TrEMBL%3BAcc:A2RVU1]	None
AT1G31730	-0.0310517	0.710434	0.87723	32.7138	1500.33	32.6874	1444.33	NA	AP-4 complex subunit epsilon [Source:UniProtKB/Swiss-Prot%3BAcc:Q8L7A9]	None
AT1G31780	0.132186	0.119828	0.345363	20.53	830	22.7656	888.333	NA	At1g31780 [Source:UniProtKB/TrEMBL%3BAcc:Q6NMI3]	None
AT1G31800	-0.160183	0.0406476	0.172081	50.0136	1762.67	45.4231	1559.33	CYP97A3	Protein LUTEIN DEFICIENT 5%2C chloroplastic [Source:UniProtKB/Swiss-Prot%3BAcc:Q93VK5]	None
AT1G31840	0.390788	0.322883	0.604394	0.604668	26.3333	0.786319	34.3333	NA	Putative pentatricopeptide repeat-containing protein At1g31840 [Source:UniProtKB/Swiss-Prot%3BAcc:Q9C6S6]	None
AT1G31850	-0.132427	0.107097	0.322897	34.2061	1358.67	31.4028	1219.67	NA	Probable methyltransferase PMT20 [Source:UniProtKB/Swiss-Prot%3BAcc:Q9C6S7]	None
AT1G31870	-0.126922	0.228965	0.503532	10.4064	418.333	9.72451	378	NA	AT1G31870 protein [Source:UniProtKB/TrEMBL%3BAcc:Q9C6S8]	None
AT1G31880	-0.0688322	0.736562	0.891134	5.3401	114.333	4.21434	106.333	NLM9	DZC (Disease resistance/zinc finger/chromosome condensation-like region) domain containing protein [Source:TAIR%3BAcc:AT1G31880]	None
AT1G31910	-0.0173612	0.786683	0.917368	74.5381	3127.67	74.5245	3055	PMK	Phosphomevalonate kinase%2C peroxisomal [Source:UniProtKB/Swiss-Prot%3BAcc:Q9C6T1]	None
AT1G31930	0.0822503	0.384549	0.662116	12.7161	742	13.7221	773.333	XLG3	Extra-large guanine nucleotide-binding protein 3 [Source:UniProtKB/Swiss-Prot%3BAcc:Q9C516]	None
AT1G31950	0.230078	0.283641	0.566025	2.36091	89.6667	2.69224	103.333	NA	Terpenoid cyclases/Protein prenyltransferases superfamily protein [Source:TAIR%3BAcc:AT1G31950]	None
AT1G31970	-0.302108	3.04695e-05	0.000654009	44.3076	1588.67	36.8266	1264.67	RH5	STRS1 [Source:UniProtKB/TrEMBL%3BAcc:A0A178W5E1]	None
AT1G31990	0.255272	0.799728	NA	0.168998	3	0.213841	3.33333	NA	Transmembrane protein [Source:UniProtKB/TrEMBL%3BAcc:Q56Y48]	None
AT1G32050	-0.0364398	0.599814	0.816622	109.52	2057.67	107.902	1959.67	SCAMP4	Secretory carrier-associated membrane protein 4 [Source:UniProtKB/Swiss-Prot%3BAcc:Q9C6X2]	None
AT1G32060	-0.267473	3.50723e-06	0.000103433	1032.33	24459	867.743	20041.3	PRK	Phosphoribulokinase [Source:UniProtKB/TrEMBL%3BAcc:A0A178WLP9]	None
AT1G32120	-0.0772001	0.664488	0.853947	6.22002	128.667	5.91841	120.333	NA	FUNCTIONS IN: molecular_function unknown%3B INVOLVED IN: biological_process unknown%3B LOCATED IN: membrane%3B EXPRESSED IN: 14 plant structures%3B EXPRESSED DURING: 4 anthesis%2C C globular stage%2C F mature embryo stage%2C petal differentiation and expansion st /.../ expanded cotyledon stage%3B CONTAINS InterPro DOMAIN/s: Aminotransferase-like%2C plant mobile domain (InterPro:IPR019557)%2C Prot…	None
AT1G32150	0.00550175	0.970209	0.990889	7.78423	210.333	7.86479	209.333	BZIP68	bZIP transcription factor 68 [Source:UniProtKB/Swiss-Prot%3BAcc:Q84LG2]	None
AT1G32160	-0.122652	0.119203	0.344513	57.9192	1175.67	53.9454	1068.33	NA	At1g32160/F3C3_6 [Source:UniProtKB/TrEMBL%3BAcc:Q9FVR1]	None
AT1G32170	0.372668	0.00384716	0.0308426	26.4561	453.667	34.6963	569.667	XTH30	Probable xyloglucan endotransglucosylase/hydrolase protein 30 [Source:UniProtKB/Swiss-Prot%3BAcc:Q38908]	None
AT1G32220	-0.520569	5.52045e-09	3.57393e-07	81.1907	1396.67	57.2282	954.333	NA	Uncharacterized protein At1g32220%2C chloroplastic [Source:UniProtKB/Swiss-Prot%3BAcc:Q9FVR6]	None
AT1G32225	0.958681	0.814255	NA	0	0	0.059925	0.333333	NA	unknown protein%3B FUNCTIONS IN: molecular_function unknown%3B INVOLVED IN: biological_process unknown%3B LOCATED IN: chloroplast%3B Ha. [Source:TAIR%3BAcc:AT1G32225]	None
AT1G32230	0.122464	0.058401	0.218346	75.0686	4011.33	82.4406	4306.33	RCD1	Poly [ADP-ribose] polymerase [Source:UniProtKB/TrEMBL%3BAcc:M5BF30]	None
AT1G32310	0.226537	0.216562	0.487541	16.062	123	19.2127	140.333	SAMBA	Protein SAMBA [Source:UniProtKB/Swiss-Prot%3BAcc:Q9C613]	None
AT1G32360	0.142448	0.178613	0.436466	14.0168	446.667	15.6898	486	NA	Zinc finger CCCH domain-containing protein 12 [Source:UniProtKB/Swiss-Prot%3BAcc:Q9LQM3]	None
AT1G32370	-0.116481	0.409746	0.681373	25.5571	220.333	22.345	200.333	TOM2B	tobamovirus multiplication 2B [Source:TAIR%3BAcc:AT1G32370]	None
AT1G32375	-0.68157	0.611419	NA	0.166241	2.66667	0.101869	1.66667	NA	Probable FBD-associated F-box protein At1g32375 [Source:UniProtKB/Swiss-Prot%3BAcc:Q9LQM1]	None
AT1G32380	-0.39241	0.0018934	0.0179537	11.4461	298.667	8.74141	225	PRS2	Ribose-phosphate pyrophosphokinase 2%2C chloroplastic [Source:UniProtKB/Swiss-Prot%3BAcc:Q42583]	None
AT1G32410	-0.0887455	0.387373	0.663186	42.6549	549.667	40.0932	503.333	NA	Vacuolar protein sorting-associated protein 55 homolog [Source:UniProtKB/Swiss-Prot%3BAcc:Q9AST6]	None
AT1G32440	-0.268471	0.00405427	0.0321662	27.8329	927	23.3406	759.333	PKP3	Plastidial pyruvate kinase 3%2C chloroplastic [Source:UniProtKB/Swiss-Prot%3BAcc:Q93Z53]	None
AT1G32460	0.192111	0.0909321	0.292045	77.3681	604	89.918	668.333	NA	F5D14.24 protein [Source:UniProtKB/TrEMBL%3BAcc:Q9LQL1]	None
AT1G32510	0.188539	0.930587	NA	0.0536983	0.666667	0.0711583	0.666667	ANAC011	NAC011 [Source:UniProtKB/TrEMBL%3BAcc:A0A178WL27]	None
AT1G32540	-0.343974	0.0027817	0.0242063	35.8942	577.667	28.4715	448.667	LOL1	lsd one like 1 [Source:TAIR%3BAcc:AT1G32540]	None
AT1G32560	0.608219	0.46818	NA	0.314205	4	0.483414	6	LEA6	Late embryogenesis abundant protein 6 [Source:UniProtKB/Swiss-Prot%3BAcc:Q39138]	None
AT1G32570	-1.30724	0.342214	NA	0.684309	3.33333	0.261174	1.33333	NA	Uncharacterized protein T9G5.6 [Source:UniProtKB/TrEMBL%3BAcc:Q9C7Y3]	None
AT1G32580	-0.141824	0.108008	0.324452	57.2476	710.667	52.362	633	MORF5	Multiple organellar RNA editing factor 5%2C chloroplastic/mitochondrial [Source:UniProtKB/Swiss-Prot%3BAcc:Q9C7Y2]	None
AT1G32583	-0.0919407	0.789365	0.918769	1.34966	32.3333	1.30239	29.3333	TDL1	TPD1 protein homolog 1 [Source:UniProtKB/Swiss-Prot%3BAcc:Q1G3T1]	None
AT1G32630	0.232843	0.284886	0.567144	4.89686	70.3333	5.82688	82.3333	NA	At1g32630 [Source:UniProtKB/TrEMBL%3BAcc:Q9LPJ9]	None
AT1G32700	0.199155	0.0543548	0.208833	40.7378	594.333	47.6024	664	NA	PLATZ transcription factor family protein [Source:UniProtKB/TrEMBL%3BAcc:F4IEB6]	None
AT1G32730	-0.380781	0.0513422	0.201457	5.40278	120.667	4.20422	91	NA	Electron carrier/iron ion-binding protein [Source:UniProtKB/TrEMBL%3BAcc:Q9LPJ1]	None
AT1G32740	-0.497589	0.0127942	0.0757002	4.57335	117.667	3.27936	81.6667	NA	SBP (S-ribonuclease binding protein) family protein [Source:UniProtKB/TrEMBL%3BAcc:Q8LCK5]	None
AT1G32760	-0.0573823	0.793734	0.920212	4.03468	75.6667	3.91099	71.6667	NA	At1g32760 [Source:UniProtKB/TrEMBL%3BAcc:Q9LPI8]	None
AT1G32810	0.0498763	0.680003	0.862659	7.46006	468.667	7.84603	481.333	NA	Location of EST 206I21T7%2C gb [Source:UniProtKB/TrEMBL%3BAcc:Q9MAQ7]	None
AT1G32850	-0.695558	0.544469	NA	0.0707763	3.33333	0.0439978	2	UBP11	Putative ubiquitin carboxyl-terminal hydrolase 11 [Source:UniProtKB/Swiss-Prot%3BAcc:Q9MAQ3]	None
AT1G32870	-0.240028	0.117857	0.341975	5.67646	205.667	4.87648	171	ANAC13	NAC domain protein 13 [Source:TAIR%3BAcc:AT1G32870]	None
AT1G32910	-0.397218	0.789254	NA	0.0986087	2.33333	0.0783375	1.66667	NA	HXXXD-type acyl-transferase family protein [Source:UniProtKB/TrEMBL%3BAcc:Q9MAP9]	None
AT1G32920	0.408205	0.00903181	0.0581181	73.9033	315	99.1067	417.333	NA	At1g32920/F9L11_25 [Source:UniProtKB/TrEMBL%3BAcc:Q93WI1]	None
AT1G32928	0.446886	0.145206	0.386725	8.06248	39.3333	11.0983	52.6667	NA	Avr9/Cf-9 rapidly elicited protein [Source:UniProtKB/TrEMBL%3BAcc:Q56XA0]	None
AT1G32940	0.45922	0.000576942	0.00691599	4.64938	209.333	6.46348	286.333	SBT3.5	Subtilisin-like protease SBT3.5 [Source:UniProtKB/Swiss-Prot%3BAcc:Q9MAP7]	None
AT1G32950	0.1621	0.708084	0.876047	0.481714	19.6667	0.520685	22.3333	SBT3.4	Subtilisin-like protease SBT3.4 [Source:UniProtKB/Swiss-Prot%3BAcc:F4HPF1]	None
AT1G32960	0.970552	0.0896949	0.289567	0.279661	12.3333	0.563957	23.6667	SBT3.3	Subtilisin-like protease SBT3.3 [Source:UniProtKB/Swiss-Prot%3BAcc:Q9MAP5]	None
AT1G32990	-0.282432	0.00022405	0.00324805	397.38	4415.33	329.402	3552	RPL11	50S ribosomal protein L11%2C chloroplastic [Source:UniProtKB/Swiss-Prot%3BAcc:Q9MAP3]	None
AT1G33040	-0.344665	7.05728e-05	0.00130539	87.5392	1308.33	70.9395	1014.67	NACA5	Nascent polypeptide-associated complex subunit alpha-like protein 5 [Source:UniProtKB/Swiss-Prot%3BAcc:Q8LGC6]	None
AT1G33080	0.269007	0.121206	0.347742	4.91324	121.333	5.95503	145.333	DTX23	Protein DETOXIFICATION 23 [Source:UniProtKB/Swiss-Prot%3BAcc:Q8RXK1]	None
AT1G33090	0.216186	0.675172	0.859492	0.404558	11.6667	0.472001	13.3333	DTX22	Protein DETOXIFICATION 22 [Source:UniProtKB/Swiss-Prot%3BAcc:F4HPH1]	None
AT1G33100	-0.0391221	0.954345	0.984337	0.374257	8.66667	0.367254	8.33333	DTX20	Protein DETOXIFICATION 20 [Source:UniProtKB/Swiss-Prot%3BAcc:F4HPH2]	None
AT1G33110	-0.393066	0.000129193	0.0021054	54.7964	1481.67	41.9521	1132.33	DTX21	Protein DETOXIFICATION [Source:UniProtKB/TrEMBL%3BAcc:A0A178WPH4]	None
AT1G33120	-0.199726	0.00578183	0.0415272	373.514	5305.67	333.008	4507.33	RPL9B	60S ribosomal protein L9-1 [Source:UniProtKB/Swiss-Prot%3BAcc:P49209]	None
AT1G33170	-0.508706	8.02611e-07	2.92342e-05	18.2648	715	13.0131	498	NA	Probable methyltransferase PMT18 [Source:UniProtKB/Swiss-Prot%3BAcc:Q9C884]	None
AT1G33220	-1.63615	0.663595	NA	0.0431137	0.666667	0	0	NA	Beta-1%2C3-glucanase%2C putative [Source:UniProtKB/TrEMBL%3BAcc:Q9LP27]	None
AT1G33230	-0.0513298	0.604442	0.819279	21.4472	494	20.8504	471	NA	TMPIT-like protein [Source:TAIR%3BAcc:AT1G33230]	None
AT1G33260	-0.40631	0.0639628	0.232753	4.24912	82.6667	3.2542	61.3333	NA	Probable receptor-like protein kinase At1g33260 [Source:UniProtKB/Swiss-Prot%3BAcc:P0DKI6]	None
AT1G33265	0.0244143	0.861639	0.949596	26.343	276	26.8045	273.667	FAX4	Protein FATTY ACID EXPORT 4%2C chloroplastic [Source:UniProtKB/Swiss-Prot%3BAcc:Q8LPG1]	None
AT1G33280	0.0814552	0.887502	0.961078	0.795299	11.3333	0.890672	11.3333	BRN1	NAC015 [Source:UniProtKB/TrEMBL%3BAcc:A0A178W4M7]	None
AT1G33290	0.0178464	0.835135	0.938944	36.3294	777	36.9301	774	NA	At1g33290 [Source:UniProtKB/TrEMBL%3BAcc:Q9C877]	None
AT1G33320	-1.63248	0.127799	NA	0.350499	6.33333	0.115111	2	CGS2	Probable cystathionine gamma-synthase 2 [Source:UniProtKB/Swiss-Prot%3BAcc:Q9C876]	None
AT1G33330	-0.211135	0.0828504	0.276238	22.2367	323.333	19.9617	275.333	NA	Class I peptide chain release factor [Source:UniProtKB/TrEMBL%3BAcc:Q9C875]	None
AT1G33360	0.0803423	0.464939	0.725241	9.5925	402.667	10.3147	417.333	CLPX3	CLP protease regulatory subunit CLPX3%2C mitochondrial [Source:UniProtKB/Swiss-Prot%3BAcc:Q66GN9]	None
AT1G33470	0.136387	0.0931853	0.296661	36.8522	1040.67	40.4346	1135.67	NA	RNA-binding (RRM/RBD/RNP motifs) family protein [Source:UniProtKB/TrEMBL%3BAcc:Q67YS0]	None
AT1G33500	1.18087	0.300172	NA	0.115636	1.66667	0.240695	4	NA	unknown protein%3B Ha. [Source:TAIR%3BAcc:AT1G33500]	None
AT1G33560	-0.130964	0.455494	0.718017	3.86207	189.333	3.62372	165.667	ADR1	Disease resistance protein ADR1 [Source:UniProtKB/Swiss-Prot%3BAcc:Q9FW44]	None
AT1G33590	0.126921	0.0858561	0.282454	103.111	2283	113.034	2441.67	NA	Leucine-rich repeat (LRR) family protein [Source:TAIR%3BAcc:AT1G33590]	None
AT1G33600	0.358001	0.456557	0.718918	8.39496	152.667	10.7121	209.333	NA	Leucine-rich repeat (LRR) family protein [Source:UniProtKB/TrEMBL%3BAcc:Q9FW48]	None
AT1G33610	0.307575	0.0413078	0.173877	8.01848	164.333	10.0165	198.333	NA	Leucine-rich repeat (LRR) family protein [Source:UniProtKB/TrEMBL%3BAcc:F4HR91]	None
AT1G33612	0.45728	0.252116	0.531101	0.944302	19.6667	1.29952	26.6667	NA	Leucine-rich repeat (LRR) family protein [Source:UniProtKB/TrEMBL%3BAcc:F4HR92]	None
AT1G33670	-0.447859	0.419874	0.690049	0.695435	14.6667	0.513291	10.3333	NA	Leucine-rich repeat (LRR) family protein [Source:UniProtKB/TrEMBL%3BAcc:Q4PT10]	None
AT1G33680	0.0500663	0.49758	0.749664	21.011	1209	21.796	1235.33	NA	KH domain-containing protein [Source:UniProtKB/TrEMBL%3BAcc:Q0WLY0]	None
AT1G33750	0.164109	0.558806	0.790693	1.91658	61.6667	2.13789	69.6667	TPS22	Terpenoid synthase 22 [Source:UniProtKB/Swiss-Prot%3BAcc:Q9LQ27]	None
AT1G33760	0.906624	0.448439	NA	0.173615	2	0.328794	3.66667	ERF022	Ethylene-responsive transcription factor ERF022 [Source:UniProtKB/Swiss-Prot%3BAcc:Q9LQ28]	None
AT1G33770	2.23862	0.0588684	NA	0.035711	1.33333	0.198312	5.66667	NA	Protein kinase superfamily protein [Source:UniProtKB/TrEMBL%3BAcc:Q9LQ29]	None
AT1G33790	-0.310218	0.0886394	0.287723	6.10166	288	5.01003	226	JAL4	Jacalin-related lectin 4 [Source:UniProtKB/Swiss-Prot%3BAcc:Q9LQ31]	None
AT1G33800	0.243027	0.123498	0.351071	13.1954	255	15.9445	289.667	GXM3	GXMT1 [Source:UniProtKB/TrEMBL%3BAcc:A0A178W7W0]	None
AT1G33810	-0.22878	0.0113784	0.0694314	198.738	1528.67	171.348	1266.33	NA	Zinc finger/BTB domain protein [Source:UniProtKB/TrEMBL%3BAcc:Q8L9M8]	None
AT1G33811	-0.304677	2.37983e-05	0.000527412	80.694	1878.33	65.6197	1485.67	NA	GDSL esterase/lipase At1g33811 [Source:UniProtKB/Swiss-Prot%3BAcc:Q8L5Z1]	None
AT1G33910	-0.534554	0.795354	NA	0.0936233	1.66667	0.069159	1	IAN5	Immune-associated nucleotide-binding protein 5 [Source:UniProtKB/Swiss-Prot%3BAcc:Q9C8U8]	None
AT1G33930	-0.757848	0.0227179	0.114461	2.40429	46.6667	1.46002	27.6667	IAN6	Immune-associated nucleotide-binding protein 6 [Source:UniProtKB/Swiss-Prot%3BAcc:Q9C8V0]	None
AT1G33980	0.0807798	0.328725	0.610859	29.9236	1161.33	32.0057	1216.67	ATUPF3	Smg-4/UPF3 family protein [Source:TAIR%3BAcc:AT1G33980]	None
AT1G33990	0.108395	0.301045	0.582661	21.5995	501.333	23.766	525	MES14	Putative methylesterase 14%2C chloroplastic [Source:UniProtKB/Swiss-Prot%3BAcc:Q9FVW3]	None
AT1G34020	-0.0465236	0.687379	0.864802	15.3351	317.667	14.978	301.667	URGT6	UDP-rhamnose/UDP-galactose transporter 6 [Source:UniProtKB/Swiss-Prot%3BAcc:Q9FDZ5]	None
AT1G34040	-0.00637792	0.983127	0.994863	2.31471	49.6667	2.34842	48.6667	TAR3	Tryptophan aminotransferase-related protein 3 [Source:UniProtKB/Swiss-Prot%3BAcc:Q9FE98]	None
AT1G34050	-2.65516	0.123181	NA	0.130896	4.33333	0.021511	0.666667	NA	Ankyrin repeat family protein [Source:UniProtKB/TrEMBL%3BAcc:Q9FX13]	None
AT1G34120	0.126686	0.418606	0.689315	4.28588	154.333	4.78142	164.667	IP5P1	Type I inositol polyphosphate 5-phosphatase 1 [Source:UniProtKB/Swiss-Prot%3BAcc:Q84MA2]	None
AT1G34130	-0.00707442	0.937931	0.9788	21.5077	794	21.5048	778.333	STT3B	Glycosyltransferase (Fragment) [Source:UniProtKB/TrEMBL%3BAcc:W8PVA0]	None
AT1G34150	-0.0599346	0.688215	0.86497	5.83456	180.333	5.6597	170.333	NA	tRNA pseudouridine synthase [Source:UniProtKB/TrEMBL%3BAcc:Q9C5K6]	None
AT1G34160	-0.0332324	0.921402	0.972832	1.04684	34.6667	1.04403	33.3333	PCMP-H68	Pentatricopeptide repeat-containing protein At1g34160 [Source:UniProtKB/Swiss-Prot%3BAcc:Q9FX24]	None
AT1G34180	0.304906	0.0462546	0.187398	5.79562	198.667	7.2549	239	anac016	NAC domain containing protein 16 [Source:TAIR%3BAcc:AT1G34180]	None
AT1G34190	0.138694	0.107377	0.323496	22.8266	844.667	25.3319	915	NAC017	NAC017 [Source:UniProtKB/TrEMBL%3BAcc:A0A178WNW4]	None
AT1G34200	-0.00335739	0.985596	0.995561	4.47608	104.667	4.48264	102.667	NA	At1g34200/F23M19.12 [Source:UniProtKB/TrEMBL%3BAcc:Q9ASQ9]	None
AT1G34210	-0.0820231	0.461852	0.72273	9.29059	375	8.84705	348.333	SERK2	Somatic embryogenesis receptor kinase 2 [Source:UniProtKB/Swiss-Prot%3BAcc:Q9XIC7]	None
AT1G34245	-0.322928	0.236109	0.511448	9.62219	72.3333	7.78325	56.3333	EPF2	EPF2 [Source:UniProtKB/TrEMBL%3BAcc:A0A178W2V8]	None
AT1G34260	0.0116488	0.914502	0.971331	6.02338	536.333	6.17094	532	FAB1D	Putative 1-phosphatidylinositol-3-phosphate 5-kinase FAB1D [Source:UniProtKB/Swiss-Prot%3BAcc:Q9XID0]	None
AT1G34300	0.266044	0.0374072	0.162567	5.40814	233.667	6.58326	276.667	NA	G-type lectin S-receptor-like serine/threonine-protein kinase At1g34300 [Source:UniProtKB/Swiss-Prot%3BAcc:Q9XID3]	None
AT1G34320	0.119239	0.171174	0.4251	18.2693	846	20.0177	907	NA	At1g34320 [Source:UniProtKB/TrEMBL%3BAcc:Q6NQ48]	None
AT1G34340	-0.0815348	0.624543	0.83161	7.2243	161.667	6.50548	152.667	NA	Alpha/beta-Hydrolases superfamily protein [Source:UniProtKB/TrEMBL%3BAcc:Q9XID7]	None
AT1G34350	-0.215733	0.185874	0.445417	16.9015	175.333	14.7152	147.667	NA	unknown protein%3B Ha. [Source:TAIR%3BAcc:AT1G34350]	None
AT1G34355	-0.313223	0.0723155	0.253017	2.12472	183.667	1.72125	147.667	PS1	FHA domain-containing protein PS1 [Source:UniProtKB/Swiss-Prot%3BAcc:B7SY83]	None
AT1G34360	-0.193262	0.194339	0.457279	6.05114	188.667	5.3268	162.333	IF3-1	Translation initiation factor IF3-1%2C mitochondrial [Source:UniProtKB/Swiss-Prot%3BAcc:Q6NLP2]	None
AT1G34370	0.255073	0.000726492	0.00829324	40.6803	1325.67	49.1936	1547	STOP1	Protein SENSITIVE TO PROTON RHIZOTOXICITY 1 [Source:UniProtKB/Swiss-Prot%3BAcc:Q9C8N5]	None
AT1G34420	0.321061	0.269248	0.550494	0.859615	37.6667	1.08549	46	NA	F12K21.25 [Source:UniProtKB/TrEMBL%3BAcc:Q9LNK3]	None
AT1G34460	-0.166811	0.700567	0.872307	0.670273	20	0.63818	17.3333	CYCB1%3B5	CYCLIN B1%3B5 [Source:TAIR%3BAcc:AT1G34460]	None
AT1G34470	0.171028	0.219334	0.491274	8.80731	197.333	9.92539	218.333	NA	Probable magnesium transporter NIPA3 [Source:UniProtKB/Swiss-Prot%3BAcc:Q9LNK7]	None
AT1G34480	-2.46944	0.0211615	NA	0.294877	7	0.0513859	1.33333	NA	Cysteine/Histidine-rich C1 domain family protein [Source:UniProtKB/TrEMBL%3BAcc:Q9LNK8]	None
AT1G34490	-1.34001	0.521465	NA	0.0857235	1	0.0346443	0.333333	NA	Putative long-chain-alcohol O-fatty-acyltransferase 10 [Source:UniProtKB/Swiss-Prot%3BAcc:Q3ED15]	None
AT1G34500	1.52299	0.604935	NA	0.0246116	0.333333	0.0955165	1	NA	Probable long-chain-alcohol O-fatty-acyltransferase 9 [Source:UniProtKB/Swiss-Prot%3BAcc:Q4PT07]	None
AT1G34520	-1.32841	0.413112	NA	0.243674	2.66667	0.0973409	1	NA	Probable long-chain-alcohol O-fatty-acyltransferase 8 [Source:UniProtKB/Swiss-Prot%3BAcc:Q9LNL1]	None
AT1G34540	0.0880266	0.857383	0.948445	0.678631	18	0.746611	18.3333	CYP94D1	CYP94D1 [Source:UniProtKB/TrEMBL%3BAcc:A0A178WEM5]	None
AT1G34580	0.293736	0.472767	0.731189	0.675131	21.6667	0.831899	26	STP5	Sugar transport protein 5 [Source:UniProtKB/Swiss-Prot%3BAcc:Q93Y91]	None
AT1G34630	0.23129	0.0724351	0.253342	10.0136	259.667	11.9231	298.667	NA	At1g34630/F12K21.3 [Source:UniProtKB/TrEMBL%3BAcc:Q8VZG0]	None
AT1G34650	0.958682	0.810265	NA	0	0	0.00977353	0.333333	HDG10	Homeobox-leucine zipper protein HDG10 [Source:UniProtKB/Swiss-Prot%3BAcc:Q9S9Z0]	None
AT1G34670	-0.0571955	0.818303	0.931042	4.4005	63.6667	4.27231	59.6667	AtMYB93	Transcription factor MYB93 [Source:UniProtKB/Swiss-Prot%3BAcc:Q9S9Z2]	None
AT1G34770	0.100805	0.712654	0.87817	4.62621	54.3333	4.94945	58.3333	NA	CONTAINS InterPro DOMAIN/s: MAGE protein (InterPro:IPR002190)%3B Ha. [Source:TAIR%3BAcc:AT1G34770]	None
AT1G35140	0.364717	0.14875	0.392789	2.86978	53.6667	3.71822	68	EXL1	Protein EXORDIUM-like 1 [Source:UniProtKB/Swiss-Prot%3BAcc:Q9C6E4]	None
AT1G35160	-0.042504	0.541411	0.779084	140.055	2281.67	137.856	2160.33	GF14 PHI	GF14 protein phi chain [Source:UniProtKB/TrEMBL%3BAcc:F4HWQ5]	None
AT1G35190	-0.0305233	0.778905	0.913642	21.2229	498.667	21.2052	477	NA	2-oxoglutarate (2OG) and Fe(II)-dependent oxygenase superfamily protein [Source:UniProtKB/TrEMBL%3BAcc:Q9C6F0]	None
AT1G35220	0.0794998	0.430786	0.699166	8.25137	494	8.73527	517.667	NA	unknown protein%3B FUNCTIONS IN: molecular_function unknown%3B INVOLVED IN: biological_process unknown%3B LOCATED IN: cellular_component unknown%3B EXPRESSED IN: 22 plant structures%3B EXPRESSED DURING: 13 growth stages%3B Ha. [Source:TAIR%3BAcc:AT1G35220]	None
AT1G35230	0.29554	0.660087	0.851887	1.63968	8	1.99398	9.33333	AGP5	Classical arabinogalactan protein 5 [Source:UniProtKB/Swiss-Prot%3BAcc:Q8LCE4]	None
AT1G35330	0.475683	0.421411	0.691007	0.662336	10.6667	0.956828	14.3333	NA	RING/U-box superfamily protein [Source:TAIR%3BAcc:AT1G35330]	None
AT1G35340	-0.0227278	0.790481	0.919086	46.8578	667	46.7253	645	NA	ATP-dependent protease La (LON) domain protein [Source:UniProtKB/TrEMBL%3BAcc:Q682J5]	None
AT1G35420	0.209611	0.0156531	0.0873136	63.5461	1295	74.531	1477.33	NA	Alpha/beta-Hydrolases superfamily protein [Source:UniProtKB/TrEMBL%3BAcc:F4HYC8]	None
AT1G35460	-0.439419	0.00151509	0.0149876	13.4593	274	10.1753	197.333	BHLH80	Transcription factor bHLH80 [Source:UniProtKB/Swiss-Prot%3BAcc:Q9C8P8]	None
AT1G35510	-0.0827202	0.393268	0.667895	14.347	553.667	13.6039	516	OFUT9	O-fucosyltransferase 9 [Source:UniProtKB/Swiss-Prot%3BAcc:Q8H1E6]	None
AT1G35515	0.130669	0.881762	NA	0.698346	6	0.80931	6	MYB8	Transcription factor MYB8 [Source:UniProtKB/Swiss-Prot%3BAcc:Q9SDS8]	None
AT1G35516	-0.179407	0.0958823	0.302526	76.624	739	69.0204	650	NA	myb-like transcription factor family protein [Source:TAIR%3BAcc:AT1G35516]	None
AT1G35530	-0.105667	0.647737	0.845487	0.870712	71	0.810488	65.6667	NA	DEAD/DEAH box RNA helicase family protein [Source:UniProtKB/TrEMBL%3BAcc:F4HYE4]	None
AT1G35617	-0.00310747	0.999366	NA	0.305639	0.333333	0.254867	0.333333	NA	unknown protein%3B Ha. [Source:TAIR%3BAcc:AT1G35617]	None
AT1G35620	0.13032	0.134473	0.369542	25.1903	639.667	28.1851	685	PDIL5-2	Protein disulfide-isomerase 5-2 [Source:UniProtKB/Swiss-Prot%3BAcc:Q94F09]	None
AT1G35660	0.263162	0.0540127	0.208292	2.50378	195.667	3.02025	232.667	NA	unknown protein%3B FUNCTIONS IN: molecular_function unknown%3B INVOLVED IN: biological_process unknown%3B LOCATED IN: plasma membrane%3B EXPRESSED IN: 19 plant structures%3B EXPRESSED DURING: 11 growth stages%3B Ha. [Source:TAIR%3BAcc:AT1G35660]	None
AT1G35670	-0.0126481	0.915417	0.971344	15.7449	473	16.0188	455.333	CPK11	Calcium-dependent protein kinase 11 [Source:UniProtKB/Swiss-Prot%3BAcc:Q39016]	None
AT1G35680	-0.271217	0.000202546	0.00298668	527.089	5977	440.923	4861	RPL21	50S ribosomal protein L21%2C chloroplastic [Source:UniProtKB/Swiss-Prot%3BAcc:P51412]	None
AT1G35710	0.330373	0.177535	0.434578	1.109	60	1.39837	75	NA	Probable leucine-rich repeat receptor-like protein kinase At1g35710 [Source:UniProtKB/Swiss-Prot%3BAcc:Q9LP24]	None
AT1G35720	0.276253	0.00636638	0.0443769	179.061	3391	221.892	3978.33	ANN1	Annexin [Source:UniProtKB/TrEMBL%3BAcc:A0A178WGZ8]	None
AT1G36050	0.0480577	0.576025	0.80227	29.9016	822	31.1551	837.333	NA	Endoplasmic reticulum vesicle transporter protein [Source:UniProtKB/TrEMBL%3BAcc:F4I1K2]	None
AT1G36160	0.0696307	0.452477	0.715785	38.9559	5857	41.3056	6060.67	ACC1	Acetyl-CoA carboxylase 1 [Source:UniProtKB/Swiss-Prot%3BAcc:Q38970]	None
AT1G36180	0.701776	6.26424e-06	0.000172838	1.47454	193	2.40115	314.667	ACC2	Acetyl-CoA carboxylase 2 [Source:UniProtKB/Swiss-Prot%3BAcc:F4I1L3]	None
AT1G36280	-0.275134	0.0164963	0.0907587	12.2317	346	10.2417	280.667	NA	Adenylosuccinate lyase [Source:UniProtKB/TrEMBL%3BAcc:Q8GUN7]	None
AT1G36310	-0.307262	0.00246962	0.0220945	22.4131	527.667	18.3951	422	TRM9	tRNA (carboxymethyluridine(34)-5-O)-methyltransferase [Source:UniProtKB/Swiss-Prot%3BAcc:Q94A09]	None
AT1G36320	-0.17222	0.0188506	0.100084	62.1421	1440.67	56.2278	1251	NA	At1g36320/F7F23_4 [Source:UniProtKB/TrEMBL%3BAcc:Q9C8X8]	None
AT1G36380	0.217341	0.187899	0.447997	24.2452	138	28.4221	158.667	NA	unknown protein%3B LOCATED IN: endomembrane system%3B EXPRESSED IN: 23 plant structures%3B EXPRESSED DURING: 15 growth stages%3B Ha. [Source:TAIR%3BAcc:AT1G36380]	None
AT1G36675	0.993161	0.601239	NA	8.12333e-08	0.666667	0.0400833	1.33333	NA	Glycine-rich protein [Source:UniProtKB/TrEMBL%3BAcc:F4I389]	None
AT1G36922	0.958682	0.810201	NA	0	0	0.0890017	0.333333	NA	unknown protein. [Source:TAIR%3BAcc:AT1G36922]	None
AT1G36940	0.194462	0.440205	0.7075	4.49882	58	5.2028	65.6667	NA	unknown protein%3B Ha. [Source:TAIR%3BAcc:AT1G36940]	None
AT1G36980	0.0274433	0.744067	0.895024	171.3	1405.67	174.406	1405.67	NA	Transmembrane 50A-like protein [Source:UniProtKB/TrEMBL%3BAcc:Q949Z8]	None
AT1G37113	1.83349	0.649934	NA	0	0	0.0389843	0.666667	NA	unknown protein%3B LOCATED IN: chloroplast%3B Ha. [Source:TAIR%3BAcc:AT1G37113]	None
AT1G37130	0.00729625	0.917097	0.97175	680.731	43029.7	688.671	42790.3	NIA2	Nitrate reductase [NADH] 2 [Source:UniProtKB/Swiss-Prot%3BAcc:P11035]	None
AT1G42430	0.023004	0.834856	0.938741	14.4738	510.667	14.8886	510.333	NA	unknown protein%3B BEST Arabidopsis thaliana protein match is: unknown protein (TAIR:AT3G55760.3)%3B Ha. [Source:TAIR%3BAcc:AT1G42430]	None
AT1G42470	0.183638	0.132155	0.366117	7.85327	510.667	8.96549	579	NA	Patched family protein [Source:TAIR%3BAcc:AT1G42470]	None
AT1G42480	-0.162157	0.180318	0.439157	28.3585	375.667	25.8955	330	NA	TLR4 regulator/MIR-interacting MSAP protein [Source:UniProtKB/TrEMBL%3BAcc:Q680L3]	None
AT1G42540	0.0891411	0.381015	0.660463	10.8098	541.333	11.6417	567	GLR3.3	Glutamate receptor 3.3 [Source:UniProtKB/Swiss-Prot%3BAcc:Q9C8E7]	None
AT1G42550	-0.204769	0.00166601	0.0162257	52.215	3665.67	46.4206	3151.33	PMI1	Protein PLASTID MOVEMENT IMPAIRED 1 [Source:UniProtKB/Swiss-Prot%3BAcc:Q9C8E6]	None
AT1G42960	-0.0485987	0.456598	0.718918	254.851	2251	245.941	2129.67	NA	Inner membrane localized protein [Source:UniProtKB/TrEMBL%3BAcc:Q9C7S3]	None
AT1G42970	-0.413821	6.00157e-13	8.10383e-11	1414.13	43990.3	1070.63	32590.7	GAPB	Glyceraldehyde-3-phosphate dehydrogenase GAPB%2C chloroplastic [Source:UniProtKB/Swiss-Prot%3BAcc:P25857]	None
AT1G43000	-1.66745	0.536216	NA	0.0852223	0.666667	0	0	NA	PLATZ transcription factor family protein [Source:TAIR%3BAcc:AT1G43000]	None
AT1G43010	1.66985	0.359642	NA	0.0592859	0.666667	0.208452	2	NA	Putative pentatricopeptide repeat-containing protein At1g43010 [Source:UniProtKB/Swiss-Prot%3BAcc:Q9C545]	None
AT1G43020	0.246102	0.300667	0.582329	2.97288	68	3.59092	80	NA	Putative uncharacterized protein [Source:UniProtKB/TrEMBL%3BAcc:Q6E2A4]	None
AT1G43040	1.83631	0.492737	NA	0	0	0.37305	0.666667	NA	SAUR-like auxin-responsive protein family [Source:TAIR%3BAcc:AT1G43040]	None
AT1G43160	0.698545	0.00212973	0.0197161	5.42837	92	9.02718	143.333	RAP2-6	Ethylene-responsive transcription factor RAP2-6 [Source:UniProtKB/Swiss-Prot%3BAcc:Q7G1L2]	None
AT1G43170	-0.130353	0.072097	0.252524	415.464	10599.7	385.454	9472.33	ARP1	60S ribosomal protein L3-1 [Source:UniProtKB/Swiss-Prot%3BAcc:P17094]	None
AT1G43171	0	1	NA	0	0	0	0	NA	B3 domain-containing protein At1g43171 [Source:UniProtKB/Swiss-Prot%3BAcc:Q1G3Z6]	None
AT1G43670	0.0245896	0.702611	0.873309	110.853	2617.33	114.673	2617.67	CYFBP	Fructose-1%2C6-bisphosphatase%2C cytosolic [Source:UniProtKB/Swiss-Prot%3BAcc:Q9MA79]	None
AT1G43690	-0.0457835	0.543058	0.78006	27.2917	1177.33	26.7073	1119.67	NA	At1g43690/F2J6_4 [Source:UniProtKB/TrEMBL%3BAcc:Q8VYV0]	None
AT1G43700	0.074701	0.390809	0.666099	34.7611	738.333	37.1964	764.667	VIP1	Transcription factor VIP1 [Source:UniProtKB/Swiss-Prot%3BAcc:Q9MA75]	None
AT1G43770	0.966076	0.069744	0.247038	0.330455	9.33333	0.669984	18	NA	RING/FYVE/PHD zinc finger superfamily protein [Source:UniProtKB/TrEMBL%3BAcc:B3H578]	None
AT1G43790	-0.106479	0.600906	0.817031	40.9346	202.667	38.93	176.667	TED6	At1g43790 [Source:UniProtKB/TrEMBL%3BAcc:Q8LBX7]	None
AT1G43850	-0.140825	0.0588823	0.219419	19.5493	1326.33	17.8565	1188.67	SEU	Transcriptional corepressor SEUSS [Source:UniProtKB/Swiss-Prot%3BAcc:Q8W234]	None
AT1G43890	0.112192	0.20148	0.467565	61.465	841.333	67.1394	886.333	RABC1	Ras-related protein RABC1 [Source:UniProtKB/Swiss-Prot%3BAcc:O23657]	None
AT1G43900	-0.0795399	0.427613	0.696479	30.2121	526	28.8835	492	NA	Probable protein phosphatase 2C 11 [Source:UniProtKB/Swiss-Prot%3BAcc:Q8VZN9]	None
AT1G44050	0.285284	0.72152	NA	0.138163	5.66667	0.180859	6.33333	NA	Cysteine/Histidine-rich C1 domain family protein [Source:UniProtKB/TrEMBL%3BAcc:Q9LNZ0]	None
AT1G44120	0.200165	0.298864	0.580246	1.20756	128.667	1.38671	148.667	NA	Armadillo/beta-catenin-like repeat %3B C2 calcium/lipid-binding domain (CaLB) protein [Source:TAIR%3BAcc:AT1G44120]	None
AT1G44160	0.275691	0.170798	0.424502	3.46585	88	4.31021	104.333	NA	HSP40/DnaJ peptide-binding protein [Source:UniProtKB/TrEMBL%3BAcc:Q0WRX5]	None
AT1G44318	-0.092941	0.932742	NA	0.15942	3.33333	0.153733	3	HEMB2	Probable delta-aminolevulinic acid dehydratase 2%2C chloroplastic [Source:UniProtKB/Swiss-Prot%3BAcc:Q94LA4]	None
AT1G44414	1.09833	0.479083	NA	0.480373	1	1.10245	2	NA	At1g44414 [Source:UniProtKB/TrEMBL%3BAcc:Q94LA6]	None
AT1G44575	-0.532522	3.63999e-20	1.46405e-17	1476.95	20953	1027.34	14289.7	PSBS	Photosystem II 22 kDa protein%2C chloroplastic [Source:UniProtKB/Swiss-Prot%3BAcc:Q9XF91]	None
AT1G44740	-2.20622	0.582385	NA	0.0491233	0.666667	0	0	NA	unknown protein%3B FUNCTIONS IN: molecular_function unknown%3B INVOLVED IN: biological_process unknown%3B LOCATED IN: mitochondrion%3B EXPRESSED IN: embryo%2C leaf whorl%2C flower%2C seed%3B EXPRESSED DURING: F mature embryo stage%2C petal differentiation and expansi /.../ge%2C E expanded cotyledon stage%2C D bilateral stage%3B Ha. [Source:TAIR%3BAcc:AT1G44740]	None
AT1G44750	0.166566	0.037747	0.163588	35.0154	849.667	39.5868	942.333	PUP11	Probable purine permease 11 [Source:UniProtKB/Swiss-Prot%3BAcc:Q9LPF6]	None
AT1G44780	-0.179939	0.362827	0.643453	3.57918	125	3.24615	109.333	NA	Translation initiation factor [Source:UniProtKB/TrEMBL%3BAcc:Q5Q0F0]	None
AT1G44810	-0.312045	0.0297611	0.138164	11.6465	235.667	9.67821	185	NA	Probable transcription factor At1g44810 [Source:UniProtKB/Swiss-Prot%3BAcc:Q9LPF0]	None
AT1G44820	0.107408	0.311537	0.59279	18.0114	447.333	19.6235	471.333	NA	At1g44820 [Source:UniProtKB/TrEMBL%3BAcc:Q9LPE9]	None
AT1G44830	-0.769999	0.0723105	0.253017	3.55836	27.3333	2.12429	15.3333	ERF014	Ethylene-responsive transcription factor ERF014 [Source:UniProtKB/Swiss-Prot%3BAcc:Q9LPE8]	None
AT1G44835	0.0238807	0.838088	0.940431	16.1975	300	16.636	299.333	NA	YbaK/aminoacyl-tRNA synthetase-associated domain-containing protein [Source:UniProtKB/TrEMBL%3BAcc:F4HPK3]	None
AT1G44890	0.338175	0.426885	0.695795	1.35406	17.3333	1.76565	21	NA	At1g44890 [Source:UniProtKB/TrEMBL%3BAcc:Q6ICW9]	None
AT1G44900	-0.246799	0.0469446	0.189734	5.8165	317.333	4.98963	261.667	MCM2	DNA replication licensing factor MCM2 [Source:UniProtKB/Swiss-Prot%3BAcc:Q9LPD9]	None
AT1G44910	0.0230221	0.801562	0.923665	10.1335	667.333	10.5201	666.667	PRP40A	Pre-mRNA-processing protein 40A [Source:UniProtKB/Swiss-Prot%3BAcc:B6EUA9]	None
AT1G44960	0.0334448	0.817014	0.930636	12.1386	198	12.513	198.667	NA	SNARE associated Golgi protein family [Source:UniProtKB/TrEMBL%3BAcc:Q9LPD5]	None
AT1G44970	0.773572	0.000196865	0.00292804	4.19571	79.6667	7.35371	131.333	PER9	Peroxidase 9 [Source:UniProtKB/Swiss-Prot%3BAcc:Q96512]	None
AT1G45000	0.00700148	0.918776	0.972166	57.0638	1639.33	58.1508	1611.67	RPT4B	26S proteasome regulatory subunit S10B homolog B [Source:UniProtKB/Swiss-Prot%3BAcc:Q9MAK9]	None
AT1G45015	0.843919	0.309656	NA	0.60729	4.66667	1.04587	8	NA	At1g45015 [Source:UniProtKB/TrEMBL%3BAcc:Q9MAK7]	None
AT1G45050	0.148449	0.339677	0.621463	15.6509	156.333	17.3385	169	UBC15	Ubiquitin-conjugating enzyme 15 [Source:UniProtKB/Swiss-Prot%3BAcc:P42743]	None
AT1G45110	-0.0509593	0.840118	0.940913	3.01148	71	2.91913	67	NA	At1g45110 [Source:UniProtKB/TrEMBL%3BAcc:Q6NQA0]	None
AT1G45130	0.117012	0.191535	0.453601	19.2172	926.667	21.0986	984	BGAL5	Beta-galactosidase 5 [Source:UniProtKB/Swiss-Prot%3BAcc:Q9MAJ7]	None
AT1G45180	-0.206442	0.290829	0.572777	2.56495	108.667	2.23663	92.3333	NA	F27F5.26 [Source:UniProtKB/TrEMBL%3BAcc:Q9MAJ1]	None
AT1G45191	0.0572129	0.8679	0.953107	1.09362	30	1.12188	30.6667	BGLU1	Glycosyl hydrolase superfamily protein [Source:TAIR%3BAcc:AT1G45191]	None
AT1G45201	-0.277236	0.00238789	0.0215058	114.837	2727	96.553	2208.33	ATTLL1	triacylglycerol lipase-like 1 [Source:TAIR%3BAcc:AT1G45201]	None
AT1G45243	-0.832693	0.597758	NA	0.258882	2.33333	0.14163	1.33333	NA	Cysteine/Histidine-rich C1 domain family protein [Source:UniProtKB/TrEMBL%3BAcc:F4HRB9]	None
AT1G45233	-0.195356	0.280122	0.562647	4.98851	154	4.80356	134	THO5A	THO complex subunit 5A [Source:UniProtKB/Swiss-Prot%3BAcc:F4HRC1]	None
AT1G45474	-0.279523	4.93155e-05	0.000980294	137.01	1867.33	113.846	1512	LHCA5	Photosystem I chlorophyll a/b-binding protein 5%2C chloroplastic [Source:UniProtKB/Swiss-Prot%3BAcc:Q9C639]	None
AT1G45688	-0.073054	0.270884	0.552108	93.5542	1893.67	90.1289	1766	NA	Transmembrane protein [Source:UniProtKB/TrEMBL%3BAcc:Q9C636]	None
AT1G45976	0.278273	0.0177815	0.0961503	17.5322	292.667	21.678	348.333	SBP1	SBP1 [Source:UniProtKB/TrEMBL%3BAcc:A0A178WK23]	None
AT1G46264	0.0686987	0.799092	0.922619	4.59003	72	4.87422	73.6667	HSFB4	Heat stress transcription factor B-4 [Source:UniProtKB/Swiss-Prot%3BAcc:Q9C635]	None
AT1G47210	0.233428	0.0979094	0.306393	11.1516	242.333	13.5128	276.667	CYCA3-2	Cyclin-A3-2 [Source:UniProtKB/Swiss-Prot%3BAcc:Q9C6A9]	None
AT1G47230	-0.140254	0.323263	0.604807	8.41554	211	7.73097	187.667	CYCA3-4	Cyclin-A3-4 [Source:UniProtKB/Swiss-Prot%3BAcc:Q3ECW2]	None
AT1G47250	-0.421835	0.00272789	0.0238361	14.6061	229.667	11.1926	166.667	PAF2	Proteasome subunit alpha type-1-B [Source:UniProtKB/Swiss-Prot%3BAcc:O23712]	None
AT1G47265	1.52228	0.621111	NA	0.053057	0.333333	0.127695	1	NA	Putative uncharacterized protein [Source:UniProtKB/TrEMBL%3BAcc:Q1G3Z4]	None
AT1G47270	0.314455	0.138076	0.375083	3.02039	85.3333	3.796	103.667	TULP6	Tubby-like F-box protein 6 [Source:UniProtKB/Swiss-Prot%3BAcc:Q0WPY0]	None
AT1G47271	-0.210412	0.76345	0.905028	0.822657	7	0.704036	6	NA	Cystathionine beta-synthase (CBS) family protein [Source:UniProtKB/TrEMBL%3BAcc:B3H6Z2]	None
AT1G47278	-0.0473874	0.747899	0.896758	33.3408	199.333	32.7957	188.333	NA	Putative uncharacterized protein [Source:UniProtKB/TrEMBL%3BAcc:Q1G3Z3]	None
AT1G47290	0.0786393	0.509185	0.759091	10.7828	277.667	11.4545	289.667	3BETAHSD/D1	3beta-hydroxysteroid-dehydrogenase/decarboxylase isoform 1 [Source:UniProtKB/Swiss-Prot%3BAcc:Q9FX01]	None
AT1G47310	0.197316	0.0623515	0.228828	17.1749	392.667	19.9787	440	NA	At1g47310 [Source:UniProtKB/TrEMBL%3BAcc:Q9FX03]	None
AT1G47330	0.0921652	0.454518	0.717513	8.41205	254.333	9.06426	267.333	CBSDUF7	DUF21 domain-containing protein At1g47330 [Source:UniProtKB/Swiss-Prot%3BAcc:Q8RY60]	None
AT1G47410	0.13681	0.475677	0.733229	7.74161	98.3333	8.72813	106.667	NA	At1g47410 [Source:UniProtKB/TrEMBL%3BAcc:Q9SX76]	None
AT1G47480	0.0329367	0.843606	0.941964	10.5689	209.333	11.0035	208	CXE2	Probable carboxylesterase 2 [Source:UniProtKB/Swiss-Prot%3BAcc:Q9SX78]	None
AT1G47485	-2.39601	0.261997	NA	0.26674	1.66667	0.048584	0.333333	CEP1	Precursor of CEP1 [Source:UniProtKB/Swiss-Prot%3BAcc:Q8L8Y3]	None
AT1G47490	-0.168699	0.0290716	0.13583	37.2893	1187.33	33.1969	1038	RBP47C	Polyadenylate-binding protein RBP47C [Source:UniProtKB/Swiss-Prot%3BAcc:Q9SX79]	None
AT1G47500	-0.304622	0.000249704	0.00355221	27.6079	833.333	22.3845	665	RBP47C'	Polyadenylate-binding protein RBP47C' [Source:UniProtKB/Swiss-Prot%3BAcc:Q9SX80]	None
AT1G47530	-0.0937925	0.191648	0.453772	61.0343	2082.33	57.5907	1920.33	DTX33	Protein DETOXIFICATION 33 [Source:UniProtKB/Swiss-Prot%3BAcc:Q9SX83]	None
AT1G47550	0.0458208	0.568417	0.797502	21.7802	1224.67	22.5094	1249.67	SEC3A	Exocyst complex component sec3A [Source:UniProtKB/TrEMBL%3BAcc:F4HTA1]	None
AT1G47560	0.498897	0.0266471	0.127666	0.975945	58.3333	1.3943	82	SEC3B	Exocyst complex component SEC3B [Source:UniProtKB/Swiss-Prot%3BAcc:Q9SX86]	None
AT1G47570	0.00163876	0.990396	0.997095	8.71503	295	8.69613	295.333	NA	At1g47570 [Source:UniProtKB/TrEMBL%3BAcc:Q6NL06]	None
AT1G47578	0.0180589	0.879957	0.957443	21.7377	350	22.6458	347.333	LIP2P2	Octanoyltransferase LIP2p2%2C chloroplastic [Source:UniProtKB/Swiss-Prot%3BAcc:P0C7R2]	None
AT1G47600	0.43313	0.290567	0.572533	6.50665	199.667	8.99955	257.333	TGG4	Myrosinase 4 [Source:UniProtKB/Swiss-Prot%3BAcc:Q8GRX1]	None
AT1G47610	0.181346	0.854048	NA	0.175163	3.66667	0.195103	4.33333	NA	F16N3.9 protein [Source:UniProtKB/TrEMBL%3BAcc:Q9SX94]	None
AT1G47655	0.905471	0.0249817	0.121872	1.29094	17.3333	2.46345	31.3333	DOF1.6	Dof zinc finger protein DOF1.6 [Source:UniProtKB/Swiss-Prot%3BAcc:Q9SX97]	None
AT1G47710	0.268711	0.00503343	0.0375353	24.3811	511.333	29.7664	602.333	NA	Serine protease inhibitor (SERPIN) family protein [Source:TAIR%3BAcc:AT1G47710]	None
AT1G47740	0.0976591	0.300358	0.581938	39.3247	856.333	42.6985	902.667	NA	PPPDE putative thiol peptidase family protein [Source:UniProtKB/TrEMBL%3BAcc:Q8RXP3]	None
AT1G47760	1.20927	0.249496	NA	0.469386	3	1.10219	6.66667	AGL102	AGAMOUS-like 102 [Source:UniProtKB/TrEMBL%3BAcc:Q9FZF2]	None
AT1G47780	1.89576	0.525299	NA	0	0	0.235704	0.666667	NA	alpha/beta-Hydrolases superfamily protein [Source:TAIR%3BAcc:AT1G47780]	None
AT1G47786	-0.333301	0.48796	0.742433	1.94691	26.3333	1.53121	20.3333	NA	Alpha/beta-Hydrolases superfamily protein [Source:UniProtKB/TrEMBL%3BAcc:F4HV37]	None
AT1G47820	0.0123797	0.949761	0.983154	20.2435	97.6667	20.6821	98	NA	T2E6.7 [Source:UniProtKB/TrEMBL%3BAcc:Q9FZG2]	None
AT1G47870	-0.0339016	0.810543	0.927757	8.4284	218.333	8.29325	211	E2FC	E2FC [Source:UniProtKB/TrEMBL%3BAcc:A0A178WB46]	None
AT1G47890	0.293434	0.714229	NA	0.12848	5.33333	0.161264	6.33333	AtRLP7	AT1G47890	None
AT1G47915	-0.674817	0.85661	NA	1.77195	0.666667	1.10065	0.333333	NA	Putative F-box protein At1g47915 [Source:UniProtKB/Swiss-Prot%3BAcc:Q3E6X9]	None
AT1G47920	-0.578019	0.661041	NA	0.134523	2	0.0894673	1.33333	NA	RNI-like superfamily protein [Source:UniProtKB/TrEMBL%3BAcc:F4HV53]	None
AT1G47970	-0.195311	0.0490493	0.195288	28.95	565.667	26.1925	485	NA	At1g47970 [Source:UniProtKB/TrEMBL%3BAcc:Q9C7Y9]	None
AT1G47990	0.93832	0.440455	NA	0.158782	2	0.309677	3.66667	GA2OX4	Gibberellin 2-beta-dioxygenase 4 [Source:UniProtKB/Swiss-Prot%3BAcc:Q9C7Z1]	None
AT1G48050	0.218105	0.0516677	0.202388	8.02491	323	9.46015	370.667	KU80	ATP-dependent DNA helicase 2 subunit KU80 [Source:UniProtKB/Swiss-Prot%3BAcc:Q9FQ09]	None
AT1G48060	3.14158	0.200938	NA	0	0	0.12282	1.66667	NA	F-box and associated interaction domains-containing protein [Source:TAIR%3BAcc:AT1G48060]	None
AT1G48100	0.0989268	0.630308	0.834992	2.85045	88.6667	3.0967	92.6667	NA	Polygalacturonase At1g48100 [Source:UniProtKB/Swiss-Prot%3BAcc:Q949Z1]	None
AT1G48140	-0.0217941	0.898104	0.964597	20.5849	157.333	20.4902	151.333	DPMS3	DPMS3 [Source:UniProtKB/TrEMBL%3BAcc:A0A178WDH1]	None
AT1G48150	-0.964896	0.813073	NA	0.030389	0.333333	0	0	NA	F21D18.12 [Source:UniProtKB/TrEMBL%3BAcc:Q9LNG8]	None
AT1G48170	0.193998	0.11402	0.334869	18.0037	269	21.6936	301.333	NA	Proteasome assembly chaperone [Source:UniProtKB/TrEMBL%3BAcc:Q8VYQ0]	None
AT1G48195	-2.19722	0.399099	NA	0.198766	1	0	0	NA	Zinc finger CCCH domain-containing protein 13 [Source:UniProtKB/Swiss-Prot%3BAcc:Q3ECU8]	None
AT1G48210	-0.0804653	0.387972	0.66391	27.1021	635.333	25.795	589.333	NA	Protein kinase superfamily protein [Source:UniProtKB/TrEMBL%3BAcc:F4HWU0]	None
AT1G48230	-0.0910777	0.341568	0.622962	22.6592	599	20.9506	557	NA	Probable sugar phosphate/phosphate translocator At1g48230 [Source:UniProtKB/Swiss-Prot%3BAcc:Q9LNH5]	None
AT1G48280	0.0216537	0.862526	0.950242	7.89381	272.333	8.08964	273.333	NA	F11A17.16 [Source:UniProtKB/TrEMBL%3BAcc:Q9SX62]	None
AT1G48300	-0.116803	0.121292	0.347937	130.471	2780	122.962	2553	NA	unknown protein%3B FUNCTIONS IN: molecular_function unknown%3B INVOLVED IN: biological_process unknown%3B LOCATED IN: endomembrane system%3B EXPRESSED IN: 24 plant structures%3B EXPRESSED DURING: 15 growth stages%3B Ha. [Source:TAIR%3BAcc:AT1G48300]	None
AT1G48325	1.86546	0.0211535	NA	0.667421	3.33333	2.58756	11.6667	NA	At1g48325 [Source:UniProtKB/TrEMBL%3BAcc:Q84WL4]	None
AT1G48330	-0.584817	0.0205192	0.106127	13.8884	82.6667	9.52585	53.3333	NA	At1g48330 [Source:UniProtKB/TrEMBL%3BAcc:Q9SX67]	None
AT1G48350	-0.299397	0.00215344	0.0198792	516.758	5201.33	427.587	4127.33	RPL18	Uncharacterized protein At1g48350 [Source:UniProtKB/TrEMBL%3BAcc:Q0WWC5]	None
AT1G48360	0.0646298	0.697807	0.870716	3.91962	206	4.0974	215.667	FAN1	Fanconi-associated nuclease 1 homolog [Source:UniProtKB/Swiss-Prot%3BAcc:Q5XVJ4]	None
AT1G48370	-0.208681	0.204452	0.471576	4.87453	178	4.22382	153.667	YSL8	Probable metal-nicotianamine transporter YSL8 [Source:UniProtKB/Swiss-Prot%3BAcc:Q6R3K4]	None
AT1G48440	-0.0301632	0.735917	0.890849	117.811	945	116.865	899.667	NA	At1g48440 [Source:UniProtKB/TrEMBL%3BAcc:Q8LDS7]	None
AT1G48460	-0.446717	0.000450178	0.00566843	22.6408	368.667	16.6089	269	NA	At1g48460 [Source:UniProtKB/TrEMBL%3BAcc:Q5PNY9]	None
AT1G48470	0.172752	0.780714	0.914689	0.400218	9	0.442894	10.3333	GLN1-5	Glutamine synthetase cytosolic isozyme 1-5 [Source:UniProtKB/Swiss-Prot%3BAcc:Q8GXW5]	None
AT1G48480	-0.229052	0.00134097	0.0135996	41.7093	1667.33	36.1252	1401.67	RKL1	Probable inactive receptor kinase At1g48480 [Source:UniProtKB/Swiss-Prot%3BAcc:Q9LP77]	None
AT1G48500	0.611004	0.00984367	0.0619439	2.99639	52.3333	4.61647	78.3333	TIFY6A	Protein TIFY 6A [Source:UniProtKB/Swiss-Prot%3BAcc:Q58G47]	None
AT1G48510	-0.636955	0.135877	0.371591	1.2625	27.3333	0.821212	17.6667	NA	Surfeit locus 1 cytochrome c oxidase biogenesis protein [Source:TAIR%3BAcc:AT1G48510]	None
AT1G48520	-0.220543	0.0110797	0.0680036	32.2008	1109.33	28.289	940.667	GATB	Glutamyl-tRNA(Gln) amidotransferase subunit B%2C chloroplastic/mitochondrial [Source:UniProtKB/Swiss-Prot%3BAcc:Q9FV81]	None
AT1G48540	0.053002	0.588462	0.809192	11.0816	635.333	11.684	653.333	NA	Outer arm dynein light chain 1 protein [Source:UniProtKB/TrEMBL%3BAcc:F4HYH4]	None
AT1G48560	0.0683205	0.77524	0.911896	1.7884	68	1.90787	69.6667	NA	unknown protein%3B Ha. [Source:TAIR%3BAcc:AT1G48560]	None
AT1G48598	-0.0669017	0.312803	0.594473	105.006	3591.67	101.829	3396.67	NA	NA	None
AT1G48635	-0.154457	0.218523	0.490089	14.0393	315.667	12.8	277	PEX3	Peroxin 3 [Source:UniProtKB/TrEMBL%3BAcc:F4HYJ3]	None
AT1G48640	-0.116606	0.864762	0.951319	0.490262	10	0.455903	9	NA	Lysine histidine transporter-like 1 [Source:UniProtKB/Swiss-Prot%3BAcc:Q9C733]	None
AT1G48720	-1.79989	0.515636	NA	1.02603	1.33333	0.260332	0.333333	NA	At1g48720 [Source:UniProtKB/TrEMBL%3BAcc:Q682G3]	None
AT1G48745	-0.977358	8.46062e-05	0.00151842	12.4818	108.333	6.43382	54	NA	Putative uncharacterized protein [Source:UniProtKB/TrEMBL%3BAcc:Q1G3E1]	None
AT1G48770	-0.11181	0.490344	0.744077	7.40001	159.667	6.47657	144.667	NA	Uncharacterized protein F11I4_6 [Source:UniProtKB/TrEMBL%3BAcc:Q9C745]	None
AT1G48800	0.581806	0.130652	0.363158	0.678088	20.6667	1.02941	30.3333	TPS28	Terpenoid synthase 28 [Source:UniProtKB/Swiss-Prot%3BAcc:Q9C748]	None
AT1G48820	1.02538	0.584098	NA	0.0474233	1	0.0903237	2.33333	NA	Terpene cyclase%2C putative [Source:UniProtKB/TrEMBL%3BAcc:Q9C749]	None
AT1G48840	0.15744	0.197636	0.461964	10.3512	402.667	11.6749	445	NA	Heat-inducible transcription repressor (DUF639) [Source:UniProtKB/TrEMBL%3BAcc:Q8VXZ2]	None
AT1G48880	-0.152604	0.513748	0.762413	2.6311	69.3333	2.36101	62.3333	TBL7	Protein trichome berefringence-like 7 [Source:UniProtKB/Swiss-Prot%3BAcc:F4I037]	None
AT1G48920	-0.35496	2.25822e-07	9.61474e-06	169.263	6499.33	135.292	5015.67	NUCL1	Nucleolin 1 [Source:UniProtKB/Swiss-Prot%3BAcc:Q9FVQ1]	None
AT1G48950	-0.0274146	0.799277	0.922664	9.32209	368	9.19574	357	NA	C3HC zinc finger-like protein [Source:UniProtKB/TrEMBL%3BAcc:F4I045]	None
AT1G48960	-0.342451	0.0128122	0.0757354	15.9982	240	12.8308	184.667	NA	Adenine nucleotide alpha hydrolases-like superfamily protein [Source:UniProtKB/TrEMBL%3BAcc:Q67Y32]	None
AT1G49010	-0.24256	0.0365118	0.159699	20.757	430.333	18.0373	354.667	NA	At1g49010 [Source:UniProtKB/TrEMBL%3BAcc:Q9M9A3]	None
AT1G49030	0.526713	0.302798	0.584091	1.00521	13.3333	1.49633	18.3333	PCR6	Protein PLANT CADMIUM RESISTANCE 6 [Source:UniProtKB/Swiss-Prot%3BAcc:Q9M9A5]	None
AT1G49032	0.557817	5.14138e-05	0.00101137	29.5475	214.333	43.8694	308.667	NA	Putative uncharacterized protein [Source:UniProtKB/TrEMBL%3BAcc:Q8GX22]	None
AT1G49050	0.393133	0.00747005	0.0497057	8.46454	273	11.2872	347.667	APCB1	Aspartyl protease APCB1 [Source:UniProtKB/Swiss-Prot%3BAcc:Q9M9A8]	None
AT1G49110	1.83224	0.650167	NA	0	0	0.0517631	0.666667	NA	Putative uncharacterized protein [Source:UniProtKB/TrEMBL%3BAcc:Q5Q0E7]	None
AT1G49120	-1.91705	0.6347	NA	5e-09	0.666667	0	0	ERF117	Ethylene-responsive transcription factor ERF117 [Source:UniProtKB/Swiss-Prot%3BAcc:Q9M9B2]	None
AT1G49150	1.69536	0.237411	NA	0.312211	1	0.876636	3.66667	NA	unknown protein%3B Ha. [Source:TAIR%3BAcc:AT1G49150]	None
AT1G49200	-0.485084	0.000145229	0.00229934	36.2217	390.333	25.7639	279.333	ATL75	RING-H2 finger protein ATL75 [Source:UniProtKB/Swiss-Prot%3BAcc:Q94BY6]	None
AT1G49210	-0.700781	0.154498	0.401295	1.88831	18.6667	1.19351	11	ATL76	E3 ubiquitin-protein ligase ATL76 [Source:UniProtKB/Swiss-Prot%3BAcc:Q6NML0]	None
AT1G49220	0.103408	0.92862	NA	0.27285	2.33333	0.306889	2.33333	ATL10	RING-H2 finger protein ATL10 [Source:UniProtKB/Swiss-Prot%3BAcc:P0C034]	None
AT1G49230	-0.714468	0.0021914	0.0201196	9.32781	95.3333	5.65203	57.3333	ATL78	RING-H2 finger protein ATL78 [Source:UniProtKB/Swiss-Prot%3BAcc:Q6NQG7]	None
AT1G49240	0.403668	3.26483e-09	2.2281e-07	267.859	7383.33	357.478	9546.33	ACT8	Actin-8 [Source:UniProtKB/Swiss-Prot%3BAcc:Q96293]	None
AT1G49245	-0.43657	0.0300367	0.138966	20.418	107.667	15.3516	78	NA	At1g49245 [Source:UniProtKB/TrEMBL%3BAcc:Q8LD83]	None
AT1G49300	0.23251	0.00461672	0.0351488	50.7703	793.333	60.6467	916	RABG3E	Ras-related protein RABG3e [Source:UniProtKB/Swiss-Prot%3BAcc:Q9XI98]	None
AT1G49320	0.465681	0.0350231	0.155542	4.94397	78	6.85687	107	USPL1	BURP domain protein USPL1 [Source:UniProtKB/Swiss-Prot%3BAcc:Q9XI99]	None
AT1G49330	1.62877	0.364253	NA	0.047037	0.666667	0.148369	2	NA	F13F21.24 protein [Source:UniProtKB/TrEMBL%3BAcc:Q9XIA0]	None
AT1G49340	0.0619097	0.555006	0.788445	14.2267	1851.33	14.9479	1908.67	PI4KA1	Phosphatidylinositol 4-kinase alpha 1 [Source:UniProtKB/Swiss-Prot%3BAcc:Q9SXA1]	None
AT1G49350	0.20309	0.171951	0.426119	7.16126	162.667	8.26234	184.333	NA	PfkB-like carbohydrate kinase family protein [Source:UniProtKB/TrEMBL%3BAcc:Q94AT3]	None
AT1G49380	-0.363738	1.19589e-05	0.000295132	27.3974	963.667	21.52	737	CCS1	Cytochrome c biogenesis protein CCS1%2C chloroplastic [Source:UniProtKB/Swiss-Prot%3BAcc:Q9XIA4]	None
AT1G49390	0.0783614	0.852176	0.946115	1.13214	21.3333	1.20754	22	NA	2-oxoglutarate (2OG) and Fe(II)-dependent oxygenase superfamily protein [Source:UniProtKB/TrEMBL%3BAcc:Q9XIA5]	None
AT1G49400	-0.137914	0.292306	0.574103	28.3688	256.667	25.9379	228	emb1129	Nucleic acid-binding%2C OB-fold-like protein [Source:UniProtKB/TrEMBL%3BAcc:Q9XIA6]	None
AT1G49430	-0.00238103	0.9776	0.993223	29.6166	1169.67	29.9134	1142	LACS2	Long chain acyl-CoA synthetase 2 [Source:UniProtKB/Swiss-Prot%3BAcc:Q9XIA9]	None
AT1G49450	0.860211	0.0104054	0.0647476	0.774653	28.3333	1.44656	50	NA	F13F21.11 protein [Source:UniProtKB/TrEMBL%3BAcc:Q9XIB2]	None
AT1G49470	0.547874	1.03556e-06	3.60519e-05	26.2442	300.333	38.3169	430	NA	At1g49470 [Source:UniProtKB/TrEMBL%3BAcc:Q9XIB3]	None
AT1G49475	0.419247	0.414658	0.68604	1.26274	14	1.62184	19	NA	B3 domain-containing protein At1g49475 [Source:UniProtKB/Swiss-Prot%3BAcc:Q9XIB4]	None
AT1G49510	-0.370143	0.0342017	0.153036	9.90932	147.667	7.68046	113	emb1273	At1g49510 [Source:UniProtKB/TrEMBL%3BAcc:Q9XIB8]	None
AT1G49520	0.0444709	0.810314	0.927757	3.27208	105.667	3.4454	106.667	NA	At1g49520 [Source:UniProtKB/TrEMBL%3BAcc:Q501B9]	None
AT1G49560	-0.113389	0.578179	0.803786	4.49974	106.333	4.18844	98.6667	HHO6	Transcription factor HHO6 [Source:UniProtKB/Swiss-Prot%3BAcc:Q9FX84]	None
AT1G49580	0.0417511	0.622352	0.830784	21.0098	838.333	21.8778	849.333	CRK8	CDPK-related kinase 8 [Source:UniProtKB/Swiss-Prot%3BAcc:Q9FX86]	None
AT1G49590	-0.120332	0.368122	0.648355	13.4996	267.667	12.621	241	ZOP1	Zinc finger protein ZOP1 [Source:UniProtKB/Swiss-Prot%3BAcc:Q7XA66]	None
AT1G49720	0.360407	0.00221394	0.0202773	10.2831	342.667	13.3559	432.667	ABF1	Abscisic acid responsive element-binding factor 1 [Source:UniProtKB/TrEMBL%3BAcc:F4I3C9]	None
AT1G49740	-0.137396	0.23131	0.505495	13.8247	392.667	12.6242	351.333	NA	F14J22.5 protein [Source:UniProtKB/TrEMBL%3BAcc:Q9FXA0]	None
AT1G49760	-0.167219	0.0293939	0.136829	70.6304	3215.67	63.3184	2813.67	PAB8	Polyadenylate-binding protein 8 [Source:UniProtKB/Swiss-Prot%3BAcc:Q9FXA2]	None
AT1G49820	0.0864916	0.425744	0.694695	17.512	408	18.8631	426	MTK	Methylthioribose kinase [Source:UniProtKB/Swiss-Prot%3BAcc:Q9C6D2]	None
AT1G49840	0.0585445	0.678019	0.861317	7.40488	225.333	7.77338	233	NA	Glutamyl-tRNA (Gln) amidotransferase subunit A (DUF620) [Source:UniProtKB/TrEMBL%3BAcc:Q9C6D0]	None
AT1G49860	0.825295	1.03895e-08	6.29497e-07	14.205	190.333	25.655	329.667	GSTF14	Glutathione S-transferase F14 [Source:UniProtKB/Swiss-Prot%3BAcc:Q9C6C8]	None
AT1G49870	-0.376281	0.0341211	0.153031	2.22339	134.667	1.74597	101.667	NA	Myosin-2 heavy chain-like protein [Source:UniProtKB/TrEMBL%3BAcc:Q9C6C7]	None
AT1G49880	-0.11579	0.663599	0.853669	5.3405	58.3333	4.96425	52.6667	ERV1	FAD-linked sulfhydryl oxidase ERV1 [Source:UniProtKB/Swiss-Prot%3BAcc:Q8GXX0]	None
AT1G49890	-0.234557	0.0778784	0.265839	11.136	435.667	9.43182	375	QWRF2	QWRF motif-containing protein 2 [Source:UniProtKB/Swiss-Prot%3BAcc:Q94AI1]	None
AT1G49910	-0.304744	0.215054	0.486201	2.84999	63.6667	2.32422	51	BUB3.2	BUB3.2 [Source:UniProtKB/TrEMBL%3BAcc:A0A178W7L6]	None
AT1G49960	0.159143	0.357986	0.638861	5.38768	141.667	5.98172	157.667	NAT4	Nucleobase-ascorbate transporter 4 [Source:UniProtKB/Swiss-Prot%3BAcc:P93039]	None
AT1G49975	-0.344188	0.00232732	0.0210707	64.2882	430.667	51.5481	330.333	NA	At1g49975 [Source:UniProtKB/TrEMBL%3BAcc:Q8LFL5]	None
AT1G49980	0.0179059	0.840133	0.940913	11.881	594.667	12.1971	592.333	POLK	DNA polymerase kappa [Source:UniProtKB/Swiss-Prot%3BAcc:Q6JDV7]	None
AT1G49990	0.198221	0.481127	0.737531	2.03463	43.6667	2.3455	50	NA	F-box protein At1g49990 [Source:UniProtKB/Swiss-Prot%3BAcc:Q9LPM2]	None
AT1G50010	0.0834524	0.270949	0.55218	266.791	7398.33	283.969	7746	TUBA4	Tubulin alpha-2 chain [Source:UniProtKB/Swiss-Prot%3BAcc:B9DGT7]	None
AT1G50040	0.253586	0.347481	0.629423	2.64746	63.6667	3.18722	75	NA	F2J10.8 protein [Source:UniProtKB/TrEMBL%3BAcc:Q9LPM5]	None
AT1G50060	0.274537	0.403176	0.676452	9.34208	72.3333	11.3238	82	NA	CAP (Cysteine-rich secretory proteins%2C Antigen 5%2C and Pathogenesis-related 1 protein) superfamily protein [Source:UniProtKB/TrEMBL%3BAcc:Q9LPM7]	None
AT1G50120	0.0187192	0.877025	0.955964	8.7401	278.333	8.75999	277.667	NA	FUNCTIONS IN: molecular_function unknown%3B INVOLVED IN: biological_process unknown%3B LOCATED IN: cellular_component unknown%3B EXPRESSED IN: 23 plant structures%3B EXPRESSED DURING: 13 growth stages%3B CONTAINS InterPro DOMAIN/s: Rgp1 (InterPro:IPR014848)%2C /.../globulin E-set (InterPro:IPR014756)%3B Ha. [Source:TAIR%3BAcc:AT1G50120]	None
AT1G50170	-0.0257929	0.822586	0.93261	28.8186	421.667	28.5132	405	SIRB	Sirohydrochlorin ferrochelatase%2C chloroplastic [Source:UniProtKB/Swiss-Prot%3BAcc:Q84JH7]	None
AT1G50180	-0.0194693	0.922711	0.973039	2.13972	115	2.14456	112.667	NA	Putative disease resistance protein At1g50180 [Source:UniProtKB/Swiss-Prot%3BAcc:Q9SX38]	None
AT1G50240	0.0376999	0.795817	0.921118	3.79124	270.667	3.86347	277	TIO	Serine/threonine-protein kinase TIO [Source:UniProtKB/Swiss-Prot%3BAcc:Q2QAV0]	None
AT1G50270	-0.039157	0.86389	0.951117	1.81151	68	1.77091	65.6667	PCMP-E42	Pentatricopeptide repeat-containing protein At1g50270 [Source:UniProtKB/Swiss-Prot%3BAcc:Q9SX45]	None
AT1G50310	-0.403905	0.637967	NA	0.196643	5	0.151074	3.66667	STP9	STP9 [Source:UniProtKB/TrEMBL%3BAcc:A0A178WN25]	None
AT1G50360	0.204722	0.0436313	0.180089	6.82317	562.667	7.96723	639.333	VIII-A	Myosin-3 [Source:UniProtKB/Swiss-Prot%3BAcc:F4I507]	None
AT1G50370	-0.0287999	0.755683	0.900975	29.6233	667	29.222	642.333	FYPP1	Phytochrome-associated serine/threonine-protein phosphatase 1 [Source:UniProtKB/Swiss-Prot%3BAcc:Q9SX52]	None
AT1G50380	-0.0389838	0.687126	0.86471	12.0427	596.333	11.8735	566.333	NA	Prolyl oligopeptidase family protein [Source:TAIR%3BAcc:AT1G50380]	None
AT1G50400	-0.0819138	0.838835	0.940431	1.52526	24.6667	1.45029	22.6667	TOM40-2	Probable mitochondrial import receptor subunit TOM40-2 [Source:UniProtKB/Swiss-Prot%3BAcc:Q9SX55]	None
AT1G50410	0.135807	0.186268	0.445944	8.55944	511.333	9.49455	555	CHR28	Helicase-like transcription factor CHR28 [Source:UniProtKB/Swiss-Prot%3BAcc:Q94BR5]	None
AT1G50440	0.0148487	0.905209	0.967061	17.0808	306	17.4296	303	NA	At1g50440 [Source:UniProtKB/TrEMBL%3BAcc:Q9LPR9]	None
AT1G50460	0.0550197	0.606684	0.820644	11.116	462.667	11.6907	474.333	HKL1	Hexokinase-3 [Source:UniProtKB/Swiss-Prot%3BAcc:Q9LPS1]	None
AT1G50480	0.293491	0.000113358	0.00188803	95.6579	4000.67	118.447	4754.67	THFS	Formate--tetrahydrofolate ligase [Source:UniProtKB/Swiss-Prot%3BAcc:Q9SPK5]	None
AT1G50510	0.0665264	0.549183	0.785188	12.3822	385	12.5634	395.333	NA	Indigoidine synthase A family protein [Source:UniProtKB/TrEMBL%3BAcc:Q84K35]	None
AT1G50580	-0.0708076	0.902736	0.965734	0.57829	10	0.558402	9.33333	UGT79B5	UDP-glycosyltransferase 79B5 [Source:UniProtKB/Swiss-Prot%3BAcc:Q9LPS8]	None
AT1G50610	-2.33097	0.428166	NA	0.0233461	1	0	0	PRK5	Pollen receptor-like kinase 5 [Source:UniProtKB/Swiss-Prot%3BAcc:Q9LPT1]	None
AT1G50620	0.0715723	0.527141	0.771828	6.96217	305.333	7.33807	316.333	NA	RING/FYVE/PHD zinc finger superfamily protein [Source:UniProtKB/TrEMBL%3BAcc:Q9C6P8]	None
AT1G50660	-0.0916129	0.254511	0.533519	22.6263	1249.33	21.4073	1157.67	NA	Actin cytoskeleton-regulatory complex pan-like protein [Source:UniProtKB/TrEMBL%3BAcc:Q9LPT5]	None
AT1G50700	-0.199259	0.296604	0.578697	3.08305	116	2.71741	100	CPK33	calcium-dependent protein kinase 33 [Source:TAIR%3BAcc:AT1G50700]	None
AT1G50730	0.238539	0.0484321	0.193524	6.95356	363.667	8.32336	418.333	NA	unknown protein%3B Ha. [Source:TAIR%3BAcc:AT1G50730]	None
AT1G50732	-0.456967	0.0111143	0.0681937	24.8762	143.667	18.3553	102.333	NA	unknown protein. [Source:TAIR%3BAcc:AT1G50732]	None
AT1G50740	0.242005	0.135717	0.371361	18.1733	164.667	21.7246	189	FAX5	Protein FATTY ACID EXPORT 5 [Source:UniProtKB/Swiss-Prot%3BAcc:Q9C6T7]	None
AT1G50840	-0.344834	0.000266565	0.00373824	14.7892	1060	11.7757	832.333	POLGAMMA2	polymerase gamma 2 [Source:TAIR%3BAcc:AT1G50840]	None
AT1G50870	0	1	NA	0	0	0	0	NA	Putative F-box protein At1g50870 [Source:UniProtKB/Swiss-Prot%3BAcc:Q9C6J3]	None
AT1G50900	-0.195177	0.00986611	0.0620456	147.569	1436	129.643	1227.33	LTD	Protein LHCP TRANSLOCATION DEFECT [Source:UniProtKB/Swiss-Prot%3BAcc:Q8VY88]	None
AT1G50920	-0.206729	0.00145224	0.0144948	68.924	2932	60.6137	2512	NA	Nucleolar GTP-binding protein 1 [Source:UniProtKB/Swiss-Prot%3BAcc:Q9C6I8]	None
AT1G50930	-0.0886269	0.925935	NA	0.42693	4.66667	0.427984	4.33333	VUP2	Vascular-related unknown protein 2 [Source:UniProtKB/Swiss-Prot%3BAcc:Q9C6I7]	None
AT1G50950	0.0627441	0.775333	0.911896	3.3115	93.6667	3.42561	97	NA	Thioredoxin protein with domain of unknown function (DUF1692) [Source:TAIR%3BAcc:AT1G50950]	None
AT1G50970	0.216101	0.318308	0.600409	4.34734	86.6667	4.53524	100.667	NA	Vacuolar protein sorting-associated protein 53 B [Source:UniProtKB/Swiss-Prot%3BAcc:F4I7Y2]	None
AT1G51060	-0.246939	0.0018569	0.017693	209.746	2132	179.611	1755	HTA10	Probable histone H2A.1 [Source:UniProtKB/Swiss-Prot%3BAcc:Q9C681]	None
AT1G51070	0.0912608	0.207685	0.47635	112.137	1702	121.016	1768	bHLH115	Basic helix-loop-helix (BHLH) DNA-binding superfamily protein [Source:UniProtKB/TrEMBL%3BAcc:F4I7Z3]	None
AT1G51090	0.831013	0.275752	NA	0.429088	4.66667	0.77706	8	NA	Heavy metal transport/detoxification superfamily protein [Source:UniProtKB/TrEMBL%3BAcc:Q9C684]	None
AT1G51100	-0.244781	0.0494161	0.196376	33.2466	378.333	28.5681	314	NA	CRR41 [Source:UniProtKB/TrEMBL%3BAcc:A0A178W725]	None
AT1G51110	-0.164656	0.0598838	0.222013	64.5796	1437	58.4698	1268.33	PAP12	Probable plastid-lipid-associated protein 12%2C chloroplastic [Source:UniProtKB/Swiss-Prot%3BAcc:Q8LAP6]	None
AT1G51160	0.0657067	0.475604	0.733229	60.9116	582.667	64.0086	598.667	NA	At1g51160 [Source:UniProtKB/TrEMBL%3BAcc:Q9SYB8]	None
AT1G51190	-0.24569	0.685211	0.86404	0.313218	11.6667	0.268944	9.66667	PLT2	AP2-like ethylene-responsive transcription factor PLT2 [Source:UniProtKB/Swiss-Prot%3BAcc:Q5YGP7]	None
AT1G51200	0.0345846	0.603281	0.818401	339.606	4964	348.902	5008.33	SAP2	Zinc finger A20 and AN1 domain-containing stress-associated protein 2 [Source:UniProtKB/Swiss-Prot%3BAcc:Q8H0X0]	None
AT1G51270	-1.90966	0.295208	NA	0.073321	2.66667	0.0158706	0.666667	NA	Vesicle-associated protein 1-4 [Source:UniProtKB/TrEMBL%3BAcc:F4I818]	None
AT1G51340	0.30592	0.00742163	0.0494705	11.481	335.333	14.5367	409.333	DTX42	Protein DETOXIFICATION [Source:UniProtKB/TrEMBL%3BAcc:A0A178W9H8]	None
AT1G51350	-0.0487747	0.593778	0.812566	15.0421	567.667	14.6183	540	NA	ARM repeat superfamily protein [Source:UniProtKB/TrEMBL%3BAcc:Q8RWE7]	None
AT1G51355	-0.0495654	0.91529	0.971344	2.30976	20	2.27159	18.6667	SMR9	Cyclin-dependent protein kinase inhibitor SMR9 [Source:UniProtKB/Swiss-Prot%3BAcc:Q3ECS5]	None
AT1G51360	0.263516	0.0395171	0.168668	18.2727	243	20.4394	289.333	DABB1	Stress-response A/B barrel domain-containing protein DABB1 [Source:UniProtKB/Swiss-Prot%3BAcc:Q9SYD8]	None
AT1G51380	-0.518027	0.0471233	0.190039	2.86548	62.6667	1.99217	43.6667	RH34	DEAD-box ATP-dependent RNA helicase 34 [Source:UniProtKB/Swiss-Prot%3BAcc:Q9C8J1]	None
AT1G51390	-0.557479	9.81237e-20	3.55391e-17	1248.24	5813	838.508	3880	NIFU5	NifU-like protein 5%2C mitochondrial [Source:UniProtKB/Swiss-Prot%3BAcc:Q9C8J2]	None
AT1G51405	-0.145854	0.482794	0.738695	2.51148	90.6667	2.36281	80.3333	NA	Myosin-like protein [Source:UniProtKB/TrEMBL%3BAcc:F4I9I6]	None
AT1G51430	0.188669	0.129862	0.361766	31.3677	352.333	35.7399	398	NA	unknown protein%3B BEST Arabidopsis thaliana protein match is: unknown protein (TAIR:AT3G28370.1)%3B Ha. [Source:TAIR%3BAcc:AT1G51430]	None
AT1G51440	-0.374997	0.418956	0.68945	0.806538	21	0.619333	16.6667	NA	Phospholipase A1-Igamma3%2C chloroplastic [Source:UniProtKB/Swiss-Prot%3BAcc:Q9C8J6]	None
AT1G51450	0.0633093	0.714227	0.878989	4.19258	157.667	4.46581	161.667	TRO	Protein TRAUCO [Source:UniProtKB/Swiss-Prot%3BAcc:Q9C8J7]	None
AT1G51470	0.509946	0.230678	0.504891	15.6554	476	22.7983	640.667	TGG5	Myrosinase 5 [Source:UniProtKB/Swiss-Prot%3BAcc:Q3ECS3]	None
AT1G51520	-0.383317	0.434699	0.702655	0.506037	17	0.394101	12.6667	NA	RNA-binding (RRM/RBD/RNP motifs) family protein [Source:UniProtKB/TrEMBL%3BAcc:F4I9J8]	None
AT1G51530	0.178118	0.912314	NA	0.0675894	1.66667	0.0599215	1.66667	NA	RNA-binding (RRM/RBD/RNP motifs) family protein [Source:UniProtKB/TrEMBL%3BAcc:F4I9K0]	None
AT1G51538	-0.287773	0.374929	0.654426	1.33191	43.3333	1.11378	34.3333	NA	Aminotransferase-like%2C plant mobile domain family protein [Source:UniProtKB/TrEMBL%3BAcc:F4I9K2]	None
AT1G51540	0.0683549	0.595086	0.813376	9.95325	275	10.5059	285.667	NA	At1g51540 [Source:UniProtKB/TrEMBL%3BAcc:Q84VX7]	None
AT1G51580	0.0734746	0.50667	0.757041	10.299	373.667	10.8724	391	NA	At1g51580 [Source:UniProtKB/TrEMBL%3BAcc:Q9C553]	None
AT1G51600	-0.0956708	0.49235	0.745546	11.1859	292	10.5684	270	GATA28	GATA transcription factor 28 [Source:UniProtKB/Swiss-Prot%3BAcc:Q8H1G0]	None
AT1G51610	0.137547	0.217523	0.488699	13.3724	394.667	14.7637	428	MTPC4	Metal tolerance protein C4 [Source:UniProtKB/Swiss-Prot%3BAcc:Q8H1G3]	None
AT1G51620	0.226357	0.56421	0.794002	0.98166	23.3333	1.19916	26.3333	NA	Protein kinase superfamily protein [Source:UniProtKB/TrEMBL%3BAcc:Q9C8H4]	None
AT1G51650	0.074107	0.377977	0.6574	364.845	2892.67	393.457	2951	NA	ATP synthase subunit epsilon%2C mitochondrial [Source:UniProtKB/Swiss-Prot%3BAcc:Q96253]	None
AT1G51660	-0.0481766	0.752707	0.899261	10.9527	246.333	10.6411	236	MKK4	MKK4 [Source:UniProtKB/TrEMBL%3BAcc:A0A178WCC0]	None
AT1G51670	1.30798	0.44037	NA	0.0589261	1	0.154069	2.33333	HTT5	Protein HEAT-INDUCED TAS1 TARGET 5 [Source:UniProtKB/Swiss-Prot%3BAcc:Q8RY97]	None
AT1G51690	0.0242205	0.764748	0.905928	24.9134	963	25.6874	969.667	ATB ALPHA	protein phosphatase 2A 55 kDa regulatory subunit B alpha isoform [Source:TAIR%3BAcc:AT1G51690]	None
AT1G51700	0.128825	0.407641	0.680731	11.3993	201.667	12.5013	220.667	DOF1.7	Dof zinc finger protein DOF1.7 [Source:UniProtKB/Swiss-Prot%3BAcc:O82155]	None
AT1G51720	0.0710945	0.479882	0.736637	11.8023	558.667	12.5645	580.333	NA	Amino acid dehydrogenase family protein [Source:UniProtKB/TrEMBL%3BAcc:F4I9M9]	None
AT1G51740	0.117764	0.482054	0.738234	8.3722	162	9.26984	170.333	SYP81	Syntaxin-81 [Source:UniProtKB/Swiss-Prot%3BAcc:P59277]	None
AT1G51745	-0.293163	0.0267505	0.127922	6.82854	307.333	5.64465	249.333	NA	Tudor/PWWP/MBT superfamily protein [Source:TAIR%3BAcc:AT1G51745]	None
AT1G51760	0.360707	0.000142561	0.00226659	20.935	598	27.2188	755	ILL4	JR3 [Source:UniProtKB/TrEMBL%3BAcc:A0A178W8I8]	None
AT1G51770	-0.14581	0.8932	NA	0.173668	3.66667	0.178434	3.33333	NA	Core-2/I-branching beta-1%2C6-N-acetylglucosaminyltransferase family protein [Source:UniProtKB/TrEMBL%3BAcc:Q1G300]	None
AT1G51800	0.332541	0.280457	0.563058	7.12937	360	9.1474	427	IOS1	LRR receptor-like serine/threonine-protein kinase IOS1 [Source:UniProtKB/Swiss-Prot%3BAcc:Q9C8I6]	None
AT1G51913	-1.67064	0.302118	NA	1.22678	2.33333	0.405503	0.666667	NA	Putative uncharacterized protein [Source:UniProtKB/TrEMBL%3BAcc:Q1G3Z2]	None
AT1G51915	-0.964899	0.768622	NA	0.137681	0.333333	0	0	NA	Cryptdin protein-like protein [Source:UniProtKB/TrEMBL%3BAcc:Q8L9S8]	None
AT1G51920	3.44172	0.133809	NA	0	0	4.76431	2	NA	unknown protein%3B FUNCTIONS IN: molecular_function unknown%3B INVOLVED IN: biological_process unknown%3B LOCATED IN: endomembrane system%3B EXPRESSED IN: stem%2C stamen%3B EXPRESSED DURING: 4 anthesis%3B Ha. [Source:TAIR%3BAcc:AT1G51920]	None
AT1G51950	-0.0901876	0.308056	0.588826	33.3584	652.333	33.2189	601	IAA18	Auxin-responsive protein IAA18 [Source:UniProtKB/Swiss-Prot%3BAcc:O24408]	None
AT1G51960	-3.42542	0.0469574	NA	0.106131	2	0	0	IQD27	Calmodulin-binding family protein [Source:UniProtKB/TrEMBL%3BAcc:Q9ZU28]	None
AT1G51990	0.559024	0.379365	0.659026	0.406615	8.33333	0.642449	12.3333	NA	F5F19.5 protein [Source:UniProtKB/TrEMBL%3BAcc:Q9ZU24]	None
AT1G52080	-0.134033	0.581393	0.80571	1.918	71	1.78428	64	AR791	Actin binding protein family [Source:UniProtKB/TrEMBL%3BAcc:Q9SAU9]	None
AT1G52155	-0.0821062	0.709321	0.876674	5.24383	80.6667	4.99264	74	NA	unknown protein%3B Ha. [Source:TAIR%3BAcc:AT1G52155]	None
AT1G52190	0.352683	8.05813e-05	0.00146162	39.4886	1290	50.6586	1616.33	NPF1.2	Protein NRT1/ PTR FAMILY 1.2 [Source:UniProtKB/Swiss-Prot%3BAcc:Q9M817]	None
AT1G52230	-0.293786	2.05494e-06	6.51788e-05	1816.52	13596.3	1493.6	10903.7	PSAH2	Photosystem I reaction center subunit VI-2%2C chloroplastic [Source:UniProtKB/Swiss-Prot%3BAcc:Q9SUI6]	None
AT1G52260	0.0470616	0.899986	0.965162	1.06798	29.6667	1.12858	30	PDIL1-5	Protein disulfide isomerase-like 1-5 [Source:UniProtKB/Swiss-Prot%3BAcc:A3KPF5]	None
AT1G52310	0.112056	0.284322	0.56643	13.45	405.667	14.643	433	NA	C-type lectin receptor-like tyrosine-protein kinase At1g52310 [Source:UniProtKB/Swiss-Prot%3BAcc:Q9C823]	None
AT1G52315	0.460704	0.411023	0.682595	0.608076	10.3333	0.894297	13.3333	NA	Regulator of Vps4 activity in the MVB pathway protein [Source:UniProtKB/TrEMBL%3BAcc:F4ICV8]	None
AT1G52320	0.148594	0.195595	0.458694	10.0623	393.333	11.3404	425	NA	BZIP protein%2C putative%3B 48652-45869 [Source:UniProtKB/TrEMBL%3BAcc:Q9C824]	None
AT1G52330	0.0906885	0.787878	0.918078	4.19261	31	4.34331	32.3333	NA	Expressed protein [Source:UniProtKB/TrEMBL%3BAcc:Q5BPW9]	None
AT1G52360	0.00276381	0.971051	0.991024	29.8744	2076.67	30.3356	2054.33	NA	Coatomer subunit beta' [Source:UniProtKB/TrEMBL%3BAcc:F4ICX0]	None
AT1G52370	-0.171539	0.0328954	0.149006	33.9615	987.333	29.076	866.667	NA	AT1G52370 protein [Source:UniProtKB/TrEMBL%3BAcc:Q56W16]	None
AT1G52400	-0.216174	0.318459	0.600513	20.8678	753.667	18.2124	635	BGLU18	Beta-D-glucopyranosyl abscisate beta-glucosidase [Source:UniProtKB/Swiss-Prot%3BAcc:Q9SE50]	None
AT1G52410	0.136383	0.383726	0.661642	4.87087	217.667	5.54279	236	TSA1	TSK-associating protein 1 [Source:UniProtKB/Swiss-Prot%3BAcc:F4ICX9]	None
AT1G52415	0.958685	0.751153	NA	0	0	0.0441163	0.333333	NA	Bifunctional inhibitor/lipid-transfer protein/seed storage 2S albumin superfamily protein [Source:UniProtKB/TrEMBL%3BAcc:Q3ECR8]	None
AT1G52420	0.278396	0.00144809	0.0144763	17.2068	855.667	21.3015	1015	NA	At1g52420 [Source:UniProtKB/TrEMBL%3BAcc:Q9SSP6]	None
AT1G52500	-0.180233	0.166737	0.419147	8.42964	267.667	7.61705	232.667	FPG1	Formamidopyrimidine-DNA glycosylase [Source:UniProtKB/Swiss-Prot%3BAcc:O80358]	None
AT1G52520	-0.266308	0.134795	0.370103	2.94561	128.333	2.48563	105	FRS6	Protein FAR1-RELATED SEQUENCE 6 [Source:UniProtKB/Swiss-Prot%3BAcc:Q9SSQ4]	None
AT1G52530	-0.302499	0.546019	0.782841	1.1613	16.3333	0.946664	13	NA	Hus1 protein [Source:UniProtKB/TrEMBL%3BAcc:Q709F6]	None
AT1G52580	-1.19011	0.5209	NA	0.0845266	1.66667	0.046102	0.666667	RBL5	RHOMBOID-like protein 5 [Source:UniProtKB/Swiss-Prot%3BAcc:Q9SSR0]	None
AT1G52600	0.013057	0.89682	0.964197	39.3074	493.333	40.0337	487	NA	Signal peptidase I [Source:UniProtKB/TrEMBL%3BAcc:Q9SSR2]	None
AT1G52618	-1.32993	0.459051	NA	0.309787	1.66667	0.125231	0.666667	NA	Putative uncharacterized protein [Source:UniProtKB/TrEMBL%3BAcc:Q1G3D9]	None
AT1G52620	0.139293	0.536986	0.776738	1.83247	78.6667	2.01694	86	NA	Pentatricopeptide repeat-containing protein At1g52620 [Source:UniProtKB/Swiss-Prot%3BAcc:Q9SSR4]	None
AT1G52650	0.0478844	0.926944	0.974968	0.512822	13	0.537065	13	NA	F-box/LRR-repeat protein At1g52650 [Source:UniProtKB/Swiss-Prot%3BAcc:Q9SSR7]	None
AT1G52660	-0.271631	0.46712	0.726825	1.24135	30	1.07136	24	NA	P-loop containing nucleoside triphosphate hydrolases superfamily protein [Source:TAIR%3BAcc:AT1G52660]	None
AT1G52690	0.404533	0.288508	0.570538	1.50475	23.6667	1.95954	30.6667	LEA7	Late embryogenesis abundant protein 7 [Source:UniProtKB/Swiss-Prot%3BAcc:Q96270]	None
AT1G52720	-0.112271	0.444747	0.710807	36.6554	281.333	34.0017	254.333	NA	At1g52720 [Source:UniProtKB/TrEMBL%3BAcc:Q9SSS6]	None
AT1G52730	-0.154801	0.0951028	0.300941	20.6267	567.333	18.7302	503	NA	AT1G52730 protein [Source:UniProtKB/TrEMBL%3BAcc:Q9SSS7]	None
AT1G52740	0.282738	0.00224867	0.0205059	144.495	1781.33	176.286	2119.67	HTA9	Probable histone H2A variant 3 [Source:UniProtKB/Swiss-Prot%3BAcc:Q9C944]	None
AT1G52760	0.138578	0.0543504	0.208833	54.4889	1129.67	60.7904	1221.33	CSE	Caffeoylshikimate esterase [Source:UniProtKB/Swiss-Prot%3BAcc:Q9C942]	None
AT1G52780	0.121427	0.25332	0.532085	10.0165	514	11.0511	546.667	NA	Protein of unknown function (DUF2921) [Source:TAIR%3BAcc:AT1G52780]	None
AT1G52800	-0.490838	0.591189	NA	0.343061	4.33333	0.248047	3	NA	2-oxoglutarate (2OG) and Fe(II)-dependent oxygenase superfamily protein [Source:UniProtKB/TrEMBL%3BAcc:Q9C938]	None
AT1G52820	1.05978	0.0744744	0.258087	0.557065	8	1.1272	17	NA	2-oxoglutarate (2OG) and Fe(II)-dependent oxygenase superfamily protein [Source:UniProtKB/TrEMBL%3BAcc:Q9C936]	None
AT1G52870	-0.538678	1.15151e-09	8.50317e-08	111.039	2099.33	77.4186	1440	NA	At1g52870/F14G24_14 [Source:UniProtKB/TrEMBL%3BAcc:Q9C933]	None
AT1G52905	-0.964896	0.813073	NA	0.0969373	0.333333	0	0	NA	At1g52905 [Source:UniProtKB/TrEMBL%3BAcc:Q1EBU8]	None
AT1G52910	-0.0180892	0.929674	0.975821	11.5193	118.333	11.531	114.667	NA	At1g52910 [Source:UniProtKB/TrEMBL%3BAcc:Q9C930]	None
AT1G52930	-0.35009	0.000616651	0.00722254	29.2848	572.333	23.5413	437.333	BRIX1-2	Ribosome biogenesis protein BRX1 homolog 2 [Source:UniProtKB/Swiss-Prot%3BAcc:Q9C928]	None
AT1G52980	0.0631039	0.503949	0.754885	18.7095	678.667	19.8094	699.667	NUG2	Nuclear/nucleolar GTPase 2 [Source:UniProtKB/Swiss-Prot%3BAcc:Q9C923]	None
AT1G53050	-0.147625	0.121511	0.348196	18.4973	839.333	16.5122	746.333	NA	F8L10.9 protein [Source:UniProtKB/TrEMBL%3BAcc:Q9LNN0]	None
AT1G53060	0.551025	0.243491	0.520991	1.41171	11.6667	2.09483	16.6667	NA	Lectin-like protein At1g53060 [Source:UniProtKB/Swiss-Prot%3BAcc:Q9LNN1]	None
AT1G53070	-0.703862	1.79438e-05	0.000416719	15.4205	184.667	9.58174	109.667	NA	Lectin-like protein At1g53070 [Source:UniProtKB/Swiss-Prot%3BAcc:Q9LNN2]	None
AT1G53080	0.0400585	0.915448	0.971344	2.99983	25.3333	3.10797	25.3333	NA	Lectin-like protein At1g53080 [Source:UniProtKB/Swiss-Prot%3BAcc:Q9LNN3]	None
AT1G53090	-0.288952	0.013516	0.078569	11.5106	496.667	9.5126	402.667	SPA4	SPA4 [Source:UniProtKB/TrEMBL%3BAcc:A0A178WBA0]	None
AT1G53110	0.192225	0.397192	0.671362	2.06071	77.6667	2.43823	87.6667	PPI4	Proton pump-interactor 4 [Source:UniProtKB/Swiss-Prot%3BAcc:Q8VZN4]	None
AT1G53120	-0.158864	0.227546	0.501619	15.5072	261.667	13.9945	231.333	NA	At1g53120 [Source:UniProtKB/TrEMBL%3BAcc:Q93YQ0]	None
AT1G53140	-0.100542	0.549855	0.785706	3.34008	164.667	3.14973	151	DRP5A	DRP5A [Source:UniProtKB/TrEMBL%3BAcc:A0A178WBH9]	None
AT1G53160	-0.786825	0.384015	NA	0.379243	5.33333	0.191344	3	SPL4	Squamosa promoter-binding-like protein 4 [Source:UniProtKB/Swiss-Prot%3BAcc:Q9S7A9]	None
AT1G53163	-0.00945724	0.978598	0.993463	1.8948	32	1.87373	32.3333	NA	F12M16.3 [Source:UniProtKB/TrEMBL%3BAcc:Q9MAI8]	None
AT1G53165	0.0451841	0.67339	0.858751	7.35414	360.667	7.7466	365	ATMAP4K ALPHA1	Protein kinase superfamily protein [Source:UniProtKB/TrEMBL%3BAcc:F4HPR9]	None
AT1G53180	0.122569	0.372603	0.652496	10.4014	243	11.6374	257.667	NA	unknown protein%3B FUNCTIONS IN: molecular_function unknown%3B INVOLVED IN: biological_process unknown%3B LOCATED IN: cellular_component unknown%3B EXPRESSED IN: 13 plant structures%3B EXPRESSED DURING: 6 growth stages%3B BEST Arabidopsis thaliana protein match /.../nknown protein (TAIR:AT3G15115.1)%3B Ha. [Source:TAIR%3BAcc:AT1G53180]	None
AT1G53190	-0.0506342	0.641549	0.841393	13.9731	433.333	13.5551	409.667	NA	At1g53190 [Source:UniProtKB/TrEMBL%3BAcc:Q5EAI9]	None
AT1G53210	-0.0726933	0.219798	0.491781	155.099	4989	148.565	4640.33	NCL	Sodium/calcium exchanger NCL [Source:UniProtKB/Swiss-Prot%3BAcc:Q8L636]	None
AT1G53250	0.408189	0.0259304	0.12524	5.63194	128.667	7.75381	168	NA	unknown protein%3B BEST Arabidopsis thaliana protein match is: unknown protein (TAIR:AT1G53800.1)%3B Ha. [Source:TAIR%3BAcc:AT1G53250]	None
AT1G53270	0.170034	0.561804	0.792809	1.78972	53	2.00559	60	ABCG10	ABCG10 [Source:UniProtKB/TrEMBL%3BAcc:A0A178WBC4]	None
AT1G53290	-0.0275724	0.790592	0.919086	23.0794	469.333	22.6649	452	B3GALT14	Hexosyltransferase (Fragment) [Source:UniProtKB/TrEMBL%3BAcc:W8Q798]	None
AT1G53300	-0.0600589	0.512031	0.761155	20.7205	820.667	19.7391	776.333	TTL1	TPR repeat-containing thioredoxin TTL1 [Source:UniProtKB/Swiss-Prot%3BAcc:Q9MAH1]	None
AT1G53330	-0.606995	0.22945	0.50391	0.764628	17.3333	0.516637	11	NA	Putative pentatricopeptide repeat-containing protein At1g53330 [Source:UniProtKB/Swiss-Prot%3BAcc:Q9MAG8]	None
AT1G53345	-0.171829	0.264514	0.544456	5.89689	213.667	5.21744	188	NA	unknown protein%3B INVOLVED IN: biological_process unknown%3B LOCATED IN: endomembrane system%3B EXPRESSED IN: 8 plant structures%3B EXPRESSED DURING: 4 anthesis%2C F mature embryo stage%2C petal differentiation and expansion stage%2C E expanded cotyledon stage%2C /.../teral stage%3B BEST Arabidopsis thaliana protein match is: unknown protein (TAIR:AT5G09580.1)%3B Ha. [Source:TAIR%3BAcc:AT1G53345]	None
AT1G53370	0.611856	0.771114	NA	0.0492547	0.666667	0.0791406	1	NA	Putative F-box protein At1g53370 [Source:UniProtKB/Swiss-Prot%3BAcc:Q9MAG5]	None
AT1G53390	-0.12592	0.15075	0.395748	13.8331	906	12.7487	816	ABCG24	ABC transporter G family member 24 [Source:UniProtKB/Swiss-Prot%3BAcc:Q9MAG3]	None
AT1G53400	0.168862	0.161116	0.410708	25.2764	298	28.9005	327	NA	F12M16.29 [Source:UniProtKB/TrEMBL%3BAcc:Q9MAG2]	None
AT1G53430	0.188375	0.0242971	0.119551	16.8013	1054.33	19.5368	1174.67	NA	Probable LRR receptor-like serine/threonine-protein kinase At1g53430 [Source:UniProtKB/Swiss-Prot%3BAcc:C0LGG8]	None
AT1G53440	0.193577	0.0521787	0.203733	12.4788	679	14.4904	757.333	NA	Probable LRR receptor-like serine/threonine-protein kinase At1g53440 [Source:UniProtKB/Swiss-Prot%3BAcc:C0LGG9]	None
AT1G53470	-0.128625	0.489012	0.743161	3.41679	162.667	3.19863	145.333	MSL4	Mechanosensitive ion channel protein 4 [Source:UniProtKB/Swiss-Prot%3BAcc:Q9LPG3]	None
AT1G53490	-0.0429323	0.920552	0.972729	0.652746	26.6667	0.641803	25	HEI10	E3 ubiquitin-protein ligase CCNB1IP1 homolog [Source:UniProtKB/Swiss-Prot%3BAcc:F4HRI2]	None
AT1G53530	-0.0780784	0.601486	0.817338	14.2791	172.667	13.7189	160.667	NA	At1g53530 [Source:UniProtKB/TrEMBL%3BAcc:Q6NLT8]	None
AT1G53540	-0.750079	0.547604	NA	0.27153	3.66667	0.168085	2	HSP17.6C	17.6 kDa class I heat shock protein 3 [Source:UniProtKB/Swiss-Prot%3BAcc:P13853]	None
AT1G53542	0.607095	0.612366	NA	10.4488	2	14.3214	3	NA	At1g53545 [Source:UniProtKB/TrEMBL%3BAcc:Q84WL5]	None
AT1G53570	0.0179251	0.841346	0.941437	24.1123	961	24.5101	963	MAPKKK3	Mitogen-activated protein kinase kinase kinase 3 [Source:UniProtKB/Swiss-Prot%3BAcc:F4HRJ4]	None
AT1G53590	0.319288	0.00137299	0.0138722	11.8136	578.667	15.1248	709.333	NTMC2T6.1	C2 domain-containing protein At1g53590 [Source:UniProtKB/Swiss-Prot%3BAcc:Q93XX4]	None
AT1G53600	-0.515378	0.133631	0.368364	0.700197	35.6667	0.486097	24.6667	PCMP-E63	Pentatricopeptide repeat-containing protein At1g53600%2C mitochondrial [Source:UniProtKB/Swiss-Prot%3BAcc:Q9C8L6]	None
AT1G53660	-0.498209	0.135968	0.371751	3.06832	47.6667	2.57055	32	NA	nodulin MtN21 /EamA-like transporter family protein [Source:TAIR%3BAcc:AT1G53660]	None
AT1G53670	-0.217856	0.00302375	0.0257482	126.103	1303.67	109.501	1095	MSRB1	Peptide methionine sulfoxide reductase B1%2C chloroplastic [Source:UniProtKB/Swiss-Prot%3BAcc:Q9C8M2]	None
AT1G53680	-0.0349701	0.916397	0.971488	3.82039	36	3.78452	34.6667	GSTU28	Glutathione S-transferase U28 [Source:UniProtKB/Swiss-Prot%3BAcc:Q9C8M3]	None
AT1G53700	0.323929	0.0208727	0.107397	7.16877	182.667	9.05051	224.667	WAG1	Serine/threonine-protein kinase WAG1 [Source:UniProtKB/Swiss-Prot%3BAcc:Q9C8M5]	None
AT1G53708	0.126916	0.894853	NA	0.836976	5	0.937901	5.33333	RTFL9	ROTUNDIFOLIA like 9 [Source:UniProtKB/TrEMBL%3BAcc:F4HTB2]	None
AT1G53720	0.0261646	0.825423	0.934303	8.06791	307	8.33165	306	CYP59	Peptidyl-prolyl cis-trans isomerase CYP59 [Source:UniProtKB/Swiss-Prot%3BAcc:Q6Q151]	None
AT1G53730	0.112777	0.203086	0.469907	26.1607	1004	28.424	1070.33	SRF6	STRUBBELIG-receptor family 6 [Source:UniProtKB/TrEMBL%3BAcc:A8MQH3]	None
AT1G53800	-0.146424	0.0836402	0.278108	26.8514	1073.33	24.8055	959.333	NA	AT1G53800 protein [Source:UniProtKB/TrEMBL%3BAcc:B9DHC9]	None
AT1G53830	0.13407	0.336958	0.619214	11.1278	431.333	12.3684	459	PME2	Pectinesterase 2 [Source:UniProtKB/Swiss-Prot%3BAcc:Q42534]	None
AT1G53840	-0.0991129	0.205131	0.472561	45.6931	1734.67	43.3861	1597	PME1	Pectinesterase [Source:UniProtKB/TrEMBL%3BAcc:Q0WWC7]	None
AT1G53910	0.0645586	0.335316	0.617598	98.8174	2515.33	104.711	2579.67	RAP2-12	Ethylene-responsive transcription factor RAP2-12 [Source:UniProtKB/Swiss-Prot%3BAcc:Q9SSA8]	None
AT1G53920	-0.0798278	0.65257	0.848595	11.5833	220.333	11.1429	201.333	GLIP5	GLIP5 [Source:UniProtKB/TrEMBL%3BAcc:A0A178WKF5]	None
AT1G53940	0.919014	0.00134394	0.0136152	1.69017	36.6667	3.27725	67	GLIP2	GDSL esterase/lipase 2 [Source:UniProtKB/Swiss-Prot%3BAcc:Q9SYF0]	None
AT1G53990	0.485273	0.13954	0.377819	1.69085	27.6667	2.36544	37.6667	GLIP3	GDSL esterase/lipase 3 [Source:UniProtKB/Swiss-Prot%3BAcc:Q9SYF5]	None
AT1G54030	-0.0518219	0.587237	0.808753	46.9343	964	45.9598	903	MVP1	Inactive GDSL esterase/lipase-like protein 25 [Source:UniProtKB/Swiss-Prot%3BAcc:Q7XA74]	None
AT1G54060	-0.117988	0.281016	0.563454	15.2261	499.333	14.3584	454.667	ASIL1	Trihelix transcription factor ASIL1 [Source:UniProtKB/Swiss-Prot%3BAcc:Q9SYG2]	None
AT1G54070	-1.63177	0.687318	NA	0.137153	0.666667	0	0	NA	Dormancy-associated protein homolog 4 [Source:UniProtKB/Swiss-Prot%3BAcc:F4HV65]	None
AT1G54090	0.0488099	0.628793	0.834213	12.2829	499	13.0475	504.333	ATEXO70D2	Exocyst subunit Exo70 family protein [Source:UniProtKB/TrEMBL%3BAcc:Q9SYG5]	None
AT1G54095	0.191416	0.636974	0.83933	1.70372	24.3333	2.01288	26.6667	NA	At1g54095 [Source:UniProtKB/TrEMBL%3BAcc:Q6NNH0]	None
AT1G54110	-0.0340689	0.707891	0.876047	14.7743	592.333	14.5121	568	NA	Membrane fusion protein Use1 [Source:TAIR%3BAcc:AT1G54110]	None
AT1G54120	-0.202081	0.283753	0.566119	23.5096	144	20.5697	124.667	NA	F15I1.22 [Source:UniProtKB/TrEMBL%3BAcc:Q9SYH0]	None
AT1G54130	0.27315	0.00148042	0.0146831	25.7889	1092	31.5962	1299.33	RSH3	Probable GTP diphosphokinase RSH3%2C chloroplastic [Source:UniProtKB/Swiss-Prot%3BAcc:Q9SYH1]	None
AT1G54150	0.134868	0.337056	0.619334	9.15608	202.667	10.1864	217.333	SPL2	E3 ubiquitin-protein ligase SPL2 [Source:UniProtKB/Swiss-Prot%3BAcc:Q9SYH3]	None
AT1G54180	0.105601	0.636803	0.839245	2.18189	80.6667	2.33126	85.3333	BRXL3	Protein Brevis radix-like 3 [Source:UniProtKB/Swiss-Prot%3BAcc:Q5HZ09]	None
AT1G54200	0.0798018	0.738539	0.891938	4.84134	69	5.12631	72.6667	NA	Protein BIG GRAIN 1-like B [Source:UniProtKB/Swiss-Prot%3BAcc:Q9SLL2]	None
AT1G54210	0.156066	0.42924	0.697589	17.7101	108.333	19.9549	118	ATG12A	Ubiquitin-like protein ATG12 [Source:UniProtKB/TrEMBL%3BAcc:A0A178VZU7]	None
AT1G54215	-0.608723	0.622696	NA	1.03205	2.66667	0.687462	1.66667	NA	Proline-rich family protein [Source:UniProtKB/TrEMBL%3BAcc:Q3ECQ3]	None
AT1G54250	0.0821103	0.559141	0.791016	24.8661	223	26.3569	231.667	NRPB8A	DNA-directed RNA polymerases II and V subunit 8A [Source:UniProtKB/Swiss-Prot%3BAcc:O81097]	None
AT1G54260	1.20192	0.51637	NA	0.0626215	1	0.145295	2.33333	NA	Winged-helix DNA-binding transcription factor family protein [Source:UniProtKB/TrEMBL%3BAcc:F4HV94]	None
AT1G54270	-0.2453	5.17866e-05	0.00101764	116.994	3086.67	99.7342	2549	TIF4A-2	eIF4A-2 [Source:UniProtKB/TrEMBL%3BAcc:A0A178W4U1]	None
AT1G54310	0.0412489	0.759134	0.902898	10.9371	240.667	11.1645	245.667	NA	S-adenosyl-L-methionine-dependent methyltransferases superfamily protein [Source:UniProtKB/TrEMBL%3BAcc:F4HVA0]	None
AT1G54340	0.0517112	0.603725	0.818769	20.3397	619.667	21.492	622	ICDH	Peroxisomal isocitrate dehydrogenase [NADP] [Source:UniProtKB/Swiss-Prot%3BAcc:Q9SLK0]	None
AT1G54350	-0.110145	0.178265	0.435838	44.8192	1651.67	41.8572	1509.33	ABCC2	ABC transporter D family member 2%2C chloroplastic [Source:UniProtKB/Swiss-Prot%3BAcc:Q6NLC1]	None
AT1G54360	0.118668	0.184888	0.444333	21.9384	578.333	23.9372	615.333	TAF6B	TBP-ASSOCIATED FACTOR 6B [Source:TAIR%3BAcc:AT1G54360]	None
AT1G54400	-0.0218296	0.983846	NA	0.448296	2.66667	0.433701	2.66667	NA	HSP20-like chaperones superfamily protein [Source:UniProtKB/TrEMBL%3BAcc:F4HWW7]	None
AT1G54440	0.0448513	0.721894	0.882424	6.43934	268.333	6.66634	274	NA	Polynucleotidyl transferase%2C ribonuclease H fold protein with HRDC domain-containing protein [Source:UniProtKB/TrEMBL%3BAcc:F4HWX0]	None
AT1G54470	-0.321411	0.794423	NA	0.0551797	3.66667	0.0523344	2.66667	RPP27	AT1G54470	None
AT1G54490	0.942663	7.79027e-30	8.18151e-27	18.988	1202	36.57	2273	XRN4	XRN4 [Source:UniProtKB/TrEMBL%3BAcc:A0A384KRW9]	None
AT1G54520	-0.168946	0.022341	0.113166	76.5876	1645.33	68.3466	1435.67	NA	Myelin-associated oligodendrocyte basic protein [Source:UniProtKB/TrEMBL%3BAcc:Q8RWI0]	None
AT1G54530	0.139556	0.866651	NA	2.302	6	2.6771	6	NA	Calcium-binding EF hand family protein [Source:TAIR%3BAcc:AT1G54530]	None
AT1G54575	0.323788	0.0084654	0.0550878	29.732	278	37.8489	340.667	NA	unknown protein%3B Ha. [Source:TAIR%3BAcc:AT1G54575]	None
AT1G54580	-0.122452	0.185791	0.445346	164.958	1810	152.964	1612.33	ACP2	Acyl carrier protein 2%2C chloroplastic [Source:UniProtKB/Swiss-Prot%3BAcc:P25701]	None
[truncated: 19,875 more rows]

## Sheet: brs1-1
Table S1 Identification of DEGs in BRS1 mutants
Gene	log2FoldChange	pvalue	padj	WS2_FPKM	WS2_Count	brs1_FPKM	brs1_Count	Gene_name	Description	Type
AT4G30610	-3.03025	3.1607e-145	6.9135e-141	32.9641	961	4.09685	114.333	SCPL24	Serine carboxypeptidase 24 [Source:UniProtKB/Swiss-Prot%3BAcc:Q9M099]	DOWN
AT1G01010	0.10344	0.530252	1	5.95162	177.333	6.4982	190.333	NAC001	NAC domain-containing protein 1 [Source:UniProtKB/Swiss-Prot%3BAcc:Q0WV96]	None
AT1G01040	0.00878039	0.929626	1	9.2593	1169.33	9.52922	1171.33	DCL1	Dicer-like 1 [Source:UniProtKB/TrEMBL%3BAcc:F4HQG6]	None
AT1G01110	-0.176267	0.463837	1	2.07678	70.3333	2.0084	61.3333	IQD18	IQ-domain 18 [Source:UniProtKB/TrEMBL%3BAcc:Q9MAM4]	None
AT1G01160	-0.0173753	0.865269	1	22.2132	418.667	22.1226	409.333	GIF2	GRF1-interacting factor 2 [Source:UniProtKB/TrEMBL%3BAcc:F4HQJ3]	None
AT1G01180	0.0835607	0.471338	1	18.8109	398.333	19.8232	415	NA	S-adenosyl-L-methionine-dependent methyltransferases superfamily protein [Source:UniProtKB/TrEMBL%3BAcc:F4HS78]	None
AT1G01210	-0.147509	0.27318	1	25.6892	267.667	23.4399	237.667	NA	DNA-directed RNA polymerase subunit [Source:UniProtKB/TrEMBL%3BAcc:Q9LNK0]	None
AT1G01220	-0.0694435	0.504115	1	8.66769	520	8.35941	492.667	FKGP	Bifunctional fucokinase/fucose pyrophosphorylase [Source:UniProtKB/Swiss-Prot%3BAcc:Q9LNJ9]	None
AT1G01225	-0.00289714	0.979122	1	42.9452	475.333	42.9485	465	NA	At1g01225 [Source:UniProtKB/TrEMBL%3BAcc:Q29PY0]	None
AT1G01240	-0.13712	0.273386	1	11.5843	267	10.8397	240.667	NA	At1g01240/F6F3_11 [Source:UniProtKB/TrEMBL%3BAcc:Q9LNJ7]	None
AT1G01260	-0.0067081	0.961499	1	5.42045	243.333	5.49405	244	BHLH13	Transcription factor bHLH13 [Source:UniProtKB/Swiss-Prot%3BAcc:Q9LNJ5]	None
AT1G01290	-0.230661	0.104003	1	13.9752	225	12.2935	190.667	CNX3	Cyclic pyranopterin monophosphate synthase%2C mitochondrial [Source:UniProtKB/Swiss-Prot%3BAcc:Q39056]	None
AT1G01300	-0.0285542	0.718346	1	75.9736	2158	72.5425	2089.67	APF2	Aspartyl protease family protein 2 [Source:UniProtKB/Swiss-Prot%3BAcc:Q9LNJ3]	None
AT1G01310	-0.0434754	0.985465	1	0.0422083	0.666667	0.040461	0.666667	NA	At1g01310 [Source:UniProtKB/TrEMBL%3BAcc:Q6ID87]	None
AT1G01350	-0.0811096	0.506831	1	12.1929	306.667	11.9864	285.667	NA	Zinc finger CCCH domain-containing protein 1 [Source:UniProtKB/Swiss-Prot%3BAcc:Q8GX84]	None
AT1G01355	0.44486	0.650662	1	0.361661	3.33333	0.501557	4.33333	NA	Putative endonuclease or glycosyl hydrolase [Source:UniProtKB/TrEMBL%3BAcc:F4HSA3]	None
AT1G01360	-0.14765	0.309034	1	14.9308	223	13.8908	198.667	PYL9	RCAR1 [Source:UniProtKB/TrEMBL%3BAcc:A0A178W4H4]	None
AT1G01370	-0.0087693	0.971962	1	4.60153	59.6667	4.5188	58.6667	HTR12	Histone H3-like centromeric protein HTR12 [Source:UniProtKB/Swiss-Prot%3BAcc:Q8RVQ9]	None
AT1G01380	-0.278424	0.582813	1	1.93476	13	1.63225	10.6667	ETC1	MYB-like transcription factor ETC1 [Source:UniProtKB/Swiss-Prot%3BAcc:Q9LNI5]	None
AT1G01480	-0.118055	0.753383	1	0.814815	26.6667	0.734259	24	ACS2	1-aminocyclopropane-1-carboxylate synthase 2 [Source:UniProtKB/Swiss-Prot%3BAcc:Q06402]	None
AT1G01500	0.0730184	0.564054	1	9.59412	225.333	10.2044	235.667	NA	Uncharacterized protein At1g01500 [Source:UniProtKB/Swiss-Prot%3BAcc:Q8GUH2]	None
AT1G01510	0.0241549	0.787908	1	21.9786	846	22.6738	854.667	AN	C-terminal binding protein AN [Source:UniProtKB/Swiss-Prot%3BAcc:O23702]	None
AT1G01520	0.047878	0.918882	1	1.6305	18.3333	1.68164	19.3333	NA	ASG4 [Source:UniProtKB/TrEMBL%3BAcc:A0A384LJW3]	None
AT1G01540	-0.0210734	0.779014	1	41.9811	1618	42.0125	1598.67	NA	Probable serine/threonine-protein kinase At1g01540 [Source:UniProtKB/Swiss-Prot%3BAcc:Q3EDL4]	None
AT1G01550	0.0492856	0.478709	1	116.939	2220.67	121.964	2294.33	BPS1	Protein BPS1%2C chloroplastic [Source:UniProtKB/Swiss-Prot%3BAcc:Q9LMM6]	None
AT1G01560	-0.830777	0.210374	1	0.546952	12.3333	0.342155	6.66667	MPK11	Mitogen-activated protein kinase 11 [Source:UniProtKB/Swiss-Prot%3BAcc:Q9LMM5]	None
AT1G01570	0.246026	0.49328	1	1.16416	26.6667	1.37755	31.6667	NA	F22L4.11 protein [Source:UniProtKB/TrEMBL%3BAcc:Q9LMM4]	None
AT1G01580	0.732707	0.0359255	1	0.576339	21	0.949611	35.3333	FRO2	ferric reduction oxidase 2 [Source:TAIR%3BAcc:AT1G01580]	None
AT1G01590	-0.282258	0.770225	1	0.173697	5	0.132502	4.66667	FRO1	Probable ferric reduction oxidase 1 [Source:UniProtKB/Swiss-Prot%3BAcc:Q9LMM2]	None
AT1G01600	0.16003	0.242063	1	7.62203	304	8.61256	329.333	CYP86A4	Cytochrome P450 86A4 [Source:UniProtKB/Swiss-Prot%3BAcc:Q9LMM1]	None
AT1G01630	0.0796484	0.313041	1	53.9363	1113.33	57.8892	1155.67	NA	Polyphosphoinositide binding protein%2C putative [Source:UniProtKB/TrEMBL%3BAcc:Q9LQ96]	None
AT1G01690	-0.0635593	0.73442	1	3.90348	117.333	3.83164	109.333	ATPRD3	Putative recombination initiation defects 3 [Source:UniProtKB/TrEMBL%3BAcc:F4HU48]	None
AT1G01695	-0.386183	0.76861	1	0.126091	2.66667	0.10327	2	NA	TRM33 [Source:UniProtKB/TrEMBL%3BAcc:A0A178WAP9]	None
AT1G01710	0.0399962	0.663797	1	13.423	586.333	13.9279	601.667	NA	Acyl-CoA thioesterase II [Source:UniProtKB/TrEMBL%3BAcc:F4HU51]	None
AT1G01720	-0.0792844	0.307959	1	46.5254	1074	43.8473	1005	NAC002	NAC domain-containing protein 2 [Source:UniProtKB/Swiss-Prot%3BAcc:Q39013]	None
AT1G01730	-0.112831	0.372355	1	22.5868	289	21.214	264.333	NA	T1N6.14 protein [Source:UniProtKB/TrEMBL%3BAcc:Q9LQ83]	None
AT1G01750	0.147616	0.530919	1	11.7473	117	13.2047	127.667	ADF11	actin depolymerizing factor 11 [Source:TAIR%3BAcc:AT1G01750]	None
AT1G01770	-0.0238207	0.79092	1	21.3629	747	22.6547	733.667	NA	Propionyl-CoA carboxylase [Source:UniProtKB/TrEMBL%3BAcc:Q8GZ85]	None
AT1G01790	0.126044	0.170998	1	74.0944	3707.33	76.6085	4073.67	KEA1	K(+) efflux antiporter 1%2C chloroplastic [Source:UniProtKB/Swiss-Prot%3BAcc:Q9ZTZ7]	None
AT1G01800	-0.00854057	0.90189	1	83.4723	1428.67	85.1084	1405	NA	AT1G01800 protein [Source:UniProtKB/TrEMBL%3BAcc:Q94K30]	None
AT1G01810	-0.390044	0.497639	1	1.2574	12	0.960797	9.33333	NA	T1N6.23 [Source:UniProtKB/TrEMBL%3BAcc:Q9LQ74]	None
AT1G01840	0.0469106	0.923539	1	1.39072	18.6667	1.46443	19.3333	NA	AP2-like ethylene-responsive transcription factor SNZ [Source:UniProtKB/TrEMBL%3BAcc:Q9LQ71]	None
AT1G01900	0.0208273	0.872437	1	5.85361	274.667	5.89132	277.667	SBTI1.1	SBTI1.1 [Source:UniProtKB/TrEMBL%3BAcc:A0A178W900]	None
AT1G01920	0.0248077	0.847909	1	8.15802	262.667	8.44185	264.333	NA	SET domain-containing protein [Source:UniProtKB/TrEMBL%3BAcc:F4HU79]	None
AT1G01940	-0.140437	0.36136	1	23.3445	247	21.5062	219.667	CYP18-1	Peptidyl-prolyl cis-trans isomerase CYP18-1 [Source:UniProtKB/Swiss-Prot%3BAcc:Q9LPC7]	None
AT1G01950	0.0156606	0.878188	1	8.8271	515.333	9.1078	519.333	ARK2	Kinesin-like protein [Source:UniProtKB/TrEMBL%3BAcc:F4HU83]	None
AT1G01970	-0.0847295	0.338196	1	25.5222	733.667	24.545	684.667	NA	Pentatricopeptide repeat-containing protein At1g01970 [Source:UniProtKB/Swiss-Prot%3BAcc:Q9LPC4]	None
AT1G02000	-0.032224	0.794321	1	10.6843	336	10.3765	326.333	GAE2	UDP-glucuronate 4-epimerase 2 [Source:UniProtKB/Swiss-Prot%3BAcc:Q9LPC1]	None
AT1G02010	-0.118764	0.398346	1	4.79842	217.333	4.4809	200.333	SEC1A	secretory 1A [Source:TAIR%3BAcc:AT1G02010]	None
AT1G02065	0.307704	0.228998	1	2.07713	54	2.53725	65.6667	SPL8	Squamosa promoter-binding-like protein 8 [Source:UniProtKB/Swiss-Prot%3BAcc:Q8GXL3]	None
AT1G02080	-0.00144169	0.987126	1	19.4753	2404.67	19.6317	2389	NA	Transcription regulator [Source:UniProtKB/TrEMBL%3BAcc:F4HVV6]	None
AT1G02100	0.00234973	0.978781	1	36.1749	1695.33	38.2823	1689.33	LCMT1	Leucine carboxyl methyltransferase 1 homolog [Source:UniProtKB/Swiss-Prot%3BAcc:Q8VY08]	None
AT1G02120	0.012251	0.854229	1	38.9042	1671.67	40.1468	1678.33	VAD1	Protein VASCULAR ASSOCIATED DEATH 1%2C chloroplastic [Source:UniProtKB/Swiss-Prot%3BAcc:F4HVW5]	None
AT1G02145	-0.0267874	0.66147	1	94.3962	3489.67	89.6658	3381	ALG12	Dol-P-Man:Man(7)GlcNAc(2)-PP-Dol alpha-1%2C6-mannosyltransferase [Source:UniProtKB/Swiss-Prot%3BAcc:A8MR93]	None
AT1G02160	-0.190947	0.160787	1	47.7495	325.333	42.6007	279.333	NA	Cox19 family protein (CHCH motif) [Source:UniProtKB/TrEMBL%3BAcc:A8MQS6]	None
AT1G02170	0.0230601	0.794895	1	35.3339	734	35.8267	735.667	AMC1	MCP1b [Source:UniProtKB/TrEMBL%3BAcc:A0A178W8H4]	None
AT1G02190	0.924485	0.301415	1	0.0783539	3	0.138805	6	NA	Protein CER1-like 1 [Source:UniProtKB/Swiss-Prot%3BAcc:F4HVX7]	None
AT1G02205	0.0177577	0.904691	1	10.8409	414	11.0467	412	CER1	Fatty acid hydroxylase superfamily [Source:TAIR%3BAcc:AT1G02205]	None
AT1G02300	0.0386025	0.604919	1	100.131	2268.33	104.532	2302.33	CATHB1	Cathepsin B-like protease 1 [Source:UniProtKB/Swiss-Prot%3BAcc:F4HVZ1]	None
AT1G02350	-0.0987914	0.510803	1	10.9528	250	10.7124	227.667	NA	Protoporphyrinogen oxidase-like protein [Source:UniProtKB/TrEMBL%3BAcc:F4HVZ8]	None
AT1G02370	-0.123979	0.476488	1	4.49304	142.667	4.27017	128	NA	Pentatricopeptide repeat-containing protein At1g02370%2C mitochondrial [Source:UniProtKB/Swiss-Prot%3BAcc:Q9FZ24]	None
AT1G02380	0.0205609	0.958402	1	1.47583	24.6667	1.48922	25.6667	NA	T6A9.7 protein [Source:UniProtKB/TrEMBL%3BAcc:Q9FZ23]	None
AT1G02390	-0.163832	0.790638	1	0.419407	11.6667	0.401935	9.33333	GPAT2	Probable glycerol-3-phosphate acyltransferase 2 [Source:UniProtKB/Swiss-Prot%3BAcc:Q9FZ22]	None
AT1G02400	-0.102206	0.612287	1	5.1117	100	4.72371	94.6667	GA2OX6	Gibberellin 2-beta-dioxygenase 6 [Source:UniProtKB/Swiss-Prot%3BAcc:Q9FZ21]	None
AT1G02410	0.104664	0.365776	1	19.5464	342	21.27	364	COX11	Cytochrome c oxidase assembly protein COX11%2C mitochondrial [Source:UniProtKB/Swiss-Prot%3BAcc:Q8GWR0]	None
AT1G02420	0.107478	0.807002	1	1.16852	28	1.23408	32	NA	Putative pentatricopeptide repeat-containing protein At1g02420 [Source:UniProtKB/Swiss-Prot%3BAcc:Q9FZ19]	None
AT1G02500	-0.0257552	0.684382	1	437.712	11225.3	431.369	10940	SAM1	S-adenosylmethionine synthase [Source:UniProtKB/TrEMBL%3BAcc:A0A178WES1]	None
AT1G02520	0.230806	0.153739	1	2.89658	225	3.46899	262.333	ABCB11	ABC transporter B family member 11 [Source:UniProtKB/Swiss-Prot%3BAcc:Q9FWX7]	None
AT1G02530	-0.32361	0.684472	1	0.0821818	6.66667	0.0675054	5.33333	ABCB12	PGP12 [Source:UniProtKB/TrEMBL%3BAcc:A0A178WBY9]	None
AT1G02560	-0.0177422	0.770789	1	267.326	5278.33	267.684	5131	CLPP5	ATP-dependent Clp protease proteolytic subunit [Source:UniProtKB/TrEMBL%3BAcc:A0A178WMF0]	None
AT1G02570	0.0204596	0.97372	1	0.890396	10.6667	0.89477	11	NA	Transmembrane protein [Source:UniProtKB/TrEMBL%3BAcc:Q1PFZ3]	None
AT1G02575	1.53874	0.211132	1	0.139646	1.66667	0.426094	4.66667	NA	unknown protein%3B BEST Arabidopsis thaliana protein match is: unknown protein (TAIR:AT1G02570.1). [Source:TAIR%3BAcc:AT1G02575]	None
AT1G02580	0.730944	0.494047	1	0.0489584	2.33333	0.0911939	3.66667	MEA	Histone-lysine N-methyltransferase MEDEA [Source:UniProtKB/Swiss-Prot%3BAcc:O65312]	None
AT1G02620	1.63845	0.0845708	1	0.187671	1.66667	0.662392	5	NA	Ras-related small GTP-binding family protein [Source:UniProtKB/TrEMBL%3BAcc:Q3E6Q3]	None
AT1G02640	-0.0503539	0.629755	1	14.3314	738.667	13.8325	701.333	BXL2	Probable beta-D-xylosidase 2 [Source:UniProtKB/Swiss-Prot%3BAcc:Q94KD8]	None
AT1G02650	-0.00249263	0.99328	1	1.6907	41	1.68925	40.3333	NA	T14P4.7 protein [Source:UniProtKB/TrEMBL%3BAcc:Q9FWY3]	None
AT1G02670	-0.0997656	0.788047	1	0.700982	31	0.679741	28	NA	P-loop containing nucleoside triphosphate hydrolases superfamily protein [Source:TAIR%3BAcc:AT1G02670]	None
AT1G02680	-0.158466	0.34191	1	11.4403	149	9.93606	133	TAF13	Transcription initiation factor TFIID subunit 13 [Source:UniProtKB/Swiss-Prot%3BAcc:Q6NQH4]	None
AT1G02690	-0.0419234	0.727821	1	9.28381	312.333	9.13538	302	IMPA-6	Importin subunit alpha [Source:UniProtKB/TrEMBL%3BAcc:F4HXL3]	None
AT1G02700	-0.192849	0.379532	1	3.09157	92	2.68452	81.3333	NA	GATA transcription factor-like protein [Source:UniProtKB/TrEMBL%3BAcc:Q9FWY8]	None
AT1G02720	-0.00707673	0.964503	1	9.33936	219	9.14732	222	GATL5	Probable galacturonosyltransferase-like 5 [Source:UniProtKB/Swiss-Prot%3BAcc:Q9FWY9]	None
AT1G02750	-0.207051	0.264659	1	11.1389	149	9.78702	128.667	DI19-2	Protein DEHYDRATION-INDUCED 19 homolog 2 [Source:UniProtKB/Swiss-Prot%3BAcc:Q8GWK1]	None
AT1G02810	0.227866	0.165261	1	8.3337	280.333	9.69607	332.667	PME7	Probable pectinesterase/pectinesterase inhibitor 7 [Source:UniProtKB/Swiss-Prot%3BAcc:Q9SRX4]	None
AT1G02813	-2.37177	0.287295	1	0.300257	2	0.05485	0.333333	NA	Protein of unknown function%2C DUF538 [Source:TAIR%3BAcc:AT1G02813]	None
AT1G02816	-0.115514	0.378974	1	26.4294	321.667	24.8289	289	NA	F22D16.19 protein [Source:UniProtKB/TrEMBL%3BAcc:Q9SRX5]	None
AT1G02840	-0.0327928	0.671534	1	108.91	2571	108.061	2498	SR34	Serine/arginine-rich-splicing factor SR34 [Source:UniProtKB/Swiss-Prot%3BAcc:O22315]	None
AT1G02850	0.116476	0.263288	1	20.2404	617.333	22.347	660.333	BGLU11	Beta-glucosidase 11 [Source:UniProtKB/Swiss-Prot%3BAcc:B3H5Q1]	None
AT1G02860	-0.0438774	0.765689	1	10.8001	246.667	10.7017	235	BAH1	E3 ubiquitin-protein ligase BAH1 [Source:UniProtKB/Swiss-Prot%3BAcc:Q9SRX9]	None
AT1G02970	0.440589	0.0864007	1	1.71567	56.6667	2.38528	75.3333	WEE1	Wee1-like protein kinase [Source:UniProtKB/Swiss-Prot%3BAcc:Q8L4H0]	None
AT1G02980	2.24965	0.248909	1	0.00631873	0.333333	0.0432049	1.66667	CUL2	Cullin-2 [Source:UniProtKB/Swiss-Prot%3BAcc:Q9SRZ0]	None
AT1G03010	-0.0940865	0.822858	1	0.682705	20	0.634135	19	NA	BTB/POZ domain-containing protein At1g03010 [Source:UniProtKB/Swiss-Prot%3BAcc:Q9SA69]	None
AT1G03030	0.0288572	0.81733	1	13.5748	296.667	13.937	302	NA	At1g03030 [Source:UniProtKB/TrEMBL%3BAcc:Q500U9]	None
AT1G03050	0.986675	0.763525	1	0.00676397	0.333333	0.019502	0.666667	NA	Putative clathrin assembly protein At1g03050 [Source:UniProtKB/Swiss-Prot%3BAcc:Q9SA65]	None
AT1G03070	0.484646	0.174787	1	1.80612	22.3333	2.54446	31	LFG4	Protein LIFEGUARD 4 [Source:UniProtKB/Swiss-Prot%3BAcc:Q9SA63]	None
AT1G03090	-0.0749076	0.421063	1	13.1287	696	12.6812	652.667	MCCA	Methylcrotonoyl-CoA carboxylase subunit alpha%2C mitochondrial [Source:UniProtKB/Swiss-Prot%3BAcc:Q42523]	None
AT1G03110	-0.14999	0.29795	1	9.8115	255	8.93312	227.333	TRM82	tRNA (guanine-N(7)-)-methyltransferase non-catalytic subunit [Source:UniProtKB/TrEMBL%3BAcc:A0A178VZV6]	None
AT1G03120	0.255708	0.736014	1	0.820977	6	0.998112	7	ATRAB28	Late embryogenesis abundant protein 3 [Source:UniProtKB/Swiss-Prot%3BAcc:Q9SA57]	None
AT1G03150	-0.179334	0.187014	1	21.9496	234.667	19.5956	207.333	NAA20	N-terminal acetyltransferase B complex catalytic subunit NAA20 [Source:UniProtKB/Swiss-Prot%3BAcc:Q8LGI8]	None
AT1G03160	0.0205413	0.808969	1	22.5267	1113	23.0802	1120	FZL	Probable transmembrane GTPase FZO-like%2C chloroplastic [Source:UniProtKB/Swiss-Prot%3BAcc:Q1KPV0]	None
AT1G03170	-0.779061	0.481802	1	0.183851	3	0.11437	1.66667	FAF2	Protein FANTASTIC FOUR 2 [Source:UniProtKB/Swiss-Prot%3BAcc:Q8GXU9]	None
AT1G03180	0.185155	0.497118	1	3.0954	50.6667	3.62508	55.6667	NA	Non-structural protein [Source:UniProtKB/TrEMBL%3BAcc:Q5Q0J3]	None
AT1G03190	0.0722547	0.594828	1	4.94489	240	5.28655	250.333	XPD	UVH6 [Source:UniProtKB/TrEMBL%3BAcc:A0A178W4P7]	None
AT1G03200	0.164638	0.203739	1	19.3247	256.333	23.7562	281.333	NA	At1g03200 [Source:UniProtKB/TrEMBL%3BAcc:B6IDH7]	None
AT1G03220	0.0627084	0.518521	1	131.097	3122.67	136.156	3204.33	NA	Eukaryotic aspartyl protease family protein [Source:UniProtKB/TrEMBL%3BAcc:Q9ZVS4]	None
AT1G03230	-0.00994729	0.917437	1	55.2985	1236.33	54.4072	1199	NA	Eukaryotic aspartyl protease family protein [Source:UniProtKB/TrEMBL%3BAcc:Q9ZVS5]	None
AT1G03270	-0.0232242	0.92777	1	2.24496	62.6667	2.20916	61.3333	CBSDUF4	Putative DUF21 domain-containing protein At1g03270 [Source:UniProtKB/Swiss-Prot%3BAcc:Q9ZVS8]	None
AT1G03280	-0.0686328	0.408277	1	19.1062	767.333	18.7383	726.333	NA	TFIIE-alpha 1 [Source:UniProtKB/TrEMBL%3BAcc:Q93ZW3]	None
AT1G03290	-0.0131848	0.91578	1	10.8744	364.667	11.1982	362.667	NA	ELKS/Rab6-interacting/CAST family protein [Source:UniProtKB/TrEMBL%3BAcc:Q9ZVT0]	None
AT1G03310	0.0870665	0.320256	1	19.1708	955	20.7878	1008.33	ISA2	ISA2 [Source:UniProtKB/TrEMBL%3BAcc:A0A178WGA8]	None
AT1G03320	-0.348235	0.66385	1	0.576408	7.33333	0.481751	5.33333	NA	F15K9.8 [Source:UniProtKB/TrEMBL%3BAcc:Q9ZVT3]	None
AT1G03340	-0.356411	0.343991	1	1.61545	28.3333	1.28532	22	NA	F15K9.6 [Source:UniProtKB/TrEMBL%3BAcc:Q9ZVT5]	None
AT1G03360	0.059396	0.722784	1	7.67158	162.333	8.14454	169	RRP4	RRP4 [Source:UniProtKB/TrEMBL%3BAcc:A0A178W3N1]	None
AT1G03365	0.139592	0.198736	1	6.45577	335	7.30822	366	RF4	Putative E3 ubiquitin-protein ligase RF4 [Source:UniProtKB/Swiss-Prot%3BAcc:Q9ZVT8]	None
AT1G03370	0.137307	0.16945	1	9.00727	612	10.1124	664.333	NA	C2 and GRAM domain-containing protein At1g03370 [Source:UniProtKB/Swiss-Prot%3BAcc:Q9ZVT9]	None
AT1G03380	0.0293703	0.754622	1	16.4747	1115	16.9924	1140.67	ATG18G	Autophagy-related protein 18g [Source:UniProtKB/Swiss-Prot%3BAcc:Q8GUL1]	None
AT1G03430	0.0720031	0.678364	1	13.8706	174.333	14.7665	182	AHP5	histidine-containing phosphotransfer factor 5 [Source:TAIR%3BAcc:AT1G03430]	None
AT1G03440	-0.175944	0.0757231	1	28.1782	590	24.5089	519.333	NA	Leucine-rich repeat (LRR) family protein [Source:UniProtKB/TrEMBL%3BAcc:F4I0W7]	None
AT1G03495	-0.0804537	0.600262	1	7.47747	227.333	6.73042	218.333	NA	HXXXD-type acyl-transferase family protein [Source:TAIR%3BAcc:AT1G03495]	None
AT1G03540	0.142763	0.911589	1	0.327713	12.6667	0.375001	14	PCMP-E4	Pentatricopeptide repeat-containing protein At1g03540 [Source:UniProtKB/Swiss-Prot%3BAcc:Q9LR69]	None
AT1G03600	-0.137017	0.0112537	1	707.039	7179	646.205	6461	PSB27-1	Photosystem II repair protein PSB27-H1%2C chloroplastic [Source:UniProtKB/Swiss-Prot%3BAcc:Q9LR64]	None
AT1G03610	-0.0460754	0.680665	1	16.0945	390.667	15.8099	376.667	NA	Plant/protein (DUF789) [Source:UniProtKB/TrEMBL%3BAcc:Q8LF98]	None
AT1G03630	0.0617928	0.361869	1	115.7	2652.67	122.897	2771.67	PORC	Protochlorophyllide reductase C%2C chloroplastic [Source:UniProtKB/Swiss-Prot%3BAcc:O48741]	None
AT1G03687	-0.0057705	0.966145	1	10.115	253	10.236	250	NA	DTW domain-containing protein [Source:UniProtKB/TrEMBL%3BAcc:F4I2G3]	None
AT1G03700	0.27074	0.451665	1	3.27778	26.6667	4.12115	31	NA	CASP-like protein 1C2 [Source:UniProtKB/Swiss-Prot%3BAcc:Q9LR57]	None
AT1G03710	2.06681	0.0458421	1	0.0981059	1.66667	0.411108	6.66667	NA	Cystatin/monellin superfamily protein [Source:UniProtKB/TrEMBL%3BAcc:Q58G57]	None
AT1G03740	0.195973	0.0487418	1	11.5756	632.667	13.5616	723	NA	F21B7.34 [Source:UniProtKB/TrEMBL%3BAcc:Q9LR53]	None
AT1G03750	-0.0142816	0.938346	1	2.19847	110.667	2.21925	109.333	SWI2	Switch 2 [Source:UniProtKB/Swiss-Prot%3BAcc:F4I2H2]	None
AT1G03770	0.191249	0.343171	1	2.51672	87.3333	2.93977	101	RING1B	RING 1B [Source:UniProtKB/TrEMBL%3BAcc:F4I2H4]	None
AT1G03790	-0.111432	0.878715	1	0.374836	7.66667	0.341784	7.33333	SOM	Zinc finger CCCH domain-containing protein 2 [Source:UniProtKB/Swiss-Prot%3BAcc:Q9ZWA1]	None
AT1G03810	0.956424	0.814681	1	0	0	0.0697887	0.333333	NA	F11M21.26 protein [Source:UniProtKB/TrEMBL%3BAcc:Q9ZWA3]	None
AT1G03880	-0.389271	0.851804	1	0.0283341	1	0.0230251	0.666667	CRB	CRU2 [Source:UniProtKB/TrEMBL%3BAcc:A0A178W5K4]	None
AT1G03900	-0.00558706	0.936508	1	77.3861	1701.33	77.7416	1674	ATNAP4	NAP4 [Source:UniProtKB/TrEMBL%3BAcc:A0A178WMR3]	None
AT1G03905	-0.143344	0.554106	1	3.64531	79.6667	3.39437	71.3333	ABCI19	ABC transporter I family member 19 [Source:UniProtKB/Swiss-Prot%3BAcc:Q3EDJ0]	None
AT1G03910	0.000195035	0.998105	1	20.6531	1017.67	21.409	1002.67	CTN	Cactin [Source:UniProtKB/Swiss-Prot%3BAcc:F4I2J8]	None
AT1G03920	-0.00915352	0.970332	1	1.76759	61.6667	1.75482	62	NA	Non-specific serine/threonine protein kinase [Source:UniProtKB/TrEMBL%3BAcc:F4I2K0]	None
AT1G03930	-0.0570987	0.549741	1	15.4947	610	15.1038	584.333	CKL9	Casein kinase 1-like protein 9 [Source:UniProtKB/Swiss-Prot%3BAcc:Q9ZWB3]	None
AT1G03960	0.0189329	0.902873	1	4.6446	167.667	4.7192	170.667	B''EPSILON	Probable serine/threonine protein phosphatase 2A regulatory subunit B''epsilon [Source:UniProtKB/Swiss-Prot%3BAcc:Q84JI6]	None
AT1G03970	-0.137871	0.487649	1	5.44139	108.667	5.09001	97.6667	GBF4	At1g03970 [Source:UniProtKB/TrEMBL%3BAcc:Q2HIT6]	None
AT1G03990	-0.520382	0.355267	1	0.466831	23.3333	0.341044	15.3333	FAO1	Long-chain-alcohol oxidase FAO1 [Source:UniProtKB/Swiss-Prot%3BAcc:Q9ZWB9]	None
AT1G04020	-0.100231	0.510594	1	4.94936	205.667	4.76071	187.333	ATBARD1	ROW1 [Source:UniProtKB/TrEMBL%3BAcc:A0A384KH31]	None
AT1G04030	-0.23214	0.227445	1	3.47329	109.667	2.98641	94	NA	unknown protein%3B BEST Arabidopsis thaliana protein match is: unknown protein (TAIR:AT5G44040.1)%3B Ha. [Source:TAIR%3BAcc:AT1G04030]	None
AT1G04080	-0.0371955	0.592773	1	37.3771	2026	36.2757	1967.67	PRP39	Tetratricopeptide repeat (TPR)-like superfamily protein [Source:UniProtKB/TrEMBL%3BAcc:F4I448]	None
AT1G04090	-0.162431	0.354559	1	4.29935	126.333	3.82102	112.333	NA	At1g04090 [Source:UniProtKB/TrEMBL%3BAcc:Q501D1]	None
AT1G04130	-0.106132	0.5796	1	6.61076	151	6.28468	137.667	TPR2	Tetratricopeptide repeat (TPR)-like superfamily protein [Source:UniProtKB/TrEMBL%3BAcc:F4I456]	None
AT1G04160	0.0942648	0.484698	1	3.75747	234	4.16393	248.333	XI-B	Myosin-8 [Source:UniProtKB/Swiss-Prot%3BAcc:F4I460]	None
AT1G04170	-0.0288726	0.662171	1	72.4712	2173.67	72.7011	2109	EIF2 GAMMA	Eukaryotic translation initiation factor 2 gamma subunit [Source:UniProtKB/TrEMBL%3BAcc:O64490]	None
AT1G04180	-0.000939633	0.997867	1	1.23351	28.6667	1.2466	28.3333	YUC9	Flavin-containing monooxygenase [Source:UniProtKB/TrEMBL%3BAcc:A0A178WB22]	None
AT1G04200	0.0984585	0.384976	1	11.1074	457.667	12.046	483.667	NA	Dyggve-melchior-clausen syndrome protein [Source:UniProtKB/TrEMBL%3BAcc:Q8RWV1]	None
AT1G04210	-0.0322016	0.686774	1	15.1247	1012	14.9864	989	NA	At1g04210 [Source:UniProtKB/TrEMBL%3BAcc:O64486]	None
AT1G04230	0.0653447	0.658663	1	7.4886	178.667	7.86153	186	NA	At1g04230 [Source:UniProtKB/TrEMBL%3BAcc:Q94K10]	None
AT1G04250	0.0217115	0.776276	1	75.204	1378	76.4754	1388.67	IAA17	Auxin-responsive protein IAA17 [Source:UniProtKB/Swiss-Prot%3BAcc:P93830]	None
AT1G04350	-0.044609	0.625319	1	58.6084	1027.33	57.3325	1001.33	NA	1-aminocyclopropane-1-carboxylate oxidase homolog 6 [Source:UniProtKB/Swiss-Prot%3BAcc:P93824]	None
AT1G04370	-1.65081	0.441113	1	0.197117	1	0.0469877	0.333333	ERF14	Uncharacterized protein At1g04370 (Fragment) [Source:UniProtKB/TrEMBL%3BAcc:C0SUS6]	None
AT1G04420	0.0107856	0.880512	1	81.275	2109	83.513	2105.67	NA	NAD(P)-linked oxidoreductase superfamily protein [Source:UniProtKB/TrEMBL%3BAcc:Q8VZ23]	None
AT1G04430	0.051235	0.485472	1	50.5069	2013.67	53.4028	2062.33	NA	Probable methyltransferase PMT8 [Source:UniProtKB/Swiss-Prot%3BAcc:Q940J9]	None
AT1G04440	0.0305345	0.706186	1	32.9437	1008	34.2649	1020.33	CKL13	Casein kinase 1-like protein 13 [Source:UniProtKB/Swiss-Prot%3BAcc:Q5XF24]	None
AT1G04445	-0.224565	0.845329	1	0.662506	3.33333	0.547773	3	NA	C2H2-like zinc finger protein [Source:TAIR%3BAcc:AT1G04445]	None
AT1G04480	-0.0517198	0.554046	1	581.704	3819	578.229	3604	RPL23A	60S ribosomal protein L23 [Source:UniProtKB/Swiss-Prot%3BAcc:P49690]	None
AT1G04510	-0.0205168	0.792886	1	34.4076	1157	34.1095	1128	PRP19A	Pre-mRNA-processing factor 19 homolog 1 [Source:UniProtKB/Swiss-Prot%3BAcc:Q94BR4]	None
AT1G04520	-0.163311	0.190212	1	15.0407	338.333	13.6597	301.333	CRRSP3	Cysteine-rich repeat secretory protein 3 [Source:UniProtKB/Swiss-Prot%3BAcc:Q6NM73]	None
AT1G04540	0.162264	0.58286	1	1.43542	41	1.61196	46.3333	NA	Calcium-dependent lipid-binding (CaLB domain) family protein [Source:UniProtKB/TrEMBL%3BAcc:F4I5P7]	None
AT1G04550	-0.133831	0.160156	1	29.4435	585.333	27.4719	531.333	IAA12	Auxin-responsive protein IAA12 [Source:UniProtKB/Swiss-Prot%3BAcc:Q38830]	None
AT1G04555	0.14625	0.514636	1	5.84937	76.3333	6.56963	84.3333	NA	Transmembrane protein [Source:UniProtKB/TrEMBL%3BAcc:Q1G3F4]	None
AT1G04600	0.0931921	0.8588	1	0.120817	12.3333	0.128012	13.3333	XI-A	Myosin-7 [Source:UniProtKB/Swiss-Prot%3BAcc:F4I5Q6]	None
AT1G04610	-0.178126	0.557156	1	1.4126	45	1.25994	39.6667	YUC3	Probable indole-3-pyruvate monooxygenase YUCCA3 [Source:UniProtKB/Swiss-Prot%3BAcc:O23024]	None
AT1G04635	0.143963	0.629849	1	5.04342	42.6667	5.73458	47	EMB1687	Probable ribonuclease P/MRP protein subunit POP5 [Source:UniProtKB/Swiss-Prot%3BAcc:Q6AWV1]	None
AT1G04640	0.00632563	0.946626	1	46.6567	621	47.5848	613.333	LIP2	LIP2 [Source:UniProtKB/TrEMBL%3BAcc:A0A178WI01]	None
AT1G04670	0.956431	0.792833	1	0	0	0.0297018	0.333333	NA	Putative uncharacterized protein [Source:UniProtKB/TrEMBL%3BAcc:Q5Q0I9]	None
AT1G04690	-0.0176617	0.803555	1	54.753	1308	55.2156	1278.33	KAB1	Probable voltage-gated potassium channel subunit beta [Source:UniProtKB/Swiss-Prot%3BAcc:O23016]	None
AT1G04700	-0.0248931	0.917077	1	0.967676	67	0.959738	66.3333	NA	PB1 domain-containing protein tyrosine kinase [Source:UniProtKB/TrEMBL%3BAcc:F4I5S1]	None
AT1G04710	-0.0237832	0.817101	1	15.5517	507	15.5417	495	KAT1	PKT4 [Source:UniProtKB/TrEMBL%3BAcc:A0A178W7T5]	None
AT1G04760	0.102706	0.818916	1	2.20578	19	2.42201	20	VAMP726	Putative vesicle-associated membrane protein 726 [Source:UniProtKB/Swiss-Prot%3BAcc:Q9MAS5]	None
AT1G04778	0.349701	0.718397	1	1.55332	3.33333	1.95277	4.33333	NA	unknown protein%3B FUNCTIONS IN: molecular_function unknown%3B INVOLVED IN: biological_process unknown%3B LOCATED IN: cellular_component unknown%3B Ha. [Source:TAIR%3BAcc:AT1G04778]	None
AT1G04790	0.162294	0.129645	1	9.76266	400.333	11.1204	444.333	NA	At1g04790 [Source:UniProtKB/TrEMBL%3BAcc:Q93XZ6]	None
AT1G04810	0.0420623	0.578048	1	21.0584	1328.67	21.9459	1358	RPN2B	26S proteasome non-ATPase regulatory subunit 1 homolog [Source:UniProtKB/TrEMBL%3BAcc:A0A178WEG0]	None
AT1G04900	-0.125513	0.409393	1	6.85378	200	6.44713	181	NA	Protein arginine methyltransferase NDUFAF7 [Source:UniProtKB/TrEMBL%3BAcc:A0A178WEZ0]	None
AT1G04940	-0.105608	0.210171	1	88.2116	1448.67	82.5889	1322	TIC20-I	Protein TIC 20-I%2C chloroplastic [Source:UniProtKB/Swiss-Prot%3BAcc:Q8GZ79]	None
AT1G04970	0.00316367	0.972523	1	22.5164	586.333	23.0325	581.667	NA	Putative BPI/LBP family protein At1g04970 [Source:UniProtKB/Swiss-Prot%3BAcc:Q9MAU5]	None
AT1G05000	-0.0280435	0.792192	1	37.1962	567.333	36.4271	557.333	NA	Phosphotyrosine protein phosphatases superfamily protein [Source:UniProtKB/TrEMBL%3BAcc:F4I780]	None
AT1G05080	-1.82342	0.614834	1	0.0381387	0.666667	0	0	NA	Putative FBD-associated F-box protein At1g05080 [Source:UniProtKB/Swiss-Prot%3BAcc:Q9ZVP2]	None
AT1G05090	-0.536106	0.1448	1	0.848399	29.6667	0.590652	20.6667	NA	dentin sialophosphoprotein-related [Source:TAIR%3BAcc:AT1G05090]	None
AT1G05100	0.0143983	0.975518	1	0.653079	17.3333	0.678561	17	MAPKKK18	Mitogen-activated protein kinase kinase kinase 18 [Source:UniProtKB/Swiss-Prot%3BAcc:Q9ZVP5]	None
AT1G05140	-0.00377039	0.963336	1	53.4658	1033	53.7367	1027.67	ARASP2	Probable membrane metalloprotease ARASP2%2C chloroplastic [Source:UniProtKB/Swiss-Prot%3BAcc:O23053]	None
AT1G05200	0.0208035	0.868817	1	8.13125	432.333	8.34754	442.333	GLR3.4	Glutamate receptor [Source:UniProtKB/TrEMBL%3BAcc:Q53YX3]	None
AT1G05210	-0.091552	0.651158	1	10.4376	99.3333	9.94402	91	NA	At1g05210 [Source:UniProtKB/TrEMBL%3BAcc:O23047]	None
AT1G05220	-0.393415	0.501731	1	2.08236	14	1.59705	11.3333	NA	Transmembrane protein 97%2C Putative [Source:UniProtKB/TrEMBL%3BAcc:O23046]	None
AT1G05260	-0.0232403	0.852109	1	53.6264	917.667	52.8184	896	PER3	Peroxidase [Source:UniProtKB/TrEMBL%3BAcc:Q0WSR2]	None
AT1G05320	0.0490721	0.592128	1	12.8868	636	14.0147	647.333	NA	FUNCTIONS IN: molecular_function unknown%3B INVOLVED IN: biological_process unknown%3B LOCATED IN: cellular_component unknown%3B EXPRESSED IN: fruit%2C egg cell%3B CONTAINS InterPro DOMAIN/s: Prefoldin (InterPro:IPR009053)%3B BEST Arabidopsis thaliana protein m /.../s: unknown protein (TAIR:AT2G32240.1)%3B Ha. [Source:TAIR%3BAcc:AT1G05320]	None
AT1G05330	-0.69079	0.825625	1	0.192007	0.666667	0.099538	0.333333	NA	YUP8H12.5 [Source:UniProtKB/TrEMBL%3BAcc:O23036]	None
AT1G05360	0.12949	0.442646	1	5.49346	125.333	6.04507	137	KMS2	Vacuole membrane protein KMS2 [Source:UniProtKB/Swiss-Prot%3BAcc:F4I8Q7]	None
AT1G05380	0.00399864	0.963366	1	10.6655	930	10.9385	932	NA	Acyl-CoA N-acyltransferase with RING/FYVE/PHD-type zinc finger protein [Source:UniProtKB/TrEMBL%3BAcc:Q9ZW00]	None
AT1G05400	-0.342987	0.521348	1	1.07745	14	0.892022	10.6667	NA	Putative uncharacterized protein [Source:UniProtKB/TrEMBL%3BAcc:Q5XVL8]	None
AT1G05420	-0.0982739	0.810521	1	4.37624	23	3.93085	21	ATOFP12	ovate family protein 12 [Source:TAIR%3BAcc:AT1G05420]	None
AT1G05450	0.158682	0.827936	1	0.805703	6	0.977183	6.66667	NA	Bifunctional inhibitor/lipid-transfer protein/seed storage 2S albumin superfamily protein [Source:UniProtKB/TrEMBL%3BAcc:Q1G2Y5]	None
AT1G05500	0.00466178	0.95318	1	27.3832	998.667	28.0253	987.667	SYT5	Synaptotagmin-5 [Source:UniProtKB/Swiss-Prot%3BAcc:Q8L706]	None
AT1G05510	-1.634	0.686909	1	0.033297	0.666667	0	0	OBAP1A	Oil body-associated protein 1A [Source:UniProtKB/Swiss-Prot%3BAcc:Q9ZVY7]	None
AT1G05540	0.239297	0.352626	1	3.71493	63	4.3678	75	NA	T25N20.19 [Source:UniProtKB/TrEMBL%3BAcc:Q9ZVY4]	None
AT1G05590	0.0705968	0.469341	1	10.6272	512	12.4671	535.333	HEXO2	Beta-hexosaminidase 2 [Source:UniProtKB/Swiss-Prot%3BAcc:Q9SYK0]	None
AT1G05620	-0.0798452	0.540098	1	17.7092	362.333	17.0051	336.667	URH2	Probable uridine nucleosidase 2 [Source:UniProtKB/Swiss-Prot%3BAcc:Q8LAC4]	None
AT1G05630	0.26952	0.0332668	1	3.6557	280	4.42301	339.667	AT5PTASE13	Endonuclease/exonuclease/phosphatase family protein [Source:TAIR%3BAcc:AT1G05630]	None
AT1G05690	-0.195861	0.291768	1	7.46341	179.667	6.58393	161	BT3	BTB/POZ and TAZ domain-containing protein 3 [Source:UniProtKB/Swiss-Prot%3BAcc:Q9SYL0]	None
AT1G05700	0.0284983	0.916392	1	1.75774	72.6667	1.81294	74.6667	NA	Leucine-rich repeat transmembrane protein kinase protein [Source:TAIR%3BAcc:AT1G05700]	None
AT1G05710	0.144597	0.563798	1	5.15724	61.6667	5.58189	68.6667	NA	AT1G05710	None
AT1G05730	0.208483	0.660726	1	0.913433	16.6667	1.08955	18.6667	NA	FAM136A-like protein (DUF842) [Source:UniProtKB/TrEMBL%3BAcc:Q5BQ23]	None
AT1G05740	-0.967129	0.776707	1	0.064284	0.333333	0	0	NA	F3F20.19 protein [Source:UniProtKB/TrEMBL%3BAcc:Q9SYL5]	None
AT1G05750	-0.112712	0.727956	1	1.19121	66.3333	1.10276	62	PDE247	Pentatricopeptide repeat-containing protein At1g05750%2C chloroplastic [Source:UniProtKB/Swiss-Prot%3BAcc:Q9MA50]	None
AT1G05780	0.241416	0.253745	1	11.2536	85.6667	13.607	99.3333	NA	Vacuolar ATPase assembly integral membrane protein VMA21 homolog [Source:UniProtKB/TrEMBL%3BAcc:Q58G56]	None
AT1G05785	-0.0622071	0.551345	1	20.4254	560.667	17.3355	532.333	NA	Got1/Sft2-like vescicle transport protein family [Source:TAIR%3BAcc:AT1G05785]	None
AT1G05805	0.050563	0.542351	1	47.5892	1049.67	50.8945	1074.33	BHLH128	Transcription factor bHLH128 [Source:UniProtKB/Swiss-Prot%3BAcc:Q8H102]	None
AT1G05830	-0.0322043	0.747909	1	11.1046	861	10.9068	849.667	ATX2	Histone-lysine N-methyltransferase ATX2 [Source:UniProtKB/Swiss-Prot%3BAcc:P0CB22]	None
AT1G05835	0.0478728	0.801899	1	16.2506	101.667	17.0955	104	NA	Uncharacterized protein At1g05835 [Source:UniProtKB/Swiss-Prot%3BAcc:A8MS78]	None
AT1G05860	0.0158003	0.910895	1	12.607	199.333	12.4451	199.667	NA	INO80 complex subunit D-like protein [Source:UniProtKB/TrEMBL%3BAcc:Q9MA40]	None
AT1G05880	0.0324674	0.992433	1	0.00912659	0.666667	0.0196988	0.666667	ARI12	Probable E3 ubiquitin-protein ligase ARI12 [Source:UniProtKB/Swiss-Prot%3BAcc:Q84RQ9]	None
AT1G05890	-0.0764851	0.326973	1	30.5148	1348	29.4544	1271	ARI5	RBR-type E3 ubiquitin transferase [Source:UniProtKB/TrEMBL%3BAcc:F4IAE4]	None
AT1G05894	-0.304215	0.681331	1	0.314104	7.33333	0.255711	6	NA	T20M3.17 protein [Source:UniProtKB/TrEMBL%3BAcc:Q9MA36]	None
AT1G05900	-0.00921818	0.938524	1	25.7506	532.667	25.4892	533.333	NTH2	Endonuclease III homolog [Source:UniProtKB/TrEMBL%3BAcc:A0A178W393]	None
AT1G05910	-0.0329484	0.739669	1	8.67111	701.333	8.6182	679.667	NA	ATPase family AAA domain-containing protein At1g05910 [Source:UniProtKB/Swiss-Prot%3BAcc:F4IAE9]	None
AT1G05990	0.504679	0.631609	1	0.304	3	0.429745	4.33333	CML7	Calmodulin-like protein 7 [Source:UniProtKB/Swiss-Prot%3BAcc:Q9LNE7]	None
AT1G06010	-0.19971	0.386532	1	13.1001	105	11.8009	87.3333	NA	Basic leucine zipper/W2 domain protein [Source:UniProtKB/TrEMBL%3BAcc:Q84R19]	None
AT1G06020	0.878581	0.80637	1	0.0195706	0.333333	0.04087	0.666667	NA	Probable fructokinase-3 [Source:UniProtKB/Swiss-Prot%3BAcc:Q9LNE4]	None
AT1G06030	1.84165	0.41194	1	0.0210412	0.333333	0.0848147	1.33333	NA	Probable fructokinase-2 [Source:UniProtKB/Swiss-Prot%3BAcc:Q9LNE3]	None
AT1G06060	0.00450057	0.97206	1	16.3558	256.333	16.6323	255.667	NA	At1g06060 [Source:UniProtKB/TrEMBL%3BAcc:Q9LNE1]	None
AT1G06080	-0.328402	0.182478	1	3.44285	72.6667	2.81782	56.3333	ADS1	Delta-9 acyl-lipid desaturase 1 [Source:UniProtKB/Swiss-Prot%3BAcc:O65797]	None
AT1G06090	0.10892	0.734113	1	13.7208	258.667	14.8776	271	NA	Delta-9 desaturase-like 1 protein [Source:UniProtKB/Swiss-Prot%3BAcc:Q9LND9]	None
AT1G06100	0.0967704	0.804187	1	2.59412	30.6667	2.74837	33.6667	NA	Delta-9 desaturase-like 2 protein [Source:UniProtKB/Swiss-Prot%3BAcc:Q9LND8]	None
AT1G06120	0.231271	0.363387	1	3.72328	67	4.39658	78	NA	Delta-9 desaturase-like 3 protein [Source:UniProtKB/Swiss-Prot%3BAcc:Q9FPD5]	None
AT1G06135	0.956433	0.752882	1	0	0	0.0578607	0.333333	NA	Transmembrane protein [Source:UniProtKB/TrEMBL%3BAcc:Q8LCX3]	None
AT1G06140	-0.149093	0.682516	1	1.12262	32.3333	1.05865	28.3333	PCMP-E61	Pentatricopeptide repeat-containing protein At1g06140%2C mitochondrial [Source:UniProtKB/Swiss-Prot%3BAcc:Q9LND4]	None
AT1G06160	0.343099	0.0735731	1	8.33438	121.667	10.8653	148.667	ERF094	Ethylene-responsive transcription factor ERF094 [Source:UniProtKB/Swiss-Prot%3BAcc:Q9LND1]	None
AT1G06180	-0.2095	0.285697	1	7.99825	111.333	7.14384	93.6667	ATMYB13	Transcription factor MYB13 [Source:UniProtKB/Swiss-Prot%3BAcc:Q9LNC9]	None
AT1G06210	0.038619	0.720427	1	14.2877	385.667	15.0673	393	TOL2	TOM1-like protein 2 [Source:UniProtKB/Swiss-Prot%3BAcc:Q9LNC6]	None
AT1G06220	0.00941966	0.899889	1	25.3053	1710.67	25.7424	1710.33	CLO	110 kDa U5 small nuclear ribonucleoprotein component CLO [Source:UniProtKB/Swiss-Prot%3BAcc:Q9LNC5]	None
AT1G06230	0.0606237	0.479259	1	16.0105	1035.67	17.0327	1074	GTE4	Transcription factor GTE4 [Source:UniProtKB/Swiss-Prot%3BAcc:Q9LNC4]	None
AT1G06240	-0.00827872	0.950996	1	13.4404	274	13.5683	267.667	NA	Uncharacterized protein At1g06240 [Source:UniProtKB/TrEMBL%3BAcc:Q8H109]	None
AT1G06260	-0.198971	0.695427	1	0.780325	14.3333	0.689851	12.3333	NA	Cysteine proteinases superfamily protein [Source:UniProtKB/TrEMBL%3BAcc:Q9LNC1]	None
AT1G06290	0.125859	0.156393	1	34.1135	1512.67	37.9849	1626	ACX3	Acyl-coenzyme A oxidase 3%2C peroxisomal [Source:UniProtKB/Swiss-Prot%3BAcc:P0CZ23]	None
AT1G06310	-0.336335	0.656158	1	0.159916	6	0.129923	4.66667	ACX3.2	Putative acyl-coenzyme A oxidase 3.2%2C peroxisomal [Source:UniProtKB/Swiss-Prot%3BAcc:Q9LMI7]	None
AT1G06320	-0.710888	0.716086	1	0.129686	1	0.0744597	0.666667	NA	Putative uncharacterized protein [Source:UniProtKB/TrEMBL%3BAcc:Q3EDH7]	None
AT1G06380	-0.130426	0.522867	1	8.85599	133.333	8.33589	118.667	NA	Ribosomal protein L1p/L10e family [Source:UniProtKB/TrEMBL%3BAcc:Q9LMI1]	None
AT1G06390	0.0269549	0.73919	1	38.9367	1038	40.2289	1053	ASK9	SK22 [Source:UniProtKB/TrEMBL%3BAcc:A0A178WCN5]	None
AT1G06410	-0.0181578	0.794735	1	60.4694	3989.33	61.1379	3916.67	TPS7	TPS7 [Source:UniProtKB/TrEMBL%3BAcc:A0A178WH64]	None
AT1G06420	0.247452	0.473343	1	1.53779	30.3333	1.8327	36.6667	NA	DNA ligase-like protein [Source:UniProtKB/TrEMBL%3BAcc:Q9LMH9]	None
AT1G06450	-0.067129	0.748887	1	5.36527	112.667	5.11935	106	CAF1-1	Probable CCR4-associated factor 1 homolog 1 [Source:UniProtKB/Swiss-Prot%3BAcc:Q9SHJ0]	None
AT1G06470	0.00343489	0.97813	1	12.2024	382	12.3954	379.667	NA	Probable sugar phosphate/phosphate translocator At1g06470 [Source:UniProtKB/Swiss-Prot%3BAcc:Q8H184]	None
AT1G06490	-0.423093	0.0407524	1	1.29388	142.333	0.971937	107.667	CALS7	Callose synthase 7 [Source:UniProtKB/Swiss-Prot%3BAcc:Q9SHJ3]	None
AT1G06500	0.103618	0.539778	1	11.9374	167.667	13.2759	176.667	NA	AT1G06500 protein [Source:UniProtKB/TrEMBL%3BAcc:Q8VY54]	None
AT1G06510	0.07673	0.526704	1	17.8961	316.333	19.1742	332.667	NA	Forkhead-associated domain protein [Source:UniProtKB/TrEMBL%3BAcc:Q84K72]	None
AT1G06530	-0.0309852	0.988724	1	1.52155	39.3333	1.53123	38.6667	PMD2	Peroxisomal and mitochondrial division factor 2 [Source:UniProtKB/Swiss-Prot%3BAcc:Q9SHJ6]	None
AT1G06560	-0.131649	0.310803	1	7.03691	263.667	6.50339	239.667	NA	At1g06560 [Source:UniProtKB/TrEMBL%3BAcc:Q84MA1]	None
AT1G06620	0.051184	0.788876	1	6.45736	146.667	6.77523	147.667	NA	1-aminocyclopropane-1-carboxylate oxidase homolog 1 [Source:UniProtKB/Swiss-Prot%3BAcc:Q84MB3]	None
AT1G06630	0.0304058	0.842617	1	8.20079	168	8.4473	171	NA	F-box/RNI-like superfamily protein [Source:UniProtKB/TrEMBL%3BAcc:F4IDP6]	None
AT1G06640	-0.101704	0.345832	1	41.8777	916.333	39.3537	856.333	NA	1-aminocyclopropane-1-carboxylate oxidase homolog 2 [Source:UniProtKB/Swiss-Prot%3BAcc:Q9C5K7]	None
AT1G06645	-0.0333714	0.654721	1	43.9958	1198	43.7836	1155.67	NA	2-oxoglutarate (2OG) and Fe(II)-dependent oxygenase superfamily protein [Source:TAIR%3BAcc:AT1G06645]	None
AT1G06670	0.0259605	0.752284	1	12.631	1352.33	13.0827	1379.67	NIH	DExH-box ATP-dependent RNA helicase DExH2 [Source:UniProtKB/Swiss-Prot%3BAcc:F4IDQ6]	None
AT1G06680	-0.0727083	0.178124	1	3434.6	62204.3	3299.04	58639	PSBP1	Oxygen-evolving enhancer protein 2-1%2C chloroplastic [Source:UniProtKB/Swiss-Prot%3BAcc:Q42029]	None
AT1G06730	-0.0365358	0.75954	1	9.45751	345.333	9.41686	334	NA	At1g06730/F4H5_22 [Source:UniProtKB/TrEMBL%3BAcc:Q9ASV2]	None
AT1G06750	-0.501694	0.422959	1	0.264079	11.3333	0.181239	8.66667	NA	p-loop containing nucleoside triphosphate hydrolases superfamily protein [Source:UniProtKB/TrEMBL%3BAcc:F4IDR5]	None
AT1G06780	0.230582	0.0749013	1	7.51837	295.667	8.92388	342	GAUT6	Hexosyltransferase [Source:UniProtKB/TrEMBL%3BAcc:F4IDS0]	None
AT1G06790	-0.00108343	0.995366	1	11.1071	146	11.6725	141.667	NA	F4H5.12 protein [Source:UniProtKB/TrEMBL%3BAcc:Q9M9Y6]	None
AT1G06830	0.0844352	0.645102	1	26.1897	122.333	28.017	128.333	GRXS11	Monothiol glutaredoxin-S11 [Source:UniProtKB/Swiss-Prot%3BAcc:Q9M9Y9]	None
AT1G06850	-0.0653413	0.659989	1	9.9221	178	9.51972	169	AtbZIP52	AtbZIP transcription factor [Source:UniProtKB/TrEMBL%3BAcc:Q8VWG0]	None
AT1G06870	-0.0399579	0.723285	1	15.7993	395.333	15.3911	384.667	TPP2	Probable thylakoidal processing peptidase 2%2C chloroplastic [Source:UniProtKB/Swiss-Prot%3BAcc:Q9M9Z2]	None
AT1G06910	0.053215	0.82857	1	2.7733	76	2.86906	79.6667	TRFL7	TRFL7 [Source:UniProtKB/TrEMBL%3BAcc:A0A178W486]	None
AT1G06923	-0.572942	0.456155	1	0.427059	8	0.283062	5.66667	NA	Transcription repressor OFP17-like protein [Source:UniProtKB/TrEMBL%3BAcc:Q1G3W7]	None
AT1G06930	-0.555369	0.355871	1	1.16067	11.6667	0.776306	8	NA	Expressed protein [Source:UniProtKB/TrEMBL%3BAcc:Q5BQ22]	None
AT1G06960	-0.0729475	0.596198	1	15.9802	213	15.4426	200	NA	U2 small nuclear ribonucleoprotein B'' 2 [Source:UniProtKB/Swiss-Prot%3BAcc:Q8H1S6]	None
AT1G06970	-0.817635	0.506298	1	0.10559	4.33333	0.0604286	2.33333	CHX14	CHX14 [Source:UniProtKB/TrEMBL%3BAcc:A0A178WC73]	None
AT1G06990	-0.967121	0.812647	1	0.0177261	0.333333	0	0	NA	GDSL esterase/lipase At1g06990 [Source:UniProtKB/Swiss-Prot%3BAcc:Q9LMJ3]	None
AT1G07010	0.0307208	0.684052	1	50.0311	1359	51.7188	1376.33	NA	Calcineurin-like metallo-phosphoesterase superfamily protein [Source:UniProtKB/TrEMBL%3BAcc:F4HNW0]	None
AT1G07070	-0.152531	0.22717	1	42.81	292.667	39.257	260	RPL35AA	60S ribosomal protein L35a-1 [Source:UniProtKB/Swiss-Prot%3BAcc:Q9LMK0]	None
AT1G07080	0.000432649	0.995769	1	98.0686	1709	98.942	1684.33	NA	At1g07080/F10K1_15 [Source:UniProtKB/TrEMBL%3BAcc:Q93VQ6]	None
AT1G07130	-0.123482	0.508774	1	9.831	135	9.04109	122	STN1	CST complex subunit STN1 [Source:UniProtKB/Swiss-Prot%3BAcc:Q9LMK5]	None
AT1G07170	0.141357	0.416914	1	22.2591	196	25.4637	208.667	NA	PHD finger-like domain-containing protein 5A [Source:UniProtKB/Swiss-Prot%3BAcc:P0DI19]	None
AT1G07175	0.907591	0.382768	1	1.11657	2.33333	2.5437	4	NA	unknown protein%3B FUNCTIONS IN: molecular_function unknown%3B INVOLVED IN: biological_process unknown%3B LOCATED IN: endomembrane system%3B BEST Arabidopsis thaliana protein match is: unknown protein (TAIR:AT2G29995.1)%3B Ha. [Source:TAIR%3BAcc:AT1G07175]	None
AT1G07180	-0.134232	0.235955	1	48.6423	1555.67	45.0194	1444.67	NDA1	Internal alternative NAD(P)H-ubiquinone oxidoreductase A1%2C mitochondrial [Source:UniProtKB/Swiss-Prot%3BAcc:Q8GWA1]	None
AT1G07210	-0.055845	0.600254	1	28.3475	552	27.8783	525	NA	F10K1.8 protein [Source:UniProtKB/TrEMBL%3BAcc:Q9LML3]	None
AT1G07240	0.0421323	0.629554	1	23.8211	682.667	24.5951	695.667	UGT71C5	UDP-glycosyltransferase 71C5 [Source:UniProtKB/Swiss-Prot%3BAcc:Q9FE68]	None
AT1G07250	-0.00368624	0.968432	1	25.5307	726.333	25.4194	725.333	UGT71C4	Flavonol 3-O-glucosyltransferase UGT71C4 [Source:UniProtKB/Swiss-Prot%3BAcc:Q9LML6]	None
AT1G07280	0.043234	0.614635	1	34.3818	1163	35.8916	1194.67	NA	At1g07280/F22G5_32 [Source:UniProtKB/TrEMBL%3BAcc:Q8VZC8]	None
AT1G07320	-0.0364105	0.62781	1	460.073	10810.7	459.076	10335.7	RPL4	RPL4 [Source:UniProtKB/TrEMBL%3BAcc:A0A384KN11]	None
AT1G07330	-1.3353	0.25182	1	0.114689	4	0.0431724	1.66667	NA	Dentin sialophosphoprotein [Source:UniProtKB/TrEMBL%3BAcc:Q9LNV2]	None
AT1G07370	-0.141581	0.28185	1	20.2918	328.667	18.7395	292.667	PCNA	Proliferating cellular nuclear antigen 1 [Source:UniProtKB/Swiss-Prot%3BAcc:Q9M7Q7]	None
AT1G07390	0.0481133	0.752375	1	4.18864	175.667	4.19818	178.667	AtRLP1	Receptor like protein 1 [Source:UniProtKB/TrEMBL%3BAcc:F4HQM4]	None
AT1G07410	-0.0388265	0.721522	1	26.8592	439	26.2494	422	RABA2B	RABA2b [Source:UniProtKB/TrEMBL%3BAcc:A0A178WHD5]	None
AT1G07460	1.67448	0.613436	1	0	0	0.071703	0.666667	NA	Concanavalin A-like lectin family protein [Source:UniProtKB/TrEMBL%3BAcc:Q9LNW6]	None
AT1G07470	0.092384	0.411871	1	11.7805	320.333	12.6548	339.333	NA	At1g07470/F22G5_13 [Source:UniProtKB/TrEMBL%3BAcc:Q93VP4]	None
AT1G07510	0.0476473	0.565918	1	24.4264	997.333	25.8684	1027.67	FTSH10	ATP-dependent zinc metalloprotease FTSH 10%2C mitochondrial [Source:UniProtKB/Swiss-Prot%3BAcc:Q8VZI8]	None
AT1G07560	0.138995	0.567098	1	1.60087	70.3333	1.77537	78.3333	NA	Probable LRR receptor-like serine/threonine-protein kinase At1g07560 [Source:UniProtKB/Swiss-Prot%3BAcc:C0LGD9]	None
AT1G07610	0.18704	0.100491	1	462.166	2554.33	544.852	2860	MT1C	Metallothionein-like protein 1C [Source:UniProtKB/Swiss-Prot%3BAcc:Q38804]	None
AT1G07630	0.0554823	0.615357	1	11.9672	458.667	12.6562	473	PLL5	PLL5 [Source:UniProtKB/TrEMBL%3BAcc:A0A178WGF5]	None
AT1G07660	-0.0845082	0.422119	1	96.9219	1003	93.8094	927.667	NA	Histone H4 [Source:UniProtKB/Swiss-Prot%3BAcc:P59259]	None
AT1G07700	-0.0101172	0.903091	1	57.2342	837.667	57.9924	825	NA	Thioredoxin superfamily protein [Source:TAIR%3BAcc:AT1G07700]	None
AT1G07705	0.00867398	0.930345	1	12.4781	480	12.6072	478.667	NA	NOT2 / NOT3 / NOT5 family [Source:UniProtKB/TrEMBL%3BAcc:A8MR45]	None
AT1G07790	-0.0748412	0.462758	1	137.763	1622.67	132.525	1510.67	HTB1	Histone H2B.1 [Source:UniProtKB/Swiss-Prot%3BAcc:Q9LQQ4]	None
AT1G07795	0.138315	0.735839	1	2.58915	19.6667	2.82036	21.6667	NA	At1g07795 [Source:UniProtKB/TrEMBL%3BAcc:Q29PW8]	None
AT1G07810	0.0622924	0.434941	1	17.0725	1161.33	18.0785	1206.67	ECA1	Calcium-transporting ATPase 1%2C endoplasmic reticulum-type [Source:UniProtKB/Swiss-Prot%3BAcc:P92939]	None
AT1G07830	-0.0593279	0.62069	1	31.6598	359	31.0007	336.333	NA	At1g07830/F24B9_7 [Source:UniProtKB/TrEMBL%3BAcc:Q94JQ7]	None
AT1G07840	-0.117891	0.249629	1	17.7947	430.333	16.7598	392	NA	AT1G07840 protein [Source:UniProtKB/TrEMBL%3BAcc:Q93ZQ9]	None
AT1G07890	0.0739775	0.255863	1	827.212	14331.3	865.436	14848.7	APX1	MEE6 [Source:UniProtKB/TrEMBL%3BAcc:A0A178W5I1]	None
AT1G07900	0.00947121	0.930944	1	5.41369	423	5.41297	427.333	LBD1	LBD1 [Source:UniProtKB/TrEMBL%3BAcc:A0A178WM56]	None
AT1G07920	-0.0419484	0.491515	1	223.925	6689	218.017	6471.67	A1	Elongation factor 1-alpha 4 [Source:UniProtKB/Swiss-Prot%3BAcc:Q8GTY0]	None
AT1G07930	-0.018844	0.765589	1	406.581	12394.7	403.583	11969.7	A1	Elongation factor 1-alpha 4 [Source:UniProtKB/Swiss-Prot%3BAcc:Q8GTY0]	None
AT1G07960	-0.0516997	0.663217	1	22.8354	304	22.672	293	PDIL5-1	PDIL5-1 [Source:UniProtKB/TrEMBL%3BAcc:A0A178WDX4]	None
AT1G07985	0.484887	0.216276	1	2.20615	25.6667	3.23051	34.6667	NA	Expressed protein [Source:UniProtKB/TrEMBL%3BAcc:Q3EDG6]	None
AT1G07990	0.0207811	0.794889	1	17.213	921.667	17.7714	931.667	NA	At1g07990/T6D22_5 [Source:UniProtKB/TrEMBL%3BAcc:Q8L7T5]	None
AT1G08035	-1.97247	0.411031	1	0.152157	0.666667	0	0	SMR16	Cyclin-dependent protein kinase inhibitor SMR16 [Source:UniProtKB/Swiss-Prot%3BAcc:Q9LN05]	None
AT1G08090	0.721193	0.282182	1	0.198526	7.66667	0.333003	12.3333	NRT2.1	High-affinity nitrate transporter 2.1 [Source:UniProtKB/Swiss-Prot%3BAcc:O82811]	None
AT1G08110	-0.0683129	0.320597	1	100.019	1580	96.7469	1497.67	NA	Lactoylglutathione lyase [Source:UniProtKB/TrEMBL%3BAcc:B9DH52]	None
AT1G08120	-1.19031	0.596693	1	0.0853476	1.66667	0.039662	0.666667	NA	TP53-regulating kinase-like protein [Source:UniProtKB/TrEMBL%3BAcc:Q5Q0I2]	None
AT1G08190	0.0814896	0.257732	1	32.0727	2338.67	34.5638	2448.67	VPS41	Vacuolar protein sorting-associated protein 41 homolog [Source:UniProtKB/Swiss-Prot%3BAcc:P93043]	None
AT1G08260	0.144629	0.221261	1	3.42211	439.667	3.86803	485	POL2A	DNA polymerase epsilon catalytic subunit A [Source:UniProtKB/Swiss-Prot%3BAcc:F4HW04]	None
AT1G08280	-0.0204056	0.896988	1	8.55313	177.667	8.61105	174	GALT29A	Beta-1%2C6-galactosyltransferase GALT29A [Source:UniProtKB/Swiss-Prot%3BAcc:Q9SGD2]	None
AT1G08300	0.0944639	0.53893	1	5.63349	189.333	5.50255	201.667	NVL	No vein-like protein [Source:UniProtKB/TrEMBL%3BAcc:F4HW09]	None
AT1G08340	0.109137	0.561106	1	4.07442	116.667	4.56213	122.667	ROPGAP5	Rho GTPase-activating protein 5 [Source:UniProtKB/Swiss-Prot%3BAcc:Q6NKT5]	None
AT1G08360	-0.0577004	0.456616	1	308.592	4325.67	303.625	4079.67	RPL10AA	60S ribosomal protein L10a-1 [Source:UniProtKB/Swiss-Prot%3BAcc:Q8VZB9]	None
AT1G08370	0.0216943	0.822886	1	27.4026	538.667	27.5304	545.333	DCP1	mRNA-decapping enzyme-like protein [Source:UniProtKB/Swiss-Prot%3BAcc:Q9SJF3]	None
AT1G08390	-0.0520044	0.812699	1	11.7861	87.3333	11.2719	84.3333	NA	RecQ-mediated instability-like protein [Source:UniProtKB/TrEMBL%3BAcc:Q8RX36]	None
AT1G08410	0.0456055	0.709101	1	8.4652	333	8.83199	344.333	LSG1-2	GTPase LSG1-2 [Source:UniProtKB/Swiss-Prot%3BAcc:Q9SJF1]	None
AT1G08420	0.0512671	0.5732	1	18.5921	1483.67	19.3869	1527	BSL2	Serine/threonine-protein phosphatase BSL2 [Source:UniProtKB/Swiss-Prot%3BAcc:Q9SJF0]	None
AT1G08430	0.10361	0.468787	1	12.3931	342	13.4981	364.667	ALMT1	Aluminum-activated malate transporter 1 [Source:UniProtKB/Swiss-Prot%3BAcc:Q9SJE9]	None
AT1G08440	1.09988	0.421685	1	0.0638222	1.33333	0.121507	3.33333	ALMT2	Aluminum-activated malate transporter 2 [Source:UniProtKB/Swiss-Prot%3BAcc:Q9SJE8]	None
AT1G08460	0.168099	0.121092	1	13.2049	331	14.8507	370.667	HDA8	Histone deacetylase 8 [Source:UniProtKB/Swiss-Prot%3BAcc:Q94EJ2]	None
AT1G08465	0.148357	0.340485	1	11.6599	175.667	12.9821	196	YAB2	Putative axial regulator YABBY 2 [Source:UniProtKB/Swiss-Prot%3BAcc:Q9XFB0]	None
AT1G08480	-0.0288393	0.745209	1	115.3	1231	113.697	1189.33	SDH6	Succinate dehydrogenase subunit 6%2C mitochondrial [Source:UniProtKB/Swiss-Prot%3BAcc:Q941A6]	None
AT1G08500	0.222336	0.188899	1	11.0076	133	13.1276	152	ENODL18	Early nodulin-like protein 18 [Source:UniProtKB/TrEMBL%3BAcc:O82083]	None
AT1G08520	0.00592867	0.934086	1	101.65	5143	103.917	5117.33	CHLD	Mg-protoporphyrin IX chelatase [Source:UniProtKB/TrEMBL%3BAcc:A0A178W355]	None
AT1G08530	-0.012986	0.93685	1	13.6619	157.667	13.5968	154	NA	Chitinase-like protein [Source:UniProtKB/TrEMBL%3BAcc:Q0WNC2]	None
AT1G08540	-0.046182	0.516692	1	37.0024	1338.67	36.607	1287.33	SIGB	RNA polymerase sigma factor sigB [Source:UniProtKB/Swiss-Prot%3BAcc:O22056]	None
AT1G08550	-0.0644463	0.427036	1	39.5988	1297	38.889	1227.67	VDE1	NPQ1 [Source:UniProtKB/TrEMBL%3BAcc:A0A384K8V4]	None
AT1G08570	0.0611225	0.395688	1	82.7083	1674.33	86.983	1747	ACHT4	Thioredoxin-like 1-1%2C chloroplastic [Source:UniProtKB/Swiss-Prot%3BAcc:O64654]	None
AT1G08590	-0.0778006	0.536539	1	5.77251	323	5.4783	308.667	PXL1	Leucine-rich repeat receptor-like protein kinase PXL1 [Source:UniProtKB/Swiss-Prot%3BAcc:Q9FRS6]	None
AT1G08600	-0.0660766	0.544404	1	7.28306	771.333	7.14504	737	ATRX	CHR20 [Source:UniProtKB/TrEMBL%3BAcc:A0A178VZQ9]	None
AT1G08620	0.0341146	0.716247	1	7.87104	686.333	8.22864	699.667	PKDM7D	Transcription factor jumonji (jmj) family protein / zinc finger (C5HC2 type) family protein [Source:TAIR%3BAcc:AT1G08620]	None
AT1G08650	0.104829	0.351144	1	15.1299	311.333	15.6442	332.333	PPCK1	Phosphoenolpyruvate carboxylase kinase 1 [Source:UniProtKB/Swiss-Prot%3BAcc:Q9SPK4]	None
AT1G08680	-0.0571546	0.519304	1	18.2257	836.333	17.5738	795	ZIGA4	ARF GAP-like zinc finger-containing protein ZIGA4 [Source:UniProtKB/TrEMBL%3BAcc:F4HXP0]	None
AT1G08710	0.082287	0.609031	1	7.78001	149.667	8.16914	158.667	SKIP24	F-box protein SKIP24 [Source:UniProtKB/Swiss-Prot%3BAcc:Q9CAZ0]	None
AT1G08720	0.119048	0.238845	1	7.07838	413.667	7.81608	445.667	EDR1	Serine/threonine-protein kinase EDR1 [Source:UniProtKB/Swiss-Prot%3BAcc:Q9FPR3]	None
AT1G08730	-0.52164	0.227168	1	0.338818	28.3333	0.237059	20.3333	XI-C	Myosin-9 [Source:UniProtKB/Swiss-Prot%3BAcc:F4HXP9]	None
AT1G08750	-0.0981555	0.484037	1	10.5459	209	9.96608	195	NA	Peptidase C13 family [Source:UniProtKB/TrEMBL%3BAcc:Q8GYI6]	None
AT1G08760	0.0471755	0.67236	1	7.96113	379.333	8.36151	387.667	NA	At1g08760 [Source:UniProtKB/TrEMBL%3BAcc:Q9FRR2]	None
AT1G08770	-0.174378	0.141241	1	33.8113	384	30.1828	334	PRA1E	PRA1 family protein [Source:UniProtKB/TrEMBL%3BAcc:A0A178W4Z3]	None
AT1G08830	-0.0446304	0.896862	1	78.6037	1002	76.374	1020.67	CSD1	Superoxide dismutase [Cu-Zn] 1 [Source:UniProtKB/Swiss-Prot%3BAcc:P24704]	None
AT1G08845	0.0226386	0.91899	1	9.1441	95	9.41577	94	NA	Ribosomal L18p/L5e family protein [Source:UniProtKB/TrEMBL%3BAcc:F4HXR7]	None
AT1G08860	-0.501144	0.718799	1	0.0819129	2.66667	0.0636875	1.66667	BON3	Protein BONZAI 3 [Source:UniProtKB/Swiss-Prot%3BAcc:Q5XQC7]	None
AT1G08890	0.0377575	0.709106	1	25.2794	623.667	26.3134	627	SUGTL4	Sugar transporter ERD6-like 1 [Source:UniProtKB/Swiss-Prot%3BAcc:Q9SCW7]	None
AT1G08910	-0.0361744	0.762137	1	7.46909	384.667	7.42098	378	NA	zinc ion binding%3Bzinc ion binding [Source:TAIR%3BAcc:AT1G08910]	None
AT1G08920	0.0594941	0.659229	1	11.2352	343.333	11.9258	357.333	ESL1	ERD (early response to dehydration) six-like 1 [Source:TAIR%3BAcc:AT1G08920]	None
AT1G08930	0.0924352	0.231093	1	99.9842	3281	108.604	3458	ERD6	ERD6 [Source:UniProtKB/TrEMBL%3BAcc:A0A178W9Q9]	None
AT1G08940	0.135911	0.372796	1	10.8723	212.667	12.1208	234.333	NA	Phosphoglycerate mutase-like protein AT74H [Source:UniProtKB/Swiss-Prot%3BAcc:O04035]	None
AT1G08960	0.0313954	0.815433	1	9.00222	251.333	9.19841	255.667	CCX5	CCX5 [Source:UniProtKB/TrEMBL%3BAcc:A0A178W3U3]	None
AT1G08970	-0.0641659	0.526405	1	30.5798	630.333	29.548	596.333	NFYC9	Nuclear transcription factor Y subunit C-9 [Source:UniProtKB/Swiss-Prot%3BAcc:Q8L4B2]	None
AT1G08980	0.0894532	0.30393	1	45.4272	1057.67	48.6358	1113.67	AMI1	Amidase 1 [Source:UniProtKB/Swiss-Prot%3BAcc:Q9FR37]	None
AT1G08990	0.206687	0.278353	1	4.05328	143.333	4.77378	164.667	GUX5	Putative UDP-glucuronate:xylan alpha-glucuronosyltransferase 5 [Source:UniProtKB/Swiss-Prot%3BAcc:F4HZC3]	None
AT1G09000	0.133897	0.502474	1	2.55976	99.3333	2.82768	109.333	ANP1	Mitogen-activated protein kinase kinase kinase ANP1 [Source:UniProtKB/Swiss-Prot%3BAcc:O22040]	None
AT1G09040	0.0609281	0.723142	1	2.99136	159.333	3.16143	168	NA	unknown protein%3B FUNCTIONS IN: molecular_function unknown%3B INVOLVED IN: biological_process unknown%3B LOCATED IN: membrane%3B EXPRESSED IN: leaf%3B BEST Arabidopsis thaliana protein match is: unknown protein (TAIR:AT1G09050.1)%3B Ha. [Source:TAIR%3BAcc:AT1G09040]	None
AT1G09070	0.0769607	0.439907	1	88.4177	2102.67	92.4755	2216.67	SRC2	Protein SRC2 homolog [Source:UniProtKB/Swiss-Prot%3BAcc:O04023]	None
AT1G09090	0.287373	0.137509	1	3.16303	151.333	3.87694	188.333	RBOHB	Respiratory burst oxidase homolog protein B [Source:UniProtKB/Swiss-Prot%3BAcc:Q9SBI0]	None
AT1G09150	-0.0612871	0.540178	1	32.6435	525.667	31.4546	497	NA	Pseudouridine synthase and archaeosine transglycosylase (PUA) domain-containing protein [Source:UniProtKB/TrEMBL%3BAcc:Q8L7N2]	None
AT1G09176	-0.164364	0.878205	1	0.75211	3.66667	0.658831	3.66667	NA	T12M4.13 protein [Source:UniProtKB/TrEMBL%3BAcc:O80490]	None
AT1G09180	0.565958	0.424061	1	0.72333	6.33333	1.08353	9.33333	ATSAR1	Putative GTP-binding protein%2C SAR1B [Source:UniProtKB/TrEMBL%3BAcc:O80489]	None
AT1G09240	0.311627	0.100995	1	14.2151	216	17.9992	263	NAS3	Nicotianamine synthase 3 [Source:UniProtKB/Swiss-Prot%3BAcc:O80483]	None
AT1G09250	0.0125806	0.903441	1	25.4594	471.667	26.113	470.333	BHLH149	Transcription factor bHLH149 [Source:UniProtKB/Swiss-Prot%3BAcc:O80482]	None
AT1G09270	0.011132	0.882269	1	37.0509	1510.67	37.8539	1508	IMPA4	Importin subunit alpha-4 [Source:UniProtKB/Swiss-Prot%3BAcc:O80480]	None
AT1G09300	-0.0768694	0.619522	1	6.36517	193.333	6.1069	180.667	ICP55	Intermediate cleaving peptidase 55%2C mitochondrial [Source:UniProtKB/Swiss-Prot%3BAcc:F4HZG9]	None
AT1G09310	-0.00532257	0.935986	1	1676.74	25080.3	1692.5	24515	NA	T31J12.3 protein [Source:UniProtKB/TrEMBL%3BAcc:Q9ZPZ4]	None
AT1G09340	-0.0112971	0.8672	1	812.349	19966	812.813	19805.3	CRB	chloroplast RNA binding [Source:TAIR%3BAcc:AT1G09340]	None
AT1G09350	-1.96854	0.0420137	1	0.237992	5.33333	0.0632624	1.33333	GOLS3	Hexosyltransferase (Fragment) [Source:UniProtKB/TrEMBL%3BAcc:W8PVD7]	None
AT1G09370	1.42844	0.61924	1	0.0801247	0.333333	0.176985	1	NA	Plant invertase/pectin methylesterase inhibitor superfamily protein [Source:TAIR%3BAcc:AT1G09370]	None
AT1G09390	-0.0672985	0.663085	1	10.7375	221	10.3009	208.667	NA	GDSL esterase/lipase At1g09390 [Source:UniProtKB/Swiss-Prot%3BAcc:O80522]	None
AT1G09410	0.0887556	0.907201	1	0.15428	6.33333	0.167715	6.66667	PCMP-H18	Pentatricopeptide repeat-containing protein At1g09410%2C mitochondrial [Source:UniProtKB/Swiss-Prot%3BAcc:Q56XI1]	None
AT1G09430	0.134605	0.0862652	1	39.3312	1305.67	44.4257	1409.33	ACLA-3	ATP-citrate synthase alpha chain protein 3 [Source:UniProtKB/Swiss-Prot%3BAcc:O80526]	None
AT1G09450	0.211838	0.434248	1	1.42671	52.3333	1.6549	61.3333	HASPIN	Serine/threonine-protein kinase haspin homolog [Source:UniProtKB/Swiss-Prot%3BAcc:O80528]	None
AT1G09460	-0.0140085	0.926212	1	11.8881	207	11.9064	202.667	NA	Carbohydrate-binding X8 domain superfamily protein [Source:UniProtKB/TrEMBL%3BAcc:F4I0Z2]	None
AT1G09480	-0.0969165	0.818229	1	1.24702	24.6667	1.24005	22.6667	NA	NAD(P)-binding Rossmann-fold superfamily protein [Source:UniProtKB/TrEMBL%3BAcc:F4I0Z5]	None
AT1G09490	-0.0721261	0.543488	1	19.1988	318.333	18.5757	301.333	NA	At1g09490/F14J9_15 [Source:UniProtKB/TrEMBL%3BAcc:O80532]	None
AT1G09500	-0.25647	0.815417	1	0.212739	4.33333	0.201232	4	NA	At1g09500/F14J9_16 [Source:UniProtKB/TrEMBL%3BAcc:O80533]	None
AT1G09530	-0.00749752	0.931951	1	23.6001	747	23.6995	740.667	PIF3	Transcription factor PIF3 [Source:UniProtKB/Swiss-Prot%3BAcc:O80536]	None
AT1G09540	-0.311446	0.338145	1	1.87617	41	1.52844	32.6667	MYB61	MYB61 [Source:UniProtKB/TrEMBL%3BAcc:A0A178WLE4]	None
AT1G09560	0.070382	0.743077	1	135.938	1181.33	140.176	1215.67	GLP4	Germin-like protein subfamily 2 member 1 [Source:UniProtKB/Swiss-Prot%3BAcc:P94014]	None
AT1G09580	-0.126812	0.316427	1	17.3708	280	16.2784	251.667	NA	Transmembrane emp24 domain-containing protein p24delta3 [Source:UniProtKB/Swiss-Prot%3BAcc:Q6IDL4]	None
AT1G09590	-0.0839858	0.356833	1	341.816	4002.33	328.833	3696	RPL21A	60S ribosomal protein L21-1 [Source:UniProtKB/Swiss-Prot%3BAcc:Q43291]	None
AT1G09600	-0.0820778	0.808824	1	0.943182	36.3333	0.901227	34.3333	NA	Probable serine/threonine-protein kinase At1g09600 [Source:UniProtKB/Swiss-Prot%3BAcc:F4I114]	None
AT1G09610	0.351122	0.486468	1	0.688228	13	0.880174	16.6667	GXM1	GXM3 [Source:UniProtKB/TrEMBL%3BAcc:A0A178W7U8]	None
AT1G09640	-0.0284444	0.626668	1	157.522	4495.33	155.367	4353.67	NA	Probable elongation factor 1-gamma 1 [Source:UniProtKB/Swiss-Prot%3BAcc:O04487]	None
AT1G09645	0.177278	0.213407	1	27.9839	257.667	32.4574	286.667	NA	At1g09645 [Source:UniProtKB/TrEMBL%3BAcc:Q6GKX8]	None
AT1G09650	0.861024	0.175283	1	0.349194	7.33333	0.651883	12.6667	NA	F-box/LRR-repeat/kelch-repeat protein At1g09650 [Source:UniProtKB/Swiss-Prot%3BAcc:O04488]	None
AT1G09665	0	1	1	0	0	0	0	NA	Toll-Interleukin-Resistance (TIR) domain family protein [Source:UniProtKB/TrEMBL%3BAcc:Q3EDF9]	None
AT1G09710	0.211154	0.205907	1	3.53676	128.333	4.12484	147.667	NA	Homeodomain-like superfamily protein [Source:UniProtKB/TrEMBL%3BAcc:F4I129]	None
AT1G09740	0.166405	0.173503	1	60.8904	798	68.7798	880.333	NA	Adenine nucleotide alpha hydrolases-like superfamily protein [Source:UniProtKB/TrEMBL%3BAcc:Q84TF6]	None
AT1G09750	-0.123514	0.190941	1	285.21	5897	254.776	5326.67	AED3	Aspartyl protease AED3 [Source:UniProtKB/Swiss-Prot%3BAcc:O04496]	None
AT1G09770	0.0366334	0.593128	1	32.1854	2056	33.9845	2099	CDC5	Cell division cycle 5-like protein [Source:UniProtKB/Swiss-Prot%3BAcc:P92948]	None
AT1G09794	-0.216741	0.393541	1	11.0602	58.6667	9.76347	50.3333	NA	Cox19 family protein (CHCH motif) [Source:UniProtKB/TrEMBL%3BAcc:F4I2K8]	None
AT1G09795	0.0460114	0.582181	1	50.8103	1320.67	53.4872	1349.67	HISN1B	ATP phosphoribosyltransferase 2%2C chloroplastic [Source:UniProtKB/Swiss-Prot%3BAcc:Q8GSJ1]	None
AT1G09812	-0.851534	0.178519	1	3.23249	10.6667	1.8152	6	NA	Multidrug resistance protein [Source:UniProtKB/TrEMBL%3BAcc:Q5Q0I0]	None
AT1G09815	-0.226437	0.161611	1	17.6805	184	15.405	154.333	POLD4	POLD4 [Source:UniProtKB/TrEMBL%3BAcc:A0A178WHS7]	None
AT1G09850	0.129734	0.191936	1	17.8962	474	19.898	516.667	XBCP3	At1g09850 [Source:UniProtKB/TrEMBL%3BAcc:Q0WVJ5]	None
AT1G09870	0.0446224	0.640988	1	17.402	521	18.3131	531	NA	At1g09870/F21M12_26 [Source:UniProtKB/TrEMBL%3BAcc:Q941B2]	None
AT1G09900	-0.0456528	0.754341	1	6.95973	228	6.94145	219.333	NA	Pentatricopeptide repeat-containing protein At1g09900 [Source:UniProtKB/Swiss-Prot%3BAcc:Q3EDF8]	None
AT1G09960	0.117257	0.466456	1	4.54993	152.667	4.95004	165.667	SUC4	Sucrose transport protein SUC4 [Source:UniProtKB/Swiss-Prot%3BAcc:Q9FE59]	None
AT1G09970	0.157004	0.0568525	1	69.4988	4078	78.9128	4513.67	LRR XI-23	Receptor-like protein kinase 7 [Source:UniProtKB/Swiss-Prot%3BAcc:F4I2N7]	None
AT1G10010	-0.786067	0.778912	1	0.0255176	0.666667	0.0171776	0.333333	AAP8	amino acid permease 8 [Source:TAIR%3BAcc:AT1G10010]	None
AT1G10030	0.0140128	0.917196	1	25.8157	228.667	26.5353	228.333	ERG28	Ergosterol biosynthetic protein 28 [Source:UniProtKB/Swiss-Prot%3BAcc:O80594]	None
AT1G10050	-0.0254229	0.84867	1	5.15814	330	5.16241	323.667	NA	glycosyl hydrolase family 10 protein / carbohydrate-binding domain-containing protein [Source:TAIR%3BAcc:AT1G10050]	None
AT1G10060	0.00559636	0.959679	1	14.8134	410.333	15.1346	407.333	ATBCAT-1	branched-chain amino acid transaminase 1 [Source:TAIR%3BAcc:AT1G10060]	None
AT1G10070	0.0973263	0.743466	1	1.55046	44.3333	1.77686	45	BCAT2	Branched-chain-amino-acid aminotransferase 2%2C chloroplastic [Source:UniProtKB/Swiss-Prot%3BAcc:Q9M439]	None
AT1G10110	-0.0992679	0.930468	1	0.119937	2.66667	0.119539	2.33333	NA	F-box protein At1g10110 [Source:UniProtKB/Swiss-Prot%3BAcc:O80603]	None
AT1G10130	0.00647909	0.948574	1	13.9229	902.333	14.1878	906.333	ECA3	Calcium-transporting ATPase 3%2C endoplasmic reticulum-type [Source:UniProtKB/Swiss-Prot%3BAcc:Q9SY55]	None
AT1G10150	-0.0628984	0.645851	1	10.6542	272.333	10.471	259.667	PP2A10	Protein PHLOEM PROTEIN 2-LIKE A10 [Source:UniProtKB/Swiss-Prot%3BAcc:Q9SY57]	None
AT1G10210	0.0870796	0.637714	1	5.60031	118.667	5.77675	127	MPK1	MPK1 [Source:UniProtKB/TrEMBL%3BAcc:A0A178W6I4]	None
AT1G10220	-0.929327	0.653331	1	0.136758	1.33333	0.058136	0.666667	NA	BEST Arabidopsis thaliana protein match is: ZCF37 (TAIR:AT1G59590.1)%3B Ha. [Source:TAIR%3BAcc:AT1G10220]	None
AT1G10230	0.059923	0.725388	1	17.1137	195	18.1571	201.667	ASK18	SKP1-like protein 18 [Source:UniProtKB/Swiss-Prot%3BAcc:Q9SY65]	None
AT1G10270	-0.0156688	0.881363	1	7.90169	449.667	7.85421	439.667	GRP23	Pentatricopeptide repeat-containing protein At1g10270 [Source:UniProtKB/Swiss-Prot%3BAcc:Q9SY69]	None
AT1G10290	0.0483757	0.53144	1	27.3652	1813.67	28.65	1848	DRP2A	DRP2A [Source:UniProtKB/TrEMBL%3BAcc:A0A178WBB3]	None
AT1G10300	-0.385048	0.522924	1	0.262482	9.66667	0.210716	7.33333	NA	Nucleolar GTP-binding protein 1 [Source:UniProtKB/TrEMBL%3BAcc:F4I4A6]	None
AT1G10330	-0.19894	0.579821	1	1.66103	32	1.48285	27.6667	PCMP-E71	Putative pentatricopeptide repeat-containing protein At1g10330 [Source:UniProtKB/Swiss-Prot%3BAcc:Q9SY75]	None
AT1G10380	-0.205797	0.0912954	1	19.7178	296.667	16.8913	254	NA	At1g10380/F14N23_32 [Source:UniProtKB/TrEMBL%3BAcc:Q93ZB0]	None
AT1G10385	0.0542539	0.966581	1	0.0610528	2	0.0583559	2.33333	EXO84A	Exocyst complex component EXO84A [Source:UniProtKB/Swiss-Prot%3BAcc:F4I4B6]	None
AT1G10450	-0.0481504	0.679614	1	6.67345	502.667	6.57339	491.667	SNL6	Paired amphipathic helix protein Sin3-like 6 [Source:UniProtKB/Swiss-Prot%3BAcc:Q9XIK6]	None
AT1G10480	-0.0341328	0.894891	1	2.40449	55.6667	2.40651	54	ZFP5	Zinc finger protein 5 [Source:UniProtKB/Swiss-Prot%3BAcc:Q39264]	None
AT1G10490	-0.115526	0.304854	1	7.43692	461	7.01069	424.667	NA	RNA cytidine acetyltransferase 1 [Source:UniProtKB/Swiss-Prot%3BAcc:Q9XIK4]	None
AT1G10510	0.0308913	0.716774	1	28.0232	1033	29.1786	1046	emb2004	RNI-like superfamily protein [Source:UniProtKB/TrEMBL%3BAcc:Q93ZV8]	None
AT1G10520	0.669543	0.106561	1	0.64215	19.6667	1.06736	30	POLL	DNA polymerase lambda [Source:UniProtKB/Swiss-Prot%3BAcc:Q9FNY4]	None
AT1G10522	-0.120399	0.463766	1	41.4127	496	37.4708	446	PRIN2	Protein PLASTID REDOX INSENSITIVE 2%2C chloroplastic [Source:UniProtKB/Swiss-Prot%3BAcc:Q9XIK0]	None
AT1G10560	0.170971	0.695547	1	0.362217	16.6667	0.424161	18.3333	PUB18	U-box domain-containing protein 18 [Source:UniProtKB/Swiss-Prot%3BAcc:Q9XIJ5]	None
AT1G10570	0.149151	0.216909	1	7.77088	280.333	8.80031	308.333	ULP1C	Ubiquitin-like-specific protease 1C [Source:UniProtKB/Swiss-Prot%3BAcc:Q8RWN0]	None
AT1G10588	0	1	1	0	0	0	0	NA	Gibberellin-regulated family protein [Source:UniProtKB/TrEMBL%3BAcc:Q1G2Y4]	None
AT1G10600	-0.0762327	0.506264	1	17.9745	383.667	17.089	364.333	AMSH2	AMSH2 [Source:UniProtKB/TrEMBL%3BAcc:A0A178W3T5]	None
AT1G10657	0.215594	0.233167	1	11.5507	121.667	13.5462	141.667	NA	Transmembrane protein [Source:UniProtKB/TrEMBL%3BAcc:Q0WR17]	None
AT1G10660	-0.00409657	0.96623	1	27.3073	639	27.5162	630.667	NA	AT1G10660 protein [Source:UniProtKB/TrEMBL%3BAcc:Q8H101]	None
AT1G10670	0.0244719	0.647409	1	166.561	5172.33	173.788	5224.33	ACLA-1	ATP-citrate lyase A-1 [Source:UniProtKB/TrEMBL%3BAcc:F4I5V8]	None
AT1G10700	0.0138975	0.894437	1	17.3736	398.333	17.7314	396.667	PRS3	Ribose-phosphate pyrophosphokinase 3%2C chloroplastic [Source:UniProtKB/Swiss-Prot%3BAcc:Q93Z66]	None
AT1G10710	-1.10787	0.350566	1	0.158004	3.66667	0.0728136	1.66667	PHS1	Protein POOR HOMOLOGOUS SYNAPSIS 1 [Source:UniProtKB/Swiss-Prot%3BAcc:Q45GQ7]	None
AT1G10720	-0.0838939	0.447516	1	14.9397	383	14.4989	360	NA	BSD domain-containing protein [Source:UniProtKB/TrEMBL%3BAcc:Q9SAD0]	None
AT1G10730	-0.146961	0.42793	1	5.24449	116.333	4.79284	105.333	AP1M1	AP-1 complex subunit mu-1 [Source:UniProtKB/Swiss-Prot%3BAcc:Q9SAC9]	None
AT1G10790	-0.237425	0.683946	1	0.88283	10.6667	0.785192	8.66667	NA	F20B24.21 [Source:UniProtKB/TrEMBL%3BAcc:Q9S701]	None
AT1G10810	-0.0907465	0.842081	1	0.755835	17.3333	0.702206	16.6667	NA	Probable aldo-keto reductase 1 [Source:UniProtKB/Swiss-Prot%3BAcc:Q9C5B9]	None
AT1G10850	-0.0233083	0.818521	1	15.3042	710	15.1725	700.667	NA	Leucine-rich repeat protein kinase family protein [Source:UniProtKB/TrEMBL%3BAcc:Q940B9]	None
AT1G10890	0.00855341	0.918731	1	27.779	949	28.8814	951.667	NA	unknown protein%3B FUNCTIONS IN: molecular_function unknown%3B INVOLVED IN: biological_process unknown%3B LOCATED IN: chloroplast%3B EXPRESSED IN: petal%2C flower%2C leaf%3B EXPRESSED DURING: LP.04 four leaves visible%2C 4 anthesis%2C petal differentiation and expans /.../age%3B BEST Arabidopsis thaliana protein match is: unknown protein (TAIR:AT5G13340.1)%3B Ha. [Source:TAIR%3BAcc:AT1G10890]	None
AT1G10910	0.0187129	0.836248	1	16.1844	610.333	16.8253	612.667	NA	Pentatricopeptide repeat-containing protein At1g10910%2C chloroplastic [Source:UniProtKB/Swiss-Prot%3BAcc:Q0WVV0]	None
AT1G10950	0.0436647	0.492339	1	79.6683	2691	83.2877	2748	TMN1	Transmembrane 9 superfamily member 1 [Source:UniProtKB/Swiss-Prot%3BAcc:Q940G0]	None
AT1G10960	-0.0421061	0.419699	1	1145.74	8161.33	1096.82	7857	FD1	Ferredoxin-1%2C chloroplastic [Source:UniProtKB/Swiss-Prot%3BAcc:O04090]	None
AT1G11020	0.0238049	0.851043	1	12.8885	261	13.3873	261.333	NA	RING/FYVE/PHD zinc finger superfamily protein [Source:UniProtKB/TrEMBL%3BAcc:Q8GYT4]	None
AT1G11050	0.0264103	0.886166	1	3.55185	136.667	3.64001	140.667	NA	Probable receptor-like protein kinase At1g11050 [Source:UniProtKB/Swiss-Prot%3BAcc:O04086]	None
AT1G11060	0.00480866	0.966498	1	6.70361	354	6.82634	352.667	NA	WAPL (Wings apart-like protein regulation of heterochromatin) protein [Source:UniProtKB/TrEMBL%3BAcc:F4I7C7]	None
AT1G11090	-0.0253564	0.900965	1	7.12698	119.667	7.08446	118	NA	Alpha/beta-Hydrolases superfamily protein [Source:UniProtKB/TrEMBL%3BAcc:O04083]	None
AT1G11110	-0.862173	0.806016	1	0.0262914	0.666667	0.0172653	0.333333	NA	LisH and RanBPM domains containing protein [Source:TAIR%3BAcc:AT1G11110]	None
AT1G11120	0.050511	0.877522	1	7.39005	33.3333	7.68974	34.3333	NA	unknown protein%3B BEST Arabidopsis thaliana protein match is: unknown protein (TAIR:AT1G09812.1)%3B Ha. [Source:TAIR%3BAcc:AT1G11120]	None
AT1G11125	-0.107818	0.819294	1	0.920715	14.6667	0.877218	13.3333	NA	unknown protein%3B BEST Arabidopsis thaliana protein match is: unknown protein (TAIR:AT1G61170.1). [Source:TAIR%3BAcc:AT1G11125]	None
AT1G11130	-0.035407	0.775272	1	7.96351	358.667	7.73569	350.667	SUB	Leucine-rich repeat receptor-like protein kinase (Fragment) [Source:UniProtKB/TrEMBL%3BAcc:C0LGE3]	None
AT1G11160	0.41172	0.0384623	1	1.19578	87.6667	1.62518	117	NA	Katanin p80 WD40 repeat-containing subunit B1 homolog [Source:UniProtKB/TrEMBL%3BAcc:F4I7E1]	None
AT1G11170	-0.307423	0.327117	1	1.23515	37.6667	1.03012	29.6667	NA	At1g11170/T28P6_16 [Source:UniProtKB/TrEMBL%3BAcc:Q8S9J5]	None
AT1G11180	-0.0966026	0.460511	1	13.8443	286.333	13.0923	265	NA	Secretory carrier membrane protein (SCAMP) family protein [Source:TAIR%3BAcc:AT1G11180]	None
AT1G11200	-0.1266	0.431267	1	12.2905	178.667	11.4345	161	NA	Protein of unknown function (DUF300) [Source:TAIR%3BAcc:AT1G11200]	None
AT1G11250	1.54109	0.395254	1	0.0477628	0.666667	0.135301	2	SYP125	Syntaxin-125 [Source:UniProtKB/Swiss-Prot%3BAcc:Q9SXB0]	None
AT1G11260	0.0189496	0.826524	1	89.6327	2895.33	90.2314	2902.67	STP1	STP1 [Source:UniProtKB/TrEMBL%3BAcc:A0A178WJ63]	None
AT1G11300	0.0783798	0.549269	1	2.39759	247	2.60339	257	NA	G-type lectin S-receptor-like serine/threonine-protein kinase At1g11300 [Source:UniProtKB/Swiss-Prot%3BAcc:Q9SXB4]	None
AT1G11320	0.0199072	0.931967	1	2.72608	70.3333	2.83903	69.6667	NA	GDSL esterase/lipase [Source:UniProtKB/TrEMBL%3BAcc:Q9SXB7]	None
AT1G11330	0.00764367	0.951365	1	6.33896	316	6.50903	317.667	NA	G-type lectin S-receptor-like serine/threonine-protein kinase At1g11330 [Source:UniProtKB/Swiss-Prot%3BAcc:Q9SXB8]	None
AT1G11380	-0.050371	0.705658	1	12.1807	241.667	12.0868	230.667	NA	At1g11380 [Source:UniProtKB/TrEMBL%3BAcc:Q8LFV5]	None
AT1G11400	-0.052009	0.678738	1	15.8777	313	15.6136	302	PYM	PYM [Source:UniProtKB/TrEMBL%3BAcc:A0A178W3L1]	None
AT1G11410	0.0109727	0.934051	1	7.62063	393	7.89389	401	NA	S-locus lectin protein kinase family protein [Source:TAIR%3BAcc:AT1G11410]	None
AT1G11430	-0.0155713	0.860388	1	158.299	2059	159.288	2007	MORF9	Multiple organellar RNA editing factor 9%2C chloroplastic [Source:UniProtKB/Swiss-Prot%3BAcc:Q9LPZ1]	None
AT1G11440	0.284377	0.139591	1	6.62232	124	8.4222	149.333	NA	At1g11440 [Source:UniProtKB/TrEMBL%3BAcc:Q9LPZ0]	None
AT1G11450	-0.0652324	0.684172	1	11.5405	193.333	10.7874	187.333	NA	WAT1-related protein [Source:UniProtKB/TrEMBL%3BAcc:A0A178WNM5]	None
AT1G11460	-0.205833	0.692639	1	1.28896	17.3333	1.15969	14.6667	NA	WAT1-related protein At1g11460 [Source:UniProtKB/Swiss-Prot%3BAcc:F4I8W6]	None
AT1G11475	-0.108492	0.381837	1	70.7034	419.333	67.8744	380.667	NRPB10	NRPE10 [Source:UniProtKB/TrEMBL%3BAcc:A0A178WP73]	None
AT1G11500	0.0927733	0.929453	1	0.546528	3.33333	0.613048	3.33333	NA	Protein of unknown function (DUF1218) [Source:TAIR%3BAcc:AT1G11500]	None
AT1G11530	-0.0505915	0.688937	1	44.0876	301.333	43.9427	285.333	CXXS1	Thioredoxin-like protein CXXS1 [Source:UniProtKB/Swiss-Prot%3BAcc:Q8LDI5]	None
AT1G11560	0.248234	0.652905	1	2.28755	12	2.49724	14.3333	OST3A	Probable dolichyl-diphosphooligosaccharide--protein glycosyltransferase subunit 3A [Source:UniProtKB/Swiss-Prot%3BAcc:F4I8X8]	None
AT1G11572	0.956433	0.74933	1	0	0	0.068275	0.333333	NA	Plant thionin family protein [Source:UniProtKB/TrEMBL%3BAcc:A7RED7]	None
AT1G11580	0.0393306	0.639653	1	48.8913	1562.67	50.7941	1606	ATPMEPCRA	methylesterase PCR A [Source:TAIR%3BAcc:AT1G11580]	None
AT1G11600	-0.231708	0.353456	1	17.9344	604	15.4208	503.333	CYP77B1	Cytochrome P450 like protein [Source:UniProtKB/TrEMBL%3BAcc:Q9SAB7]	None
AT1G11620	1.66209	0.681967	1	0	0	0.044727	0.666667	NA	Putative F-box/LRR-repeat/kelch-repeat protein At1g11620 [Source:UniProtKB/Swiss-Prot%3BAcc:Q9SAB5]	None
AT1G11650	0.0404793	0.502075	1	186.575	5006.67	193.402	5071.67	RBP45B	RBP45B [Source:UniProtKB/TrEMBL%3BAcc:A0A178WLD6]	None
AT1G11655	-0.406216	0.556422	1	1.51418	8.66667	1.16593	6.33333	NA	At1g11655 [Source:UniProtKB/TrEMBL%3BAcc:Q84VW6]	None
AT1G11660	0.0273943	0.749556	1	15.9056	763.667	16.6031	768.333	HSP70-16	Heat shock 70 kDa protein 16 [Source:UniProtKB/Swiss-Prot%3BAcc:Q9SAB1]	None
AT1G11680	-0.0228063	0.738502	1	71.7609	2029.33	71.2283	1976	CYP51G1	Sterol 14-demethylase [Source:UniProtKB/Swiss-Prot%3BAcc:Q9SAA9]	None
AT1G11700	-0.0396385	0.736155	1	23.8695	488.667	23.81	463.333	NA	At1g11700 [Source:UniProtKB/TrEMBL%3BAcc:Q9SAA7]	None
AT1G11710	0.00487855	0.958886	1	17.96	1315.33	18.4939	1323	NA	Pentatricopeptide repeat-containing protein At1g11710%2C mitochondrial [Source:UniProtKB/Swiss-Prot%3BAcc:Q9SAA6]	None
AT1G11750	-0.0484351	0.543295	1	95.3632	1989.67	93.1951	1885.67	CLPP6	ATP-dependent Clp protease proteolytic subunit [Source:UniProtKB/TrEMBL%3BAcc:F4IAG5]	None
AT1G11770	0.956431	0.797736	1	0	0	0.0091994	0.333333	NA	Berberine bridge enzyme-like 2 [Source:UniProtKB/Swiss-Prot%3BAcc:Q9SA99]	None
AT1G11790	0.105471	0.369324	1	17.6551	366	19.1345	394	ADT1	Arogenate dehydratase [Source:UniProtKB/TrEMBL%3BAcc:A0A178W336]	None
AT1G11810	0	1	1	0	0	0	0	NA	F-box protein At1g11810 [Source:UniProtKB/Swiss-Prot%3BAcc:Q9SA94]	None
AT1G11840	0.155797	0.0395469	1	133.854	2824	151.598	3142.67	ATGLX1	AT1G11840	None
AT1G11850	-0.142984	0.190534	1	66.8543	815.667	60.7364	724	NA	F12F1.31 protein [Source:UniProtKB/TrEMBL%3BAcc:O65397]	None
AT1G11860	-0.0098062	0.871988	1	751.829	22674.7	759.758	22332.3	NA	Glycine cleavage T-protein family [Source:TAIR%3BAcc:AT1G11860]	None
AT1G11870	0.0843579	0.381391	1	21.3223	623	22.775	651.333	OVA7	Serine--tRNA ligase%2C chloroplastic/mitochondrial [Source:UniProtKB/Swiss-Prot%3BAcc:Q8RWT8]	None
AT1G11890	0.0477148	0.62101	1	34.6402	563.333	36.5228	572.333	SEC22	SEC22 [Source:UniProtKB/TrEMBL%3BAcc:A0A178WBU4]	None
AT1G11905	-0.0383365	0.780279	1	16.236	269.333	16.1707	258.333	NA	B-cell receptor-associated protein 31-like protein [Source:UniProtKB/TrEMBL%3BAcc:Q8L702]	None
AT1G11915	0.319634	0.539721	1	0.674544	11.3333	0.858538	14	NA	F12F1.23 protein [Source:UniProtKB/TrEMBL%3BAcc:O65389]	None
AT1G11930	0.0800197	0.317335	1	46.8138	1077.33	51.0359	1124	NA	Pyridoxal phosphate homeostasis protein [Source:UniProtKB/TrEMBL%3BAcc:Q944L8]	None
AT1G12010	-0.569643	0.266534	1	0.589226	14.3333	0.381935	9.66667	NA	1-aminocyclopropane-1-carboxylate oxidase 3 [Source:UniProtKB/Swiss-Prot%3BAcc:O65378]	None
AT1G12040	0.162926	0.715863	1	7.88114	246.333	8.52123	274	LRX1	Leucine-rich repeat extensin-like protein 1 [Source:UniProtKB/Swiss-Prot%3BAcc:O65375]	None
AT1G12050	-0.00665655	0.935926	1	31.6361	872.333	31.6468	861	FAH	Fumarylacetoacetase [Source:UniProtKB/Swiss-Prot%3BAcc:Q8RW90]	None
AT1G12060	0.0368277	0.875964	1	7.95805	65	8.29287	65.6667	BAG5	BAG5 [Source:UniProtKB/TrEMBL%3BAcc:A0A178WFD4]	None
AT1G12080	-0.0929077	0.616989	1	310.36	3850	303.295	3513.33	NA	At1g12080 [Source:UniProtKB/TrEMBL%3BAcc:O65370]	None
AT1G12100	-0.146925	0.854336	1	3.15818	6.66667	2.76501	6.33333	NA	Bifunctional inhibitor/lipid-transfer protein/seed storage 2S albumin superfamily protein [Source:UniProtKB/TrEMBL%3BAcc:F4IC43]	None
AT1G12110	0.188373	0.00584345	1	138.541	5135.67	157.435	5756.33	NPF6.3	NRT1.1 [Source:UniProtKB/TrEMBL%3BAcc:A0A178W8F7]	None
AT1G12130	-0.13412	0.758401	1	1.24432	22	1.06621	21.3333	NA	Flavin-containing monooxygenase FMO GS-OX-like 6 [Source:UniProtKB/Swiss-Prot%3BAcc:Q9FWW3]	None
AT1G12140	0.092973	0.300214	1	30.1274	886.333	32.0811	934.333	FMOGS-OX5	Flavin-containing monooxygenase FMO GS-OX5 [Source:UniProtKB/Swiss-Prot%3BAcc:A8MRX0]	None
AT1G12200	0.0190318	0.847496	1	24.7912	790.333	25.1617	795	NA	Flavin-containing monooxygenase [Source:UniProtKB/TrEMBL%3BAcc:A0A178W1K3]	None
AT1G12210	0.29265	0.587611	1	0.357306	20.3333	0.455037	23.6667	RFL1	Disease resistance protein RFL1 [Source:UniProtKB/Swiss-Prot%3BAcc:Q8L3R3]	None
AT1G12220	0.142075	0.393787	1	2.77035	161.333	3.2146	175.333	RPS5	Disease resistance protein [Source:UniProtKB/TrEMBL%3BAcc:Q56YM8]	None
AT1G12230	-0.0571709	0.371098	1	106.762	2353.67	103.106	2233.67	NA	Aldolase superfamily protein [Source:UniProtKB/TrEMBL%3BAcc:F4IC59]	None
AT1G12240	0.0779225	0.3307	1	56.8728	2506.33	61.2113	2628	BFRUCT4	Acid beta-fructofuranosidase 4%2C vacuolar [Source:UniProtKB/Swiss-Prot%3BAcc:Q39041]	None
AT1G12250	-0.000656717	0.992877	1	90.3861	1451	91.079	1433.67	TL20.3	Thylakoid lumenal protein TL20.3%2C chloroplastic [Source:UniProtKB/Swiss-Prot%3BAcc:Q8H1Q1]	None
AT1G12270	0.000446338	0.995954	1	23.5768	914.667	24.2251	904.667	HOP1	Hop1 [Source:UniProtKB/TrEMBL%3BAcc:A0A178WM19]	None
AT1G12320	-0.348122	0.179288	1	4.72467	73	3.79676	57.6667	NA	Ankyrin repeat/KH domain protein (DUF1442) [Source:UniProtKB/TrEMBL%3BAcc:Q9LNB3]	None
AT1G12330	0.00173114	0.98844	1	18.0926	454	18.1307	455.667	NA	Cyclin-dependent kinase-like protein [Source:UniProtKB/TrEMBL%3BAcc:Q9LNB2]	None
AT1G12340	-0.194599	0.338176	1	13.5483	99	12.0661	85	NA	Probable protein cornichon homolog 2 [Source:UniProtKB/Swiss-Prot%3BAcc:Q3EDD7]	None
AT1G12350	0.00197466	0.978678	1	29.1424	1265.67	29.87	1259.67	PPCS1	Phosphopantothenate--cysteine ligase 1 [Source:UniProtKB/Swiss-Prot%3BAcc:Q8GXR5]	None
AT1G12390	0.186084	0.56208	1	2.37014	31.6667	2.72791	36	NA	Protein cornichon homolog 4 [Source:UniProtKB/Swiss-Prot%3BAcc:Q84W04]	None
AT1G12400	-1.634	0.686909	1	0.129934	0.666667	0	0	NA	Nucleotide excision repair%2C TFIIH%2C subunit TTDA [Source:TAIR%3BAcc:AT1G12400]	None
AT1G12410	-0.0353093	0.611338	1	112.802	1977	111.742	1901	CLPR2	ATP-dependent Clp protease proteolytic subunit-related protein 2%2C chloroplastic [Source:UniProtKB/Swiss-Prot%3BAcc:Q9XJ36]	None
AT1G12450	0.237235	0.287207	1	4.97701	84.6667	5.85843	102	NA	At1g12450 [Source:UniProtKB/TrEMBL%3BAcc:Q6NQK3]	None
AT1G12460	0.0747656	0.513987	1	6.40596	316	6.83837	331	NA	Probable LRR receptor-like serine/threonine-protein kinase At1g12460 [Source:UniProtKB/Swiss-Prot%3BAcc:C0LGE4]	None
AT1G12470	0.0671784	0.49279	1	13.9565	903.667	14.9771	929.667	VPS18	Vacuolar sorting protein 18 [Source:UniProtKB/Swiss-Prot%3BAcc:F4IDS7]	None
AT1G12550	0.291137	0.24477	1	3.07365	55.6667	3.85775	66.6667	HPR3	Glyoxylate/hydroxypyruvate reductase HPR3 [Source:UniProtKB/Swiss-Prot%3BAcc:Q9LE33]	None
AT1G12560	0.0703007	0.789866	1	7.06028	115.333	7.35206	121	EXPA7	Expansin [Source:UniProtKB/TrEMBL%3BAcc:A0A178W749]	None
AT1G12580	0.0474773	0.566539	1	21.1281	846.333	22.2449	867.667	PEPKR1	PEPKR1 [Source:UniProtKB/TrEMBL%3BAcc:A0A178WE53]	None
AT1G12630	0.0944107	0.904786	1	0.566411	6.33333	0.609534	6.66667	ERF027	Ethylene-responsive transcription factor ERF027 [Source:UniProtKB/Swiss-Prot%3BAcc:Q38Q39]	None
AT1G12650	-0.2441	0.0851006	1	14.3638	252.667	12.5365	212	NA	At1g12650/T12C24_1 [Source:UniProtKB/TrEMBL%3BAcc:Q8W1E4]	None
AT1G12730	0.0885906	0.568577	1	6.63366	162	7.05101	173	NA	GPI transamidase subunit PIG-U [Source:UniProtKB/TrEMBL%3BAcc:Q94K70]	None
AT1G12740	-0.0249809	0.923222	1	2.91582	97.6667	2.90659	95	CYP87A2	Cytochrome P450%2C family 87%2C subfamily A%2C polypeptide 2 [Source:UniProtKB/TrEMBL%3BAcc:Q9LN73]	None
AT1G12760	0.0612103	0.474062	1	29.5176	844.667	31.1818	878.333	NA	E3 ubiquitin-protein ligase At1g12760 [Source:UniProtKB/Swiss-Prot%3BAcc:Q9LN71]	None
AT1G12770	0.0292188	0.735881	1	29.2698	1177	30.5117	1175.67	RH47	DEAD-box ATP-dependent RNA helicase 47%2C mitochondrial [Source:UniProtKB/Swiss-Prot%3BAcc:Q8W4E1]	None
AT1G12775	0.317334	0.265783	1	1.19534	41.3333	1.54049	50.3333	NA	Pentatricopeptide repeat-containing protein At1g12775%2C mitochondrial [Source:UniProtKB/Swiss-Prot%3BAcc:Q9LPX2]	None
AT1G12810	0.059641	0.577267	1	59.6246	444.667	61.279	457	NA	Proline-rich family protein [Source:UniProtKB/TrEMBL%3BAcc:F4IDX2]	None
AT1G12840	0.0142641	0.841551	1	121.418	2685	125.495	2667	VHA-C	V-type proton ATPase subunit C [Source:UniProtKB/Swiss-Prot%3BAcc:Q9SDS7]	None
AT1G12855	0.0500307	0.981687	1	0.0432807	1	0.045571	1	NA	Putative F-box protein At1g12855 [Source:UniProtKB/Swiss-Prot%3BAcc:Q9LPW4]	None
AT1G12860	-0.0636915	0.620477	1	14.4845	379.667	14.0974	360.333	SCRM2	Transcription factor SCREAM2 [Source:UniProtKB/Swiss-Prot%3BAcc:Q9LPW3]	None
AT1G12880	-0.169162	0.498191	1	6.21525	81	5.55555	72	NUDT12	NUDT12 [Source:UniProtKB/TrEMBL%3BAcc:A0A178WEE5]	None
AT1G12890	-0.853195	0.653228	1	0.151563	1.33333	0.08919	0.666667	ERF088	Ethylene-responsive transcription factor ERF088 [Source:UniProtKB/Swiss-Prot%3BAcc:Q3E703]	None
AT1G12940	0.764781	0.0529881	1	0.650101	20.6667	1.10474	35.3333	NRT2.5	High affinity nitrate transporter 2.5 [Source:UniProtKB/Swiss-Prot%3BAcc:Q9LPV5]	None
AT1G12950	0.329787	0.174264	1	2.29266	81	2.93672	100.333	DTX31	Protein DETOXIFICATION [Source:UniProtKB/TrEMBL%3BAcc:A0A178WCP4]	None
AT1G12970	0.116018	0.476561	1	5.12536	136.333	5.62924	147.333	PIRL3	Plant intracellular Ras-group-related LRR protein 3 [Source:UniProtKB/Swiss-Prot%3BAcc:Q8W4Q3]	None
AT1G12980	-0.186515	0.905262	1	0.0806691	1.66667	0.0742978	1.33333	ESR1	Ethylene-responsive transcription factor ESR1 [Source:UniProtKB/Swiss-Prot%3BAcc:Q9SAD4]	None
AT1G12990	-0.195602	0.0951802	1	10.9037	329	9.65668	284.667	NA	Beta-1%2C4-N-acetylglucosaminyltransferase family protein [Source:UniProtKB/TrEMBL%3BAcc:F4HP06]	None
AT1G13040	0.141568	0.40083	1	4.19804	142	4.77791	156.333	NA	Pentatricopeptide repeat-containing protein At1g13040%2C mitochondrial [Source:UniProtKB/Swiss-Prot%3BAcc:Q9SAD9]	None
AT1G13060	-0.00234555	0.973883	1	101.281	1888.67	102.578	1848	PBE1	20S proteasome beta subunit E1 [Source:UniProtKB/TrEMBL%3BAcc:F4HP14]	None
AT1G13080	-0.0679497	0.456459	1	47.5577	1276.33	46.407	1201	CYP71B2	Cytochrome P450 71B2 [Source:UniProtKB/Swiss-Prot%3BAcc:O65788]	None
AT1G13090	0.0910707	0.326438	1	18.6628	528.333	20.342	557.333	CYP71B28	Cytochrome P450 71B28 [Source:UniProtKB/Swiss-Prot%3BAcc:Q9SAE3]	None
AT1G13100	0.0604384	0.629721	1	12.7482	324	13.5617	336	CYP71B29	Cytochrome P450 71B29 [Source:UniProtKB/Swiss-Prot%3BAcc:Q9SAE4]	None
AT1G13110	0.138915	0.0633714	1	80.3518	2331	90.388	2533.67	CYP71B7	CYP71B7 [Source:UniProtKB/TrEMBL%3BAcc:A0A178WGC6]	None
AT1G13130	-0.150347	0.823006	1	0.339048	10.3333	0.310382	9	NA	At1g13130 [Source:UniProtKB/TrEMBL%3BAcc:Q66GP7]	None
AT1G13160	0.0182356	0.850913	1	11.3725	520	11.8218	523	NA	ARM repeat superfamily protein [Source:UniProtKB/TrEMBL%3BAcc:Q0WVH7]	None
AT1G13180	0.156394	0.285194	1	4.88794	169.333	5.65613	185	ARP3	Actin-related protein 3 [Source:UniProtKB/Swiss-Prot%3BAcc:Q9SAF1]	None
AT1G13190	-0.0495231	0.55262	1	14.5393	718.333	14.4775	688.667	NA	F3F19.21 protein [Source:UniProtKB/TrEMBL%3BAcc:Q9SAF2]	None
AT1G13220	0.00797889	0.943002	1	6.92855	554	7.36222	556.333	LINC2	nuclear matrix constituent protein-related [Source:TAIR%3BAcc:AT1G13220]	None
AT1G13230	0.380969	0.675729	1	0.238658	4.33333	0.297264	6	PII-2	Piriformospora indica-insensitive protein 2 [Source:UniProtKB/Swiss-Prot%3BAcc:Q5PP26]	None
AT1G13260	0.0768657	0.48638	1	22.4529	623	24.102	651.333	RAV1	AP2/ERF and B3 domain-containing transcription factor RAV1 [Source:UniProtKB/Swiss-Prot%3BAcc:Q9ZWM9]	None
AT1G13270	-0.0291285	0.745812	1	43.2865	900.333	43.4673	867.333	MAP1B	Methionine aminopeptidase 1B%2C chloroplastic [Source:UniProtKB/Swiss-Prot%3BAcc:Q9FV52]	None
AT1G13280	-0.227413	0.0638507	1	18.4869	284.667	15.9303	240.333	AOC4	Allene oxide cyclase 4%2C chloroplastic [Source:UniProtKB/Swiss-Prot%3BAcc:Q93ZC5]	None
AT1G13300	0.195377	0.15622	1	12.88	326	14.9525	373.667	HRS1	Transcription factor HRS1 [Source:UniProtKB/Swiss-Prot%3BAcc:Q9FX67]	None
AT1G13330	-0.487439	0.219735	1	1.62799	28.6667	1.19635	20.3333	HOP2	Homologous-pairing protein 2 homolog [Source:UniProtKB/Swiss-Prot%3BAcc:Q9FX64]	None
AT1G13400	0.0951953	0.933305	1	0.406011	3	0.457674	3	JGL	Zinc finger protein JAGGED-like [Source:UniProtKB/Swiss-Prot%3BAcc:Q6S592]	None
AT1G13410	-0.110608	0.696356	1	1.62295	54.3333	1.54166	49.6667	NA	Tetratricopeptide repeat (TPR)-like superfamily protein [Source:UniProtKB/TrEMBL%3BAcc:Q0WVP2]	None
AT1G13420	-0.155545	0.733744	1	6.8755	134.333	6.4379	114.667	SOT8	Cytosolic sulfotransferase 8 [Source:UniProtKB/Swiss-Prot%3BAcc:Q9FX56]	None
AT1G13430	0.130153	0.545696	1	6.43971	120	7.12767	132.333	STO9	Cytosolic sulfotransferase 9 [Source:UniProtKB/Swiss-Prot%3BAcc:Q9FX55]	None
AT1G13460	-0.0135082	0.904154	1	12.4029	351.667	12.5844	345.667	B'THETA	Serine/threonine protein phosphatase 2A 57 kDa regulatory subunit B' theta isoform [Source:UniProtKB/Swiss-Prot%3BAcc:Q8LF36]	None
AT1G13590	-0.10823	0.750831	1	9.74745	52	8.67099	47.6667	PSK1	Phytosulfokines 1 [Source:UniProtKB/Swiss-Prot%3BAcc:Q9LMY9]	None
AT1G13607	1.83959	0.648841	1	0	0	0.48145	0.666667	NA	Defensin-like protein 286 [Source:UniProtKB/Swiss-Prot%3BAcc:Q2L6T6]	None
AT1G13609	-1.57291	0.577938	1	0.409543	1	0.160605	0.333333	NA	Defensin-like protein 287 [Source:UniProtKB/Swiss-Prot%3BAcc:Q2V4N4]	None
AT1G13620	-0.753069	0.610301	1	0.281431	2.33333	0.180577	1.33333	RGF2	Root meristem growth factor 2 [Source:UniProtKB/Swiss-Prot%3BAcc:Q6DSU1]	None
AT1G13635	0.169169	0.673896	1	1.37698	25.3333	1.62781	27	NA	DNA glycosylase superfamily protein [Source:UniProtKB/TrEMBL%3BAcc:F4HSJ2]	None
AT1G13670	-0.0728922	0.536311	1	26.3101	359	25.3488	337.667	NA	At1g13670 [Source:UniProtKB/TrEMBL%3BAcc:Q9LMY0]	None
AT1G13680	-0.143341	0.900925	1	0.169031	3.33333	0.169227	2.66667	NA	F21F23.12 protein [Source:UniProtKB/TrEMBL%3BAcc:Q9LMX9]	None
AT1G13690	-0.0619934	0.592762	1	24.4777	361.333	24.1104	340.667	ATE1	ATE1 [Source:UniProtKB/TrEMBL%3BAcc:A0A178WKP3]	None
AT1G13730	-0.0169395	0.868201	1	18.8578	537.667	19.0273	528.667	NA	At1g13730 [Source:UniProtKB/TrEMBL%3BAcc:Q9LMX6]	None
AT1G13740	-0.111556	0.466629	1	5.53434	176	5.36316	159.667	AFP2	AFP2 [Source:UniProtKB/TrEMBL%3BAcc:A0A178WBB1]	None
AT1G13770	0.135027	0.378469	1	7.69122	171.333	8.50164	187.333	RUS3	RUS3 [Source:UniProtKB/TrEMBL%3BAcc:A0A178WJD5]	None
AT1G13780	0.00240849	0.991516	1	2.78203	65.6667	2.8001	65.6667	NA	F-box/FBD/LRR-repeat protein At1g13780 [Source:UniProtKB/Swiss-Prot%3BAcc:Q56XS8]	None
AT1G13790	0.0132856	0.945401	1	1.93106	107.667	2.04615	108	FDM4	Factor of DNA methylation 4 [Source:UniProtKB/Swiss-Prot%3BAcc:Q9LMH6]	None
AT1G13810	-0.0617264	0.706614	1	7.72744	163.333	7.57466	154.333	NA	Restriction endonuclease%2C type II-like superfamily protein [Source:UniProtKB/TrEMBL%3BAcc:Q5XVK9]	None
AT1G13820	-0.0726124	0.380759	1	42.292	907	40.5979	861	NA	Alpha/beta-Hydrolases superfamily protein [Source:UniProtKB/TrEMBL%3BAcc:Q6NL07]	None
AT1G13880	0.0423939	0.711088	1	13.7307	406	14.5119	412.667	NA	ELM2 domain-containing protein [Source:TAIR%3BAcc:AT1G13880]	None
AT1G13910	-0.0893338	0.646866	1	5.4571	106.333	5.12313	100.667	NA	Leucine-rich repeat (LRR) family protein [Source:UniProtKB/TrEMBL%3BAcc:Q8GYK0]	None
AT1G13920	-0.179001	0.508542	1	2.62978	55	2.35417	49	NA	Remorin family protein [Source:TAIR%3BAcc:AT1G13920]	None
AT1G13930	-0.0940795	0.137898	1	703.519	6675	663.953	6118	NA	At1g13930/F16A14.27 [Source:UniProtKB/TrEMBL%3BAcc:Q9XI93]	None
AT1G13950	0.099781	0.645866	1	10.8733	95.6667	11.8719	101.333	ELF5A-1	Eukaryotic translation initiation factor 5A [Source:UniProtKB/TrEMBL%3BAcc:A0A178WBN7]	None
AT1G13960	0.293253	0.0232805	1	9.01391	319	11.2153	387	WRKY4	Probable WRKY transcription factor 4 [Source:UniProtKB/Swiss-Prot%3BAcc:Q9XI90]	None
AT1G13980	-0.00108984	0.988412	1	28.1129	1547	29.7515	1534.33	GN	ARF guanine-nucleotide exchange factor GNOM [Source:UniProtKB/Swiss-Prot%3BAcc:Q42510]	None
AT1G14000	0.0343053	0.698192	1	39.5502	1225.33	41.3547	1244	VIK	At1g14000 [Source:UniProtKB/TrEMBL%3BAcc:Q9XI87]	None
AT1G14020	-0.0830604	0.49154	1	10.7049	368.667	10.2338	344.667	OFUT3	O-fucosyltransferase 3 [Source:UniProtKB/Swiss-Prot%3BAcc:Q6NQ51]	None
AT1G14040	0.148696	0.319011	1	5.23354	187.333	5.8201	207.667	PHO1%3BH3	Phosphate transporter PHO1 homolog 3 [Source:UniProtKB/Swiss-Prot%3BAcc:Q6R8G7]	None
AT1G14070	0.196559	0.202897	1	8.23584	164	9.49348	188.667	NA	NA	None
AT1G14080	-0.217694	0.360722	1	2.41857	63.3333	2.09264	54.3333	FUT6	Fucosyltransferase 6 [Source:UniProtKB/Swiss-Prot%3BAcc:Q9XI80]	None
AT1G14100	1.89294	0.407367	1	0.0140046	0.333333	0.0717236	1.33333	FUT8	Glycosyltransferase (Fragment) [Source:UniProtKB/TrEMBL%3BAcc:W8PVC8]	None
AT1G14150	-0.0331752	0.681318	1	132.466	1638	130.214	1584.67	PNSL2	Photosynthetic NDH subunit of lumenal location 2%2C chloroplastic [Source:UniProtKB/Swiss-Prot%3BAcc:Q9XI73]	None
AT1G14180	-0.105072	0.61291	1	3.77132	98.3333	3.54917	90.3333	NA	Putative mandelonitrile lyase [Source:UniProtKB/TrEMBL%3BAcc:Q8GXX6]	None
AT1G14185	-0.333137	0.247893	1	1.74367	53.6667	1.39404	42.6667	NA	At1g14180/F7A19_27 [Source:UniProtKB/TrEMBL%3BAcc:Q9XI69]	None
AT1G14190	-1.58704	0.259627	1	0.0765728	3.33333	1.706e-05	1	NA	Glucose-methanol-choline (GMC) oxidoreductase family protein [Source:TAIR%3BAcc:AT1G14190]	None
AT1G14205	0.295301	0.332475	1	6.22651	39.3333	7.80942	47.3333	NA	Ribosomal L18p/L5e family protein [Source:TAIR%3BAcc:AT1G14205]	None
AT1G14230	0.0781115	0.51255	1	9.24285	275.333	9.88806	288.667	APY4	Probable apyrase 4 [Source:UniProtKB/Swiss-Prot%3BAcc:Q8H1D8]	None
AT1G14240	-0.00118726	0.996113	1	2.32994	64	2.13886	62	APY3	Probable apyrase 3 [Source:UniProtKB/Swiss-Prot%3BAcc:Q9XI62]	None
AT1G14250	0.222882	0.533803	1	0.78712	26.3333	0.96823	30.6667	APY5	Probable apyrase 5 [Source:UniProtKB/Swiss-Prot%3BAcc:Q6NQA8]	None
AT1G14260	0.14415	0.714148	1	1.12774	23.6667	1.28966	26	NA	At1g14260 [Source:UniProtKB/TrEMBL%3BAcc:Q4PS45]	None
AT1G14280	-0.0303885	0.752505	1	27.4757	624.333	27.7484	611	PKS2	Protein PHYTOCHROME KINASE SUBSTRATE 2 [Source:UniProtKB/Swiss-Prot%3BAcc:Q9M9T4]	None
AT1G14310	-0.118633	0.479424	1	10.8684	139	10.2067	127	NA	F14L17.7 protein [Source:UniProtKB/TrEMBL%3BAcc:Q9M9T1]	None
AT1G14320	-0.0579812	0.43495	1	739.686	11281.3	719.772	10638	RPL10A	60S ribosomal protein L10-1 [Source:UniProtKB/Swiss-Prot%3BAcc:Q93VT9]	None
AT1G14340	-0.0902453	0.483566	1	18.2779	257.333	17.4236	239.667	NA	RNA-binding (RRM/RBD/RNP motifs) family protein [Source:UniProtKB/TrEMBL%3BAcc:Q949S4]	None
AT1G14345	-0.0577457	0.388515	1	224.284	2059.67	216.359	1953	NA	NAD(P)-linked oxidoreductase superfamily protein [Source:UniProtKB/TrEMBL%3BAcc:Q949S6]	None
AT1G14350	-0.141926	0.218653	1	12.4979	436.667	11.5678	396.333	MYB124	MYB124 [Source:UniProtKB/TrEMBL%3BAcc:A0A178W3Z3]	None
AT1G14370	0.280517	0.114006	1	6.04155	165.667	7.38482	202.667	PBL2	PBL2 [Source:UniProtKB/TrEMBL%3BAcc:A0A178WI52]	None
AT1G14390	-0.140261	0.59279	1	1.69343	58	1.58612	52.3333	NA	Probable LRR receptor-like serine/threonine-protein kinase At1g14390 [Source:UniProtKB/Swiss-Prot%3BAcc:Q9M9S4]	None
AT1G14430	0.179053	0.275917	1	6.86789	215.333	7.67406	244.667	NA	F14L17.20 protein [Source:UniProtKB/TrEMBL%3BAcc:Q9M9S1]	None
AT1G14470	-0.112396	0.600688	1	2.08282	84.3333	1.53463	79.3333	PCMP-A4	Pentatricopeptide repeat-containing protein At1g14470 [Source:UniProtKB/Swiss-Prot%3BAcc:Q9M9R6]	None
AT1G14500	-2.62167	0.243329	1	0.0564117	1.33333	0	0	NA	Ankyrin repeat family protein [Source:UniProtKB/TrEMBL%3BAcc:Q9M9R3]	None
AT1G14550	-0.161964	0.738701	1	1.42127	21.3333	1.24393	20	PER5	Peroxidase 5 [Source:UniProtKB/Swiss-Prot%3BAcc:Q9M9Q9]	None
AT1G14560	-0.0427733	0.733131	1	9.2614	275.333	9.05526	267.667	COAC1	Mitochondrial carrier protein CoAc1 [Source:UniProtKB/Swiss-Prot%3BAcc:F4HW79]	None
AT1G14570	0.0222369	0.754997	1	44.6684	1353.33	45.88	1364	PUX7	Plant UBX domain-containing protein 7 [Source:UniProtKB/Swiss-Prot%3BAcc:Q94JZ8]	None
AT1G14580	0.00444901	0.961822	1	25.5518	593.667	24.4911	594.667	NA	C2H2-like zinc finger protein [Source:TAIR%3BAcc:AT1G14580]	None
AT1G14630	0.1851	0.566344	1	3.23902	35.3333	3.70834	40.3333	NA	unknown protein%3B BEST Arabidopsis thaliana protein match is: unknown protein (TAIR:AT2G01990.1)%3B Ha. [Source:TAIR%3BAcc:AT1G14630]	None
AT1G14640	-0.516451	0.00802522	1	2.65521	139.667	1.9037	98.6667	NA	SWAP (Suppressor-of-White-APricot)/surp domain-containing protein [Source:UniProtKB/TrEMBL%3BAcc:F4HW92]	None
AT1G14650	-0.0362607	0.657321	1	26.7685	1460	26.6008	1406	NA	Probable splicing factor 3A subunit 1 [Source:UniProtKB/Swiss-Prot%3BAcc:Q8RXF1]	None
AT1G14670	0.016047	0.8226	1	76.4586	2328	78.0471	2331.33	TMN2	Transmembrane 9 superfamily member 2 [Source:UniProtKB/Swiss-Prot%3BAcc:Q940S0]	None
AT1G14680	0.34754	0.471549	1	1.02182	13.6667	1.3421	17.3333	NA	Early endosome antigen [Source:UniProtKB/TrEMBL%3BAcc:Q9LE70]	None
AT1G14685	-0.015508	0.869116	1	29.5486	628.667	29.5671	621.333	BPC2	BPC2 [Source:UniProtKB/TrEMBL%3BAcc:A0A178W364]	None
AT1G14687	0.115012	0.683505	1	3.89789	44	4.19638	48.6667	ZHD14	ZHD14 [Source:UniProtKB/TrEMBL%3BAcc:A0A178W745]	None
AT1G14700	0.116197	0.254171	1	29.1234	551	31.8938	595.333	PAP3	Purple acid phosphatase 3 [Source:UniProtKB/Swiss-Prot%3BAcc:Q8H129]	None
AT1G14730	-0.0309059	0.837305	1	17.2997	215.333	16.8195	208.667	CYB561C	Probable transmembrane ascorbate ferrireductase 3 [Source:UniProtKB/Swiss-Prot%3BAcc:Q67ZF6]	None
AT1G14780	0.23612	0.261536	1	2.23488	85	2.65258	98.6667	NA	MACPF domain-containing protein At1g14780 [Source:UniProtKB/Swiss-Prot%3BAcc:Q8L612]	None
AT1G14860	-0.251342	0.193052	1	9.89491	144.333	8.60811	117.333	NUDT18	Nudix hydrolase 18%2C mitochondrial [Source:UniProtKB/Swiss-Prot%3BAcc:Q9LQU5]	None
AT1G14890	-0.108795	0.35209	1	39.6785	627	36.6498	577.333	NA	Plant invertase/pectin methylesterase inhibitor superfamily protein [Source:UniProtKB/TrEMBL%3BAcc:F4HXW0]	None
AT1G14920	-0.103824	0.304768	1	28.5356	920.333	26.7451	841	GAI	DELLA protein GAI [Source:UniProtKB/Swiss-Prot%3BAcc:Q9LQT8]	None
AT1G15000	0.0437558	0.672092	1	19.8063	538	20.5457	554.333	SCPL50	Serine carboxypeptidase-like 50 [Source:UniProtKB/Swiss-Prot%3BAcc:Q9M9Q6]	None
AT1G15010	-0.190889	0.735873	1	2.06817	14.6667	1.87651	12.3333	NA	Mediator of RNA polymerase II transcription subunit [Source:UniProtKB/TrEMBL%3BAcc:Q8LCU9]	None
AT1G15015	-0.967121	0.812647	1	0.0302217	0.333333	0	0	NA	F-box protein At1g15015 [Source:UniProtKB/Swiss-Prot%3BAcc:Q9M9Q4]	None
[truncated: 21,245 more rows]
